# Supplementary material for: A genome-wide scan for selection signatures in Yorkshire and Landrace pigs based on sequencing data
Source: PubMed Central journal article supplement — Anim Genet. 2014 Oct 19;45(6):808–16. doi: 10.1111/age.12229 (PMC4276287; doi:10.1111/age.12229), 2014-10-19

**Figure S2** Distribution of the number of QTL overlapping with putatively selected core regions displaying the lowest  $P$ -values (top five). The Y-axis represents frequency, and the X-axis represents the traits of the QTL.

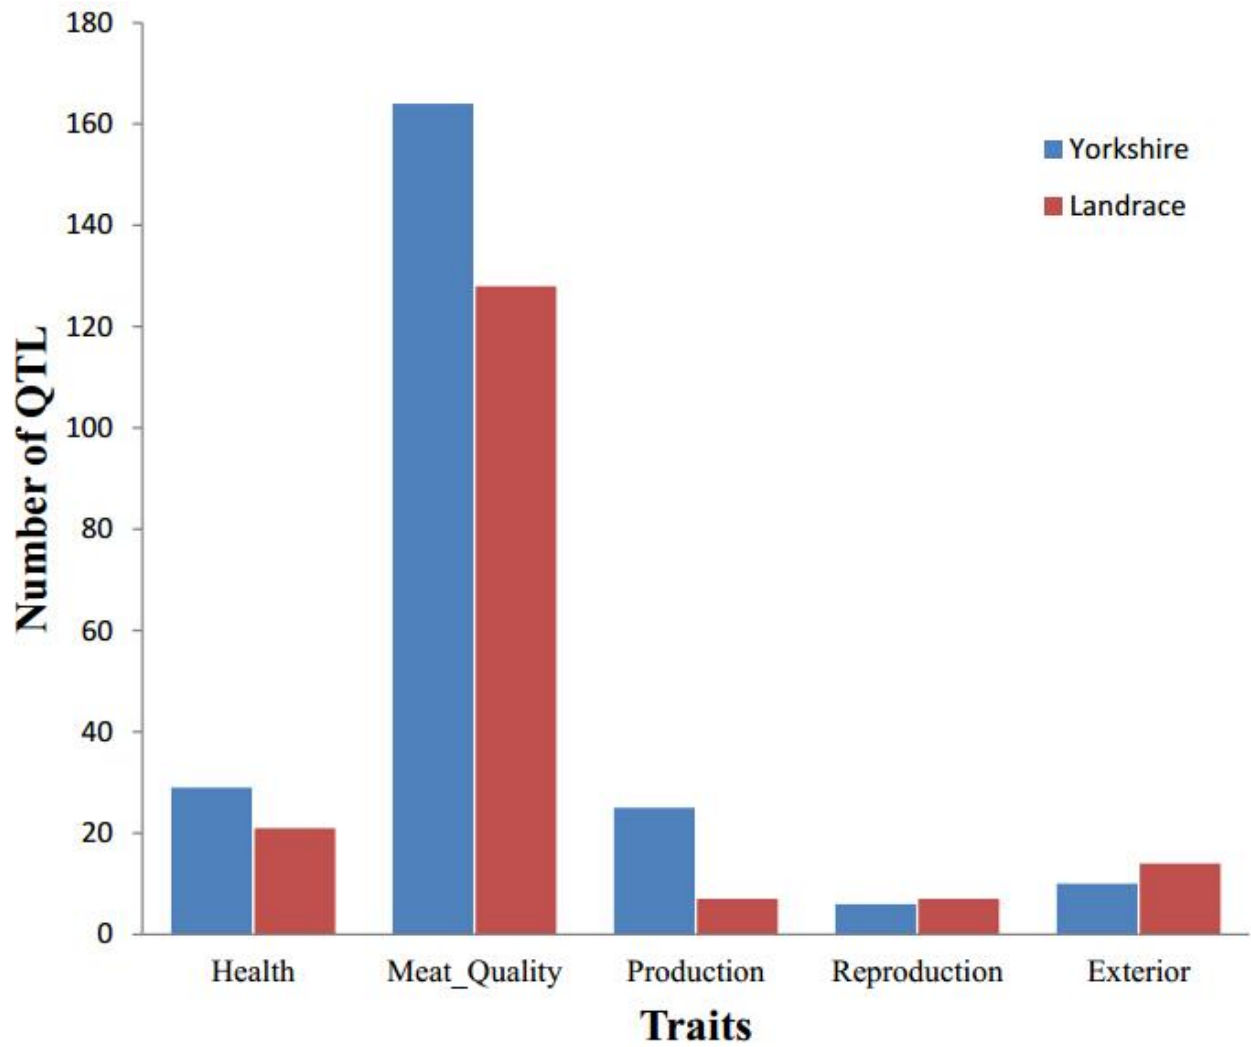

Supplement: age0045-0808-sd2.pdf [file age0045-0808-sd2.pdf]
