# Supplementary material for: A genome-wide scan for selection signatures in Yorkshire and Landrace pigs based on sequencing data
Source: PubMed Central journal article supplement — Anim Genet. 2014 Oct 19;45(6):808–16. doi: 10.1111/age.12229 (PMC4276287; doi:10.1111/age.12229), 2014-10-19
Supplement: age0045-0808-sd4.pdf [file age0045-0808-sd4.pdf]

**Table S2** Core region positions in Landrace, including the chromosome number, start position, end position and length.

| <b>Chromosome</b> | <b>Start Base</b> | <b>End Base</b> | <b>length(kb)</b> |
|-------------------|-------------------|-----------------|-------------------|
| 1                 | 6806              | 20937           | 14.131            |
| 1                 | 20944             | 28646           | 7.702             |
| 1                 | 33942             | 40726           | 6.784             |
| 1                 | 50333             | 157009          | 106.676           |
| 1                 | 160447            | 173016          | 12.569            |
| 1                 | 319836            | 539536          | 219.7             |
| 1                 | 720142            | 847811          | 127.669           |
| 1                 | 905113            | 920642          | 15.529            |
| 1                 | 926260            | 926271          | 0.011             |
| 1                 | 942299            | 948676          | 6.377             |
| 1                 | 990334            | 1008322         | 17.988            |
| 1                 | 1061906           | 1068776         | 6.87              |
| 1                 | 1100945           | 1129317         | 28.372            |
| 1                 | 1174400           | 1897479         | 723.079           |
| 1                 | 2040727           | 2058651         | 17.924            |
| 1                 | 2058663           | 2069875         | 11.212            |
| 1                 | 2070058           | 2083051         | 12.993            |
| 1                 | 2100254           | 2111743         | 11.489            |
| 1                 | 2124017           | 2128783         | 4.766             |
| 1                 | 2154763           | 2164113         | 9.35              |
| 1                 | 2175364           | 2202541         | 27.177            |
| 1                 | 2212019           | 2213721         | 1.702             |
| 1                 | 2216462           | 2216515         | 0.053             |
| 1                 | 2230139           | 2232724         | 2.585             |
| 1                 | 2276595           | 2322391         | 45.796            |
| 1                 | 2322984           | 2324945         | 1.961             |
| 1                 | 2358617           | 2386302         | 27.685            |
| 1                 | 2401554           | 2402862         | 1.308             |
| 1                 | 2402886           | 2402914         | 0.028             |
| 1                 | 2403076           | 2403107         | 0.031             |
| 1                 | 2461925           | 2479713         | 17.788            |
| 1                 | 2557006           | 2594708         | 37.702            |
| 1                 | 2597740           | 2613289         | 15.549            |
| 1                 | 2613501           | 2655379         | 41.878            |
| 1                 | 2661809           | 2676074         | 14.265            |
| 1                 | 2677518           | 2687833         | 10.315            |
| 1                 | 2720060           | 2728112         | 8.052             |
| 1                 | 2872047           | 2872209         | 0.162             |
| 1                 | 2878978           | 2898774         | 19.796            |
| 1                 | 2899279           | 2905736         | 6.457             |
| 1                 | 3110243           | 3189874         | 79.631            |
| 1                 | 3255692           | 3272245         | 16.553            |
| 1                 | 3439712           | 3456990         | 17.278            |
| 1                 | 3495019           | 3495069         | 0.05              |
| 1                 | 3511588           | 3521510         | 9.922             |
| 1                 | 3521575           | 3521721         | 0.146             |
| 1                 | 3521739           | 3521841         | 0.102             |
| 1                 | 3540848           | 3541095         | 0.247             |
| 1                 | 3611042           | 3640776         | 29.734            |
| 1                 | 4074654           | 4083547         | 8.893             |
| 1                 | 4143747           | 4242597         | 98.85             |
| 1                 | 4293306           | 4346381         | 53.075            |
| 1                 | 4346403           | 4471895         | 125.492           |
| 1                 | 4676086           | 4686992         | 10.906            |
| 1                 | 5230866           | 5410138         | 179.272           |
| 1                 | 5410693           | 5517046         | 106.353           |
| 1                 | 5744136           | 5764975         | 20.839            |

|   |          |          |         |
|---|----------|----------|---------|
| 1 | 5794619  | 5803125  | 8.506   |
| 1 | 5810103  | 5869590  | 59.487  |
| 1 | 5874440  | 5874619  | 0.179   |
| 1 | 5972790  | 5972947  | 0.157   |
| 1 | 6187064  | 6535402  | 348.338 |
| 1 | 6535414  | 6553752  | 18.338  |
| 1 | 6731142  | 6731168  | 0.026   |
| 1 | 6736849  | 6924456  | 187.607 |
| 1 | 7003729  | 7003918  | 0.189   |
| 1 | 7003934  | 7055437  | 51.503  |
| 1 | 7055489  | 7099322  | 43.833  |
| 1 | 7349273  | 7410075  | 60.802  |
| 1 | 7463961  | 7482158  | 18.197  |
| 1 | 7576376  | 7615557  | 39.181  |
| 1 | 7945686  | 8117306  | 171.62  |
| 1 | 8221609  | 8341446  | 119.837 |
| 1 | 8349922  | 8493213  | 143.291 |
| 1 | 8642515  | 8649284  | 6.769   |
| 1 | 8670943  | 8797806  | 126.863 |
| 1 | 8894960  | 8980138  | 85.178  |
| 1 | 9029239  | 9029641  | 0.402   |
| 1 | 9031580  | 9133851  | 102.271 |
| 1 | 9133853  | 9404420  | 270.567 |
| 1 | 9499271  | 9572664  | 73.393  |
| 1 | 9629563  | 9680741  | 51.178  |
| 1 | 9689814  | 9720450  | 30.636  |
| 1 | 9720484  | 9722729  | 2.245   |
| 1 | 9722895  | 9895718  | 172.823 |
| 1 | 10391563 | 10455001 | 63.438  |
| 1 | 10459044 | 10462333 | 3.289   |
| 1 | 10462337 | 10552796 | 90.459  |
| 1 | 10562078 | 10675612 | 113.534 |
| 1 | 10696873 | 10723488 | 26.615  |
| 1 | 10735237 | 10737890 | 2.653   |
| 1 | 10746596 | 10780736 | 34.14   |
| 1 | 10900784 | 11862664 | 961.88  |
| 1 | 11862690 | 11946403 | 83.713  |
| 1 | 12122785 | 12285415 | 162.63  |
| 1 | 12311106 | 12327738 | 16.632  |
| 1 | 12378412 | 12379985 | 1.573   |
| 1 | 12395472 | 12396698 | 1.226   |
| 1 | 12440275 | 12440318 | 0.043   |
| 1 | 12475805 | 12514073 | 38.268  |
| 1 | 12549318 | 12740208 | 190.89  |
| 1 | 12884104 | 12963777 | 79.673  |
| 1 | 13057988 | 13078451 | 20.463  |
| 1 | 13079931 | 13125345 | 45.414  |
| 1 | 13138578 | 13159439 | 20.861  |
| 1 | 13163864 | 13201463 | 37.599  |
| 1 | 13204398 | 13298498 | 94.1    |
| 1 | 13307590 | 13321748 | 14.158  |
| 1 | 13325195 | 13699509 | 374.314 |
| 1 | 14026190 | 14178848 | 152.658 |
| 1 | 14196021 | 14313230 | 117.209 |
| 1 | 14455023 | 14702984 | 247.961 |
| 1 | 14875649 | 14914164 | 38.515  |
| 1 | 14946742 | 14968169 | 21.427  |
| 1 | 15048599 | 15167625 | 119.026 |
| 1 | 15204356 | 15206283 | 1.927   |
| 1 | 15216485 | 15376482 | 159.997 |
| 1 | 15396803 | 15522161 | 125.358 |

|   |          |          |          |
|---|----------|----------|----------|
| 1 | 15592192 | 15609998 | 17.806   |
| 1 | 15790370 | 15821399 | 31.029   |
| 1 | 15852130 | 15891890 | 39.76    |
| 1 | 15947856 | 16002995 | 55.139   |
| 1 | 16265533 | 16600567 | 335.034  |
| 1 | 16927317 | 16996681 | 69.364   |
| 1 | 17021205 | 17024132 | 2.927    |
| 1 | 17025465 | 17069445 | 43.98    |
| 1 | 17239028 | 17448144 | 209.116  |
| 1 | 17450968 | 17662003 | 211.035  |
| 1 | 17665438 | 17689814 | 24.376   |
| 1 | 17763635 | 17808025 | 44.39    |
| 1 | 17856178 | 18124718 | 268.54   |
| 1 | 18231300 | 18577434 | 346.134  |
| 1 | 18577436 | 18623380 | 45.944   |
| 1 | 18678259 | 19499071 | 820.812  |
| 1 | 20271554 | 21777538 | 1505.984 |
| 1 | 21777549 | 22560919 | 783.37   |
| 1 | 22560945 | 22652528 | 91.583   |
| 1 | 22724858 | 22724925 | 0.067    |
| 1 | 22775571 | 23406962 | 631.391  |
| 1 | 23576998 | 23702448 | 125.45   |
| 1 | 23715462 | 23912547 | 197.085  |
| 1 | 24235839 | 25172257 | 936.418  |
| 1 | 25695551 | 26317467 | 621.916  |
| 1 | 26482575 | 26804557 | 321.982  |
| 1 | 26995135 | 27073250 | 78.115   |
| 1 | 27088324 | 27088371 | 0.047    |
| 1 | 27194118 | 27394161 | 200.043  |
| 1 | 27638940 | 27824008 | 185.068  |
| 1 | 27882715 | 27985611 | 102.896  |
| 1 | 28303225 | 28616444 | 313.219  |
| 1 | 28880746 | 29153725 | 272.979  |
| 1 | 29155131 | 29261952 | 106.821  |
| 1 | 29892863 | 30789075 | 896.212  |
| 1 | 31252104 | 31308185 | 56.081   |
| 1 | 31358032 | 31470973 | 112.941  |
| 1 | 31547347 | 32300133 | 752.786  |
| 1 | 32310901 | 32517213 | 206.312  |
| 1 | 32606197 | 32660640 | 54.443   |
| 1 | 32783429 | 33336803 | 553.374  |
| 1 | 33413738 | 33514655 | 100.917  |
| 1 | 33525804 | 34197008 | 671.204  |
| 1 | 34638700 | 34973772 | 335.072  |
| 1 | 37831362 | 38895323 | 1063.961 |
| 1 | 41637618 | 42555886 | 918.268  |
| 1 | 44188267 | 44425767 | 237.5    |
| 1 | 44432028 | 44432193 | 0.165    |
| 1 | 44532023 | 45204449 | 672.426  |
| 1 | 45206664 | 45274054 | 67.39    |
| 1 | 45274075 | 45274079 | 0.004    |
| 1 | 45274094 | 45274212 | 0.118    |
| 1 | 45420356 | 45674953 | 254.597  |
| 1 | 45708169 | 46071894 | 363.725  |
| 1 | 46590229 | 47344693 | 754.464  |
| 1 | 48473307 | 49550895 | 1077.588 |
| 1 | 49734874 | 51522878 | 1788.004 |
| 1 | 51598475 | 51754062 | 155.587  |
| 1 | 51804450 | 52060961 | 256.511  |
| 1 | 52238284 | 52280602 | 42.318   |
| 1 | 52396487 | 52782179 | 385.692  |

|   |          |          |          |
|---|----------|----------|----------|
| 1 | 52789526 | 52815476 | 25.95    |
| 1 | 52956245 | 52985290 | 29.045   |
| 1 | 53027489 | 53206200 | 178.711  |
| 1 | 53445549 | 53587969 | 142.42   |
| 1 | 53636847 | 53638058 | 1.211    |
| 1 | 53745267 | 53761065 | 15.798   |
| 1 | 53864164 | 54395286 | 531.122  |
| 1 | 54497484 | 54543528 | 46.044   |
| 1 | 54690984 | 54723280 | 32.296   |
| 1 | 54723283 | 54907178 | 183.895  |
| 1 | 55088807 | 55158431 | 69.624   |
| 1 | 55167863 | 55296960 | 129.097  |
| 1 | 55317996 | 55399717 | 81.721   |
| 1 | 55409307 | 55498620 | 89.313   |
| 1 | 55498628 | 55502282 | 3.654    |
| 1 | 55605441 | 56397836 | 792.395  |
| 1 | 56881048 | 57551220 | 670.172  |
| 1 | 57584654 | 58169305 | 584.651  |
| 1 | 58419631 | 58419658 | 0.027    |
| 1 | 58698783 | 58902442 | 203.659  |
| 1 | 58924511 | 59446816 | 522.305  |
| 1 | 59506984 | 59624701 | 117.717  |
| 1 | 59902365 | 60024445 | 122.08   |
| 1 | 60583899 | 60605810 | 21.911   |
| 1 | 60695508 | 61213147 | 517.639  |
| 1 | 61228730 | 61250458 | 21.728   |
| 1 | 61251044 | 61341001 | 89.957   |
| 1 | 61378927 | 61477030 | 98.103   |
| 1 | 61479609 | 61497441 | 17.832   |
| 1 | 61498032 | 62095310 | 597.278  |
| 1 | 62206350 | 63502118 | 1295.768 |
| 1 | 66240678 | 66815641 | 574.963  |
| 1 | 66836220 | 67305992 | 469.772  |
| 1 | 67520854 | 68735149 | 1214.295 |
| 1 | 69248237 | 69347618 | 99.381   |
| 1 | 69515421 | 69570988 | 55.567   |
| 1 | 69808776 | 70241441 | 432.665  |
| 1 | 72897392 | 74386955 | 1489.563 |
| 1 | 74386957 | 74813800 | 426.843  |
| 1 | 75156162 | 75156186 | 0.024    |
| 1 | 75278276 | 75508461 | 230.185  |
| 1 | 75711416 | 75961438 | 250.022  |
| 1 | 76067510 | 76266511 | 199.001  |
| 1 | 76646987 | 76712605 | 65.618   |
| 1 | 76817211 | 77122546 | 305.335  |
| 1 | 77180466 | 77228441 | 47.975   |
| 1 | 77349527 | 77451095 | 101.568  |
| 1 | 77541349 | 77635205 | 93.856   |
| 1 | 77761325 | 77841109 | 79.784   |
| 1 | 77853010 | 78195443 | 342.433  |
| 1 | 78202594 | 78362229 | 159.635  |
| 1 | 78364742 | 78383554 | 18.812   |
| 1 | 78419682 | 78509750 | 90.068   |
| 1 | 79397265 | 79511218 | 113.953  |
| 1 | 79616295 | 79663520 | 47.225   |
| 1 | 79707233 | 79890221 | 182.988  |
| 1 | 80066017 | 80559570 | 493.553  |
| 1 | 80568017 | 80595015 | 26.998   |
| 1 | 81078893 | 81226150 | 147.257  |
| 1 | 81236846 | 81239521 | 2.675    |
| 1 | 81361279 | 81690457 | 329.178  |

|   |           |           |          |
|---|-----------|-----------|----------|
| 1 | 82216194  | 82267900  | 51.706   |
| 1 | 82339394  | 82339404  | 0.01     |
| 1 | 82367294  | 82768747  | 401.453  |
| 1 | 82768776  | 83800163  | 1031.387 |
| 1 | 85227873  | 85556553  | 328.68   |
| 1 | 85812111  | 86288340  | 476.229  |
| 1 | 86787749  | 87275877  | 488.128  |
| 1 | 88047146  | 88092554  | 45.408   |
| 1 | 88557699  | 88803559  | 245.86   |
| 1 | 88813881  | 89655954  | 842.073  |
| 1 | 90589040  | 90720986  | 131.946  |
| 1 | 91565218  | 91739902  | 174.684  |
| 1 | 91758806  | 91892198  | 133.392  |
| 1 | 91892232  | 93299069  | 1406.837 |
| 1 | 93342879  | 93778755  | 435.876  |
| 1 | 94219533  | 94387621  | 168.088  |
| 1 | 94578246  | 94578261  | 0.015    |
| 1 | 94578265  | 94578282  | 0.017    |
| 1 | 94578313  | 94578332  | 0.019    |
| 1 | 94578359  | 94578381  | 0.022    |
| 1 | 94578490  | 94578550  | 0.06     |
| 1 | 94578603  | 94578834  | 0.231    |
| 1 | 94578885  | 94578925  | 0.04     |
| 1 | 94578945  | 94578979  | 0.034    |
| 1 | 94578981  | 94578992  | 0.011    |
| 1 | 94579009  | 94579035  | 0.026    |
| 1 | 94579165  | 94579198  | 0.033    |
| 1 | 94579405  | 94579604  | 0.199    |
| 1 | 94580136  | 94580172  | 0.036    |
| 1 | 94580231  | 94580287  | 0.056    |
| 1 | 94580322  | 94580345  | 0.023    |
| 1 | 94580599  | 94580795  | 0.196    |
| 1 | 94580803  | 94580815  | 0.012    |
| 1 | 94580887  | 94580890  | 0.003    |
| 1 | 94619112  | 94834746  | 215.634  |
| 1 | 95038757  | 95060015  | 21.258   |
| 1 | 95381534  | 95495852  | 114.318  |
| 1 | 97055394  | 97664299  | 608.905  |
| 1 | 97928482  | 98030378  | 101.896  |
| 1 | 98050450  | 98111254  | 60.804   |
| 1 | 98118262  | 98262489  | 144.227  |
| 1 | 98297906  | 98754023  | 456.117  |
| 1 | 98892631  | 98980523  | 87.892   |
| 1 | 99070393  | 99102895  | 32.502   |
| 1 | 99112355  | 99115900  | 3.545    |
| 1 | 99170267  | 99704308  | 534.041  |
| 1 | 99743076  | 99885780  | 142.704  |
| 1 | 99885804  | 99970356  | 84.552   |
| 1 | 99980033  | 100112296 | 132.263  |
| 1 | 100135493 | 100232706 | 97.213   |
| 1 | 100322805 | 100368587 | 45.782   |
| 1 | 100433402 | 100480194 | 46.792   |
| 1 | 100480236 | 100577977 | 97.741   |
| 1 | 100600329 | 100615522 | 15.193   |
| 1 | 100668832 | 100790639 | 121.807  |
| 1 | 100810527 | 100858828 | 48.301   |
| 1 | 100890129 | 100903951 | 13.822   |
| 1 | 101035483 | 101122502 | 87.019   |
| 1 | 101197981 | 101330801 | 132.82   |
| 1 | 101433868 | 101480775 | 46.907   |
| 1 | 101502562 | 101502569 | 0.007    |

|   |           |           |          |
|---|-----------|-----------|----------|
| 1 | 101521749 | 101583561 | 61.812   |
| 1 | 101627677 | 101697356 | 69.679   |
| 1 | 101735905 | 101766771 | 30.866   |
| 1 | 101835493 | 102409572 | 574.079  |
| 1 | 102462839 | 102512905 | 50.066   |
| 1 | 102627665 | 102627690 | 0.025    |
| 1 | 102627705 | 102668667 | 40.962   |
| 1 | 102936327 | 103075916 | 139.589  |
| 1 | 103098785 | 103156257 | 57.472   |
| 1 | 103362771 | 104394628 | 1031.857 |
| 1 | 106298354 | 108535252 | 2236.898 |
| 1 | 108620282 | 109520364 | 900.082  |
| 1 | 109552043 | 109621407 | 69.364   |
| 1 | 109643821 | 109672846 | 29.025   |
| 1 | 109705654 | 109781311 | 75.657   |
| 1 | 109875321 | 109889796 | 14.475   |
| 1 | 109960899 | 110017581 | 56.682   |
| 1 | 110052857 | 110093752 | 40.895   |
| 1 | 110113951 | 110194086 | 80.135   |
| 1 | 110194691 | 110360471 | 165.78   |
| 1 | 110397767 | 110425037 | 27.27    |
| 1 | 110511780 | 111461546 | 949.766  |
| 1 | 111469291 | 111638658 | 169.367  |
| 1 | 111957461 | 112416685 | 459.224  |
| 1 | 112466181 | 112966804 | 500.623  |
| 1 | 112987606 | 113007217 | 19.611   |
| 1 | 113007224 | 113768446 | 761.222  |
| 1 | 114161079 | 114302905 | 141.826  |
| 1 | 114338364 | 114473647 | 135.283  |
| 1 | 114485287 | 115475594 | 990.307  |
| 1 | 117318371 | 118242754 | 924.383  |
| 1 | 118257848 | 119917450 | 1659.602 |
| 1 | 122107468 | 124295136 | 2187.668 |
| 1 | 124360644 | 124400958 | 40.314   |
| 1 | 124443484 | 124443503 | 0.019    |
| 1 | 124540909 | 124554746 | 13.837   |
| 1 | 124572686 | 125690952 | 1118.266 |
| 1 | 126144370 | 127943772 | 1799.402 |
| 1 | 127943787 | 128744087 | 800.3    |
| 1 | 129544412 | 131794937 | 2250.525 |
| 1 | 131936484 | 133472845 | 1536.361 |
| 1 | 134277675 | 135043964 | 766.289  |
| 1 | 135044146 | 135194035 | 149.889  |
| 1 | 135273530 | 135388064 | 114.534  |
| 1 | 135459826 | 135513859 | 54.033   |
| 1 | 135517569 | 135829775 | 312.206  |
| 1 | 135832537 | 135933065 | 100.528  |
| 1 | 136223073 | 136224755 | 1.682    |
| 1 | 136224771 | 136947569 | 722.798  |
| 1 | 137076182 | 137597793 | 521.611  |
| 1 | 137606704 | 137634570 | 27.866   |
| 1 | 137669273 | 138245613 | 576.34   |
| 1 | 138268635 | 138428724 | 160.089  |
| 1 | 138430324 | 138430333 | 0.009    |
| 1 | 138585145 | 139688676 | 1103.531 |
| 1 | 143041738 | 144075649 | 1033.911 |
| 1 | 144817132 | 145296009 | 478.877  |
| 1 | 145312914 | 145538594 | 225.68   |
| 1 | 145855989 | 146509743 | 653.754  |
| 1 | 146610481 | 146948138 | 337.657  |
| 1 | 146948142 | 147082356 | 134.214  |

|   |           |           |          |
|---|-----------|-----------|----------|
| 1 | 147154553 | 147381640 | 227.087  |
| 1 | 147385544 | 147544071 | 158.527  |
| 1 | 147544078 | 148144128 | 600.05   |
| 1 | 148254840 | 148360235 | 105.395  |
| 1 | 148455197 | 149063378 | 608.181  |
| 1 | 149079603 | 149110974 | 31.371   |
| 1 | 149239637 | 149455344 | 215.707  |
| 1 | 149515611 | 149612272 | 96.661   |
| 1 | 149612405 | 149612570 | 0.165    |
| 1 | 149623539 | 150609602 | 986.063  |
| 1 | 150689151 | 150895605 | 206.454  |
| 1 | 150897392 | 151097837 | 200.445  |
| 1 | 151253405 | 151702536 | 449.131  |
| 1 | 151879919 | 151982900 | 102.981  |
| 1 | 152024592 | 153058643 | 1034.051 |
| 1 | 153148417 | 153262992 | 114.575  |
| 1 | 153403438 | 153496883 | 93.445   |
| 1 | 153533256 | 153797605 | 264.349  |
| 1 | 153916919 | 153935994 | 19.075   |
| 1 | 153948251 | 154134085 | 185.834  |
| 1 | 154311019 | 154354598 | 43.579   |
| 1 | 154439679 | 154454355 | 14.676   |
| 1 | 154513221 | 154631152 | 117.931  |
| 1 | 154646442 | 154648464 | 2.022    |
| 1 | 154657332 | 154738620 | 81.288   |
| 1 | 154892952 | 154913679 | 20.727   |
| 1 | 154913763 | 154926571 | 12.808   |
| 1 | 154942125 | 154961164 | 19.039   |
| 1 | 154989505 | 155069556 | 80.051   |
| 1 | 155113952 | 155130620 | 16.668   |
| 1 | 155134654 | 155235633 | 100.979  |
| 1 | 155281002 | 155317172 | 36.17    |
| 1 | 155317336 | 155325952 | 8.616    |
| 1 | 155348916 | 155479086 | 130.17   |
| 1 | 155479212 | 155682803 | 203.591  |
| 1 | 155751784 | 155805720 | 53.936   |
| 1 | 155954782 | 156184253 | 229.471  |
| 1 | 156237362 | 156548497 | 311.135  |
| 1 | 156639489 | 157042367 | 402.878  |
| 1 | 157043497 | 157216277 | 172.78   |
| 1 | 157234651 | 157252406 | 17.755   |
| 1 | 157342125 | 157395972 | 53.847   |
| 1 | 157398853 | 157712168 | 313.315  |
| 1 | 157853773 | 159624546 | 1770.773 |
| 1 | 161032718 | 161709321 | 676.603  |
| 1 | 162301410 | 164845084 | 2543.674 |
| 1 | 164922496 | 165297520 | 375.024  |
| 1 | 165326779 | 165402787 | 76.008   |
| 1 | 165451843 | 165875241 | 423.398  |
| 1 | 165937848 | 166192973 | 255.125  |
| 1 | 166414749 | 167425592 | 1010.843 |
| 1 | 167526172 | 168669803 | 1143.631 |
| 1 | 168873794 | 169138994 | 265.2    |
| 1 | 169202362 | 169392201 | 189.839  |
| 1 | 169456924 | 170049877 | 592.953  |
| 1 | 170095693 | 170129942 | 34.249   |
| 1 | 170159320 | 170162451 | 3.131    |
| 1 | 170162482 | 170966650 | 804.168  |
| 1 | 171162703 | 171241471 | 78.768   |
| 1 | 171253437 | 171253454 | 0.017    |
| 1 | 171266179 | 171280664 | 14.485   |

|   |           |           |          |
|---|-----------|-----------|----------|
| 1 | 171402958 | 171707709 | 304.751  |
| 1 | 171740637 | 171791339 | 50.702   |
| 1 | 171840121 | 171855177 | 15.056   |
| 1 | 171940728 | 171981609 | 40.881   |
| 1 | 171991659 | 172150276 | 158.617  |
| 1 | 172232128 | 172239575 | 7.447    |
| 1 | 172249632 | 172360561 | 110.929  |
| 1 | 172370986 | 173075640 | 704.654  |
| 1 | 173254825 | 173492075 | 237.25   |
| 1 | 173492093 | 173916291 | 424.198  |
| 1 | 173918677 | 173923478 | 4.801    |
| 1 | 174414134 | 174459969 | 45.835   |
| 1 | 174472713 | 174472816 | 0.103    |
| 1 | 174574520 | 174734875 | 160.355  |
| 1 | 174734883 | 174754138 | 19.255   |
| 1 | 174791699 | 174906111 | 114.412  |
| 1 | 174935488 | 174967653 | 32.165   |
| 1 | 175014788 | 175149972 | 135.184  |
| 1 | 175160821 | 175175263 | 14.442   |
| 1 | 175219659 | 175219669 | 0.01     |
| 1 | 175255662 | 175432604 | 176.942  |
| 1 | 175488151 | 175492396 | 4.245    |
| 1 | 175496050 | 175751298 | 255.248  |
| 1 | 175795866 | 175879749 | 83.883   |
| 1 | 176024882 | 176191410 | 166.528  |
| 1 | 176197331 | 176197370 | 0.039    |
| 1 | 176272903 | 176996660 | 723.757  |
| 1 | 176996685 | 180925237 | 3928.552 |
| 1 | 181881591 | 184114937 | 2233.346 |
| 1 | 184442147 | 186687717 | 2245.57  |
| 1 | 187109525 | 187512586 | 403.061  |
| 1 | 188089549 | 188958344 | 868.795  |
| 1 | 188961517 | 189174503 | 212.986  |
| 1 | 190048122 | 191114486 | 1066.364 |
| 1 | 191434776 | 192681651 | 1246.875 |
| 1 | 193267739 | 193302862 | 35.123   |
| 1 | 193628211 | 194946217 | 1318.006 |
| 1 | 198500219 | 199735356 | 1235.137 |
| 1 | 199881508 | 199934430 | 52.922   |
| 1 | 200196477 | 200208163 | 11.686   |
| 1 | 200223492 | 200272616 | 49.124   |
| 1 | 200308780 | 200347665 | 38.885   |
| 1 | 200347672 | 200520156 | 172.484  |
| 1 | 200529770 | 200556231 | 26.461   |
| 1 | 200556242 | 200569999 | 13.757   |
| 1 | 200617358 | 200631380 | 14.022   |
| 1 | 200638505 | 200695893 | 57.388   |
| 1 | 200702046 | 200954379 | 252.333  |
| 1 | 201157482 | 202257832 | 1100.35  |
| 1 | 202265540 | 202406578 | 141.038  |
| 1 | 202606072 | 203879848 | 1273.776 |
| 1 | 208048339 | 209517271 | 1468.932 |
| 1 | 209530900 | 210065184 | 534.284  |
| 1 | 210726978 | 211784430 | 1057.452 |
| 1 | 212215237 | 212508595 | 293.358  |
| 1 | 212626118 | 212834745 | 208.627  |
| 1 | 212907919 | 213266204 | 358.285  |
| 1 | 213388299 | 213445886 | 57.587   |
| 1 | 213547198 | 213886612 | 339.414  |
| 1 | 214015014 | 214099276 | 84.262   |
| 1 | 214123287 | 215003457 | 880.17   |



|   |           |           |          |
|---|-----------|-----------|----------|
| 1 | 218958415 | 222846634 | 3888.219 |
| 1 | 226502715 | 227403725 | 901.01   |
| 1 | 227525146 | 227527388 | 2.242    |
| 1 | 227676004 | 228043546 | 367.542  |
| 1 | 228179800 | 228313837 | 134.037  |
| 1 | 228377963 | 229984450 | 1606.487 |
| 1 | 231379336 | 232115914 | 736.578  |
| 1 | 232257712 | 232495842 | 238.13   |
| 1 | 232720094 | 232952387 | 232.293  |
| 1 | 232952568 | 232988089 | 35.521   |
| 1 | 232992851 | 233568254 | 575.403  |
| 1 | 233878578 | 235058776 | 1180.198 |
| 1 | 235505535 | 236554200 | 1048.665 |
| 1 | 237283408 | 238646533 | 1363.125 |
| 1 | 241960372 | 243304301 | 1343.929 |
| 1 | 243308682 | 243641317 | 332.635  |
| 1 | 243733981 | 243743576 | 9.595    |
| 1 | 243833851 | 243937658 | 103.807  |
| 1 | 243968438 | 246244796 | 2276.358 |
| 1 | 246244802 | 247012699 | 767.897  |
| 1 | 247022840 | 247530988 | 508.148  |
| 1 | 247601659 | 247863928 | 262.269  |
| 1 | 248060962 | 248841642 | 780.68   |
| 1 | 248928177 | 248928183 | 0.006    |
| 1 | 248950441 | 249025834 | 75.393   |
| 1 | 249141046 | 249575055 | 434.009  |
| 1 | 249586188 | 249588281 | 2.093    |
| 1 | 249751104 | 249828860 | 77.756   |
| 1 | 249908096 | 249924528 | 16.432   |
| 1 | 249980936 | 250158912 | 177.976  |
| 1 | 250230937 | 250265021 | 34.084   |
| 1 | 250267188 | 250389794 | 122.606  |
| 1 | 250680327 | 250934198 | 253.871  |
| 1 | 251033516 | 251140267 | 106.751  |
| 1 | 251294676 | 251590498 | 295.822  |
| 1 | 251636907 | 251636938 | 0.031    |
| 1 | 251655412 | 251737410 | 81.998   |
| 1 | 251770756 | 251778641 | 7.885    |
| 1 | 251852202 | 251890697 | 38.495   |
| 1 | 251942708 | 252230382 | 287.674  |
| 1 | 252230385 | 252319887 | 89.502   |
| 1 | 252319911 | 252364930 | 45.019   |
| 1 | 252376782 | 252383614 | 6.832    |
| 1 | 252530640 | 253703945 | 1173.305 |
| 1 | 253882372 | 253975150 | 92.778   |
| 1 | 254009193 | 254493787 | 484.594  |
| 1 | 254514929 | 254561117 | 46.188   |
| 1 | 254670171 | 254670179 | 0.008    |
| 1 | 254670708 | 254767337 | 96.629   |
| 1 | 254814854 | 254872425 | 57.571   |
| 1 | 254896916 | 254910617 | 13.701   |
| 1 | 254915904 | 254924703 | 8.799    |
| 1 | 254936339 | 255760952 | 824.613  |
| 1 | 257162170 | 257354380 | 192.21   |
| 1 | 257431675 | 258137148 | 705.473  |
| 1 | 258152761 | 259268585 | 1115.824 |
| 1 | 260071081 | 260824564 | 753.483  |
| 1 | 261117406 | 261120005 | 2.599    |
| 1 | 261120018 | 261120555 | 0.537    |
| 1 | 261131561 | 261134457 | 2.896    |
| 1 | 261134482 | 261668858 | 534.376  |

|   |           |           |         |
|---|-----------|-----------|---------|
| 1 | 261670687 | 261721831 | 51.144  |
| 1 | 261721978 | 261773366 | 51.388  |
| 1 | 261911422 | 262172000 | 260.578 |
| 1 | 262255089 | 262284406 | 29.317  |
| 1 | 262323504 | 262464328 | 140.824 |
| 1 | 262535863 | 262605012 | 69.149  |
| 1 | 262637284 | 262910150 | 272.866 |
| 1 | 263035683 | 263204834 | 169.151 |
| 1 | 263302437 | 263361719 | 59.282  |
| 1 | 263436387 | 263449662 | 13.275  |
| 1 | 263608922 | 263664079 | 55.157  |
| 1 | 263695245 | 263808822 | 113.577 |
| 1 | 263838121 | 263863652 | 25.531  |
| 1 | 263907729 | 263922342 | 14.613  |
| 1 | 263933972 | 263950850 | 16.878  |
| 1 | 264327165 | 264719570 | 392.405 |
| 1 | 264797465 | 264975612 | 178.147 |
| 1 | 264975658 | 264988818 | 13.16   |
| 1 | 265063188 | 265212930 | 149.742 |
| 1 | 265216068 | 265430762 | 214.694 |
| 1 | 265439134 | 265552940 | 113.806 |
| 1 | 265598771 | 265598827 | 0.056   |
| 1 | 265636702 | 265661739 | 25.037  |
| 1 | 265680425 | 265680589 | 0.164   |
| 1 | 265701805 | 265911762 | 209.957 |
| 1 | 266112007 | 266314780 | 202.773 |
| 1 | 266395387 | 266537220 | 141.833 |
| 1 | 266539526 | 266569480 | 29.954  |
| 1 | 266680744 | 266881379 | 200.635 |
| 1 | 266895189 | 266921800 | 26.611  |
| 1 | 266922650 | 266922665 | 0.015   |
| 1 | 266955832 | 266955954 | 0.122   |
| 1 | 266987577 | 267228478 | 240.901 |
| 1 | 267228504 | 267613595 | 385.091 |
| 1 | 267640210 | 267644551 | 4.341   |
| 1 | 267685001 | 267685052 | 0.051   |
| 1 | 267698871 | 267738214 | 39.343  |
| 1 | 267745670 | 267745686 | 0.016   |
| 1 | 267761275 | 267767320 | 6.045   |
| 1 | 267772391 | 267787474 | 15.083  |
| 1 | 267790589 | 267857751 | 67.162  |
| 1 | 267865530 | 267868917 | 3.387   |
| 1 | 267893850 | 267909291 | 15.441  |
| 1 | 267912471 | 267930764 | 18.293  |
| 1 | 267945362 | 267952899 | 7.537   |
| 1 | 267953843 | 268011740 | 57.897  |
| 1 | 268011787 | 268015172 | 3.385   |
| 1 | 268098091 | 268098398 | 0.307   |
| 1 | 268122792 | 268404291 | 281.499 |
| 1 | 268453406 | 268638085 | 184.679 |
| 1 | 268678732 | 268689770 | 11.038  |
| 1 | 268978426 | 269064864 | 86.438  |
| 1 | 269072727 | 269072959 | 0.232   |
| 1 | 269112012 | 269641306 | 529.294 |
| 1 | 269646420 | 270133430 | 487.01  |
| 1 | 270176707 | 270249574 | 72.867  |
| 1 | 270250367 | 270261409 | 11.042  |
| 1 | 270278512 | 270338665 | 60.153  |
| 1 | 270362047 | 270441634 | 79.587  |
| 1 | 270477393 | 270535285 | 57.892  |
| 1 | 270560871 | 270560915 | 0.044   |

|   |           |           |         |
|---|-----------|-----------|---------|
| 1 | 270561257 | 270589339 | 28.082  |
| 1 | 270596605 | 270639980 | 43.375  |
| 1 | 270639990 | 270660234 | 20.244  |
| 1 | 270660240 | 270667678 | 7.438   |
| 1 | 270672613 | 270735530 | 62.917  |
| 1 | 270876319 | 271028292 | 151.973 |
| 1 | 271260231 | 271665470 | 405.239 |
| 1 | 271804331 | 272397762 | 593.431 |
| 1 | 272397765 | 272525181 | 127.416 |
| 1 | 272840754 | 272970488 | 129.734 |
| 1 | 273004074 | 273038808 | 34.734  |
| 1 | 273139445 | 273631724 | 492.279 |
| 1 | 273688165 | 273716237 | 28.072  |
| 1 | 273782687 | 273862718 | 80.031  |
| 1 | 273997963 | 274184792 | 186.829 |
| 1 | 274412340 | 274529240 | 116.9   |
| 1 | 274529270 | 274846709 | 317.439 |
| 1 | 274860906 | 274870329 | 9.423   |
| 1 | 274967292 | 275058393 | 91.101  |
| 1 | 275112851 | 275146472 | 33.621  |
| 1 | 275165284 | 275207080 | 41.796  |
| 1 | 275215038 | 275235514 | 20.476  |
| 1 | 275263941 | 275281020 | 17.079  |
| 1 | 275510714 | 275512618 | 1.904   |
| 1 | 275543734 | 275575589 | 31.855  |
| 1 | 275640023 | 275644564 | 4.541   |
| 1 | 275647642 | 275785178 | 137.536 |
| 1 | 275785324 | 275842760 | 57.436  |
| 1 | 275905256 | 275952447 | 47.191  |
| 1 | 275952450 | 276231171 | 278.721 |
| 1 | 276242866 | 276242901 | 0.035   |
| 1 | 276248398 | 276328312 | 79.914  |
| 1 | 276472495 | 276472667 | 0.172   |
| 1 | 276472672 | 276481414 | 8.742   |
| 1 | 276481420 | 276481438 | 0.018   |
| 1 | 276649722 | 276649744 | 0.022   |
| 1 | 276651793 | 276651801 | 0.008   |
| 1 | 276653130 | 276653538 | 0.408   |
| 1 | 276665713 | 276665770 | 0.057   |
| 1 | 276709555 | 276709581 | 0.026   |
| 1 | 276727642 | 276738803 | 11.161  |
| 1 | 276738820 | 276740411 | 1.591   |
| 1 | 276751151 | 276751160 | 0.009   |
| 1 | 276855427 | 276857517 | 2.09    |
| 1 | 277013409 | 277033335 | 19.926  |
| 1 | 277073672 | 277078740 | 5.068   |
| 1 | 277118214 | 277122427 | 4.213   |
| 1 | 277191888 | 277216655 | 24.767  |
| 1 | 277223659 | 277250101 | 26.442  |
| 1 | 277252177 | 277252349 | 0.172   |
| 1 | 277268041 | 277268795 | 0.754   |
| 1 | 277287448 | 277287454 | 0.006   |
| 1 | 277291553 | 277302751 | 11.198  |
| 1 | 277315427 | 277323657 | 8.23    |
| 1 | 277449887 | 277450014 | 0.127   |
| 1 | 277616277 | 277658876 | 42.599  |
| 1 | 277747656 | 277755432 | 7.776   |
| 1 | 277790338 | 277790347 | 0.009   |
| 1 | 277809710 | 277844050 | 34.34   |
| 1 | 277844073 | 277867590 | 23.517  |
| 1 | 277891872 | 277891902 | 0.03    |

|   |           |           |         |
|---|-----------|-----------|---------|
| 1 | 277912554 | 277912559 | 0.005   |
| 1 | 277912565 | 277933301 | 20.736  |
| 1 | 278121420 | 278287364 | 165.944 |
| 1 | 278364718 | 278375739 | 11.021  |
| 1 | 278386981 | 278392830 | 5.849   |
| 1 | 278392861 | 278408690 | 15.829  |
| 1 | 278411392 | 278411402 | 0.01    |
| 1 | 278427456 | 278807870 | 380.414 |
| 1 | 278819215 | 278835422 | 16.207  |
| 1 | 278960889 | 278963898 | 3.009   |
| 1 | 279127342 | 279660583 | 533.241 |
| 1 | 279666724 | 279666957 | 0.233   |
| 1 | 279762903 | 279786761 | 23.858  |
| 1 | 279944786 | 280466505 | 521.719 |
| 1 | 280480717 | 280904376 | 423.659 |
| 1 | 280904492 | 280921117 | 16.625  |
| 1 | 281127634 | 281488665 | 361.031 |
| 1 | 281572280 | 281594078 | 21.798  |
| 1 | 281612092 | 281633171 | 21.079  |
| 1 | 281658211 | 281849939 | 191.728 |
| 1 | 281854009 | 281966803 | 112.794 |
| 1 | 281978943 | 282086299 | 107.356 |
| 1 | 282095695 | 282109821 | 14.126  |
| 1 | 282151757 | 282314185 | 162.428 |
| 1 | 282314709 | 282316544 | 1.835   |
| 1 | 282324883 | 282365921 | 41.038  |
| 1 | 282368460 | 282621654 | 253.194 |
| 1 | 282621670 | 282847367 | 225.697 |
| 1 | 282847380 | 282893749 | 46.369  |
| 1 | 282904852 | 283229622 | 324.77  |
| 1 | 283243815 | 283289083 | 45.268  |
| 1 | 283327536 | 283467638 | 140.102 |
| 1 | 283467668 | 283471886 | 4.218   |
| 1 | 283503821 | 283674699 | 170.878 |
| 1 | 283674730 | 283684356 | 9.626   |
| 1 | 283757142 | 283801338 | 44.196  |
| 1 | 283801344 | 283802563 | 1.219   |
| 1 | 283802708 | 283841246 | 38.538  |
| 1 | 283855969 | 283870584 | 14.615  |
| 1 | 283886210 | 283890548 | 4.338   |
| 1 | 283890996 | 284013613 | 122.617 |
| 1 | 284030927 | 284065414 | 34.487  |
| 1 | 284083933 | 284099300 | 15.367  |
| 1 | 284099916 | 284105798 | 5.882   |
| 1 | 284116039 | 284117234 | 1.195   |
| 1 | 284117261 | 284218102 | 100.841 |
| 1 | 284220851 | 284254575 | 33.724  |
| 1 | 284259034 | 284269146 | 10.112  |
| 1 | 284269498 | 284275082 | 5.584   |
| 1 | 284275153 | 284333675 | 58.522  |
| 1 | 284333889 | 284393852 | 59.963  |
| 1 | 284393907 | 284440281 | 46.374  |
| 1 | 284457027 | 284558291 | 101.264 |
| 1 | 284571967 | 284592873 | 20.906  |
| 1 | 284593027 | 285259123 | 666.096 |
| 1 | 285277118 | 285308029 | 30.911  |
| 1 | 285324596 | 285332120 | 7.524   |
| 1 | 285332135 | 285430364 | 98.229  |
| 1 | 285527856 | 285527868 | 0.012   |
| 1 | 285527873 | 285624339 | 96.466  |
| 1 | 285641107 | 285643442 | 2.335   |

|   |           |           |         |
|---|-----------|-----------|---------|
| 1 | 285679946 | 285935852 | 255.906 |
| 1 | 286004026 | 286042453 | 38.427  |
| 1 | 286094329 | 286311494 | 217.165 |
| 1 | 286311623 | 286410839 | 99.216  |
| 1 | 286476646 | 286518959 | 42.313  |
| 1 | 286548334 | 286554102 | 5.768   |
| 1 | 286723190 | 286769290 | 46.1    |
| 1 | 286775128 | 286786746 | 11.618  |
| 1 | 286786945 | 286791125 | 4.18    |
| 1 | 286828222 | 287225548 | 397.326 |
| 1 | 287225561 | 287645003 | 419.442 |
| 1 | 287645099 | 287912219 | 267.12  |
| 1 | 287932609 | 287942777 | 10.168  |
| 1 | 288120417 | 288222299 | 101.882 |
| 1 | 288238622 | 288327409 | 88.787  |
| 1 | 288355186 | 288377168 | 21.982  |
| 1 | 288401367 | 288401492 | 0.125   |
| 1 | 288430694 | 288430906 | 0.212   |
| 1 | 288430913 | 288430925 | 0.012   |
| 1 | 288443279 | 288450192 | 6.913   |
| 1 | 288460780 | 288460952 | 0.172   |
| 1 | 288473558 | 288492114 | 18.556  |
| 1 | 288500600 | 288571461 | 70.861  |
| 1 | 288588048 | 288640108 | 52.06   |
| 1 | 288705772 | 288807725 | 101.953 |
| 1 | 288815236 | 288830847 | 15.611  |
| 1 | 288862075 | 288945451 | 83.376  |
| 1 | 288945463 | 289089537 | 144.074 |
| 1 | 289094534 | 289135854 | 41.32   |
| 1 | 289135923 | 289187951 | 52.028  |
| 1 | 289209504 | 289223998 | 14.494  |
| 1 | 289225039 | 289356177 | 131.138 |
| 1 | 289432837 | 289450503 | 17.666  |
| 1 | 289486040 | 289486470 | 0.43    |
| 1 | 289612557 | 289632824 | 20.267  |
| 1 | 289665016 | 289727873 | 62.857  |
| 1 | 289745464 | 289752980 | 7.516   |
| 1 | 289763050 | 289768489 | 5.439   |
| 1 | 289782239 | 289862756 | 80.517  |
| 1 | 289862788 | 289862823 | 0.035   |
| 1 | 289862847 | 289862855 | 0.008   |
| 1 | 289862899 | 289862912 | 0.013   |
| 1 | 289862929 | 289863855 | 0.926   |
| 1 | 289912790 | 289925954 | 13.164  |
| 1 | 289976757 | 289984845 | 8.088   |
| 1 | 290013011 | 290017840 | 4.829   |
| 1 | 290017877 | 290017879 | 0.002   |
| 1 | 290098814 | 290098842 | 0.028   |
| 1 | 290098858 | 290098985 | 0.127   |
| 1 | 290260877 | 290548757 | 287.88  |
| 1 | 290589976 | 290791573 | 201.597 |
| 1 | 290827514 | 290944758 | 117.244 |
| 1 | 290947633 | 290975729 | 28.096  |
| 1 | 291047497 | 291092471 | 44.974  |
| 1 | 291108389 | 291217765 | 109.376 |
| 1 | 291217769 | 291218696 | 0.927   |
| 1 | 291223434 | 291224142 | 0.708   |
| 1 | 291226390 | 291378443 | 152.053 |
| 1 | 291396842 | 291396958 | 0.116   |
| 1 | 291397091 | 291397109 | 0.018   |
| 1 | 291539795 | 291843089 | 303.294 |

|   |           |           |         |
|---|-----------|-----------|---------|
| 1 | 291867545 | 291991078 | 123.533 |
| 1 | 292028010 | 292217606 | 189.596 |
| 1 | 292252344 | 292330914 | 78.57   |
| 1 | 292333242 | 292345469 | 12.227  |
| 1 | 292415993 | 292420768 | 4.775   |
| 1 | 292420794 | 292515918 | 95.124  |
| 1 | 292784321 | 292868535 | 84.214  |
| 1 | 292868540 | 292868584 | 0.044   |
| 1 | 293306191 | 293519394 | 213.203 |
| 1 | 293519439 | 293519469 | 0.03    |
| 1 | 293519551 | 293519588 | 0.037   |
| 1 | 293519940 | 293524141 | 4.201   |
| 1 | 293545257 | 293545436 | 0.179   |
| 1 | 293547447 | 293547452 | 0.005   |
| 1 | 293555112 | 293555132 | 0.02    |
| 1 | 293559768 | 293570855 | 11.087  |
| 1 | 293575975 | 293576069 | 0.094   |
| 1 | 293582037 | 293583545 | 1.508   |
| 1 | 293583960 | 293584532 | 0.572   |
| 1 | 293591285 | 293593842 | 2.557   |
| 1 | 293594876 | 293595793 | 0.917   |
| 1 | 293619341 | 293620675 | 1.334   |
| 1 | 293632947 | 293632974 | 0.027   |
| 1 | 293651473 | 293651572 | 0.099   |
| 1 | 293651646 | 293660991 | 9.345   |
| 1 | 293662991 | 293663021 | 0.03    |
| 1 | 293814840 | 293814979 | 0.139   |
| 1 | 293814996 | 294036324 | 221.328 |
| 1 | 294057008 | 294147092 | 90.084  |
| 1 | 294193960 | 294195450 | 1.49    |
| 1 | 294201979 | 294204792 | 2.813   |
| 1 | 294212276 | 294321104 | 108.828 |
| 1 | 294381416 | 294385202 | 3.786   |
| 1 | 294403516 | 294411171 | 7.655   |
| 1 | 294424453 | 294440927 | 16.474  |
| 1 | 294457239 | 294457243 | 0.004   |
| 1 | 294457277 | 294457296 | 0.019   |
| 1 | 294457360 | 294457371 | 0.011   |
| 1 | 294457420 | 294457427 | 0.007   |
| 1 | 294457549 | 294457557 | 0.008   |
| 1 | 294457558 | 294457590 | 0.032   |
| 1 | 294457628 | 294457684 | 0.056   |
| 1 | 294457753 | 294457824 | 0.071   |
| 1 | 294457846 | 294457873 | 0.027   |
| 1 | 294457953 | 294457963 | 0.01    |
| 1 | 294458008 | 294458051 | 0.043   |
| 1 | 294458053 | 294458076 | 0.023   |
| 1 | 294458090 | 294458136 | 0.046   |
| 1 | 294458147 | 294458245 | 0.098   |
| 1 | 294458324 | 294458341 | 0.017   |
| 1 | 294458384 | 294458391 | 0.007   |
| 1 | 294458469 | 294458513 | 0.044   |
| 1 | 294458532 | 294458558 | 0.026   |
| 1 | 294458703 | 294458713 | 0.01    |
| 1 | 294458791 | 294458796 | 0.005   |
| 1 | 294458864 | 294458962 | 0.098   |
| 1 | 294459068 | 294459078 | 0.01    |
| 1 | 294459279 | 294459313 | 0.034   |
| 1 | 294459415 | 294459496 | 0.081   |
| 1 | 294459505 | 294459517 | 0.012   |
| 1 | 294459553 | 294459564 | 0.011   |

|   |           |           |         |
|---|-----------|-----------|---------|
| 1 | 294459649 | 294459694 | 0.045   |
| 1 | 294459727 | 294459751 | 0.024   |
| 1 | 294459826 | 294459899 | 0.073   |
| 1 | 294459970 | 294459977 | 0.007   |
| 1 | 294459996 | 294460002 | 0.006   |
| 1 | 294460076 | 294460096 | 0.02    |
| 1 | 294460109 | 294460127 | 0.018   |
| 1 | 294460135 | 294460144 | 0.009   |
| 1 | 294460248 | 294460260 | 0.012   |
| 1 | 294460351 | 294460356 | 0.005   |
| 1 | 294460403 | 294460417 | 0.014   |
| 1 | 294460532 | 294460670 | 0.138   |
| 1 | 294460799 | 294460813 | 0.014   |
| 1 | 294462794 | 295028351 | 565.557 |
| 1 | 295046727 | 295046735 | 0.008   |
| 1 | 295046817 | 295100575 | 53.758  |
| 1 | 295134643 | 295218220 | 83.577  |
| 1 | 295398838 | 295398876 | 0.038   |
| 1 | 295417315 | 295426759 | 9.444   |
| 2 | 7304      | 17498     | 10.194  |
| 2 | 19506     | 24258     | 4.752   |
| 2 | 45525     | 72116     | 26.591  |
| 2 | 72289     | 87416     | 15.127  |
| 2 | 104165    | 105312    | 1.147   |
| 2 | 128109    | 139244    | 11.135  |
| 2 | 154679    | 167488    | 12.809  |
| 2 | 176722    | 179133    | 2.411   |
| 2 | 268869    | 360534    | 91.665  |
| 2 | 367444    | 369533    | 2.089   |
| 2 | 422016    | 446965    | 24.949  |
| 2 | 457920    | 545438    | 87.518  |
| 2 | 545472    | 589791    | 44.319  |
| 2 | 590390    | 601959    | 11.569  |
| 2 | 604155    | 660311    | 56.156  |
| 2 | 666207    | 672263    | 6.056   |
| 2 | 683528    | 705743    | 22.215  |
| 2 | 728344    | 740291    | 11.947  |
| 2 | 802711    | 818493    | 15.782  |
| 2 | 828569    | 838838    | 10.269  |
| 2 | 877024    | 973313    | 96.289  |
| 2 | 990945    | 998528    | 7.583   |
| 2 | 1001201   | 1166790   | 165.589 |
| 2 | 1172314   | 1179208   | 6.894   |
| 2 | 1195786   | 1217624   | 21.838  |
| 2 | 1246720   | 1262215   | 15.495  |
| 2 | 1263440   | 1340107   | 76.667  |
| 2 | 1349188   | 1369372   | 20.184  |
| 2 | 1397502   | 1491142   | 93.64   |
| 2 | 1507853   | 1518701   | 10.848  |
| 2 | 1533561   | 1534446   | 0.885   |
| 2 | 1540635   | 1544639   | 4.004   |
| 2 | 1547436   | 1576220   | 28.784  |
| 2 | 1581559   | 1596628   | 15.069  |
| 2 | 1658137   | 1666224   | 8.087   |
| 2 | 1675250   | 1731285   | 56.035  |
| 2 | 1742943   | 1763430   | 20.487  |
| 2 | 1764993   | 1958470   | 193.477 |
| 2 | 1961258   | 1998856   | 37.598  |
| 2 | 2007109   | 2090483   | 83.374  |
| 2 | 2107843   | 2142248   | 34.405  |
| 2 | 2159808   | 2314842   | 155.034 |

|   |         |         |         |
|---|---------|---------|---------|
| 2 | 2317904 | 2356404 | 38.5    |
| 2 | 2365803 | 2379316 | 13.513  |
| 2 | 2413998 | 2415230 | 1.232   |
| 2 | 2433407 | 2459510 | 26.103  |
| 2 | 2459528 | 2471283 | 11.755  |
| 2 | 2500292 | 2537780 | 37.488  |
| 2 | 2560799 | 2603311 | 42.512  |
| 2 | 2682080 | 2902586 | 220.506 |
| 2 | 2902683 | 3028653 | 125.97  |
| 2 | 3029077 | 3103247 | 74.17   |
| 2 | 3103250 | 3109450 | 6.2     |
| 2 | 3109451 | 3164888 | 55.437  |
| 2 | 3184826 | 3198703 | 13.877  |
| 2 | 3265485 | 3276060 | 10.575  |
| 2 | 3276065 | 3371628 | 95.563  |
| 2 | 3374344 | 3375661 | 1.317   |
| 2 | 3380424 | 3424867 | 44.443  |
| 2 | 3434036 | 3882894 | 448.858 |
| 2 | 3882897 | 3923104 | 40.207  |
| 2 | 3928954 | 4126740 | 197.786 |
| 2 | 4156748 | 4242015 | 85.267  |
| 2 | 4326896 | 4349920 | 23.024  |
| 2 | 4378525 | 4485881 | 107.356 |
| 2 | 4485904 | 4550846 | 64.942  |
| 2 | 4661718 | 4661904 | 0.186   |
| 2 | 4704287 | 4765400 | 61.113  |
| 2 | 4813018 | 4822732 | 9.714   |
| 2 | 4828039 | 4865036 | 36.997  |
| 2 | 4865077 | 4962686 | 97.609  |
| 2 | 4962730 | 4966465 | 3.735   |
| 2 | 4992500 | 5010011 | 17.511  |
| 2 | 5016531 | 5021862 | 5.331   |
| 2 | 5026504 | 5033769 | 7.265   |
| 2 | 5128741 | 5140947 | 12.206  |
| 2 | 5140970 | 5141145 | 0.175   |
| 2 | 5147292 | 5184746 | 37.454  |
| 2 | 5259364 | 5259388 | 0.024   |
| 2 | 5269487 | 5309557 | 40.07   |
| 2 | 5320872 | 5334292 | 13.42   |
| 2 | 5371597 | 5397754 | 26.157  |
| 2 | 5418518 | 5418538 | 0.02    |
| 2 | 5420465 | 5473429 | 52.964  |
| 2 | 5501701 | 5507154 | 5.453   |
| 2 | 5528524 | 5602956 | 74.432  |
| 2 | 5603265 | 5651447 | 48.182  |
| 2 | 5676452 | 5676467 | 0.015   |
| 2 | 5716722 | 5730597 | 13.875  |
| 2 | 5739305 | 5754675 | 15.37   |
| 2 | 5772304 | 5941069 | 168.765 |
| 2 | 5956421 | 5956437 | 0.016   |
| 2 | 5972270 | 6123092 | 150.822 |
| 2 | 6125526 | 6171459 | 45.933  |
| 2 | 6180468 | 6192110 | 11.642  |
| 2 | 6227731 | 6239068 | 11.337  |
| 2 | 6261665 | 6331757 | 70.092  |
| 2 | 6331760 | 6384433 | 52.673  |
| 2 | 6432551 | 6474284 | 41.733  |
| 2 | 6481137 | 6535762 | 54.625  |
| 2 | 6607678 | 6973430 | 365.752 |
| 2 | 7095234 | 7421198 | 325.964 |
| 2 | 7425271 | 7432197 | 6.926   |



|   |          |          |         |
|---|----------|----------|---------|
| 2 | 7446328  | 7454770  | 8.442   |
| 2 | 7499427  | 7511727  | 12.3    |
| 2 | 7520000  | 7541452  | 21.452  |
| 2 | 7566576  | 7567050  | 0.474   |
| 2 | 7571293  | 7620838  | 49.545  |
| 2 | 7715890  | 7724246  | 8.356   |
| 2 | 7746852  | 7746862  | 0.01    |
| 2 | 7859648  | 8025287  | 165.639 |
| 2 | 8026899  | 8053627  | 26.728  |
| 2 | 8053636  | 8068843  | 15.207  |
| 2 | 8300125  | 8346270  | 46.145  |
| 2 | 8346582  | 8346587  | 0.005   |
| 2 | 8351123  | 8351836  | 0.713   |
| 2 | 8356935  | 8378549  | 21.614  |
| 2 | 8512624  | 8515838  | 3.214   |
| 2 | 8523531  | 8524523  | 0.992   |
| 2 | 8526925  | 8530501  | 3.576   |
| 2 | 8560334  | 8561640  | 1.306   |
| 2 | 8576026  | 8583262  | 7.236   |
| 2 | 8591852  | 8705020  | 113.168 |
| 2 | 8742491  | 8748608  | 6.117   |
| 2 | 8757505  | 8759098  | 1.593   |
| 2 | 8783230  | 8802916  | 19.686  |
| 2 | 8804348  | 8804367  | 0.019   |
| 2 | 8824137  | 8824151  | 0.014   |
| 2 | 8840502  | 8840696  | 0.194   |
| 2 | 8843638  | 8843663  | 0.025   |
| 2 | 8843666  | 9100818  | 257.152 |
| 2 | 9241487  | 9243328  | 1.841   |
| 2 | 9324790  | 9357316  | 32.526  |
| 2 | 9384164  | 9450719  | 66.555  |
| 2 | 9452303  | 9453652  | 1.349   |
| 2 | 9470156  | 9471122  | 0.966   |
| 2 | 9474831  | 9664469  | 189.638 |
| 2 | 9664482  | 9672863  | 8.381   |
| 2 | 9682795  | 9688876  | 6.081   |
| 2 | 9777542  | 9916205  | 138.663 |
| 2 | 9970358  | 9972369  | 2.011   |
| 2 | 9972410  | 9972415  | 0.005   |
| 2 | 9997944  | 9997992  | 0.048   |
| 2 | 10006409 | 10007554 | 1.145   |
| 2 | 10135687 | 10178807 | 43.12   |
| 2 | 10349132 | 10453696 | 104.564 |
| 2 | 10493030 | 10510740 | 17.71   |
| 2 | 10558726 | 10623473 | 64.747  |
| 2 | 10647659 | 10757109 | 109.45  |
| 2 | 10962237 | 11087034 | 124.797 |
| 2 | 11098721 | 11112822 | 14.101  |
| 2 | 11122590 | 11305619 | 183.029 |
| 2 | 11345961 | 11643059 | 297.098 |
| 2 | 11643115 | 11649763 | 6.648   |
| 2 | 11754586 | 11754609 | 0.023   |
| 2 | 11845028 | 11845050 | 0.022   |
| 2 | 11845202 | 11848898 | 3.696   |
| 2 | 11871393 | 11873111 | 1.718   |
| 2 | 11876590 | 11876718 | 0.128   |
| 2 | 11893066 | 11893107 | 0.041   |
| 2 | 11901065 | 11901177 | 0.112   |
| 2 | 11909052 | 11945090 | 36.038  |
| 2 | 11962789 | 11977751 | 14.962  |
| 2 | 12080271 | 12082661 | 2.39    |

|   |          |          |          |
|---|----------|----------|----------|
| 2 | 12085761 | 12089213 | 3.452    |
| 2 | 12095950 | 12096239 | 0.289    |
| 2 | 12186725 | 12187153 | 0.428    |
| 2 | 12203220 | 12259252 | 56.032   |
| 2 | 12259282 | 12259287 | 0.005    |
| 2 | 12275827 | 12275841 | 0.014    |
| 2 | 12310860 | 12310912 | 0.052    |
| 2 | 12333130 | 12333149 | 0.019    |
| 2 | 12333346 | 12333355 | 0.009    |
| 2 | 12333402 | 12337005 | 3.603    |
| 2 | 12337984 | 12340260 | 2.276    |
| 2 | 12409551 | 12501491 | 91.94    |
| 2 | 12578566 | 12578627 | 0.061    |
| 2 | 12578688 | 12578709 | 0.021    |
| 2 | 12586964 | 13207792 | 620.828  |
| 2 | 13207800 | 13242163 | 34.363   |
| 2 | 13251947 | 13284598 | 32.651   |
| 2 | 13312638 | 13426368 | 113.73   |
| 2 | 13426387 | 14397515 | 971.128  |
| 2 | 14398833 | 14416605 | 17.772   |
| 2 | 14453729 | 14526801 | 73.072   |
| 2 | 14850339 | 14881146 | 30.807   |
| 2 | 14944366 | 14960935 | 16.569   |
| 2 | 15273472 | 15298757 | 25.285   |
| 2 | 15368147 | 15444104 | 75.957   |
| 2 | 15449336 | 15474610 | 25.274   |
| 2 | 15486428 | 15501560 | 15.132   |
| 2 | 15569156 | 15593980 | 24.824   |
| 2 | 15618200 | 15659622 | 41.422   |
| 2 | 15662753 | 15667847 | 5.094    |
| 2 | 15668048 | 15668259 | 0.211    |
| 2 | 15668268 | 15668838 | 0.57     |
| 2 | 15669849 | 15673267 | 3.418    |
| 2 | 15681344 | 15681431 | 0.087    |
| 2 | 15691008 | 15727407 | 36.399   |
| 2 | 15759211 | 15793835 | 34.624   |
| 2 | 15805761 | 15835140 | 29.379   |
| 2 | 15835176 | 15921169 | 85.993   |
| 2 | 15969926 | 16069963 | 100.037  |
| 2 | 16071675 | 16099391 | 27.716   |
| 2 | 16099878 | 16099883 | 0.005    |
| 2 | 16111708 | 16299440 | 187.732  |
| 2 | 16309299 | 16330675 | 21.376   |
| 2 | 16363370 | 16375788 | 12.418   |
| 2 | 16682604 | 16829789 | 147.185  |
| 2 | 16841950 | 16842097 | 0.147    |
| 2 | 16847372 | 17918953 | 1071.581 |
| 2 | 22548139 | 22871011 | 322.872  |
| 2 | 23017240 | 23022196 | 4.956    |
| 2 | 23045801 | 23249690 | 203.889  |
| 2 | 23471149 | 23484473 | 13.324   |
| 2 | 23529785 | 23532192 | 2.407    |
| 2 | 23547987 | 23623335 | 75.348   |
| 2 | 23629366 | 23763774 | 134.408  |
| 2 | 23763780 | 23772572 | 8.792    |
| 2 | 23878907 | 23990129 | 111.222  |
| 2 | 24125686 | 24175915 | 50.229   |
| 2 | 24199168 | 24207530 | 8.362    |
| 2 | 24208681 | 24222401 | 13.72    |
| 2 | 24241398 | 24657066 | 415.668  |
| 2 | 24657081 | 24733574 | 76.493   |

|   |          |          |         |
|---|----------|----------|---------|
| 2 | 24744860 | 24754687 | 9.827   |
| 2 | 24814071 | 24821128 | 7.057   |
| 2 | 24895834 | 24948017 | 52.183  |
| 2 | 24948137 | 25038511 | 90.374  |
| 2 | 25044285 | 25044301 | 0.016   |
| 2 | 25087845 | 25091729 | 3.884   |
| 2 | 25119684 | 25128124 | 8.44    |
| 2 | 25144320 | 25144444 | 0.124   |
| 2 | 25147497 | 25179446 | 31.949  |
| 2 | 25265341 | 25384087 | 118.746 |
| 2 | 25422740 | 25466843 | 44.103  |
| 2 | 25515288 | 25525447 | 10.159  |
| 2 | 25667494 | 26574019 | 906.525 |
| 2 | 26988504 | 27185232 | 196.728 |
| 2 | 27640844 | 27903719 | 262.875 |
| 2 | 27903732 | 28128002 | 224.27  |
| 2 | 28188041 | 29172524 | 984.483 |
| 2 | 32908073 | 33002685 | 94.612  |
| 2 | 33889666 | 33889685 | 0.019   |
| 2 | 33889806 | 34741833 | 852.027 |
| 2 | 35291632 | 35677307 | 385.675 |
| 2 | 35706672 | 35741525 | 34.853  |
| 2 | 35832812 | 36161015 | 328.203 |
| 2 | 36183482 | 36189845 | 6.363   |
| 2 | 36191219 | 36195476 | 4.257   |
| 2 | 36199299 | 36520620 | 321.321 |
| 2 | 36548892 | 36620941 | 72.049  |
| 2 | 36630446 | 36824867 | 194.421 |
| 2 | 36828612 | 37069785 | 241.173 |
| 2 | 37069918 | 37081199 | 11.281  |
| 2 | 37117584 | 37144186 | 26.602  |
| 2 | 37144531 | 37230348 | 85.817  |
| 2 | 37298381 | 37313177 | 14.796  |
| 2 | 37352930 | 37692022 | 339.092 |
| 2 | 38032808 | 38032846 | 0.038   |
| 2 | 38217246 | 38363413 | 146.167 |
| 2 | 38417743 | 38442070 | 24.327  |
| 2 | 38510663 | 38562861 | 52.198  |
| 2 | 38587001 | 38588211 | 1.21    |
| 2 | 38650182 | 38662045 | 11.863  |
| 2 | 38662046 | 38675305 | 13.259  |
| 2 | 38682375 | 38778253 | 95.878  |
| 2 | 38795491 | 39028489 | 232.998 |
| 2 | 39066873 | 39074917 | 8.044   |
| 2 | 39084135 | 39454174 | 370.039 |
| 2 | 39454187 | 39583807 | 129.62  |
| 2 | 39643351 | 39658210 | 14.859  |
| 2 | 39673751 | 40266650 | 592.899 |
| 2 | 40287987 | 40352865 | 64.878  |
| 2 | 40459375 | 40637441 | 178.066 |
| 2 | 40650827 | 40661295 | 10.468  |
| 2 | 40754224 | 40764441 | 10.217  |
| 2 | 40827188 | 40828476 | 1.288   |
| 2 | 40981216 | 41032879 | 51.663  |
| 2 | 41041858 | 41041918 | 0.06    |
| 2 | 41238209 | 41340064 | 101.855 |
| 2 | 41908377 | 42342266 | 433.889 |
| 2 | 42390791 | 42424349 | 33.558  |
| 2 | 42424488 | 42787866 | 363.378 |
| 2 | 42971550 | 42971576 | 0.026   |
| 2 | 42987480 | 43028422 | 40.942  |

|   |          |          |         |
|---|----------|----------|---------|
| 2 | 43151891 | 43265691 | 113.8   |
| 2 | 43413775 | 43431319 | 17.544  |
| 2 | 43489273 | 43510828 | 21.555  |
| 2 | 43628929 | 43868630 | 239.701 |
| 2 | 43917039 | 43933470 | 16.431  |
| 2 | 43947949 | 44044161 | 96.212  |
| 2 | 44253226 | 44276611 | 23.385  |
| 2 | 44321995 | 44363897 | 41.902  |
| 2 | 44454654 | 44472263 | 17.609  |
| 2 | 44486652 | 44891162 | 404.51  |
| 2 | 44891321 | 45031007 | 139.686 |
| 2 | 45182040 | 45878591 | 696.551 |
| 2 | 45878608 | 45996717 | 118.109 |
| 2 | 46031204 | 46031250 | 0.046   |
| 2 | 46031716 | 46031719 | 0.003   |
| 2 | 46031736 | 46032057 | 0.321   |
| 2 | 46032180 | 46034092 | 1.912   |
| 2 | 46034183 | 46035626 | 1.443   |
| 2 | 46035841 | 46035909 | 0.068   |
| 2 | 46039185 | 46039996 | 0.811   |
| 2 | 46041026 | 46041044 | 0.018   |
| 2 | 46045627 | 46046388 | 0.761   |
| 2 | 46046414 | 46046435 | 0.021   |
| 2 | 46048050 | 46049606 | 1.556   |
| 2 | 46050787 | 46050834 | 0.047   |
| 2 | 46052052 | 46052067 | 0.015   |
| 2 | 46057201 | 46113426 | 56.225  |
| 2 | 46131494 | 46162706 | 31.212  |
| 2 | 46162739 | 46162762 | 0.023   |
| 2 | 46185141 | 46194560 | 9.419   |
| 2 | 46223544 | 46223567 | 0.023   |
| 2 | 46228250 | 46231827 | 3.577   |
| 2 | 46231836 | 46243539 | 11.703  |
| 2 | 46304426 | 46385014 | 80.588  |
| 2 | 46403731 | 46407243 | 3.512   |
| 2 | 46409264 | 46432432 | 23.168  |
| 2 | 46433679 | 46445218 | 11.539  |
| 2 | 46453252 | 46468866 | 15.614  |
| 2 | 46489743 | 46517367 | 27.624  |
| 2 | 46548685 | 46559490 | 10.805  |
| 2 | 46566799 | 46569439 | 2.64    |
| 2 | 46575696 | 46581686 | 5.99    |
| 2 | 46601367 | 46601384 | 0.017   |
| 2 | 46601581 | 46605961 | 4.38    |
| 2 | 46659067 | 46831145 | 172.078 |
| 2 | 46844133 | 46844154 | 0.021   |
| 2 | 46844158 | 46872795 | 28.637  |
| 2 | 46912679 | 46927354 | 14.675  |
| 2 | 46980418 | 47020840 | 40.422  |
| 2 | 47040344 | 47056531 | 16.187  |
| 2 | 47062711 | 47068290 | 5.579   |
| 2 | 47118947 | 47275456 | 156.509 |
| 2 | 47291857 | 47373212 | 81.355  |
| 2 | 47396284 | 47402082 | 5.798   |
| 2 | 47425140 | 47514447 | 89.307  |
| 2 | 47521575 | 47652920 | 131.345 |
| 2 | 47724070 | 47731580 | 7.51    |
| 2 | 47748408 | 47767288 | 18.88   |
| 2 | 47772454 | 48035083 | 262.629 |
| 2 | 48131547 | 48178459 | 46.912  |
| 2 | 48197969 | 48199025 | 1.056   |

|   |          |          |         |
|---|----------|----------|---------|
| 2 | 48215476 | 48242183 | 26.707  |
| 2 | 48265154 | 48317786 | 52.632  |
| 2 | 48363341 | 48387742 | 24.401  |
| 2 | 48396156 | 48591469 | 195.313 |
| 2 | 48633361 | 48644928 | 11.567  |
| 2 | 48695416 | 48712988 | 17.572  |
| 2 | 48733142 | 48837901 | 104.759 |
| 2 | 48909993 | 49097508 | 187.515 |
| 2 | 49120342 | 49147779 | 27.437  |
| 2 | 49147794 | 49153494 | 5.7     |
| 2 | 49168822 | 49221746 | 52.924  |
| 2 | 49242043 | 49398717 | 156.674 |
| 2 | 49401150 | 49502921 | 101.771 |
| 2 | 49556862 | 49593800 | 36.938  |
| 2 | 49617288 | 49642626 | 25.338  |
| 2 | 49642664 | 49655263 | 12.599  |
| 2 | 49674088 | 49835773 | 161.685 |
| 2 | 49998727 | 50133246 | 134.519 |
| 2 | 50304633 | 50402690 | 98.057  |
| 2 | 50548513 | 50548745 | 0.232   |
| 2 | 50568516 | 50568612 | 0.096   |
| 2 | 50649742 | 50731135 | 81.393  |
| 2 | 50769204 | 50854728 | 85.524  |
| 2 | 50885204 | 50919555 | 34.351  |
| 2 | 50919562 | 50923099 | 3.537   |
| 2 | 50925392 | 50944807 | 19.415  |
| 2 | 50984828 | 51050966 | 66.138  |
| 2 | 51157690 | 51213386 | 55.696  |
| 2 | 51231187 | 51237287 | 6.1     |
| 2 | 51245606 | 51283563 | 37.957  |
| 2 | 51348876 | 51578037 | 229.161 |
| 2 | 51620153 | 51926480 | 306.327 |
| 2 | 51962039 | 52219175 | 257.136 |
| 2 | 52230101 | 52275996 | 45.895  |
| 2 | 52292759 | 52301901 | 9.142   |
| 2 | 52376246 | 52409273 | 33.027  |
| 2 | 52513870 | 52514218 | 0.348   |
| 2 | 52556955 | 52563996 | 7.041   |
| 2 | 52668169 | 52677203 | 9.034   |
| 2 | 52687570 | 52722550 | 34.98   |
| 2 | 52745732 | 53181092 | 435.36  |
| 2 | 53230050 | 53473279 | 243.229 |
| 2 | 53490464 | 53519212 | 28.748  |
| 2 | 53520036 | 53521313 | 1.277   |
| 2 | 53590094 | 53652335 | 62.241  |
| 2 | 53729768 | 53850448 | 120.68  |
| 2 | 53850452 | 53995083 | 144.631 |
| 2 | 53995619 | 53995667 | 0.048   |
| 2 | 54027887 | 54028020 | 0.133   |
| 2 | 54285052 | 54324554 | 39.502  |
| 2 | 54421703 | 54482876 | 61.173  |
| 2 | 54544274 | 54596199 | 51.925  |
| 2 | 54619626 | 54619654 | 0.028   |
| 2 | 54619685 | 54619756 | 0.071   |
| 2 | 54621026 | 54621058 | 0.032   |
| 2 | 54621115 | 54621130 | 0.015   |
| 2 | 54621138 | 54621151 | 0.013   |
| 2 | 54621219 | 54621227 | 0.008   |
| 2 | 54631860 | 54643747 | 11.887  |
| 2 | 54704969 | 54704998 | 0.029   |
| 2 | 54705172 | 54705211 | 0.039   |

|   |          |          |          |
|---|----------|----------|----------|
| 2 | 54781025 | 54781137 | 0.112    |
| 2 | 54784584 | 54797133 | 12.549   |
| 2 | 54799903 | 54799918 | 0.015    |
| 2 | 54799919 | 54800009 | 0.09     |
| 2 | 55142393 | 55508361 | 365.968  |
| 2 | 55559059 | 55784303 | 225.244  |
| 2 | 55830057 | 56022214 | 192.157  |
| 2 | 56057912 | 56157080 | 99.168   |
| 2 | 56226623 | 56257188 | 30.565   |
| 2 | 56259182 | 56394691 | 135.509  |
| 2 | 56482651 | 56563765 | 81.114   |
| 2 | 56662330 | 56688928 | 26.598   |
| 2 | 56860944 | 56860961 | 0.017    |
| 2 | 56880404 | 56901860 | 21.456   |
| 2 | 56904900 | 57099711 | 194.811  |
| 2 | 57161258 | 57175138 | 13.88    |
| 2 | 57245495 | 57298247 | 52.752   |
| 2 | 57413499 | 57413548 | 0.049    |
| 2 | 58063965 | 59390626 | 1326.661 |
| 2 | 59390703 | 59477940 | 87.237   |
| 2 | 59922758 | 60263898 | 341.14   |
| 2 | 60335698 | 60352486 | 16.788   |
| 2 | 60354906 | 60404414 | 49.508   |
| 2 | 60427199 | 60434619 | 7.42     |
| 2 | 60434745 | 60718096 | 283.351  |
| 2 | 60744660 | 60829555 | 84.895   |
| 2 | 60856550 | 61407092 | 550.542  |
| 2 | 61408273 | 61419004 | 10.731   |
| 2 | 61443344 | 61514654 | 71.31    |
| 2 | 61593621 | 61690019 | 96.398   |
| 2 | 61708951 | 61760209 | 51.258   |
| 2 | 61806266 | 61814886 | 8.62     |
| 2 | 61814890 | 61984441 | 169.551  |
| 2 | 62008379 | 62008393 | 0.014    |
| 2 | 62008578 | 62032455 | 23.877   |
| 2 | 62055864 | 62306703 | 250.839  |
| 2 | 62310789 | 62321438 | 10.649   |
| 2 | 62355986 | 62756249 | 400.263  |
| 2 | 62770964 | 63703155 | 932.191  |
| 2 | 63726903 | 64311660 | 584.757  |
| 2 | 64315365 | 64396779 | 81.414   |
| 2 | 65007998 | 65008064 | 0.066    |
| 2 | 65286512 | 65383424 | 96.912   |
| 2 | 65538470 | 65569399 | 30.929   |
| 2 | 65611505 | 66100241 | 488.736  |
| 2 | 66100247 | 66100939 | 0.692    |
| 2 | 66101429 | 66102439 | 1.01     |
| 2 | 66102768 | 66225781 | 123.013  |
| 2 | 66301981 | 66534479 | 232.498  |
| 2 | 66544363 | 66781235 | 236.872  |
| 2 | 66795430 | 66979453 | 184.023  |
| 2 | 66994963 | 67129683 | 134.72   |
| 2 | 67158336 | 67162061 | 3.725    |
| 2 | 67314348 | 67518540 | 204.192  |
| 2 | 67724294 | 68025356 | 301.062  |
| 2 | 68086647 | 68147756 | 61.109   |
| 2 | 68159588 | 68582496 | 422.908  |
| 2 | 68618429 | 68847111 | 228.682  |
| 2 | 68850448 | 69024448 | 174      |
| 2 | 69025228 | 69128033 | 102.805  |
| 2 | 69150118 | 69178088 | 27.97    |

|   |          |          |          |
|---|----------|----------|----------|
| 2 | 69179229 | 69272940 | 93.711   |
| 2 | 69301318 | 69486309 | 184.991  |
| 2 | 69518503 | 69597987 | 79.484   |
| 2 | 69655031 | 69683363 | 28.332   |
| 2 | 69708744 | 69711632 | 2.888    |
| 2 | 69712427 | 69714734 | 2.307    |
| 2 | 69754513 | 70095756 | 341.243  |
| 2 | 70095763 | 70119319 | 23.556   |
| 2 | 70136083 | 70146331 | 10.248   |
| 2 | 70166215 | 70179314 | 13.099   |
| 2 | 70244847 | 70277417 | 32.57    |
| 2 | 70283380 | 70404673 | 121.293  |
| 2 | 70404709 | 70473618 | 68.909   |
| 2 | 70648974 | 70655017 | 6.043    |
| 2 | 70655021 | 70953541 | 298.52   |
| 2 | 71013636 | 71055567 | 41.931   |
| 2 | 71299071 | 71383289 | 84.218   |
| 2 | 71448243 | 71828688 | 380.445  |
| 2 | 71847302 | 71882567 | 35.265   |
| 2 | 72023142 | 72023149 | 0.007    |
| 2 | 72061289 | 72129313 | 68.024   |
| 2 | 72143419 | 72172550 | 29.131   |
| 2 | 72174597 | 72198734 | 24.137   |
| 2 | 72206871 | 72207005 | 0.134    |
| 2 | 72207020 | 72238455 | 31.435   |
| 2 | 72324478 | 72368728 | 44.25    |
| 2 | 72371157 | 72733966 | 362.809  |
| 2 | 72733989 | 72741163 | 7.174    |
| 2 | 72789202 | 72868702 | 79.5     |
| 2 | 73052994 | 73081683 | 28.689   |
| 2 | 73171352 | 73171364 | 0.012    |
| 2 | 73256751 | 73832970 | 576.219  |
| 2 | 73869485 | 73993089 | 123.604  |
| 2 | 74021867 | 74219692 | 197.825  |
| 2 | 74219704 | 74236540 | 16.836   |
| 2 | 74347782 | 74440153 | 92.371   |
| 2 | 74450334 | 74652602 | 202.268  |
| 2 | 74777728 | 74810265 | 32.537   |
| 2 | 74865103 | 74894687 | 29.584   |
| 2 | 74940316 | 75012597 | 72.281   |
| 2 | 75012826 | 75048543 | 35.717   |
| 2 | 75077974 | 75185375 | 107.401  |
| 2 | 75185656 | 75198973 | 13.317   |
| 2 | 75230501 | 75760760 | 530.259  |
| 2 | 76090610 | 76194530 | 103.92   |
| 2 | 76352632 | 76408094 | 55.462   |
| 2 | 76411739 | 76418868 | 7.129    |
| 2 | 76527565 | 76577783 | 50.218   |
| 2 | 76764340 | 76783815 | 19.475   |
| 2 | 76819181 | 77674370 | 855.189  |
| 2 | 77752533 | 78386986 | 634.453  |
| 2 | 78404867 | 78527849 | 122.982  |
| 2 | 78603523 | 79272799 | 669.276  |
| 2 | 79449523 | 80312003 | 862.48   |
| 2 | 80584063 | 81330244 | 746.181  |
| 2 | 82145903 | 83864507 | 1718.604 |
| 2 | 84177994 | 84544807 | 366.813  |
| 2 | 84706423 | 85244371 | 537.948  |
| 2 | 85467258 | 86506548 | 1039.29  |
| 2 | 86620663 | 86620766 | 0.103    |
| 2 | 86620770 | 86620780 | 0.01     |

|   |          |          |       |
|---|----------|----------|-------|
| 2 | 86620867 | 86620881 | 0.014 |
| 2 | 86620962 | 86620973 | 0.011 |
| 2 | 86620979 | 86621033 | 0.054 |
| 2 | 86621096 | 86623463 | 2.367 |
| 2 | 86623474 | 86623502 | 0.028 |
| 2 | 86625679 | 86625693 | 0.014 |
| 2 | 86628362 | 86628377 | 0.015 |
| 2 | 86628390 | 86628703 | 0.313 |
| 2 | 86628793 | 86628854 | 0.061 |
| 2 | 86628988 | 86629068 | 0.08  |
| 2 | 86629524 | 86629532 | 0.008 |
| 2 | 86631352 | 86631358 | 0.006 |
| 2 | 86631744 | 86631751 | 0.007 |
| 2 | 86633890 | 86633902 | 0.012 |
| 2 | 86633919 | 86634006 | 0.087 |
| 2 | 86634143 | 86634152 | 0.009 |
| 2 | 86634457 | 86634508 | 0.051 |
| 2 | 86635160 | 86635181 | 0.021 |
| 2 | 86635560 | 86635592 | 0.032 |
| 2 | 86635598 | 86635788 | 0.19  |
| 2 | 86635880 | 86636035 | 0.155 |
| 2 | 86636356 | 86636370 | 0.014 |
| 2 | 86636401 | 86636414 | 0.013 |
| 2 | 86636427 | 86636447 | 0.02  |
| 2 | 86636457 | 86636466 | 0.009 |
| 2 | 86636581 | 86636613 | 0.032 |
| 2 | 86636691 | 86636695 | 0.004 |
| 2 | 86636715 | 86636729 | 0.014 |
| 2 | 86636732 | 86636740 | 0.008 |
| 2 | 86636812 | 86636830 | 0.018 |
| 2 | 86636843 | 86636884 | 0.041 |
| 2 | 86636885 | 86636905 | 0.02  |
| 2 | 86636917 | 86636928 | 0.011 |
| 2 | 86636979 | 86637144 | 0.165 |
| 2 | 86637545 | 86637662 | 0.117 |
| 2 | 86637671 | 86637678 | 0.007 |
| 2 | 86637702 | 86637705 | 0.003 |
| 2 | 86637752 | 86637780 | 0.028 |
| 2 | 86637795 | 86637957 | 0.162 |
| 2 | 86637964 | 86637973 | 0.009 |
| 2 | 86637981 | 86637983 | 0.002 |
| 2 | 86638048 | 86638091 | 0.043 |
| 2 | 86638197 | 86638210 | 0.013 |
| 2 | 86638431 | 86638487 | 0.056 |
| 2 | 86638517 | 86638534 | 0.017 |
| 2 | 86638552 | 86638573 | 0.021 |
| 2 | 86638583 | 86638595 | 0.012 |
| 2 | 86638657 | 86638676 | 0.019 |
| 2 | 86638760 | 86638835 | 0.075 |
| 2 | 86638972 | 86638982 | 0.01  |
| 2 | 86639030 | 86639041 | 0.011 |
| 2 | 86639114 | 86639123 | 0.009 |
| 2 | 86639285 | 86639313 | 0.028 |
| 2 | 86639379 | 86639406 | 0.027 |
| 2 | 86639454 | 86639494 | 0.04  |
| 2 | 86639513 | 86639564 | 0.051 |
| 2 | 86639574 | 86639612 | 0.038 |
| 2 | 86639619 | 86639622 | 0.003 |
| 2 | 86639696 | 86639722 | 0.026 |
| 2 | 86639732 | 86639746 | 0.014 |
| 2 | 86639788 | 86639820 | 0.032 |



|   |          |          |       |
|---|----------|----------|-------|
| 2 | 86639854 | 86639872 | 0.018 |
| 2 | 86639876 | 86639888 | 0.012 |
| 2 | 86639931 | 86639975 | 0.044 |
| 2 | 86640058 | 86640098 | 0.04  |
| 2 | 86640107 | 86640118 | 0.011 |
| 2 | 86640120 | 86640150 | 0.03  |
| 2 | 86640255 | 86640274 | 0.019 |
| 2 | 86640278 | 86640327 | 0.049 |
| 2 | 86640365 | 86640379 | 0.014 |
| 2 | 86640387 | 86640439 | 0.052 |
| 2 | 86640453 | 86640466 | 0.013 |
| 2 | 86640471 | 86640494 | 0.023 |
| 2 | 86640498 | 86640507 | 0.009 |
| 2 | 86640508 | 86640522 | 0.014 |
| 2 | 86640523 | 86640530 | 0.007 |
| 2 | 86640617 | 86640637 | 0.02  |
| 2 | 86640666 | 86640702 | 0.036 |
| 2 | 86640740 | 86640752 | 0.012 |
| 2 | 86640804 | 86640817 | 0.013 |
| 2 | 86640879 | 86640910 | 0.031 |
| 2 | 86640923 | 86640994 | 0.071 |
| 2 | 86641072 | 86641097 | 0.025 |
| 2 | 86641209 | 86641218 | 0.009 |
| 2 | 86641286 | 86641298 | 0.012 |
| 2 | 86641378 | 86641398 | 0.02  |
| 2 | 86641401 | 86641454 | 0.053 |
| 2 | 86641548 | 86641573 | 0.025 |
| 2 | 86641657 | 86641667 | 0.01  |
| 2 | 86641684 | 86641701 | 0.017 |
| 2 | 86641710 | 86641947 | 0.237 |
| 2 | 86641979 | 86641991 | 0.012 |
| 2 | 86642062 | 86642067 | 0.005 |
| 2 | 86642077 | 86642188 | 0.111 |
| 2 | 86642540 | 86642549 | 0.009 |
| 2 | 86642579 | 86642588 | 0.009 |
| 2 | 86642664 | 86642669 | 0.005 |
| 2 | 86642715 | 86642882 | 0.167 |
| 2 | 86643081 | 86643095 | 0.014 |
| 2 | 86643194 | 86643222 | 0.028 |
| 2 | 86643359 | 86643365 | 0.006 |
| 2 | 86643402 | 86643408 | 0.006 |
| 2 | 86643450 | 86643495 | 0.045 |
| 2 | 86643498 | 86643505 | 0.007 |
| 2 | 86643537 | 86643551 | 0.014 |
| 2 | 86643556 | 86643572 | 0.016 |
| 2 | 86643669 | 86643677 | 0.008 |
| 2 | 86643698 | 86643745 | 0.047 |
| 2 | 86643758 | 86643777 | 0.019 |
| 2 | 86643781 | 86643824 | 0.043 |
| 2 | 86643838 | 86643915 | 0.077 |
| 2 | 86643971 | 86643977 | 0.006 |
| 2 | 86644053 | 86644078 | 0.025 |
| 2 | 86644230 | 86644273 | 0.043 |
| 2 | 86644360 | 86644410 | 0.05  |
| 2 | 86644476 | 86644510 | 0.034 |
| 2 | 86644626 | 86644681 | 0.055 |
| 2 | 86644726 | 86644745 | 0.019 |
| 2 | 86644748 | 86644820 | 0.072 |
| 2 | 86644876 | 86644894 | 0.018 |
| 2 | 86644984 | 86645001 | 0.017 |
| 2 | 86645039 | 86645048 | 0.009 |

|   |          |          |       |
|---|----------|----------|-------|
| 2 | 86645082 | 86645094 | 0.012 |
| 2 | 86645101 | 86645170 | 0.069 |
| 2 | 86645171 | 86645177 | 0.006 |
| 2 | 86645221 | 86645233 | 0.012 |
| 2 | 86645261 | 86645301 | 0.04  |
| 2 | 86645437 | 86645460 | 0.023 |
| 2 | 86645553 | 86645642 | 0.089 |
| 2 | 86645851 | 86645877 | 0.026 |
| 2 | 86647691 | 86649449 | 1.758 |
| 2 | 86650627 | 86650632 | 0.005 |
| 2 | 86657236 | 86657260 | 0.024 |
| 2 | 86657275 | 86658459 | 1.184 |
| 2 | 86659593 | 86662257 | 2.664 |
| 2 | 86662313 | 86665224 | 2.911 |
| 2 | 86665322 | 86665465 | 0.143 |
| 2 | 86665676 | 86665689 | 0.013 |
| 2 | 86665770 | 86665776 | 0.006 |
| 2 | 86665831 | 86665840 | 0.009 |
| 2 | 86665878 | 86665961 | 0.083 |
| 2 | 86666038 | 86666066 | 0.028 |
| 2 | 86666203 | 86666223 | 0.02  |
| 2 | 86666229 | 86666315 | 0.086 |
| 2 | 86666391 | 86666487 | 0.096 |
| 2 | 86666494 | 86666497 | 0.003 |
| 2 | 86666498 | 86666505 | 0.007 |
| 2 | 86666791 | 86666821 | 0.03  |
| 2 | 86666871 | 86666931 | 0.06  |
| 2 | 86666999 | 86667054 | 0.055 |
| 2 | 86667107 | 86667137 | 0.03  |
| 2 | 86667153 | 86667163 | 0.01  |
| 2 | 86667215 | 86667223 | 0.008 |
| 2 | 86667295 | 86667307 | 0.012 |
| 2 | 86667375 | 86667384 | 0.009 |
| 2 | 86667417 | 86667431 | 0.014 |
| 2 | 86667450 | 86667487 | 0.037 |
| 2 | 86667498 | 86667512 | 0.014 |
| 2 | 86667601 | 86667645 | 0.044 |
| 2 | 86667685 | 86667738 | 0.053 |
| 2 | 86667744 | 86667748 | 0.004 |
| 2 | 86667764 | 86667766 | 0.002 |
| 2 | 86667854 | 86667884 | 0.03  |
| 2 | 86667968 | 86667985 | 0.017 |
| 2 | 86668316 | 86668326 | 0.01  |
| 2 | 86668391 | 86668419 | 0.028 |
| 2 | 86668554 | 86668568 | 0.014 |
| 2 | 86668613 | 86668665 | 0.052 |
| 2 | 86668673 | 86668687 | 0.014 |
| 2 | 86668709 | 86668742 | 0.033 |
| 2 | 86668747 | 86668756 | 0.009 |
| 2 | 86668801 | 86668806 | 0.005 |
| 2 | 86668904 | 86668916 | 0.012 |
| 2 | 86668918 | 86668939 | 0.021 |
| 2 | 86669099 | 86669103 | 0.004 |
| 2 | 86669290 | 86669294 | 0.004 |
| 2 | 86669301 | 86669320 | 0.019 |
| 2 | 86669321 | 86669346 | 0.025 |
| 2 | 86669381 | 86669405 | 0.024 |
| 2 | 86669468 | 86669476 | 0.008 |
| 2 | 86669612 | 86669638 | 0.026 |
| 2 | 86669689 | 86669705 | 0.016 |
| 2 | 86669975 | 86669978 | 0.003 |

|   |           |           |          |
|---|-----------|-----------|----------|
| 2 | 86670070  | 86670085  | 0.015    |
| 2 | 86670274  | 86670315  | 0.041    |
| 2 | 86670447  | 86670470  | 0.023    |
| 2 | 86670580  | 86670591  | 0.011    |
| 2 | 86670607  | 86670619  | 0.012    |
| 2 | 86670661  | 86670677  | 0.016    |
| 2 | 86670684  | 86670729  | 0.045    |
| 2 | 86670818  | 86670829  | 0.011    |
| 2 | 86670886  | 86671500  | 0.614    |
| 2 | 86671710  | 86671726  | 0.016    |
| 2 | 86671778  | 86671911  | 0.133    |
| 2 | 86671917  | 86671923  | 0.006    |
| 2 | 86672468  | 86672524  | 0.056    |
| 2 | 86672878  | 86672898  | 0.02     |
| 2 | 86673506  | 86673595  | 0.089    |
| 2 | 86673745  | 86673777  | 0.032    |
| 2 | 86673785  | 86673921  | 0.136    |
| 2 | 86674366  | 86674431  | 0.065    |
| 2 | 86675456  | 86675467  | 0.011    |
| 2 | 86675565  | 86676152  | 0.587    |
| 2 | 86676164  | 86676228  | 0.064    |
| 2 | 86676248  | 86676489  | 0.241    |
| 2 | 86676806  | 86676937  | 0.131    |
| 2 | 86677189  | 86677255  | 0.066    |
| 2 | 86677385  | 86678218  | 0.833    |
| 2 | 86679485  | 86679782  | 0.297    |
| 2 | 86680510  | 86681607  | 1.097    |
| 2 | 86681887  | 86682045  | 0.158    |
| 2 | 86682227  | 86682252  | 0.025    |
| 2 | 86682386  | 86682390  | 0.004    |
| 2 | 86682402  | 86682425  | 0.023    |
| 2 | 86682434  | 86683075  | 0.641    |
| 2 | 86683437  | 86683572  | 0.135    |
| 2 | 86683871  | 86683879  | 0.008    |
| 2 | 86686224  | 86686675  | 0.451    |
| 2 | 86689154  | 86689180  | 0.026    |
| 2 | 86689207  | 86690070  | 0.863    |
| 2 | 86690074  | 86690327  | 0.253    |
| 2 | 86690727  | 86690740  | 0.013    |
| 2 | 86691902  | 87391377  | 699.475  |
| 2 | 89446880  | 90625719  | 1178.839 |
| 2 | 91213668  | 91820915  | 607.247  |
| 2 | 93926488  | 95969497  | 2043.009 |
| 2 | 97635148  | 99246799  | 1611.651 |
| 2 | 99464222  | 101167654 | 1703.432 |
| 2 | 101443328 | 102431543 | 988.215  |
| 2 | 102721649 | 102908755 | 187.106  |
| 2 | 102908758 | 103465524 | 556.766  |
| 2 | 103647497 | 103910384 | 262.887  |
| 2 | 104627891 | 105130209 | 502.318  |
| 2 | 105531561 | 105557418 | 25.857   |
| 2 | 105703364 | 105744434 | 41.07    |
| 2 | 105885314 | 105911709 | 26.395   |
| 2 | 106012715 | 106165029 | 152.314  |
| 2 | 106288904 | 106434899 | 145.995  |
| 2 | 106694972 | 107119635 | 424.663  |
| 2 | 107321207 | 107602956 | 281.749  |
| 2 | 107705963 | 107773794 | 67.831   |
| 2 | 107811525 | 108074094 | 262.569  |
| 2 | 108074110 | 108142425 | 68.315   |
| 2 | 108248514 | 108363325 | 114.811  |

|   |           |           |         |
|---|-----------|-----------|---------|
| 2 | 108363468 | 108463220 | 99.752  |
| 2 | 108517022 | 108553244 | 36.222  |
| 2 | 108899754 | 108952819 | 53.065  |
| 2 | 109128472 | 109216480 | 88.008  |
| 2 | 109223958 | 109232522 | 8.564   |
| 2 | 109232630 | 109327655 | 95.025  |
| 2 | 109471254 | 109644604 | 173.35  |
| 2 | 109702441 | 110678017 | 975.576 |
| 2 | 110684248 | 110926620 | 242.372 |
| 2 | 111010970 | 111057943 | 46.973  |
| 2 | 111542222 | 111727405 | 185.183 |
| 2 | 111847130 | 111934057 | 86.927  |
| 2 | 111954587 | 112039035 | 84.448  |
| 2 | 112057902 | 112626961 | 569.059 |
| 2 | 112659463 | 112901746 | 242.283 |
| 2 | 112908792 | 113093519 | 184.727 |
| 2 | 113252478 | 113687901 | 435.423 |
| 2 | 113970522 | 114184117 | 213.595 |
| 2 | 114251612 | 114252448 | 0.836   |
| 2 | 114360258 | 114410431 | 50.173  |
| 2 | 114551821 | 114579395 | 27.574  |
| 2 | 114661956 | 114722101 | 60.145  |
| 2 | 114820037 | 114967486 | 147.449 |
| 2 | 115211941 | 115239600 | 27.659  |
| 2 | 115250153 | 115632365 | 382.212 |
| 2 | 115636163 | 115637519 | 1.356   |
| 2 | 115659604 | 115686851 | 27.247  |
| 2 | 115686859 | 115687050 | 0.191   |
| 2 | 115694526 | 115780684 | 86.158  |
| 2 | 115875048 | 115901912 | 26.864  |
| 2 | 115995154 | 116180262 | 185.108 |
| 2 | 116205941 | 116639533 | 433.592 |
| 2 | 116799414 | 117454053 | 654.639 |
| 2 | 117458215 | 117609190 | 150.975 |
| 2 | 117628144 | 117635040 | 6.896   |
| 2 | 117661962 | 118001961 | 339.999 |
| 2 | 118045029 | 118146833 | 101.804 |
| 2 | 118225874 | 118745256 | 519.382 |
| 2 | 118841800 | 119412751 | 570.951 |
| 2 | 120197485 | 120474970 | 277.485 |
| 2 | 120988389 | 121548870 | 560.481 |
| 2 | 121652804 | 121664777 | 11.973  |
| 2 | 122203851 | 122240243 | 36.392  |
| 2 | 122249914 | 122257366 | 7.452   |
| 2 | 122335020 | 122378859 | 43.839  |
| 2 | 122452107 | 122536335 | 84.228  |
| 2 | 122559414 | 122575334 | 15.92   |
| 2 | 122883917 | 122895183 | 11.266  |
| 2 | 122947108 | 122999151 | 52.043  |
| 2 | 123010446 | 123015735 | 5.289   |
| 2 | 123059403 | 123255798 | 196.395 |
| 2 | 123310394 | 123318667 | 8.273   |
| 2 | 123320072 | 123528169 | 208.097 |
| 2 | 123528346 | 123531833 | 3.487   |
| 2 | 123531854 | 123608317 | 76.463  |
| 2 | 123610668 | 123618541 | 7.873   |
| 2 | 123643151 | 123680241 | 37.09   |
| 2 | 123713520 | 123734786 | 21.266  |
| 2 | 123818029 | 123860899 | 42.87   |
| 2 | 123861600 | 123925478 | 63.878  |
| 2 | 123947716 | 123960524 | 12.808  |

|   |           |           |          |
|---|-----------|-----------|----------|
| 2 | 123971690 | 124029892 | 58.202   |
| 2 | 124029968 | 124047330 | 17.362   |
| 2 | 124127710 | 124145131 | 17.421   |
| 2 | 124149934 | 124149943 | 0.009    |
| 2 | 124157893 | 124161135 | 3.242    |
| 2 | 124163306 | 124193572 | 30.266   |
| 2 | 124235919 | 124245852 | 9.933    |
| 2 | 124246000 | 124335435 | 89.435   |
| 2 | 124429731 | 124430000 | 0.269    |
| 2 | 124498052 | 124523617 | 25.565   |
| 2 | 124530162 | 124533868 | 3.706    |
| 2 | 124565484 | 124703346 | 137.862  |
| 2 | 124747298 | 124754971 | 7.673    |
| 2 | 124755553 | 124780872 | 25.319   |
| 2 | 124795387 | 124809548 | 14.161   |
| 2 | 124819530 | 124879042 | 59.512   |
| 2 | 124881902 | 124898721 | 16.819   |
| 2 | 124919648 | 125049232 | 129.584  |
| 2 | 125066986 | 125306284 | 239.298  |
| 2 | 125320757 | 125327682 | 6.925    |
| 2 | 125373683 | 125594951 | 221.268  |
| 2 | 125645067 | 125671928 | 26.861   |
| 2 | 125708128 | 125723114 | 14.986   |
| 2 | 125723979 | 125726944 | 2.965    |
| 2 | 125727144 | 125728089 | 0.945    |
| 2 | 125728192 | 126196627 | 468.435  |
| 2 | 126196636 | 126245462 | 48.826   |
| 2 | 126245484 | 126246790 | 1.306    |
| 2 | 126246803 | 126246836 | 0.033    |
| 2 | 126266913 | 126311066 | 44.153   |
| 2 | 126323962 | 126354207 | 30.245   |
| 2 | 126354282 | 126397531 | 43.249   |
| 2 | 126465236 | 126479086 | 13.85    |
| 2 | 126488674 | 126601499 | 112.825  |
| 2 | 126643014 | 126677368 | 34.354   |
| 2 | 126736136 | 126736311 | 0.175    |
| 2 | 126759147 | 126816477 | 57.33    |
| 2 | 126921476 | 127938304 | 1016.828 |
| 2 | 127938343 | 127968636 | 30.293   |
| 2 | 128000834 | 128013267 | 12.433   |
| 2 | 128045567 | 128158078 | 112.511  |
| 2 | 128188984 | 128420433 | 231.449  |
| 2 | 128429307 | 128556323 | 127.016  |
| 2 | 128561296 | 128574381 | 13.085   |
| 2 | 128575751 | 128590979 | 15.228   |
| 2 | 128625125 | 128731962 | 106.837  |
| 2 | 128782343 | 128845601 | 63.258   |
| 2 | 128846112 | 128884426 | 38.314   |
| 2 | 128940749 | 128948877 | 8.128    |
| 2 | 129122994 | 129452006 | 329.012  |
| 2 | 129492900 | 129873043 | 380.143  |
| 2 | 129910882 | 129957967 | 47.085   |
| 2 | 130023152 | 130058891 | 35.739   |
| 2 | 130074109 | 130088000 | 13.891   |
| 2 | 130091698 | 130206077 | 114.379  |
| 2 | 130224300 | 130231178 | 6.878    |
| 2 | 130288251 | 130288918 | 0.667    |
| 2 | 130390065 | 130426150 | 36.085   |
| 2 | 130477799 | 130502464 | 24.665   |
| 2 | 130552587 | 130575616 | 23.029   |
| 2 | 130580856 | 130647217 | 66.361   |

|   |           |           |         |
|---|-----------|-----------|---------|
| 2 | 130662370 | 130797389 | 135.019 |
| 2 | 130802447 | 130802629 | 0.182   |
| 2 | 130809737 | 130832726 | 22.989  |
| 2 | 130855618 | 130867695 | 12.077  |
| 2 | 130872663 | 130875022 | 2.359   |
| 2 | 130914697 | 130927272 | 12.575  |
| 2 | 130927599 | 130931046 | 3.447   |
| 2 | 130933323 | 130948700 | 15.377  |
| 2 | 130962393 | 130962554 | 0.161   |
| 2 | 130965508 | 130981404 | 15.896  |
| 2 | 131020621 | 131049604 | 28.983  |
| 2 | 131084698 | 131105984 | 21.286  |
| 2 | 131106346 | 131129933 | 23.587  |
| 2 | 131325857 | 131432321 | 106.464 |
| 2 | 131432323 | 131432362 | 0.039   |
| 2 | 131433811 | 131477650 | 43.839  |
| 2 | 131487453 | 131570892 | 83.439  |
| 2 | 131573249 | 131645590 | 72.341  |
| 2 | 131665494 | 131721152 | 55.658  |
| 2 | 131721153 | 131827893 | 106.74  |
| 2 | 131827929 | 132122039 | 294.11  |
| 2 | 132340708 | 132376525 | 35.817  |
| 2 | 132481159 | 132547737 | 66.578  |
| 2 | 132547883 | 132607913 | 60.03   |
| 2 | 132915077 | 133004502 | 89.425  |
| 2 | 133382432 | 133398671 | 16.239  |
| 2 | 133497305 | 133581486 | 84.181  |
| 2 | 133733771 | 133818071 | 84.3    |
| 2 | 133886801 | 133920700 | 33.899  |
| 2 | 133979364 | 134086467 | 107.103 |
| 2 | 134150281 | 134208281 | 58      |
| 2 | 134270351 | 134356672 | 86.321  |
| 2 | 134408173 | 134521219 | 113.046 |
| 2 | 134526853 | 134527024 | 0.171   |
| 2 | 134593253 | 134894487 | 301.234 |
| 2 | 135067493 | 135067687 | 0.194   |
| 2 | 135192655 | 135235679 | 43.024  |
| 2 | 135275231 | 135275334 | 0.103   |
| 2 | 135288846 | 135323368 | 34.522  |
| 2 | 135324083 | 135673515 | 349.432 |
| 2 | 135740363 | 135740614 | 0.251   |
| 2 | 135758072 | 135804833 | 46.761  |
| 2 | 135804846 | 135861955 | 57.109  |
| 2 | 135862077 | 135863065 | 0.988   |
| 2 | 135902965 | 135911446 | 8.481   |
| 2 | 135941836 | 135941877 | 0.041   |
| 2 | 135942602 | 135977733 | 35.131  |
| 2 | 135990027 | 135990046 | 0.019   |
| 2 | 135997754 | 136000317 | 2.563   |
| 2 | 136029142 | 136169810 | 140.668 |
| 2 | 136184751 | 136184793 | 0.042   |
| 2 | 136207375 | 136229001 | 21.626  |
| 2 | 136288874 | 136301579 | 12.705  |
| 2 | 136327501 | 136368783 | 41.282  |
| 2 | 136382409 | 136394398 | 11.989  |
| 2 | 136399404 | 136413501 | 14.097  |
| 2 | 136445885 | 136465378 | 19.493  |
| 2 | 136485328 | 136500065 | 14.737  |
| 2 | 136507759 | 136507868 | 0.109   |
| 2 | 136607524 | 136646172 | 38.648  |
| 2 | 136658569 | 136661620 | 3.051   |

|   |           |           |         |
|---|-----------|-----------|---------|
| 2 | 136661710 | 136689094 | 27.384  |
| 2 | 136704511 | 136704597 | 0.086   |
| 2 | 136704749 | 136707531 | 2.782   |
| 2 | 136749149 | 136749308 | 0.159   |
| 2 | 136750254 | 136850887 | 100.633 |
| 2 | 136862782 | 136870970 | 8.188   |
| 2 | 136925402 | 136925426 | 0.024   |
| 2 | 137069592 | 137488740 | 419.148 |
| 2 | 137492688 | 137586229 | 93.541  |
| 2 | 137671529 | 137718180 | 46.651  |
| 2 | 137805767 | 137815534 | 9.767   |
| 2 | 137862641 | 137862684 | 0.043   |
| 2 | 137862690 | 137862776 | 0.086   |
| 2 | 137880984 | 137910582 | 29.598  |
| 2 | 137910707 | 137914287 | 3.58    |
| 2 | 137914299 | 137915320 | 1.021   |
| 2 | 137916215 | 137916223 | 0.008   |
| 2 | 137916258 | 137916269 | 0.011   |
| 2 | 137922642 | 137922650 | 0.008   |
| 2 | 138051226 | 138051251 | 0.025   |
| 2 | 138090083 | 138102998 | 12.915  |
| 2 | 138349699 | 138531506 | 181.807 |
| 2 | 138696923 | 138724886 | 27.963  |
| 2 | 138724983 | 138725283 | 0.3     |
| 2 | 138725649 | 138726176 | 0.527   |
| 2 | 138726311 | 138726426 | 0.115   |
| 2 | 138727401 | 138727908 | 0.507   |
| 2 | 138729926 | 138729945 | 0.019   |
| 2 | 138730649 | 138730801 | 0.152   |
| 2 | 138732076 | 138732110 | 0.034   |
| 2 | 138733274 | 138735716 | 2.442   |
| 2 | 138735918 | 138735937 | 0.019   |
| 2 | 138735957 | 138736792 | 0.835   |
| 2 | 138736819 | 138737036 | 0.217   |
| 2 | 138737537 | 138737576 | 0.039   |
| 2 | 138739096 | 138740059 | 0.963   |
| 2 | 138740338 | 138740359 | 0.021   |
| 2 | 138742473 | 138758728 | 16.255  |
| 2 | 138765469 | 138794430 | 28.961  |
| 2 | 138904205 | 138904310 | 0.105   |
| 2 | 138943933 | 138943950 | 0.017   |
| 2 | 138944095 | 138948888 | 4.793   |
| 2 | 138949001 | 138949073 | 0.072   |
| 2 | 138950257 | 138950403 | 0.146   |
| 2 | 138950423 | 138950510 | 0.087   |
| 2 | 138952053 | 138952682 | 0.629   |
| 2 | 138952771 | 138954883 | 2.112   |
| 2 | 138954925 | 138954930 | 0.005   |
| 2 | 138954992 | 138955116 | 0.124   |
| 2 | 138955118 | 138955126 | 0.008   |
| 2 | 138960344 | 138961127 | 0.783   |
| 2 | 138963055 | 138978329 | 15.274  |
| 2 | 138978748 | 138978996 | 0.248   |
| 2 | 139005143 | 139022534 | 17.391  |
| 2 | 139022578 | 139022587 | 0.009   |
| 2 | 139023005 | 139023452 | 0.447   |
| 2 | 139023797 | 139023902 | 0.105   |
| 2 | 139024677 | 139024681 | 0.004   |
| 2 | 139024708 | 139024753 | 0.045   |
| 2 | 139025730 | 139026190 | 0.46    |
| 2 | 139026216 | 139026422 | 0.206   |

|   |           |           |         |
|---|-----------|-----------|---------|
| 2 | 139026659 | 139026799 | 0.14    |
| 2 | 139026827 | 139026855 | 0.028   |
| 2 | 139028282 | 139028325 | 0.043   |
| 2 | 139028396 | 139028429 | 0.033   |
| 2 | 139028542 | 139028988 | 0.446   |
| 2 | 139029017 | 139029099 | 0.082   |
| 2 | 139029471 | 139029574 | 0.103   |
| 2 | 139029607 | 139029621 | 0.014   |
| 2 | 139029665 | 139029686 | 0.021   |
| 2 | 139030131 | 139030869 | 0.738   |
| 2 | 139031928 | 139032116 | 0.188   |
| 2 | 139032166 | 139032262 | 0.096   |
| 2 | 139033011 | 139033179 | 0.168   |
| 2 | 139033647 | 139033666 | 0.019   |
| 2 | 139034078 | 139034418 | 0.34    |
| 2 | 139034583 | 139034801 | 0.218   |
| 2 | 139035052 | 139035092 | 0.04    |
| 2 | 139035115 | 139035141 | 0.026   |
| 2 | 139035405 | 139036418 | 1.013   |
| 2 | 139037493 | 139037682 | 0.189   |
| 2 | 139037721 | 139037807 | 0.086   |
| 2 | 139038418 | 139038450 | 0.032   |
| 2 | 139038817 | 139038840 | 0.023   |
| 2 | 139039458 | 139040134 | 0.676   |
| 2 | 139044443 | 139059105 | 14.662  |
| 2 | 139059155 | 139059185 | 0.03    |
| 2 | 139061246 | 139062872 | 1.626   |
| 2 | 139064575 | 139067159 | 2.584   |
| 2 | 139067805 | 139069876 | 2.071   |
| 2 | 139070383 | 139070402 | 0.019   |
| 2 | 139070477 | 139070655 | 0.178   |
| 2 | 139072751 | 139072804 | 0.053   |
| 2 | 139074180 | 139074203 | 0.023   |
| 2 | 139078718 | 139078758 | 0.04    |
| 2 | 139083330 | 139083376 | 0.046   |
| 2 | 139148948 | 139178201 | 29.253  |
| 2 | 139178896 | 139222064 | 43.168  |
| 2 | 139352635 | 139362477 | 9.842   |
| 2 | 139362859 | 139650567 | 287.708 |
| 2 | 139718998 | 139751302 | 32.304  |
| 2 | 139756503 | 139858614 | 102.111 |
| 2 | 139887316 | 139914275 | 26.959  |
| 2 | 139930519 | 139930875 | 0.356   |
| 2 | 139930973 | 139931576 | 0.603   |
| 2 | 139932237 | 139953224 | 20.987  |
| 2 | 139955549 | 139978158 | 22.609  |
| 3 | 106       | 1062      | 0.956   |
| 3 | 11468     | 18940     | 7.472   |
| 3 | 26218     | 26376     | 0.158   |
| 3 | 35300     | 53086     | 17.786  |
| 3 | 60260     | 94402     | 34.142  |
| 3 | 107087    | 109368    | 2.281   |
| 3 | 109996    | 110245    | 0.249   |
| 3 | 122511    | 199554    | 77.043  |
| 3 | 199556    | 350383    | 150.827 |
| 3 | 380856    | 389119    | 8.263   |
| 3 | 389673    | 392754    | 3.081   |
| 3 | 423820    | 477458    | 53.638  |
| 3 | 485036    | 485063    | 0.027   |
| 3 | 496569    | 498364    | 1.795   |
| 3 | 500589    | 500801    | 0.212   |



|   |         |         |         |
|---|---------|---------|---------|
| 3 | 540808  | 554767  | 13.959  |
| 3 | 554790  | 554890  | 0.1     |
| 3 | 555371  | 571538  | 16.167  |
| 3 | 591615  | 597042  | 5.427   |
| 3 | 598237  | 685898  | 87.661  |
| 3 | 686477  | 694028  | 7.551   |
| 3 | 703454  | 709088  | 5.634   |
| 3 | 729036  | 730408  | 1.372   |
| 3 | 730421  | 773285  | 42.864  |
| 3 | 789956  | 827217  | 37.261  |
| 3 | 835599  | 850524  | 14.925  |
| 3 | 868399  | 877644  | 9.245   |
| 3 | 881334  | 926002  | 44.668  |
| 3 | 926996  | 927013  | 0.017   |
| 3 | 959152  | 989691  | 30.539  |
| 3 | 998852  | 999330  | 0.478   |
| 3 | 1031855 | 1063318 | 31.463  |
| 3 | 1069819 | 1070393 | 0.574   |
| 3 | 1071142 | 1080088 | 8.946   |
| 3 | 1086806 | 1096374 | 9.568   |
| 3 | 1122043 | 1122813 | 0.77    |
| 3 | 1123350 | 1123372 | 0.022   |
| 3 | 1136470 | 1231198 | 94.728  |
| 3 | 1262739 | 1295285 | 32.546  |
| 3 | 1302664 | 1321405 | 18.741  |
| 3 | 1348500 | 1362393 | 13.893  |
| 3 | 1364896 | 1367080 | 2.184   |
| 3 | 1385687 | 1467530 | 81.843  |
| 3 | 1467536 | 1469148 | 1.612   |
| 3 | 1477519 | 1505906 | 28.387  |
| 3 | 1603340 | 2017105 | 413.765 |
| 3 | 2057011 | 2089734 | 32.723  |
| 3 | 2108690 | 2161621 | 52.931  |
| 3 | 2204409 | 2208049 | 3.64    |
| 3 | 2214658 | 2323177 | 108.519 |
| 3 | 2341016 | 2471261 | 130.245 |
| 3 | 2543762 | 3089855 | 546.093 |
| 3 | 3128214 | 3128237 | 0.023   |
| 3 | 3128359 | 3143535 | 15.176  |
| 3 | 3161707 | 3205701 | 43.994  |
| 3 | 3215675 | 3215698 | 0.023   |
| 3 | 3215784 | 3216286 | 0.502   |
| 3 | 3218784 | 3220025 | 1.241   |
| 3 | 3231992 | 3234970 | 2.978   |
| 3 | 3235162 | 3236859 | 1.697   |
| 3 | 3253384 | 3256061 | 2.677   |
| 3 | 3258327 | 3322331 | 64.004  |
| 3 | 3346175 | 3358364 | 12.189  |
| 3 | 3358490 | 3358505 | 0.015   |
| 3 | 3358509 | 3374222 | 15.713  |
| 3 | 3423505 | 3488946 | 65.441  |
| 3 | 3534199 | 3539024 | 4.825   |
| 3 | 3667685 | 3691495 | 23.81   |
| 3 | 3730382 | 3773007 | 42.625  |
| 3 | 3795460 | 3863123 | 67.663  |
| 3 | 3864266 | 3865681 | 1.415   |
| 3 | 3871217 | 3900233 | 29.016  |
| 3 | 3920244 | 4191772 | 271.528 |
| 3 | 4197586 | 4197591 | 0.005   |
| 3 | 4240428 | 4317574 | 77.146  |
| 3 | 4424428 | 4580796 | 156.368 |

|   |         |         |         |
|---|---------|---------|---------|
| 3 | 4598398 | 4598410 | 0.012   |
| 3 | 4606509 | 4636563 | 30.054  |
| 3 | 4639221 | 4692398 | 53.177  |
| 3 | 4693477 | 4717044 | 23.567  |
| 3 | 4736700 | 4767133 | 30.433  |
| 3 | 4788051 | 4827094 | 39.043  |
| 3 | 4867517 | 4867519 | 0.002   |
| 3 | 4938787 | 4938797 | 0.01    |
| 3 | 4985055 | 5203589 | 218.534 |
| 3 | 5243604 | 5332986 | 89.382  |
| 3 | 5355611 | 5383245 | 27.634  |
| 3 | 5428056 | 5437116 | 9.06    |
| 3 | 5551496 | 5553627 | 2.131   |
| 3 | 5555896 | 5556029 | 0.133   |
| 3 | 5556044 | 5556648 | 0.604   |
| 3 | 5564649 | 5567800 | 3.151   |
| 3 | 5601567 | 5658269 | 56.702  |
| 3 | 5660150 | 5700898 | 40.748  |
| 3 | 5714933 | 5749309 | 34.376  |
| 3 | 5831887 | 5883009 | 51.122  |
| 3 | 5905374 | 5905554 | 0.18    |
| 3 | 6004161 | 6004189 | 0.028   |
| 3 | 6004537 | 6004613 | 0.076   |
| 3 | 6239260 | 6246700 | 7.44    |
| 3 | 6275902 | 6350563 | 74.661  |
| 3 | 6352196 | 6353105 | 0.909   |
| 3 | 6354650 | 6379546 | 24.896  |
| 3 | 6389624 | 6603155 | 213.531 |
| 3 | 6640940 | 6641072 | 0.132   |
| 3 | 6824250 | 6882444 | 58.194  |
| 3 | 6926057 | 6983167 | 57.11   |
| 3 | 7237969 | 7263776 | 25.807  |
| 3 | 7350982 | 7367855 | 16.873  |
| 3 | 7433840 | 7482024 | 48.184  |
| 3 | 7631741 | 7665362 | 33.621  |
| 3 | 7670689 | 7671121 | 0.432   |
| 3 | 7677534 | 7728167 | 50.633  |
| 3 | 7733068 | 7735775 | 2.707   |
| 3 | 7737018 | 7874340 | 137.322 |
| 3 | 7974373 | 7987483 | 13.11   |
| 3 | 8003452 | 8017719 | 14.267  |
| 3 | 8129186 | 8196225 | 67.039  |
| 3 | 8201219 | 8224117 | 22.898  |
| 3 | 8447011 | 8552444 | 105.433 |
| 3 | 8557289 | 8570239 | 12.95   |
| 3 | 8580524 | 8596619 | 16.095  |
| 3 | 8598001 | 8604293 | 6.292   |
| 3 | 8615749 | 8615765 | 0.016   |
| 3 | 8630178 | 8766800 | 136.622 |
| 3 | 8828712 | 8999315 | 170.603 |
| 3 | 8999558 | 8999842 | 0.284   |
| 3 | 9001346 | 9047942 | 46.596  |
| 3 | 9179124 | 9232435 | 53.311  |
| 3 | 9276585 | 9312524 | 35.939  |
| 3 | 9321261 | 9359152 | 37.891  |
| 3 | 9359837 | 9359901 | 0.064   |
| 3 | 9371088 | 9372220 | 1.132   |
| 3 | 9396709 | 9503744 | 107.035 |
| 3 | 9519473 | 9526527 | 7.054   |
| 3 | 9529288 | 9530489 | 1.201   |
| 3 | 9530539 | 9533781 | 3.242   |

|   |          |          |          |
|---|----------|----------|----------|
| 3 | 9570505  | 9578423  | 7.918    |
| 3 | 9581745  | 9589728  | 7.983    |
| 3 | 9611381  | 9645894  | 34.513   |
| 3 | 9703295  | 9703334  | 0.039    |
| 3 | 9734046  | 9914117  | 180.071  |
| 3 | 9949581  | 10070610 | 121.029  |
| 3 | 10209848 | 10323505 | 113.657  |
| 3 | 10451362 | 10468854 | 17.492   |
| 3 | 10540734 | 10545072 | 4.338    |
| 3 | 10581548 | 10684715 | 103.167  |
| 3 | 10684759 | 10684899 | 0.14     |
| 3 | 10687274 | 10861347 | 174.073  |
| 3 | 10882514 | 11290645 | 408.131  |
| 3 | 11302310 | 11384298 | 81.988   |
| 3 | 11384301 | 12086092 | 701.791  |
| 3 | 12192011 | 12962803 | 770.792  |
| 3 | 13105322 | 13370891 | 265.569  |
| 3 | 13390564 | 13500696 | 110.132  |
| 3 | 13708226 | 13727418 | 19.192   |
| 3 | 13739929 | 13811170 | 71.241   |
| 3 | 13874226 | 13893270 | 19.044   |
| 3 | 13903972 | 13911834 | 7.862    |
| 3 | 14003960 | 14010976 | 7.016    |
| 3 | 14035688 | 14350354 | 314.666  |
| 3 | 14409744 | 15450100 | 1040.356 |
| 3 | 15600065 | 15606277 | 6.212    |
| 3 | 15660751 | 15660938 | 0.187    |
| 3 | 15662496 | 15662622 | 0.126    |
| 3 | 15662745 | 15671959 | 9.214    |
| 3 | 15714398 | 15834406 | 120.008  |
| 3 | 15857349 | 15857554 | 0.205    |
| 3 | 15857643 | 15871079 | 13.436   |
| 3 | 15919733 | 16068736 | 149.003  |
| 3 | 16297630 | 16391946 | 94.316   |
| 3 | 16405480 | 16423397 | 17.917   |
| 3 | 16463763 | 16546615 | 82.852   |
| 3 | 16556492 | 16565527 | 9.035    |
| 3 | 16586397 | 16599341 | 12.944   |
| 3 | 16642136 | 16646731 | 4.595    |
| 3 | 16691252 | 16691451 | 0.199    |
| 3 | 16691708 | 16744927 | 53.219   |
| 3 | 16806733 | 16836217 | 29.484   |
| 3 | 16837753 | 16842641 | 4.888    |
| 3 | 17154550 | 17205287 | 50.737   |
| 3 | 17296953 | 17370696 | 73.743   |
| 3 | 17372343 | 17576728 | 204.385  |
| 3 | 17581331 | 17628352 | 47.021   |
| 3 | 17656941 | 17705894 | 48.953   |
| 3 | 17738623 | 17746446 | 7.823    |
| 3 | 18234707 | 18234725 | 0.018    |
| 3 | 19036828 | 19059089 | 22.261   |
| 3 | 19105972 | 19209773 | 103.801  |
| 3 | 19226165 | 19331553 | 105.388  |
| 3 | 19725113 | 19725150 | 0.037    |
| 3 | 19769839 | 19769856 | 0.017    |
| 3 | 19769888 | 19771731 | 1.843    |
| 3 | 19771735 | 19771925 | 0.19     |
| 3 | 19772383 | 19772634 | 0.251    |
| 3 | 19774184 | 19774341 | 0.157    |
| 3 | 19774500 | 19774532 | 0.032    |
| 3 | 19774736 | 19774757 | 0.021    |

|   |          |          |         |
|---|----------|----------|---------|
| 3 | 19774966 | 19774982 | 0.016   |
| 3 | 19775004 | 19775022 | 0.018   |
| 3 | 19801678 | 19806230 | 4.552   |
| 3 | 19808706 | 19808977 | 0.271   |
| 3 | 19810791 | 19810989 | 0.198   |
| 3 | 19817455 | 19821811 | 4.356   |
| 3 | 19845927 | 19845967 | 0.04    |
| 3 | 19849757 | 19978460 | 128.703 |
| 3 | 20037975 | 20037994 | 0.019   |
| 3 | 20039188 | 20041656 | 2.468   |
| 3 | 20042268 | 20154986 | 112.718 |
| 3 | 20156697 | 20156746 | 0.049   |
| 3 | 20157950 | 20159290 | 1.34    |
| 3 | 20325854 | 20572683 | 246.829 |
| 3 | 20605669 | 20729167 | 123.498 |
| 3 | 20809621 | 20851229 | 41.608  |
| 3 | 20963506 | 20963521 | 0.015   |
| 3 | 20985329 | 21030136 | 44.807  |
| 3 | 21087263 | 21118902 | 31.639  |
| 3 | 21427869 | 21631006 | 203.137 |
| 3 | 21650992 | 21658685 | 7.693   |
| 3 | 21704770 | 21706452 | 1.682   |
| 3 | 21727608 | 21860951 | 133.343 |
| 3 | 21958048 | 22094204 | 136.156 |
| 3 | 22094215 | 22289001 | 194.786 |
| 3 | 22392218 | 22488799 | 96.581  |
| 3 | 22541076 | 22694617 | 153.541 |
| 3 | 22918746 | 23084673 | 165.927 |
| 3 | 23216261 | 23273754 | 57.493  |
| 3 | 23460545 | 23481870 | 21.325  |
| 3 | 23530475 | 23591251 | 60.776  |
| 3 | 23696729 | 23723870 | 27.141  |
| 3 | 23734117 | 23856242 | 122.125 |
| 3 | 23893067 | 23909796 | 16.729  |
| 3 | 23995526 | 24041859 | 46.333  |
| 3 | 24075190 | 24262100 | 186.91  |
| 3 | 24262197 | 24420489 | 158.292 |
| 3 | 24446875 | 24474830 | 27.955  |
| 3 | 24497242 | 24514400 | 17.158  |
| 3 | 24524370 | 25113580 | 589.21  |
| 3 | 25149993 | 25554898 | 404.905 |
| 3 | 25660034 | 25764094 | 104.06  |
| 3 | 25786799 | 25831014 | 44.215  |
| 3 | 25834628 | 25898310 | 63.682  |
| 3 | 25918071 | 26016734 | 98.663  |
| 3 | 26023501 | 26030666 | 7.165   |
| 3 | 26037027 | 26077928 | 40.901  |
| 3 | 26112012 | 26277900 | 165.888 |
| 3 | 26302571 | 26311434 | 8.863   |
| 3 | 26318180 | 26332909 | 14.729  |
| 3 | 26339203 | 26684298 | 345.095 |
| 3 | 26742734 | 26764708 | 21.974  |
| 3 | 26967687 | 27390754 | 423.067 |
| 3 | 27391319 | 27406714 | 15.395  |
| 3 | 27493235 | 27566675 | 73.44   |
| 3 | 27599222 | 27655367 | 56.145  |
| 3 | 27656706 | 27691722 | 35.016  |
| 3 | 27739058 | 28064855 | 325.797 |
| 3 | 28087842 | 28125835 | 37.993  |
| 3 | 28134652 | 28232045 | 97.393  |
| 3 | 28237511 | 28277533 | 40.022  |

|   |          |          |         |
|---|----------|----------|---------|
| 3 | 28307124 | 28378712 | 71.588  |
| 3 | 28404430 | 28406538 | 2.108   |
| 3 | 28450462 | 28573867 | 123.405 |
| 3 | 28696757 | 28774513 | 77.756  |
| 3 | 28864954 | 28868961 | 4.007   |
| 3 | 29007216 | 29230236 | 223.02  |
| 3 | 29251071 | 29265367 | 14.296  |
| 3 | 29318338 | 29500187 | 181.849 |
| 3 | 29500222 | 29760710 | 260.488 |
| 3 | 29892645 | 29900803 | 8.158   |
| 3 | 29981320 | 30075218 | 93.898  |
| 3 | 30120502 | 30172017 | 51.515  |
| 3 | 30318380 | 30458971 | 140.591 |
| 3 | 30608752 | 30955107 | 346.355 |
| 3 | 30989738 | 31143218 | 153.48  |
| 3 | 31171833 | 31246031 | 74.198  |
| 3 | 31469512 | 31930833 | 461.321 |
| 3 | 31934346 | 31934416 | 0.07    |
| 3 | 32065872 | 32091596 | 25.724  |
| 3 | 32186049 | 32500108 | 314.059 |
| 3 | 32575677 | 32608385 | 32.708  |
| 3 | 32975225 | 33023543 | 48.318  |
| 3 | 33082369 | 33238035 | 155.666 |
| 3 | 33282353 | 33467163 | 184.81  |
| 3 | 33502200 | 33502562 | 0.362   |
| 3 | 33507868 | 33622494 | 114.626 |
| 3 | 33644047 | 33678438 | 34.391  |
| 3 | 33717426 | 33723945 | 6.519   |
| 3 | 33753006 | 33810194 | 57.188  |
| 3 | 33826620 | 33835399 | 8.779   |
| 3 | 33884253 | 33890121 | 5.868   |
| 3 | 33899249 | 33935413 | 36.164  |
| 3 | 33994291 | 34061167 | 66.876  |
| 3 | 34175973 | 34182250 | 6.277   |
| 3 | 34187131 | 34281878 | 94.747  |
| 3 | 34347702 | 34787810 | 440.108 |
| 3 | 34795603 | 34974272 | 178.669 |
| 3 | 35051302 | 35064763 | 13.461  |
| 3 | 35067225 | 35069297 | 2.072   |
| 3 | 35112706 | 35113331 | 0.625   |
| 3 | 35115724 | 35117145 | 1.421   |
| 3 | 35118056 | 35119814 | 1.758   |
| 3 | 35121563 | 35125044 | 3.481   |
| 3 | 35130750 | 35130754 | 0.004   |
| 3 | 35131498 | 35131504 | 0.006   |
| 3 | 35135875 | 35135897 | 0.022   |
| 3 | 35137582 | 35137672 | 0.09    |
| 3 | 35138599 | 35138947 | 0.348   |
| 3 | 35138981 | 35138986 | 0.005   |
| 3 | 35140702 | 35144846 | 4.144   |
| 3 | 35151449 | 35151460 | 0.011   |
| 3 | 35161517 | 35168867 | 7.35    |
| 3 | 35191498 | 35192867 | 1.369   |
| 3 | 35214175 | 35382009 | 167.834 |
| 3 | 35388659 | 35434865 | 46.206  |
| 3 | 35441817 | 35538569 | 96.752  |
| 3 | 35541567 | 35586874 | 45.307  |
| 3 | 35590653 | 35609423 | 18.77   |
| 3 | 35630388 | 35679113 | 48.725  |
| 3 | 35696935 | 35719995 | 23.06   |
| 3 | 35731625 | 35804217 | 72.592  |

|   |          |          |         |
|---|----------|----------|---------|
| 3 | 35807151 | 35815813 | 8.662   |
| 3 | 35817274 | 35821523 | 4.249   |
| 3 | 35827038 | 35876799 | 49.761  |
| 3 | 35886757 | 35924763 | 38.006  |
| 3 | 35959671 | 36053095 | 93.424  |
| 3 | 36110806 | 36118355 | 7.549   |
| 3 | 36128338 | 36179208 | 50.87   |
| 3 | 36184470 | 36185345 | 0.875   |
| 3 | 36212104 | 36215664 | 3.56    |
| 3 | 36245260 | 36270963 | 25.703  |
| 3 | 36292049 | 36397517 | 105.468 |
| 3 | 36401917 | 36647925 | 246.008 |
| 3 | 36729548 | 36807599 | 78.051  |
| 3 | 36833965 | 36927207 | 93.242  |
| 3 | 36966988 | 37083376 | 116.388 |
| 3 | 37102620 | 37135146 | 32.526  |
| 3 | 37137436 | 37166126 | 28.69   |
| 3 | 37224209 | 37224213 | 0.004   |
| 3 | 37224215 | 37224258 | 0.043   |
| 3 | 37224277 | 37224280 | 0.003   |
| 3 | 37224550 | 37224572 | 0.022   |
| 3 | 37224964 | 37225115 | 0.151   |
| 3 | 37225157 | 37225245 | 0.088   |
| 3 | 37225248 | 37225267 | 0.019   |
| 3 | 37225287 | 37225313 | 0.026   |
| 3 | 37225327 | 37225342 | 0.015   |
| 3 | 37225356 | 37225395 | 0.039   |
| 3 | 37225402 | 37225420 | 0.018   |
| 3 | 37225438 | 37225539 | 0.101   |
| 3 | 37225651 | 37225706 | 0.055   |
| 3 | 37225752 | 37225823 | 0.071   |
| 3 | 37226097 | 37226114 | 0.017   |
| 3 | 37226249 | 37226253 | 0.004   |
| 3 | 37226584 | 37226595 | 0.011   |
| 3 | 37228344 | 37228357 | 0.013   |
| 3 | 37228879 | 37228890 | 0.011   |
| 3 | 37228929 | 37228947 | 0.018   |
| 3 | 37229464 | 37229479 | 0.015   |
| 3 | 37229541 | 37230242 | 0.701   |
| 3 | 37230307 | 37230314 | 0.007   |
| 3 | 37230318 | 37230406 | 0.088   |
| 3 | 37230715 | 37230740 | 0.025   |
| 3 | 37230896 | 37231906 | 1.01    |
| 3 | 37232753 | 37233069 | 0.316   |
| 3 | 37233390 | 37233411 | 0.021   |
| 3 | 37233574 | 37233623 | 0.049   |
| 3 | 37234570 | 37248334 | 13.764  |
| 3 | 37248719 | 37735786 | 487.067 |
| 3 | 37805540 | 38129033 | 323.493 |
| 3 | 38134352 | 38206553 | 72.201  |
| 3 | 38215570 | 38369848 | 154.278 |
| 3 | 38376844 | 38664041 | 287.197 |
| 3 | 38664090 | 38713587 | 49.497  |
| 3 | 38713678 | 38714285 | 0.607   |
| 3 | 38714517 | 38714649 | 0.132   |
| 3 | 38714990 | 38718591 | 3.601   |
| 3 | 38718604 | 38718625 | 0.021   |
| 3 | 38718642 | 38718660 | 0.018   |
| 3 | 38724856 | 38724859 | 0.003   |
| 3 | 38724860 | 38725150 | 0.29    |
| 3 | 38813791 | 38822463 | 8.672   |

|   |          |          |         |
|---|----------|----------|---------|
| 3 | 38835240 | 38835342 | 0.102   |
| 3 | 38852748 | 38853333 | 0.585   |
| 3 | 38861723 | 38861753 | 0.03    |
| 3 | 38878673 | 38878717 | 0.044   |
| 3 | 38898947 | 38908887 | 9.94    |
| 3 | 38915830 | 38958143 | 42.313  |
| 3 | 38958213 | 38958720 | 0.507   |
| 3 | 38959636 | 38969544 | 9.908   |
| 3 | 38969714 | 38969732 | 0.018   |
| 3 | 38969746 | 38979105 | 9.359   |
| 3 | 38979692 | 38996251 | 16.559  |
| 3 | 38997120 | 38997217 | 0.097   |
| 3 | 39000412 | 39000590 | 0.178   |
| 3 | 39009381 | 39009410 | 0.029   |
| 3 | 39012970 | 39013124 | 0.154   |
| 3 | 39013190 | 39013211 | 0.021   |
| 3 | 39015377 | 39015401 | 0.024   |
| 3 | 39016813 | 39162104 | 145.291 |
| 3 | 39206939 | 39638874 | 431.935 |
| 3 | 39697928 | 39871122 | 173.194 |
| 3 | 39872320 | 40091515 | 219.195 |
| 3 | 40182880 | 40223582 | 40.702  |
| 3 | 40265630 | 40346506 | 80.876  |
| 3 | 40386638 | 40406808 | 20.17   |
| 3 | 40523946 | 40924828 | 400.882 |
| 3 | 40924835 | 40946038 | 21.203  |
| 3 | 40949905 | 40965935 | 16.03   |
| 3 | 41040306 | 41091722 | 51.416  |
| 3 | 41091886 | 41092127 | 0.241   |
| 3 | 41125944 | 41314542 | 188.598 |
| 3 | 41328142 | 41361591 | 33.449  |
| 3 | 41386721 | 41386904 | 0.183   |
| 3 | 41410527 | 41434138 | 23.611  |
| 3 | 41471677 | 41471848 | 0.171   |
| 3 | 41486550 | 41532304 | 45.754  |
| 3 | 41563634 | 41607874 | 44.24   |
| 3 | 41614300 | 41614452 | 0.152   |
| 3 | 41615102 | 41615156 | 0.054   |
| 3 | 41615278 | 41615300 | 0.022   |
| 3 | 41635888 | 41635923 | 0.035   |
| 3 | 41666890 | 41680557 | 13.667  |
| 3 | 41680576 | 41693127 | 12.551  |
| 3 | 41693330 | 41716022 | 22.692  |
| 3 | 41728680 | 41728827 | 0.147   |
| 3 | 41734975 | 41735084 | 0.109   |
| 3 | 41756022 | 41782234 | 26.212  |
| 3 | 41784715 | 41806056 | 21.341  |
| 3 | 41866387 | 41883142 | 16.755  |
| 3 | 41908040 | 41979837 | 71.797  |
| 3 | 42486024 | 42509546 | 23.522  |
| 3 | 42511160 | 42518443 | 7.283   |
| 3 | 42523332 | 42614753 | 91.421  |
| 3 | 42614773 | 42639109 | 24.336  |
| 3 | 42652554 | 42704970 | 52.416  |
| 3 | 42714638 | 42716861 | 2.223   |
| 3 | 42861973 | 43321517 | 459.544 |
| 3 | 43427764 | 43472145 | 44.381  |
| 3 | 43472148 | 43723151 | 251.003 |
| 3 | 43780950 | 43806618 | 25.668  |
| 3 | 43811330 | 43820601 | 9.271   |
| 3 | 43845686 | 43855258 | 9.572   |

|   |          |          |         |
|---|----------|----------|---------|
| 3 | 43873199 | 44112668 | 239.469 |
| 3 | 44116103 | 44126241 | 10.138  |
| 3 | 44204278 | 44259935 | 55.657  |
| 3 | 44382030 | 44632715 | 250.685 |
| 3 | 44642070 | 44650686 | 8.616   |
| 3 | 44684227 | 44691392 | 7.165   |
| 3 | 44694497 | 44821431 | 126.934 |
| 3 | 45186503 | 45195483 | 8.98    |
| 3 | 45195491 | 45209249 | 13.758  |
| 3 | 45603192 | 46838672 | 1235.48 |
| 3 | 46940066 | 47352641 | 412.575 |
| 3 | 47739437 | 48071680 | 332.243 |
| 3 | 48077357 | 48643807 | 566.45  |
| 3 | 48936115 | 49047739 | 111.624 |
| 3 | 49157800 | 49175883 | 18.083  |
| 3 | 49249471 | 49249498 | 0.027   |
| 3 | 49270437 | 49270455 | 0.018   |
| 3 | 49420037 | 49449920 | 29.883  |
| 3 | 49467978 | 49485787 | 17.809  |
| 3 | 49520118 | 49520124 | 0.006   |
| 3 | 49521985 | 49521994 | 0.009   |
| 3 | 49521995 | 49522006 | 0.011   |
| 3 | 49523142 | 49524649 | 1.507   |
| 3 | 49536092 | 49536108 | 0.016   |
| 3 | 49549163 | 49549168 | 0.005   |
| 3 | 49552365 | 49552376 | 0.011   |
| 3 | 49566807 | 49566832 | 0.025   |
| 3 | 49566839 | 49580177 | 13.338  |
| 3 | 49580204 | 49580228 | 0.024   |
| 3 | 49604342 | 49622168 | 17.826  |
| 3 | 49627411 | 49770511 | 143.1   |
| 3 | 49942699 | 50271569 | 328.87  |
| 3 | 50282509 | 50934071 | 651.562 |
| 3 | 50938821 | 50957233 | 18.412  |
| 3 | 50967967 | 51011036 | 43.069  |
| 3 | 51045397 | 51448555 | 403.158 |
| 3 | 51496703 | 51560980 | 64.277  |
| 3 | 51690662 | 51824291 | 133.629 |
| 3 | 51827606 | 51879394 | 51.788  |
| 3 | 51909514 | 51961009 | 51.495  |
| 3 | 51997795 | 52307331 | 309.536 |
| 3 | 52350223 | 52350264 | 0.041   |
| 3 | 52354958 | 52355938 | 0.98    |
| 3 | 52356197 | 52356353 | 0.156   |
| 3 | 52358158 | 52358181 | 0.023   |
| 3 | 52360499 | 52360510 | 0.011   |
| 3 | 52360653 | 52360913 | 0.26    |
| 3 | 52363038 | 52363045 | 0.007   |
| 3 | 52363346 | 52363356 | 0.01    |
| 3 | 52363383 | 52364006 | 0.623   |
| 3 | 52364017 | 52365082 | 1.065   |
| 3 | 52365230 | 52365261 | 0.031   |
| 3 | 52373048 | 52373819 | 0.771   |
| 3 | 52373981 | 52374548 | 0.567   |
| 3 | 52376053 | 52376084 | 0.031   |
| 3 | 52376122 | 52376795 | 0.673   |
| 3 | 52377315 | 52377361 | 0.046   |
| 3 | 52377496 | 52377523 | 0.027   |
| 3 | 52377539 | 52377574 | 0.035   |
| 3 | 52385567 | 52385651 | 0.084   |
| 3 | 52385740 | 52386568 | 0.828   |



|   |          |          |          |
|---|----------|----------|----------|
| 3 | 52386591 | 52386642 | 0.051    |
| 3 | 52391181 | 52391195 | 0.014    |
| 3 | 52391679 | 52391708 | 0.029    |
| 3 | 52392455 | 52392483 | 0.028    |
| 3 | 52625680 | 52821375 | 195.695  |
| 3 | 52871142 | 52980194 | 109.052  |
| 3 | 53122959 | 53446983 | 324.024  |
| 3 | 53596202 | 53657782 | 61.58    |
| 3 | 53664479 | 53930535 | 266.056  |
| 3 | 53935701 | 53947571 | 11.87    |
| 3 | 53982794 | 54044762 | 61.968   |
| 3 | 54065457 | 54375315 | 309.858  |
| 3 | 54396909 | 54563007 | 166.098  |
| 3 | 54662390 | 54662418 | 0.028    |
| 3 | 54890066 | 55390354 | 500.288  |
| 3 | 61881173 | 62766426 | 885.253  |
| 3 | 62826178 | 63096118 | 269.94   |
| 3 | 63139388 | 63551629 | 412.241  |
| 3 | 63551794 | 63566759 | 14.965   |
| 3 | 63567044 | 63662966 | 95.922   |
| 3 | 63764581 | 63764708 | 0.127    |
| 3 | 63797180 | 63884788 | 87.608   |
| 3 | 63913007 | 63926239 | 13.232   |
| 3 | 64020349 | 64079508 | 59.159   |
| 3 | 64096925 | 64134331 | 37.406   |
| 3 | 64730798 | 64779129 | 48.331   |
| 3 | 64822639 | 64912847 | 90.208   |
| 3 | 64969283 | 64998685 | 29.402   |
| 3 | 65017849 | 65073818 | 55.969   |
| 3 | 65256779 | 65263262 | 6.483    |
| 3 | 65289118 | 65362236 | 73.118   |
| 3 | 65732578 | 65778778 | 46.2     |
| 3 | 65790032 | 65834180 | 44.148   |
| 3 | 65871903 | 66067103 | 195.2    |
| 3 | 66089984 | 66090179 | 0.195    |
| 3 | 66090345 | 66189085 | 98.74    |
| 3 | 66339682 | 67168209 | 828.527  |
| 3 | 67262607 | 67277641 | 15.034   |
| 3 | 67357098 | 67407102 | 50.004   |
| 3 | 67613386 | 67904194 | 290.808  |
| 3 | 67917621 | 68449099 | 531.478  |
| 3 | 68461782 | 69057250 | 595.468  |
| 3 | 69187147 | 69931947 | 744.8    |
| 3 | 70000075 | 70227732 | 227.657  |
| 3 | 70289853 | 70295241 | 5.388    |
| 3 | 70308626 | 70331715 | 23.089   |
| 3 | 70352278 | 70780300 | 428.022  |
| 3 | 70943215 | 71029773 | 86.558   |
| 3 | 71373796 | 72300475 | 926.679  |
| 3 | 72310929 | 73116867 | 805.938  |
| 3 | 73172281 | 74702937 | 1530.656 |
| 3 | 75243476 | 76438808 | 1195.332 |
| 3 | 79696229 | 80033688 | 337.459  |
| 3 | 80047448 | 80232967 | 185.519  |
| 3 | 80273962 | 80692629 | 418.667  |
| 3 | 80692635 | 80746298 | 53.663   |
| 3 | 80746318 | 80759181 | 12.863   |
| 3 | 80859543 | 81036150 | 176.607  |
| 3 | 81312292 | 81733881 | 421.589  |
| 3 | 82038199 | 82509852 | 471.653  |
| 3 | 82601022 | 84847526 | 2246.504 |

|   |           |           |          |
|---|-----------|-----------|----------|
| 3 | 85016512  | 85213398  | 196.886  |
| 3 | 85232037  | 85232049  | 0.012    |
| 3 | 85238526  | 85502298  | 263.772  |
| 3 | 85507400  | 85575873  | 68.473   |
| 3 | 85603542  | 85708571  | 105.029  |
| 3 | 86247328  | 86266196  | 18.868   |
| 3 | 86577738  | 86629672  | 51.934   |
| 3 | 86682097  | 86730762  | 48.665   |
| 3 | 86825535  | 86825539  | 0.004    |
| 3 | 86848651  | 86868903  | 20.252   |
| 3 | 86868919  | 86881075  | 12.156   |
| 3 | 86888161  | 86893409  | 5.248    |
| 3 | 86898753  | 86899797  | 1.044    |
| 3 | 86928554  | 87072038  | 143.484  |
| 3 | 87110231  | 87110249  | 0.018    |
| 3 | 87110800  | 87339907  | 229.107  |
| 3 | 87349484  | 87356074  | 6.59     |
| 3 | 87359202  | 87448048  | 88.846   |
| 3 | 87488167  | 87628794  | 140.627  |
| 3 | 87639858  | 87646034  | 6.176    |
| 3 | 87646849  | 87647734  | 0.885    |
| 3 | 87705986  | 87711392  | 5.406    |
| 3 | 87714116  | 87732815  | 18.699   |
| 3 | 87762186  | 87876686  | 114.5    |
| 3 | 87904565  | 88172981  | 268.416  |
| 3 | 88173008  | 88735303  | 562.295  |
| 3 | 88767184  | 88767406  | 0.222    |
| 3 | 88832125  | 88865028  | 32.903   |
| 3 | 88913073  | 88972677  | 59.604   |
| 3 | 89059726  | 89067883  | 8.157    |
| 3 | 89110758  | 89759501  | 648.743  |
| 3 | 89825399  | 90061222  | 235.823  |
| 3 | 90274294  | 90723603  | 449.309  |
| 3 | 90732073  | 90740015  | 7.942    |
| 3 | 90749798  | 90755425  | 5.627    |
| 3 | 90778465  | 90824969  | 46.504   |
| 3 | 90868682  | 90885999  | 17.317   |
| 3 | 90890599  | 90891816  | 1.217    |
| 3 | 90924953  | 90979233  | 54.28    |
| 3 | 90981051  | 91104977  | 123.926  |
| 3 | 91117841  | 91119697  | 1.856    |
| 3 | 91123907  | 91352236  | 228.329  |
| 3 | 91404579  | 91854737  | 450.158  |
| 3 | 91857848  | 91884606  | 26.758   |
| 3 | 91894992  | 91944440  | 49.448   |
| 3 | 91945398  | 92020930  | 75.532   |
| 3 | 92110378  | 92173257  | 62.879   |
| 3 | 92639527  | 93258493  | 618.966  |
| 3 | 93358343  | 94264793  | 906.45   |
| 3 | 94268001  | 94321680  | 53.679   |
| 3 | 94391199  | 94501126  | 109.927  |
| 3 | 94632734  | 95160413  | 527.679  |
| 3 | 95177252  | 96194179  | 1016.927 |
| 3 | 96776536  | 97571915  | 795.379  |
| 3 | 97653828  | 97653859  | 0.031    |
| 3 | 97691369  | 98522088  | 830.719  |
| 3 | 98677911  | 99621414  | 943.503  |
| 3 | 99627868  | 99904044  | 276.176  |
| 3 | 99929517  | 100040254 | 110.737  |
| 3 | 100070777 | 100137294 | 66.517   |
| 3 | 100243573 | 100277018 | 33.445   |

|   |           |           |         |
|---|-----------|-----------|---------|
| 3 | 100277068 | 100300311 | 23.243  |
| 3 | 100372469 | 100476142 | 103.673 |
| 3 | 100488909 | 100531911 | 43.002  |
| 3 | 100531914 | 101136511 | 604.597 |
| 3 | 101136549 | 101136571 | 0.022   |
| 3 | 101178270 | 101361028 | 182.758 |
| 3 | 101367517 | 101376295 | 8.778   |
| 3 | 101381311 | 101391721 | 10.41   |
| 3 | 101437087 | 101509478 | 72.391  |
| 3 | 101522963 | 101637742 | 114.779 |
| 3 | 101667635 | 101711440 | 43.805  |
| 3 | 101847397 | 101849811 | 2.414   |
| 3 | 101859693 | 102013864 | 154.171 |
| 3 | 102064718 | 102167504 | 102.786 |
| 3 | 102170089 | 102202382 | 32.293  |
| 3 | 102250751 | 102635194 | 384.443 |
| 3 | 102782243 | 102929044 | 146.801 |
| 3 | 103133062 | 103160637 | 27.575  |
| 3 | 103160653 | 103160684 | 0.031   |
| 3 | 103172983 | 103183981 | 10.998  |
| 3 | 103265671 | 103317793 | 52.122  |
| 3 | 103360378 | 103494119 | 133.741 |
| 3 | 103501506 | 103501544 | 0.038   |
| 3 | 103559610 | 103706138 | 146.528 |
| 3 | 103805235 | 103948143 | 142.908 |
| 3 | 103958045 | 104112179 | 154.134 |
| 3 | 104137715 | 104266546 | 128.831 |
| 3 | 104359573 | 104365879 | 6.306   |
| 3 | 104415777 | 104420571 | 4.794   |
| 3 | 104465189 | 104465237 | 0.048   |
| 3 | 104465239 | 104493812 | 28.573  |
| 3 | 104509567 | 104514156 | 4.589   |
| 3 | 104564522 | 104630797 | 66.275  |
| 3 | 104669283 | 104682705 | 13.422  |
| 3 | 104685532 | 104758709 | 73.177  |
| 3 | 104775765 | 104830860 | 55.095  |
| 3 | 104873282 | 104911426 | 38.144  |
| 3 | 104920895 | 105071311 | 150.416 |
| 3 | 105077057 | 105089436 | 12.379  |
| 3 | 105090616 | 105107168 | 16.552  |
| 3 | 105175471 | 105175481 | 0.01    |
| 3 | 105317467 | 105345270 | 27.803  |
| 3 | 105403586 | 105782573 | 378.987 |
| 3 | 106082571 | 106147248 | 64.677  |
| 3 | 106155583 | 106325802 | 170.219 |
| 3 | 106659330 | 106792824 | 133.494 |
| 3 | 106905264 | 107042014 | 136.75  |
| 3 | 107060553 | 107081450 | 20.897  |
| 3 | 107097762 | 107185503 | 87.741  |
| 3 | 107187653 | 107247684 | 60.031  |
| 3 | 107274142 | 107285644 | 11.502  |
| 3 | 107332269 | 107419307 | 87.038  |
| 3 | 107431784 | 107874530 | 442.746 |
| 3 | 108186743 | 108722410 | 535.667 |
| 3 | 108748268 | 108905976 | 157.708 |
| 3 | 108979374 | 108989919 | 10.545  |
| 3 | 109057142 | 109070125 | 12.983  |
| 3 | 109116467 | 109293046 | 176.579 |
| 3 | 109302942 | 109313207 | 10.265  |
| 3 | 109347610 | 109347744 | 0.134   |
| 3 | 109349652 | 109605568 | 255.916 |

|   |           |           |         |
|---|-----------|-----------|---------|
| 3 | 109605598 | 109619362 | 13.764  |
| 3 | 109643456 | 109662549 | 19.093  |
| 3 | 109673278 | 109681563 | 8.285   |
| 3 | 109721380 | 109992750 | 271.37  |
| 3 | 110028374 | 110091949 | 63.575  |
| 3 | 110108656 | 110159898 | 51.242  |
| 3 | 110289178 | 110382179 | 93.001  |
| 3 | 110532944 | 110672895 | 139.951 |
| 3 | 110879740 | 110883119 | 3.379   |
| 3 | 110938755 | 111384375 | 445.62  |
| 3 | 111386925 | 111387090 | 0.165   |
| 3 | 111561575 | 111575648 | 14.073  |
| 3 | 111606697 | 111936554 | 329.857 |
| 3 | 111957458 | 111963718 | 6.26    |
| 3 | 111963729 | 112073744 | 110.015 |
| 3 | 112083001 | 112129280 | 46.279  |
| 3 | 112134439 | 112215809 | 81.37   |
| 3 | 112219648 | 112233892 | 14.244  |
| 3 | 112237864 | 112237907 | 0.043   |
| 3 | 112252072 | 112267576 | 15.504  |
| 3 | 112267701 | 112267732 | 0.031   |
| 3 | 112268053 | 112268059 | 0.006   |
| 3 | 112304653 | 112324449 | 19.796  |
| 3 | 112331124 | 112346704 | 15.58   |
| 3 | 112346709 | 112422270 | 75.561  |
| 3 | 112422317 | 112441000 | 18.683  |
| 3 | 112441012 | 112547150 | 106.138 |
| 3 | 112565426 | 112652605 | 87.179  |
| 3 | 112708468 | 112741529 | 33.061  |
| 3 | 112830040 | 112907937 | 77.897  |
| 3 | 112913451 | 112913496 | 0.045   |
| 3 | 112980419 | 113046445 | 66.026  |
| 3 | 113555553 | 113555594 | 0.041   |
| 3 | 113659492 | 113823447 | 163.955 |
| 3 | 113884439 | 113939115 | 54.676  |
| 3 | 113948015 | 114110650 | 162.635 |
| 3 | 114183059 | 115025043 | 841.984 |
| 3 | 115043224 | 115046585 | 3.361   |
| 3 | 115049974 | 115179476 | 129.502 |
| 3 | 115238805 | 115238832 | 0.027   |
| 3 | 115249970 | 115276450 | 26.48   |
| 3 | 115279390 | 115409915 | 130.525 |
| 3 | 115461607 | 115659732 | 198.125 |
| 3 | 115751655 | 115756461 | 4.806   |
| 3 | 115770965 | 115793479 | 22.514  |
| 3 | 115793591 | 115815507 | 21.916  |
| 3 | 115830832 | 115871790 | 40.958  |
| 3 | 115871856 | 115873846 | 1.99    |
| 3 | 115888677 | 115888725 | 0.048   |
| 3 | 115902075 | 115951188 | 49.113  |
| 3 | 115991780 | 115998950 | 7.17    |
| 3 | 116013415 | 116024452 | 11.037  |
| 3 | 116053261 | 116458655 | 405.394 |
| 3 | 116484532 | 116507961 | 23.429  |
| 3 | 116536702 | 116605640 | 68.938  |
| 3 | 116607019 | 116661308 | 54.289  |
| 3 | 116678434 | 116721264 | 42.83   |
| 3 | 116722550 | 116803915 | 81.365  |
| 3 | 116816945 | 116816975 | 0.03    |
| 3 | 116822819 | 116888050 | 65.231  |
| 3 | 116889870 | 116894782 | 4.912   |

|   |           |           |         |
|---|-----------|-----------|---------|
| 3 | 116914060 | 116953620 | 39.56   |
| 3 | 116958637 | 116958642 | 0.005   |
| 3 | 116958897 | 117011307 | 52.41   |
| 3 | 117031389 | 117048679 | 17.29   |
| 3 | 117247361 | 117265223 | 17.862  |
| 3 | 117320984 | 117321147 | 0.163   |
| 3 | 117345294 | 117358223 | 12.929  |
| 3 | 117362194 | 117364364 | 2.17    |
| 3 | 117393618 | 117401666 | 8.048   |
| 3 | 117424106 | 117445231 | 21.125  |
| 3 | 117452131 | 117560832 | 108.701 |
| 3 | 117569106 | 117569127 | 0.021   |
| 3 | 117607082 | 117648770 | 41.688  |
| 3 | 117668566 | 117682931 | 14.365  |
| 3 | 117723812 | 117724016 | 0.204   |
| 3 | 117724020 | 117992979 | 268.959 |
| 3 | 118007975 | 118110792 | 102.817 |
| 3 | 118234673 | 118485936 | 251.263 |
| 3 | 118500710 | 118706362 | 205.652 |
| 3 | 118710115 | 118766313 | 56.198  |
| 3 | 118794703 | 118894403 | 99.7    |
| 3 | 118894869 | 119041584 | 146.715 |
| 3 | 119041585 | 119041606 | 0.021   |
| 3 | 119175162 | 119262294 | 87.132  |
| 3 | 119279727 | 119330473 | 50.746  |
| 3 | 119430415 | 119501576 | 71.161  |
| 3 | 119620825 | 119621925 | 1.1     |
| 3 | 119859521 | 120192116 | 332.595 |
| 3 | 120240372 | 120270883 | 30.511  |
| 3 | 120503505 | 120511826 | 8.321   |
| 3 | 120511838 | 120511887 | 0.049   |
| 3 | 120522365 | 120547605 | 25.24   |
| 3 | 120553267 | 120563713 | 10.446  |
| 3 | 120675382 | 120682834 | 7.452   |
| 3 | 120719671 | 120721765 | 2.094   |
| 3 | 120762447 | 120894230 | 131.783 |
| 3 | 120954751 | 120978329 | 23.578  |
| 3 | 120999505 | 121019746 | 20.241  |
| 3 | 121021766 | 121030428 | 8.662   |
| 3 | 121031151 | 121077106 | 45.955  |
| 3 | 121079235 | 121086335 | 7.1     |
| 3 | 121120029 | 121123427 | 3.398   |
| 3 | 121144903 | 121167577 | 22.674  |
| 3 | 121174700 | 121181055 | 6.355   |
| 3 | 121283388 | 121406702 | 123.314 |
| 3 | 121417805 | 121431112 | 13.307  |
| 3 | 121432824 | 121432837 | 0.013   |
| 3 | 121553289 | 121583185 | 29.896  |
| 3 | 121592803 | 121637178 | 44.375  |
| 3 | 121808667 | 121812608 | 3.941   |
| 3 | 121813417 | 121827692 | 14.275  |
| 3 | 121843712 | 121846877 | 3.165   |
| 3 | 121854072 | 121854127 | 0.055   |
| 3 | 121854275 | 121854400 | 0.125   |
| 3 | 121855461 | 121855609 | 0.148   |
| 3 | 121857364 | 121857370 | 0.006   |
| 3 | 121857472 | 121857490 | 0.018   |
| 3 | 121860518 | 121904497 | 43.979  |
| 3 | 122730432 | 122730455 | 0.023   |
| 3 | 122862655 | 122958283 | 95.628  |
| 3 | 122966330 | 123068526 | 102.196 |

|   |           |           |        |
|---|-----------|-----------|--------|
| 3 | 123157855 | 123221031 | 63.176 |
| 3 | 123221187 | 123255792 | 34.605 |
| 3 | 123256933 | 123258819 | 1.886  |
| 3 | 123259099 | 123259144 | 0.045  |
| 3 | 123259996 | 123260057 | 0.061  |
| 3 | 123260076 | 123260111 | 0.035  |
| 3 | 123260120 | 123260165 | 0.045  |
| 3 | 123260212 | 123260222 | 0.01   |
| 3 | 123260275 | 123260358 | 0.083  |
| 3 | 123260369 | 123260532 | 0.163  |
| 3 | 123260555 | 123260638 | 0.083  |
| 3 | 123261139 | 123261645 | 0.506  |
| 3 | 123262421 | 123273651 | 11.23  |
| 3 | 123274113 | 123274163 | 0.05   |
| 3 | 123274603 | 123275150 | 0.547  |
| 3 | 123275207 | 123285180 | 9.973  |
| 3 | 123304490 | 123304602 | 0.112  |
| 3 | 123304628 | 123304650 | 0.022  |
| 3 | 123305023 | 123305159 | 0.136  |
| 3 | 123305224 | 123305305 | 0.081  |
| 3 | 123305362 | 123305373 | 0.011  |
| 3 | 123305404 | 123305466 | 0.062  |
| 3 | 123306750 | 123307188 | 0.438  |
| 3 | 123321212 | 123340474 | 19.262 |
| 3 | 123350456 | 123374001 | 23.545 |
| 3 | 123375126 | 123375454 | 0.328  |
| 3 | 123375542 | 123380778 | 5.236  |
| 3 | 123381994 | 123382058 | 0.064  |
| 3 | 123382351 | 123383267 | 0.916  |
| 3 | 123383355 | 123383371 | 0.016  |
| 3 | 123383421 | 123384599 | 1.178  |
| 3 | 123385655 | 123385701 | 0.046  |
| 3 | 123386021 | 123389361 | 3.34   |
| 3 | 123391076 | 123391220 | 0.144  |
| 3 | 123445559 | 123445660 | 0.101  |
| 3 | 123445670 | 123449546 | 3.876  |
| 3 | 123455613 | 123479962 | 24.349 |
| 3 | 123482708 | 123487825 | 5.117  |
| 3 | 123488570 | 123488622 | 0.052  |
| 3 | 123501270 | 123514475 | 13.205 |
| 3 | 123515695 | 123515800 | 0.105  |
| 3 | 123515854 | 123521612 | 5.758  |
| 3 | 123531344 | 123540754 | 9.41   |
| 3 | 123540835 | 123540958 | 0.123  |
| 3 | 123540980 | 123550349 | 9.369  |
| 3 | 123566421 | 123566973 | 0.552  |
| 3 | 123567049 | 123567051 | 0.002  |
| 3 | 123568415 | 123568507 | 0.092  |
| 3 | 123576797 | 123585195 | 8.398  |
| 3 | 123586007 | 123586035 | 0.028  |
| 3 | 123591922 | 123592034 | 0.112  |
| 4 | 9533      | 10585     | 1.052  |
| 4 | 10827     | 12500     | 1.673  |
| 4 | 12699     | 12951     | 0.252  |
| 4 | 12961     | 12964     | 0.003  |
| 4 | 13716     | 13740     | 0.024  |
| 4 | 18472     | 18595     | 0.123  |
| 4 | 19500     | 19534     | 0.034  |
| 4 | 21116     | 21136     | 0.02   |
| 4 | 21259     | 23179     | 1.92   |
| 4 | 27798     | 27910     | 0.112  |

|   |         |         |         |
|---|---------|---------|---------|
| 4 | 28267   | 28633   | 0.366   |
| 4 | 28828   | 28849   | 0.021   |
| 4 | 29430   | 29573   | 0.143   |
| 4 | 29611   | 30737   | 1.126   |
| 4 | 30742   | 30776   | 0.034   |
| 4 | 31152   | 31323   | 0.171   |
| 4 | 31431   | 32720   | 1.289   |
| 4 | 33021   | 33055   | 0.034   |
| 4 | 35096   | 36699   | 1.603   |
| 4 | 36705   | 36720   | 0.015   |
| 4 | 38175   | 39246   | 1.071   |
| 4 | 39325   | 39335   | 0.01    |
| 4 | 39352   | 39807   | 0.455   |
| 4 | 41406   | 41657   | 0.251   |
| 4 | 41759   | 41862   | 0.103   |
| 4 | 41875   | 41891   | 0.016   |
| 4 | 43656   | 43687   | 0.031   |
| 4 | 43838   | 43845   | 0.007   |
| 4 | 43890   | 43914   | 0.024   |
| 4 | 43919   | 43946   | 0.027   |
| 4 | 44143   | 44154   | 0.011   |
| 4 | 44275   | 44283   | 0.008   |
| 4 | 45014   | 45043   | 0.029   |
| 4 | 45138   | 45185   | 0.047   |
| 4 | 45196   | 45246   | 0.05    |
| 4 | 132806  | 305563  | 172.757 |
| 4 | 422020  | 455667  | 33.647  |
| 4 | 482104  | 553876  | 71.772  |
| 4 | 600551  | 604207  | 3.656   |
| 4 | 649495  | 672990  | 23.495  |
| 4 | 683711  | 693800  | 10.089  |
| 4 | 747503  | 924701  | 177.198 |
| 4 | 968089  | 1026587 | 58.498  |
| 4 | 1030144 | 1059591 | 29.447  |
| 4 | 1080781 | 1122190 | 41.409  |
| 4 | 1134519 | 1134604 | 0.085   |
| 4 | 1141970 | 1160262 | 18.292  |
| 4 | 1272764 | 1274813 | 2.049   |
| 4 | 1289164 | 1338107 | 48.943  |
| 4 | 1477328 | 1765878 | 288.55  |
| 4 | 1794580 | 1815111 | 20.531  |
| 4 | 1815804 | 2074784 | 258.98  |
| 4 | 2101588 | 2176058 | 74.47   |
| 4 | 2192700 | 2197857 | 5.157   |
| 4 | 2206344 | 2216177 | 9.833   |
| 4 | 2219898 | 2220415 | 0.517   |
| 4 | 2383464 | 2389030 | 5.566   |
| 4 | 2389303 | 2498546 | 109.243 |
| 4 | 2603614 | 2618689 | 15.075  |
| 4 | 2640803 | 2666391 | 25.588  |
| 4 | 2701031 | 2710191 | 9.16    |
| 4 | 2767250 | 2871996 | 104.746 |
| 4 | 2907564 | 2907589 | 0.025   |
| 4 | 2919472 | 2921126 | 1.654   |
| 4 | 2922357 | 2926978 | 4.621   |
| 4 | 3000656 | 3001904 | 1.248   |
| 4 | 3032763 | 3076673 | 43.91   |
| 4 | 3092864 | 3182892 | 90.028  |
| 4 | 3203913 | 3203993 | 0.08    |
| 4 | 3233160 | 3236153 | 2.993   |
| 4 | 3236266 | 3250753 | 14.487  |

|   |         |         |         |
|---|---------|---------|---------|
| 4 | 3253685 | 3264298 | 10.613  |
| 4 | 3298131 | 3298175 | 0.044   |
| 4 | 3307634 | 3318401 | 10.767  |
| 4 | 3325024 | 3350997 | 25.973  |
| 4 | 3381983 | 3416497 | 34.514  |
| 4 | 3722491 | 3722512 | 0.021   |
| 4 | 3723579 | 3723625 | 0.046   |
| 4 | 3746570 | 3879466 | 132.896 |
| 4 | 3913203 | 3947603 | 34.4    |
| 4 | 3957333 | 4014529 | 57.196  |
| 4 | 4043916 | 4081921 | 38.005  |
| 4 | 4083451 | 4603172 | 519.721 |
| 4 | 4766933 | 4834608 | 67.675  |
| 4 | 4895924 | 5057928 | 162.004 |
| 4 | 5067135 | 5067299 | 0.164   |
| 4 | 5067312 | 5096790 | 29.478  |
| 4 | 5124810 | 5124813 | 0.003   |
| 4 | 5136759 | 5206461 | 69.702  |
| 4 | 5378518 | 5583997 | 205.479 |
| 4 | 5589957 | 5638115 | 48.158  |
| 4 | 5648151 | 5648184 | 0.033   |
| 4 | 5767018 | 5777324 | 10.306  |
| 4 | 5804181 | 5810473 | 6.292   |
| 4 | 5810474 | 5914820 | 104.346 |
| 4 | 5929949 | 5949881 | 19.932  |
| 4 | 5960065 | 5960081 | 0.016   |
| 4 | 5966149 | 6015713 | 49.564  |
| 4 | 6049692 | 6058016 | 8.324   |
| 4 | 6078845 | 6190539 | 111.694 |
| 4 | 6255456 | 6400237 | 144.781 |
| 4 | 6487349 | 6530901 | 43.552  |
| 4 | 6547082 | 6574489 | 27.407  |
| 4 | 6597574 | 6621968 | 24.394  |
| 4 | 6631621 | 6650520 | 18.899  |
| 4 | 6676557 | 6713564 | 37.007  |
| 4 | 6777892 | 6781827 | 3.935   |
| 4 | 6798542 | 6818928 | 20.386  |
| 4 | 6909077 | 7004293 | 95.216  |
| 4 | 7023421 | 7121873 | 98.452  |
| 4 | 7166087 | 7188123 | 22.036  |
| 4 | 7208633 | 7212787 | 4.154   |
| 4 | 7217046 | 7228169 | 11.123  |
| 4 | 7228551 | 7228574 | 0.023   |
| 4 | 7333245 | 7541137 | 207.892 |
| 4 | 7542440 | 7542577 | 0.137   |
| 4 | 7615214 | 7666542 | 51.328  |
| 4 | 7716601 | 7738248 | 21.647  |
| 4 | 7790701 | 7790849 | 0.148   |
| 4 | 7790887 | 7816311 | 25.424  |
| 4 | 7862242 | 7901305 | 39.063  |
| 4 | 7909371 | 8032115 | 122.744 |
| 4 | 8079454 | 8291039 | 211.585 |
| 4 | 8895943 | 8958647 | 62.704  |
| 4 | 9002455 | 9046048 | 43.593  |
| 4 | 9146393 | 9280466 | 134.073 |
| 4 | 9280508 | 9309676 | 29.168  |
| 4 | 9337852 | 9429794 | 91.942  |
| 4 | 9510999 | 9519349 | 8.35    |
| 4 | 9553766 | 9560091 | 6.325   |
| 4 | 9560094 | 9772229 | 212.135 |
| 4 | 9926358 | 9937581 | 11.223  |



|   |          |          |          |
|---|----------|----------|----------|
| 4 | 9944619  | 10078341 | 133.722  |
| 4 | 10114234 | 10237189 | 122.955  |
| 4 | 10266867 | 10786074 | 519.207  |
| 4 | 10972108 | 11043660 | 71.552   |
| 4 | 11061581 | 11253803 | 192.222  |
| 4 | 11361452 | 11447248 | 85.796   |
| 4 | 11473410 | 11566398 | 92.988   |
| 4 | 11566403 | 11566544 | 0.141    |
| 4 | 11572372 | 11572378 | 0.006    |
| 4 | 11572427 | 11610405 | 37.978   |
| 4 | 11611486 | 11641070 | 29.584   |
| 4 | 11728312 | 11737136 | 8.824    |
| 4 | 11756884 | 11762126 | 5.242    |
| 4 | 11816545 | 11817174 | 0.629    |
| 4 | 11820651 | 11842018 | 21.367   |
| 4 | 11905189 | 11909962 | 4.773    |
| 4 | 11909984 | 11910001 | 0.017    |
| 4 | 11950325 | 11950375 | 0.05     |
| 4 | 11980863 | 11986451 | 5.588    |
| 4 | 12135293 | 12156662 | 21.369   |
| 4 | 12251448 | 12307615 | 56.167   |
| 4 | 12390049 | 12390189 | 0.14     |
| 4 | 12511546 | 12602940 | 91.394   |
| 4 | 12643053 | 12751019 | 107.966  |
| 4 | 13157435 | 13649293 | 491.858  |
| 4 | 13664088 | 13673251 | 9.163    |
| 4 | 13675710 | 13684240 | 8.53     |
| 4 | 13684270 | 13718512 | 34.242   |
| 4 | 13888720 | 13899693 | 10.973   |
| 4 | 13925975 | 13947083 | 21.108   |
| 4 | 13991524 | 14001604 | 10.08    |
| 4 | 14002125 | 14079602 | 77.477   |
| 4 | 14211442 | 14242418 | 30.976   |
| 4 | 14245611 | 14289096 | 43.485   |
| 4 | 14365189 | 14409221 | 44.032   |
| 4 | 14440978 | 14488688 | 47.71    |
| 4 | 14557606 | 14564085 | 6.479    |
| 4 | 14564160 | 14566121 | 1.961    |
| 4 | 14606485 | 14830143 | 223.658  |
| 4 | 14894286 | 15092922 | 198.636  |
| 4 | 15352113 | 15545030 | 192.917  |
| 4 | 15577061 | 15577226 | 0.165    |
| 4 | 15598587 | 15750373 | 151.786  |
| 4 | 15777376 | 15788908 | 11.532   |
| 4 | 15892954 | 16058676 | 165.722  |
| 4 | 16096500 | 16119544 | 23.044   |
| 4 | 16120349 | 16131958 | 11.609   |
| 4 | 16134516 | 16996735 | 862.219  |
| 4 | 17350941 | 18031932 | 680.991  |
| 4 | 18097817 | 18430510 | 332.693  |
| 4 | 18458344 | 18614354 | 156.01   |
| 4 | 18688026 | 19020541 | 332.515  |
| 4 | 19128920 | 19725034 | 596.114  |
| 4 | 19740485 | 19809253 | 68.768   |
| 4 | 19809296 | 20084051 | 274.755  |
| 4 | 20104239 | 20409360 | 305.121  |
| 4 | 20409367 | 20409382 | 0.015    |
| 4 | 20478540 | 20983036 | 504.496  |
| 4 | 20983050 | 21419240 | 436.19   |
| 4 | 28180994 | 30318553 | 2137.559 |
| 4 | 30534677 | 31636878 | 1102.201 |

|   |          |          |          |
|---|----------|----------|----------|
| 4 | 32775569 | 33039048 | 263.479  |
| 4 | 33116043 | 34088809 | 972.766  |
| 4 | 34267103 | 34348823 | 81.72    |
| 4 | 34357561 | 34387443 | 29.882   |
| 4 | 34409270 | 34674119 | 264.849  |
| 4 | 34744873 | 34769359 | 24.486   |
| 4 | 34769519 | 35462619 | 693.1    |
| 4 | 35669191 | 35841211 | 172.02   |
| 4 | 35948872 | 36331224 | 382.352  |
| 4 | 36680843 | 36885094 | 204.251  |
| 4 | 36937915 | 36937961 | 0.046    |
| 4 | 37190898 | 37628966 | 438.068  |
| 4 | 38039057 | 38566222 | 527.165  |
| 4 | 38833705 | 39079273 | 245.568  |
| 4 | 39206006 | 39245230 | 39.224   |
| 4 | 39308076 | 39308217 | 0.141    |
| 4 | 39308225 | 39514861 | 206.636  |
| 4 | 39515018 | 39670130 | 155.112  |
| 4 | 39830935 | 40434830 | 603.895  |
| 4 | 40582616 | 40848548 | 265.932  |
| 4 | 41169979 | 41432790 | 262.811  |
| 4 | 41495186 | 41885851 | 390.665  |
| 4 | 41975717 | 41990366 | 14.649   |
| 4 | 43065445 | 44160852 | 1095.407 |
| 4 | 44669949 | 45079754 | 409.805  |
| 4 | 45316239 | 45473145 | 156.906  |
| 4 | 45920336 | 45944527 | 24.191   |
| 4 | 46536089 | 46727057 | 190.968  |
| 4 | 46944101 | 47172220 | 228.119  |
| 4 | 47173063 | 47173075 | 0.012    |
| 4 | 47175618 | 47175680 | 0.062    |
| 4 | 47179452 | 47179488 | 0.036    |
| 4 | 47205208 | 47205232 | 0.024    |
| 4 | 47205240 | 47205273 | 0.033    |
| 4 | 47205290 | 47205307 | 0.017    |
| 4 | 47205402 | 47205472 | 0.07     |
| 4 | 47205488 | 47205532 | 0.044    |
| 4 | 47205545 | 47205733 | 0.188    |
| 4 | 47205886 | 47205902 | 0.016    |
| 4 | 47206105 | 47206112 | 0.007    |
| 4 | 47206274 | 47206362 | 0.088    |
| 4 | 47206373 | 47206391 | 0.018    |
| 4 | 47206405 | 47206425 | 0.02     |
| 4 | 47206495 | 47206498 | 0.003    |
| 4 | 47206506 | 47206510 | 0.004    |
| 4 | 47206575 | 47206683 | 0.108    |
| 4 | 47206745 | 47206748 | 0.003    |
| 4 | 47206869 | 47206882 | 0.013    |
| 4 | 47206892 | 47206955 | 0.063    |
| 4 | 47206956 | 47206977 | 0.021    |
| 4 | 47207066 | 47207073 | 0.007    |
| 4 | 47207219 | 47207230 | 0.011    |
| 4 | 47207239 | 47207297 | 0.058    |
| 4 | 47207361 | 47207368 | 0.007    |
| 4 | 47207513 | 47207547 | 0.034    |
| 4 | 47207567 | 47207577 | 0.01     |
| 4 | 47207593 | 47207610 | 0.017    |
| 4 | 47207634 | 47207639 | 0.005    |
| 4 | 47207721 | 47207790 | 0.069    |
| 4 | 47207923 | 47207962 | 0.039    |
| 4 | 47208334 | 47208547 | 0.213    |

|   |          |          |          |
|---|----------|----------|----------|
| 4 | 47208550 | 47208831 | 0.281    |
| 4 | 47208853 | 47208862 | 0.009    |
| 4 | 47208878 | 47208920 | 0.042    |
| 4 | 47209376 | 47209399 | 0.023    |
| 4 | 47209569 | 47209664 | 0.095    |
| 4 | 47209790 | 47209799 | 0.009    |
| 4 | 47210235 | 47210241 | 0.006    |
| 4 | 47210313 | 47210335 | 0.022    |
| 4 | 47210337 | 47210350 | 0.013    |
| 4 | 47210510 | 47210514 | 0.004    |
| 4 | 47210530 | 47210631 | 0.101    |
| 4 | 47210711 | 47210722 | 0.011    |
| 4 | 47211012 | 47211117 | 0.105    |
| 4 | 47211119 | 47211208 | 0.089    |
| 4 | 47211503 | 47211514 | 0.011    |
| 4 | 47211871 | 47213159 | 1.288    |
| 4 | 47213163 | 47213171 | 0.008    |
| 4 | 47214522 | 47214549 | 0.027    |
| 4 | 47215288 | 47216323 | 1.035    |
| 4 | 47216329 | 47216335 | 0.006    |
| 4 | 47216349 | 47219063 | 2.714    |
| 4 | 47219159 | 47219164 | 0.005    |
| 4 | 47219318 | 47219359 | 0.041    |
| 4 | 47219630 | 47219889 | 0.259    |
| 4 | 47219944 | 47219954 | 0.01     |
| 4 | 47219970 | 47219977 | 0.007    |
| 4 | 47220166 | 47220174 | 0.008    |
| 4 | 47220338 | 47220949 | 0.611    |
| 4 | 47221093 | 47221108 | 0.015    |
| 4 | 47221337 | 47221395 | 0.058    |
| 4 | 47221765 | 47221845 | 0.08     |
| 4 | 47221863 | 47221869 | 0.006    |
| 4 | 47221941 | 47221955 | 0.014    |
| 4 | 47221957 | 47222117 | 0.16     |
| 4 | 47222221 | 47222243 | 0.022    |
| 4 | 47222438 | 47222605 | 0.167    |
| 4 | 47222610 | 47222628 | 0.018    |
| 4 | 47222789 | 47222838 | 0.049    |
| 4 | 47222854 | 47222941 | 0.087    |
| 4 | 47222962 | 47222968 | 0.006    |
| 4 | 47222976 | 47223021 | 0.045    |
| 4 | 47223095 | 47223753 | 0.658    |
| 4 | 47223774 | 47223795 | 0.021    |
| 4 | 47223828 | 47223832 | 0.004    |
| 4 | 47223845 | 47223938 | 0.093    |
| 4 | 47223969 | 47223995 | 0.026    |
| 4 | 47224097 | 47224113 | 0.016    |
| 4 | 47224193 | 47224196 | 0.003    |
| 4 | 47224310 | 47224480 | 0.17     |
| 4 | 47306981 | 47528684 | 221.703  |
| 4 | 47780982 | 47796726 | 15.744   |
| 4 | 47951652 | 52457005 | 4505.353 |
| 4 | 56059746 | 57745352 | 1685.606 |
| 4 | 58842237 | 58888161 | 45.924   |
| 4 | 58888168 | 59234469 | 346.301  |
| 4 | 59560013 | 61161243 | 1601.23  |
| 4 | 61607834 | 63490224 | 1882.39  |
| 4 | 63591806 | 64672453 | 1080.647 |
| 4 | 64672460 | 65229494 | 557.034  |
| 4 | 65309521 | 65495833 | 186.312  |
| 4 | 65585470 | 65734465 | 148.995  |

|   |          |          |          |
|---|----------|----------|----------|
| 4 | 65761844 | 66534520 | 772.676  |
| 4 | 66538011 | 67455176 | 917.165  |
| 4 | 67575301 | 69189697 | 1614.396 |
| 4 | 69189707 | 69818697 | 628.99   |
| 4 | 70103522 | 70128055 | 24.533   |
| 4 | 70128072 | 71051382 | 923.31   |
| 4 | 71189428 | 71283762 | 94.334   |
| 4 | 71341628 | 71843196 | 501.568  |
| 4 | 71946499 | 71967953 | 21.454   |
| 4 | 72097995 | 72314518 | 216.523  |
| 4 | 72478720 | 72765371 | 286.651  |
| 4 | 72877702 | 72891526 | 13.824   |
| 4 | 72957366 | 72957372 | 0.006    |
| 4 | 73099650 | 73446299 | 346.649  |
| 4 | 73481350 | 73704548 | 223.198  |
| 4 | 73733690 | 73878027 | 144.337  |
| 4 | 73925477 | 73925520 | 0.043    |
| 4 | 74005365 | 74102444 | 97.079   |
| 4 | 74193970 | 74236658 | 42.688   |
| 4 | 74240078 | 74285088 | 45.01    |
| 4 | 74359956 | 74401044 | 41.088   |
| 4 | 74401053 | 74623156 | 222.103  |
| 4 | 74639713 | 74639728 | 0.015    |
| 4 | 74694668 | 74817280 | 122.612  |
| 4 | 74943382 | 75023117 | 79.735   |
| 4 | 75039883 | 75205123 | 165.24   |
| 4 | 75246540 | 75370656 | 124.116  |
| 4 | 75480272 | 75498854 | 18.582   |
| 4 | 75510163 | 75511173 | 1.01     |
| 4 | 75511186 | 75669678 | 158.492  |
| 4 | 75699973 | 75702961 | 2.988    |
| 4 | 75845719 | 77051984 | 1206.265 |
| 4 | 77238794 | 77844891 | 606.097  |
| 4 | 77879994 | 77977099 | 97.105   |
| 4 | 78239468 | 78494136 | 254.668  |
| 4 | 78669249 | 79034815 | 365.566  |
| 4 | 79138127 | 79138299 | 0.172    |
| 4 | 79138352 | 79218444 | 80.092   |
| 4 | 79252640 | 79317048 | 64.408   |
| 4 | 79615255 | 79894177 | 278.922  |
| 4 | 80241377 | 80704405 | 463.028  |
| 4 | 80711218 | 80735014 | 23.796   |
| 4 | 80780668 | 80832016 | 51.348   |
| 4 | 80861018 | 80864460 | 3.442    |
| 4 | 80865994 | 80903292 | 37.298   |
| 4 | 80962610 | 80977565 | 14.955   |
| 4 | 80993591 | 80998648 | 5.057    |
| 4 | 80998682 | 81016917 | 18.235   |
| 4 | 81027405 | 81086672 | 59.267   |
| 4 | 81086679 | 81159602 | 72.923   |
| 4 | 81197764 | 81250624 | 52.86    |
| 4 | 81263286 | 81280251 | 16.965   |
| 4 | 81315266 | 81821085 | 505.819  |
| 4 | 81822815 | 82009343 | 186.528  |
| 4 | 82009498 | 82009986 | 0.488    |
| 4 | 82390423 | 82573920 | 183.497  |
| 4 | 82575911 | 82712426 | 136.515  |
| 4 | 82806251 | 82865351 | 59.1     |
| 4 | 83005660 | 83988691 | 983.031  |
| 4 | 84038417 | 85667859 | 1629.442 |
| 4 | 86521969 | 87550099 | 1028.13  |

|   |          |          |         |
|---|----------|----------|---------|
| 4 | 88013732 | 88016004 | 2.272   |
| 4 | 88074495 | 88091331 | 16.836  |
| 4 | 88108442 | 88108447 | 0.005   |
| 4 | 88255503 | 88289009 | 33.506  |
| 4 | 88309475 | 88496146 | 186.671 |
| 4 | 88934481 | 89122932 | 188.451 |
| 4 | 89150088 | 89170332 | 20.244  |
| 4 | 89190127 | 89371382 | 181.255 |
| 4 | 89479724 | 90195685 | 715.961 |
| 4 | 90423220 | 90495917 | 72.697  |
| 4 | 90906356 | 91290279 | 383.923 |
| 4 | 91367695 | 91367715 | 0.02    |
| 4 | 91471448 | 91611381 | 139.933 |
| 4 | 91620648 | 91724041 | 103.393 |
| 4 | 91888518 | 91890479 | 1.961   |
| 4 | 91891140 | 91939683 | 48.543  |
| 4 | 91968551 | 92012565 | 44.014  |
| 4 | 92088733 | 92207924 | 119.191 |
| 4 | 92248798 | 92252190 | 3.392   |
| 4 | 92548027 | 92558230 | 10.203  |
| 4 | 92650812 | 92857567 | 206.755 |
| 4 | 92871380 | 92874644 | 3.264   |
| 4 | 93003904 | 93450762 | 446.858 |
| 4 | 93500370 | 93706810 | 206.44  |
| 4 | 93706830 | 93722317 | 15.487  |
| 4 | 93737632 | 93817189 | 79.557  |
| 4 | 93817207 | 93847662 | 30.455  |
| 4 | 93863664 | 93897904 | 34.24   |
| 4 | 93939488 | 93973630 | 34.142  |
| 4 | 93983984 | 94035974 | 51.99   |
| 4 | 94035975 | 94036150 | 0.175   |
| 4 | 94051317 | 94057702 | 6.385   |
| 4 | 94067650 | 94997241 | 929.591 |
| 4 | 95002457 | 95018622 | 16.165  |
| 4 | 95020457 | 95419927 | 399.47  |
| 4 | 95661609 | 95661761 | 0.152   |
| 4 | 95740091 | 95781461 | 41.37   |
| 4 | 95809505 | 95814214 | 4.709   |
| 4 | 95862391 | 95876236 | 13.845  |
| 4 | 95903643 | 95903663 | 0.02    |
| 4 | 95917057 | 95921902 | 4.845   |
| 4 | 95957701 | 95957737 | 0.036   |
| 4 | 96058331 | 96179355 | 121.024 |
| 4 | 96279346 | 96301563 | 22.217  |
| 4 | 96325160 | 96347955 | 22.795  |
| 4 | 96477147 | 96480312 | 3.165   |
| 4 | 96482630 | 96485071 | 2.441   |
| 4 | 96485226 | 96501609 | 16.383  |
| 4 | 96620300 | 96640445 | 20.145  |
| 4 | 96685517 | 96845545 | 160.028 |
| 4 | 96851359 | 96865933 | 14.574  |
| 4 | 96887354 | 96905432 | 18.078  |
| 4 | 96927346 | 96987388 | 60.042  |
| 4 | 97053060 | 97114249 | 61.189  |
| 4 | 97234115 | 97244609 | 10.494  |
| 4 | 97396873 | 97529025 | 132.152 |
| 4 | 97665312 | 97794585 | 129.273 |
| 4 | 97811838 | 97898822 | 86.984  |
| 4 | 97913748 | 98575977 | 662.229 |
| 4 | 98623248 | 98684010 | 60.762  |
| 4 | 98697557 | 98747118 | 49.561  |

|   |           |           |          |
|---|-----------|-----------|----------|
| 4 | 98750982  | 98819834  | 68.852   |
| 4 | 98825511  | 98945761  | 120.25   |
| 4 | 98989727  | 99008870  | 19.143   |
| 4 | 99022286  | 99071659  | 49.373   |
| 4 | 99080994  | 99327717  | 246.723  |
| 4 | 99474300  | 99570232  | 95.932   |
| 4 | 99754754  | 100029625 | 274.871  |
| 4 | 100064731 | 100065494 | 0.763    |
| 4 | 100065528 | 100066644 | 1.116    |
| 4 | 100160727 | 100171100 | 10.373   |
| 4 | 100177098 | 100188720 | 11.622   |
| 4 | 100211256 | 100271233 | 59.977   |
| 4 | 100328379 | 100385790 | 57.411   |
| 4 | 100435756 | 100702523 | 266.767  |
| 4 | 100777229 | 101076320 | 299.091  |
| 4 | 101109550 | 101799767 | 690.217  |
| 4 | 101799777 | 101799923 | 0.146    |
| 4 | 101812803 | 102465544 | 652.741  |
| 4 | 102501895 | 102752256 | 250.361  |
| 4 | 102752260 | 102762940 | 10.68    |
| 4 | 103131352 | 103298644 | 167.292  |
| 4 | 103307014 | 103523664 | 216.65   |
| 4 | 103558710 | 103964757 | 406.047  |
| 4 | 103986623 | 104002730 | 16.107   |
| 4 | 104002913 | 104115564 | 112.651  |
| 4 | 104215212 | 104559293 | 344.081  |
| 4 | 104563472 | 104564508 | 1.036    |
| 4 | 104564677 | 104585774 | 21.097   |
| 4 | 104589021 | 104592558 | 3.537    |
| 4 | 104592585 | 104593861 | 1.276    |
| 4 | 104593891 | 104612069 | 18.178   |
| 4 | 104612135 | 104615104 | 2.969    |
| 4 | 104616223 | 105340481 | 724.258  |
| 4 | 105477211 | 105495017 | 17.806   |
| 4 | 105495974 | 105574755 | 78.781   |
| 4 | 105606489 | 105632779 | 26.29    |
| 4 | 105642426 | 105654812 | 12.386   |
| 4 | 105654821 | 107050976 | 1396.155 |
| 4 | 107072735 | 107175710 | 102.975  |
| 4 | 107179235 | 107732152 | 552.917  |
| 4 | 107732182 | 107746500 | 14.318   |
| 4 | 107746545 | 107862794 | 116.249  |
| 4 | 107867689 | 107936221 | 68.532   |
| 4 | 107936232 | 108313228 | 376.996  |
| 4 | 108332385 | 108772453 | 440.068  |
| 4 | 108858438 | 109118562 | 260.124  |
| 4 | 109118566 | 109316959 | 198.393  |
| 4 | 109317128 | 109739708 | 422.58   |
| 4 | 109744874 | 110110394 | 365.52   |
| 4 | 110385865 | 110710444 | 324.579  |
| 4 | 110717114 | 110774341 | 57.227   |
| 4 | 110801252 | 111549397 | 748.145  |
| 4 | 111611557 | 112195809 | 584.252  |
| 4 | 112195812 | 112719925 | 524.113  |
| 4 | 112719945 | 112909042 | 189.097  |
| 4 | 112942807 | 112945403 | 2.596    |
| 4 | 112960261 | 112998092 | 37.831   |
| 4 | 113012255 | 113063870 | 51.615   |
| 4 | 113072454 | 113180552 | 108.098  |
| 4 | 113234922 | 113357951 | 123.029  |
| 4 | 113455025 | 113509987 | 54.962   |

|   |           |           |          |
|---|-----------|-----------|----------|
| 4 | 113554589 | 113869746 | 315.157  |
| 4 | 113971994 | 113991229 | 19.235   |
| 4 | 113991683 | 114049462 | 57.779   |
| 4 | 114075587 | 114080774 | 5.187    |
| 4 | 114081132 | 114081149 | 0.017    |
| 4 | 114081258 | 114324329 | 243.071  |
| 4 | 114324342 | 114349119 | 24.777   |
| 4 | 114353754 | 114359031 | 5.277    |
| 4 | 114393749 | 114498444 | 104.695  |
| 4 | 114498456 | 114514429 | 15.973   |
| 4 | 114516361 | 114524035 | 7.674    |
| 4 | 114701343 | 114860980 | 159.637  |
| 4 | 114923409 | 115156217 | 232.808  |
| 4 | 115157764 | 115276922 | 119.158  |
| 4 | 115323550 | 115421939 | 98.389   |
| 4 | 115429236 | 115456646 | 27.41    |
| 4 | 115496282 | 115694077 | 197.795  |
| 4 | 115694101 | 115694105 | 0.004    |
| 4 | 115701391 | 115833500 | 132.109  |
| 4 | 116067628 | 116117920 | 50.292   |
| 4 | 116140160 | 116167651 | 27.491   |
| 4 | 116167767 | 116724285 | 556.518  |
| 4 | 116771741 | 116771753 | 0.012    |
| 4 | 116903762 | 116967317 | 63.555   |
| 4 | 117038015 | 117194556 | 156.541  |
| 4 | 117265950 | 117430778 | 164.828  |
| 4 | 117474979 | 119151662 | 1676.683 |
| 4 | 122229049 | 122989447 | 760.398  |
| 4 | 122989454 | 123225075 | 235.621  |
| 4 | 123287221 | 123359129 | 71.908   |
| 4 | 123539775 | 123622691 | 82.916   |
| 4 | 123773996 | 123926230 | 152.234  |
| 4 | 124065314 | 124295885 | 230.571  |
| 4 | 124315024 | 124332382 | 17.358   |
| 4 | 124359348 | 124946437 | 587.089  |
| 4 | 124946461 | 124946711 | 0.25     |
| 4 | 125005149 | 125005155 | 0.006    |
| 4 | 125266603 | 125371718 | 105.115  |
| 4 | 125634277 | 125997126 | 362.849  |
| 4 | 126180088 | 126356629 | 176.541  |
| 4 | 126393720 | 126453073 | 59.353   |
| 4 | 126598670 | 126617130 | 18.46    |
| 4 | 126617160 | 126819258 | 202.098  |
| 4 | 126949434 | 126997260 | 47.826   |
| 4 | 127002702 | 127002736 | 0.034    |
| 4 | 127015068 | 127027546 | 12.478   |
| 4 | 127057126 | 127067019 | 9.893    |
| 4 | 127092943 | 127093261 | 0.318    |
| 4 | 127093320 | 127094675 | 1.355    |
| 4 | 127100387 | 127126571 | 26.184   |
| 4 | 127153923 | 127183988 | 30.065   |
| 4 | 127231057 | 127231201 | 0.144    |
| 4 | 127279012 | 127296970 | 17.958   |
| 4 | 127457707 | 127488328 | 30.621   |
| 4 | 127488447 | 127510351 | 21.904   |
| 4 | 127512248 | 127532053 | 19.805   |
| 4 | 127552663 | 127553201 | 0.538    |
| 4 | 127638053 | 127660657 | 22.604   |
| 4 | 127660701 | 127702383 | 41.682   |
| 4 | 127780954 | 127901816 | 120.862  |
| 4 | 127919321 | 127919473 | 0.152    |

|   |           |           |         |
|---|-----------|-----------|---------|
| 4 | 127919489 | 128058401 | 138.912 |
| 4 | 128270770 | 128270777 | 0.007   |
| 4 | 128519734 | 128519767 | 0.033   |
| 4 | 128668567 | 128734771 | 66.204  |
| 4 | 128816890 | 128952985 | 136.095 |
| 4 | 129001440 | 129022984 | 21.544  |
| 4 | 129209566 | 129210583 | 1.017   |
| 4 | 129217199 | 129293569 | 76.37   |
| 4 | 129296305 | 129362655 | 66.35   |
| 4 | 129383678 | 129386689 | 3.011   |
| 4 | 129410199 | 129464081 | 53.882  |
| 4 | 129486433 | 129494930 | 8.497   |
| 4 | 129591395 | 129623577 | 32.182  |
| 4 | 129718274 | 129732360 | 14.086  |
| 4 | 130126315 | 130126613 | 0.298   |
| 4 | 130163779 | 130201206 | 37.427  |
| 4 | 130228327 | 130394129 | 165.802 |
| 4 | 130601171 | 130601184 | 0.013   |
| 4 | 130852288 | 130852464 | 0.176   |
| 4 | 130937035 | 131496955 | 559.92  |
| 4 | 131551069 | 131703527 | 152.458 |
| 4 | 131735303 | 131855861 | 120.558 |
| 4 | 131897950 | 132027411 | 129.461 |
| 4 | 132029328 | 132216069 | 186.741 |
| 4 | 132223042 | 132403575 | 180.533 |
| 4 | 132411876 | 132722052 | 310.176 |
| 4 | 132786260 | 133438484 | 652.224 |
| 4 | 133474056 | 133509482 | 35.426  |
| 4 | 133522535 | 133525714 | 3.179   |
| 4 | 133549841 | 133550575 | 0.734   |
| 4 | 133558596 | 133558618 | 0.022   |
| 4 | 133610223 | 133899855 | 289.632 |
| 4 | 133948300 | 133985651 | 37.351  |
| 4 | 133985672 | 133995565 | 9.893   |
| 4 | 134027296 | 134229801 | 202.505 |
| 4 | 134234515 | 134234526 | 0.011   |
| 4 | 134253658 | 134322745 | 69.087  |
| 4 | 134419958 | 134422686 | 2.728   |
| 4 | 134449895 | 134465090 | 15.195  |
| 4 | 134465789 | 134517763 | 51.974  |
| 4 | 134574350 | 134649749 | 75.399  |
| 4 | 134673726 | 134679974 | 6.248   |
| 4 | 134778485 | 134778508 | 0.023   |
| 4 | 134925748 | 134975694 | 49.946  |
| 4 | 134975926 | 134985105 | 9.179   |
| 4 | 135097347 | 135097360 | 0.013   |
| 4 | 135119526 | 135193564 | 74.038  |
| 4 | 135264813 | 135287909 | 23.096  |
| 4 | 135323965 | 135391456 | 67.491  |
| 4 | 135574048 | 135788977 | 214.929 |
| 4 | 135851940 | 135863445 | 11.505  |
| 4 | 135913605 | 135945695 | 32.09   |
| 4 | 135999225 | 135999370 | 0.145   |
| 4 | 136010213 | 136020873 | 10.66   |
| 4 | 136023460 | 136031014 | 7.554   |
| 4 | 136048044 | 136048175 | 0.131   |
| 4 | 136061192 | 136147926 | 86.734  |
| 4 | 136181086 | 136181106 | 0.02    |
| 4 | 136181228 | 136181234 | 0.006   |
| 4 | 136181244 | 136181536 | 0.292   |
| 4 | 136231222 | 136239475 | 8.253   |



|   |         |         |         |
|---|---------|---------|---------|
| 5 | 1318    | 56454   | 55.136  |
| 5 | 69538   | 70620   | 1.082   |
| 5 | 70794   | 82255   | 11.461  |
| 5 | 93895   | 94981   | 1.086   |
| 5 | 100694  | 137264  | 36.57   |
| 5 | 170385  | 173888  | 3.503   |
| 5 | 204361  | 296054  | 91.693  |
| 5 | 296252  | 303522  | 7.27    |
| 5 | 307307  | 346064  | 38.757  |
| 5 | 439694  | 444629  | 4.935   |
| 5 | 444732  | 477297  | 32.565  |
| 5 | 480803  | 489209  | 8.406   |
| 5 | 506663  | 736982  | 230.319 |
| 5 | 736985  | 755299  | 18.314  |
| 5 | 755312  | 917224  | 161.912 |
| 5 | 922771  | 950621  | 27.85   |
| 5 | 961946  | 1052859 | 90.913  |
| 5 | 1056240 | 1084768 | 28.528  |
| 5 | 1117337 | 1154205 | 36.868  |
| 5 | 1174477 | 1207915 | 33.438  |
| 5 | 1212028 | 1370162 | 158.134 |
| 5 | 1370177 | 1370360 | 0.183   |
| 5 | 1387578 | 1469697 | 82.119  |
| 5 | 1470605 | 1493010 | 22.405  |
| 5 | 1512455 | 1545561 | 33.106  |
| 5 | 1548207 | 1549580 | 1.373   |
| 5 | 1554913 | 1600046 | 45.133  |
| 5 | 1603798 | 1607710 | 3.912   |
| 5 | 1608458 | 1642108 | 33.65   |
| 5 | 1670429 | 1683253 | 12.824  |
| 5 | 1695749 | 1707065 | 11.316  |
| 5 | 1735712 | 1740048 | 4.336   |
| 5 | 1742595 | 1780532 | 37.937  |
| 5 | 1787613 | 1794693 | 7.08    |
| 5 | 2029262 | 2102588 | 73.326  |
| 5 | 2108136 | 2124478 | 16.342  |
| 5 | 2156858 | 2233906 | 77.048  |
| 5 | 2242153 | 2378612 | 136.459 |
| 5 | 2401452 | 2402954 | 1.502   |
| 5 | 2410759 | 2499665 | 88.906  |
| 5 | 2510334 | 2515602 | 5.268   |
| 5 | 2565731 | 2760932 | 195.201 |
| 5 | 2762712 | 2837241 | 74.529  |
| 5 | 2851169 | 2854759 | 3.59    |
| 5 | 2857611 | 3031994 | 174.383 |
| 5 | 3039150 | 3294533 | 255.383 |
| 5 | 3322034 | 3322251 | 0.217   |
| 5 | 3322457 | 3324332 | 1.875   |
| 5 | 3324524 | 3447035 | 122.511 |
| 5 | 3473771 | 3519406 | 45.635  |
| 5 | 3519409 | 3581381 | 61.972  |
| 5 | 3711468 | 3837754 | 126.286 |
| 5 | 3873415 | 4328332 | 454.917 |
| 5 | 4392018 | 4539785 | 147.767 |
| 5 | 4539802 | 4888379 | 348.577 |
| 5 | 4890485 | 4890777 | 0.292   |
| 5 | 4921777 | 4927444 | 5.667   |
| 5 | 4930367 | 4971086 | 40.719  |
| 5 | 4972550 | 4979536 | 6.986   |
| 5 | 4984660 | 5121987 | 137.327 |
| 5 | 5194807 | 5210853 | 16.046  |

|   |          |          |         |
|---|----------|----------|---------|
| 5 | 5211460  | 5253872  | 42.412  |
| 5 | 5293933  | 5310219  | 16.286  |
| 5 | 5315640  | 5315673  | 0.033   |
| 5 | 5317735  | 5330835  | 13.1    |
| 5 | 5389160  | 5482170  | 93.01   |
| 5 | 5907480  | 5942090  | 34.61   |
| 5 | 5980863  | 6417757  | 436.894 |
| 5 | 6418203  | 6488489  | 70.286  |
| 5 | 6499917  | 6510000  | 10.083  |
| 5 | 6694523  | 6932734  | 238.211 |
| 5 | 6948472  | 6979756  | 31.284  |
| 5 | 6988526  | 7058468  | 69.942  |
| 5 | 7059925  | 7059964  | 0.039   |
| 5 | 7061930  | 7072641  | 10.711  |
| 5 | 7108319  | 7108383  | 0.064   |
| 5 | 7108543  | 7108583  | 0.04    |
| 5 | 7120191  | 7134144  | 13.953  |
| 5 | 7142053  | 7175914  | 33.861  |
| 5 | 7199422  | 7245416  | 45.994  |
| 5 | 7247664  | 7275198  | 27.534  |
| 5 | 7295474  | 7368338  | 72.864  |
| 5 | 7390001  | 7573360  | 183.359 |
| 5 | 7603481  | 7650191  | 46.71   |
| 5 | 7708564  | 7708613  | 0.049   |
| 5 | 7724396  | 7758651  | 34.255  |
| 5 | 7762294  | 7763383  | 1.089   |
| 5 | 7796096  | 7796120  | 0.024   |
| 5 | 7910232  | 8021228  | 110.996 |
| 5 | 8052584  | 8052645  | 0.061   |
| 5 | 8052648  | 8423932  | 371.284 |
| 5 | 8579734  | 8596333  | 16.599  |
| 5 | 8683264  | 8722329  | 39.065  |
| 5 | 8864849  | 8864870  | 0.021   |
| 5 | 8922287  | 8944139  | 21.852  |
| 5 | 8957030  | 9264163  | 307.133 |
| 5 | 9264167  | 9459007  | 194.84  |
| 5 | 9685468  | 9708449  | 22.981  |
| 5 | 9837917  | 9853802  | 15.885  |
| 5 | 9853805  | 9901187  | 47.382  |
| 5 | 9903822  | 9907498  | 3.676   |
| 5 | 9936380  | 9936440  | 0.06    |
| 5 | 10017886 | 10029373 | 11.487  |
| 5 | 10041045 | 10248416 | 207.371 |
| 5 | 10448537 | 10612068 | 163.531 |
| 5 | 10638291 | 10643103 | 4.812   |
| 5 | 10711165 | 10736549 | 25.384  |
| 5 | 10966915 | 10998327 | 31.412  |
| 5 | 11045584 | 11094905 | 49.321  |
| 5 | 11122385 | 11140138 | 17.753  |
| 5 | 11142475 | 11157715 | 15.24   |
| 5 | 11198650 | 11205395 | 6.745   |
| 5 | 11227442 | 11265530 | 38.088  |
| 5 | 11461104 | 11523755 | 62.651  |
| 5 | 11624818 | 11702151 | 77.333  |
| 5 | 11823348 | 11891072 | 67.724  |
| 5 | 12362945 | 12411162 | 48.217  |
| 5 | 12416515 | 12465951 | 49.436  |
| 5 | 12489771 | 12558614 | 68.843  |
| 5 | 12558780 | 12628100 | 69.32   |
| 5 | 12848993 | 12992700 | 143.707 |
| 5 | 13024334 | 13091951 | 67.617  |

|   |          |          |         |
|---|----------|----------|---------|
| 5 | 13098704 | 13201118 | 102.414 |
| 5 | 13217658 | 13217686 | 0.028   |
| 5 | 13259554 | 13437864 | 178.31  |
| 5 | 13577794 | 13647966 | 70.172  |
| 5 | 13689211 | 13691206 | 1.995   |
| 5 | 13727589 | 13915483 | 187.894 |
| 5 | 14301255 | 14346605 | 45.35   |
| 5 | 14394264 | 14399665 | 5.401   |
| 5 | 14403370 | 14634409 | 231.039 |
| 5 | 14692223 | 15013913 | 321.69  |
| 5 | 15442845 | 15519245 | 76.4    |
| 5 | 15650070 | 15731872 | 81.802  |
| 5 | 15859185 | 15927058 | 67.873  |
| 5 | 15978719 | 15987435 | 8.716   |
| 5 | 16041655 | 16055709 | 14.054  |
| 5 | 16101762 | 16124569 | 22.807  |
| 5 | 16124614 | 16124769 | 0.155   |
| 5 | 16152437 | 16155700 | 3.263   |
| 5 | 16157493 | 16190598 | 33.105  |
| 5 | 16190600 | 16211508 | 20.908  |
| 5 | 16217297 | 16217360 | 0.063   |
| 5 | 16217702 | 16226041 | 8.339   |
| 5 | 16265827 | 16331314 | 65.487  |
| 5 | 16415236 | 16453241 | 38.005  |
| 5 | 16456297 | 16487573 | 31.276  |
| 5 | 16491860 | 16544025 | 52.165  |
| 5 | 16547348 | 16556074 | 8.726   |
| 5 | 16556971 | 16570802 | 13.831  |
| 5 | 16586067 | 16626007 | 39.94   |
| 5 | 16642187 | 16644353 | 2.166   |
| 5 | 16720650 | 16736448 | 15.798  |
| 5 | 16737313 | 16743822 | 6.509   |
| 5 | 16760689 | 16784470 | 23.781  |
| 5 | 16899588 | 16908707 | 9.119   |
| 5 | 16917037 | 16939465 | 22.428  |
| 5 | 16945195 | 16971084 | 25.889  |
| 5 | 16975732 | 16979506 | 3.774   |
| 5 | 17035192 | 17076115 | 40.923  |
| 5 | 17248525 | 17487183 | 238.658 |
| 5 | 17517874 | 17517897 | 0.023   |
| 5 | 17543044 | 17543739 | 0.695   |
| 5 | 17752437 | 17752458 | 0.021   |
| 5 | 17787302 | 17846477 | 59.175  |
| 5 | 17846585 | 17856099 | 9.514   |
| 5 | 17860261 | 17910402 | 50.141  |
| 5 | 17928419 | 17988445 | 60.026  |
| 5 | 18119968 | 18159691 | 39.723  |
| 5 | 18247264 | 18874328 | 627.064 |
| 5 | 18919427 | 18980943 | 61.516  |
| 5 | 19277498 | 19277529 | 0.031   |
| 5 | 19295538 | 19295550 | 0.012   |
| 5 | 19297878 | 19297903 | 0.025   |
| 5 | 19297906 | 19298115 | 0.209   |
| 5 | 19304633 | 19341569 | 36.936  |
| 5 | 19341613 | 19341631 | 0.018   |
| 5 | 19341657 | 19359389 | 17.732  |
| 5 | 19359434 | 19359490 | 0.056   |
| 5 | 19374008 | 19869374 | 495.366 |
| 5 | 19869379 | 19869401 | 0.022   |
| 5 | 19869408 | 20035174 | 165.766 |
| 5 | 20047100 | 20048375 | 1.275   |

|   |          |          |          |
|---|----------|----------|----------|
| 5 | 20147482 | 20369268 | 221.786  |
| 5 | 20458152 | 20671788 | 213.636  |
| 5 | 20719370 | 21373856 | 654.486  |
| 5 | 21982095 | 22040082 | 57.987   |
| 5 | 22094443 | 22840420 | 745.977  |
| 5 | 22840432 | 23017364 | 176.932  |
| 5 | 23057344 | 23277569 | 220.225  |
| 5 | 23288996 | 24074802 | 785.806  |
| 5 | 27799827 | 28803547 | 1003.72  |
| 5 | 30105258 | 30452548 | 347.29   |
| 5 | 30524464 | 30570349 | 45.885   |
| 5 | 30717516 | 31165760 | 448.244  |
| 5 | 31235457 | 31320649 | 85.192   |
| 5 | 31459060 | 31559551 | 100.491  |
| 5 | 31562948 | 33273521 | 1710.573 |
| 5 | 33380912 | 34569783 | 1188.871 |
| 5 | 35532579 | 37522559 | 1989.98  |
| 5 | 37676479 | 39357838 | 1681.359 |
| 5 | 40611501 | 41996012 | 1384.511 |
| 5 | 42261847 | 42629716 | 367.869  |
| 5 | 42918640 | 43192212 | 273.572  |
| 5 | 43364535 | 44676096 | 1311.561 |
| 5 | 45062458 | 45908456 | 845.998  |
| 5 | 46473382 | 47410209 | 936.827  |
| 5 | 54605503 | 55496365 | 890.862  |
| 5 | 55554309 | 55910548 | 356.239  |
| 5 | 55958079 | 55958204 | 0.125    |
| 5 | 55962105 | 55993072 | 30.967   |
| 5 | 55993118 | 56041901 | 48.783   |
| 5 | 56054851 | 56068826 | 13.975   |
| 5 | 56098903 | 56500444 | 401.541  |
| 5 | 56542657 | 56545035 | 2.378    |
| 5 | 56657911 | 56863367 | 205.456  |
| 5 | 56885350 | 56959436 | 74.086   |
| 5 | 57005478 | 57006680 | 1.202    |
| 5 | 57071561 | 57155361 | 83.8     |
| 5 | 57393391 | 57716223 | 322.832  |
| 5 | 57861946 | 57925818 | 63.872   |
| 5 | 57984666 | 58018917 | 34.251   |
| 5 | 58554204 | 58899590 | 345.386  |
| 5 | 58947593 | 59123354 | 175.761  |
| 5 | 59227995 | 59233749 | 5.754    |
| 5 | 59707598 | 59731424 | 23.826   |
| 5 | 59759694 | 59865586 | 105.892  |
| 5 | 59879457 | 59951506 | 72.049   |
| 5 | 59975531 | 60030418 | 54.887   |
| 5 | 60053091 | 60095061 | 41.97    |
| 5 | 60129126 | 60412901 | 283.775  |
| 5 | 60414421 | 60426538 | 12.117   |
| 5 | 60426555 | 60444680 | 18.125   |
| 5 | 60560252 | 60570726 | 10.474   |
| 5 | 60570738 | 60593211 | 22.473   |
| 5 | 60665937 | 60732218 | 66.281   |
| 5 | 60732228 | 60746257 | 14.029   |
| 5 | 60810901 | 60834705 | 23.804   |
| 5 | 60834848 | 60958250 | 123.402  |
| 5 | 60964613 | 60974936 | 10.323   |
| 5 | 60995052 | 61028404 | 33.352   |
| 5 | 61044316 | 61070496 | 26.18    |
| 5 | 61070512 | 61097829 | 27.317   |
| 5 | 61106236 | 61114504 | 8.268    |

|   |          |          |          |
|---|----------|----------|----------|
| 5 | 61175798 | 61266154 | 90.356   |
| 5 | 61282350 | 61294660 | 12.31    |
| 5 | 61377721 | 61378392 | 0.671    |
| 5 | 61378438 | 61444118 | 65.68    |
| 5 | 61444132 | 61445442 | 1.31     |
| 5 | 61445491 | 61578852 | 133.361  |
| 5 | 61661404 | 61889380 | 227.976  |
| 5 | 61910682 | 61915797 | 5.115    |
| 5 | 61997383 | 62014838 | 17.455   |
| 5 | 62017494 | 62017504 | 0.01     |
| 5 | 62096798 | 62626316 | 529.518  |
| 5 | 62686147 | 62751979 | 65.832   |
| 5 | 62763424 | 62774500 | 11.076   |
| 5 | 62786125 | 62798260 | 12.135   |
| 5 | 62828289 | 62847189 | 18.9     |
| 5 | 62867147 | 62873951 | 6.804    |
| 5 | 62889092 | 62903780 | 14.688   |
| 5 | 62949761 | 62979683 | 29.922   |
| 5 | 63005178 | 63005477 | 0.299    |
| 5 | 63009305 | 63028502 | 19.197   |
| 5 | 63037104 | 63061941 | 24.837   |
| 5 | 63158011 | 63218283 | 60.272   |
| 5 | 63230843 | 63252774 | 21.931   |
| 5 | 63265550 | 63288765 | 23.215   |
| 5 | 63304953 | 63339725 | 34.772   |
| 5 | 63357562 | 63363588 | 6.026    |
| 5 | 63413390 | 63519038 | 105.648  |
| 5 | 63599117 | 63682878 | 83.761   |
| 5 | 63684540 | 64373936 | 689.396  |
| 5 | 64377177 | 64380298 | 3.121    |
| 5 | 64388013 | 64407587 | 19.574   |
| 5 | 64510892 | 64526923 | 16.031   |
| 5 | 64588045 | 64595816 | 7.771    |
| 5 | 64602700 | 64614381 | 11.681   |
| 5 | 64751539 | 64796566 | 45.027   |
| 5 | 64801282 | 64843132 | 41.85    |
| 5 | 64845661 | 64864425 | 18.764   |
| 5 | 64873273 | 64895326 | 22.053   |
| 5 | 64925561 | 64966453 | 40.892   |
| 5 | 64979911 | 64990513 | 10.602   |
| 5 | 64993841 | 65000125 | 6.284    |
| 5 | 65010845 | 65012625 | 1.78     |
| 5 | 65065887 | 65082919 | 17.032   |
| 5 | 65095614 | 65112777 | 17.163   |
| 5 | 65122717 | 65130682 | 7.965    |
| 5 | 65136356 | 65154575 | 18.219   |
| 5 | 65162938 | 65183736 | 20.798   |
| 5 | 65217184 | 65222974 | 5.79     |
| 5 | 65223023 | 65301350 | 78.327   |
| 5 | 65579130 | 65606649 | 27.519   |
| 5 | 65748708 | 65853266 | 104.558  |
| 5 | 65907362 | 65929042 | 21.68    |
| 5 | 66231134 | 66389157 | 158.023  |
| 5 | 66396846 | 66725591 | 328.745  |
| 5 | 66958874 | 67375335 | 416.461  |
| 5 | 67375437 | 67664961 | 289.524  |
| 5 | 67721794 | 67921155 | 199.361  |
| 5 | 69530310 | 70789935 | 1259.625 |
| 5 | 70926844 | 70998493 | 71.649   |
| 5 | 71137438 | 71349063 | 211.625  |
| 5 | 71349589 | 71349912 | 0.323    |

|   |          |          |          |
|---|----------|----------|----------|
| 5 | 71360743 | 71459265 | 98.522   |
| 5 | 71459363 | 71564650 | 105.287  |
| 5 | 71801895 | 71857755 | 55.86    |
| 5 | 72021762 | 72151704 | 129.942  |
| 5 | 72151723 | 72217784 | 66.061   |
| 5 | 72346083 | 72804605 | 458.522  |
| 5 | 73066250 | 73080396 | 14.146   |
| 5 | 73183739 | 73219900 | 36.161   |
| 5 | 73280202 | 73281610 | 1.408    |
| 5 | 73317637 | 73331314 | 13.677   |
| 5 | 73348526 | 73389353 | 40.827   |
| 5 | 73431047 | 73484621 | 53.574   |
| 5 | 73507322 | 73507336 | 0.014    |
| 5 | 73537500 | 73626676 | 89.176   |
| 5 | 73643691 | 73651682 | 7.991    |
| 5 | 73680962 | 74381965 | 701.003  |
| 5 | 74407441 | 74407500 | 0.059    |
| 5 | 74466495 | 74822198 | 355.703  |
| 5 | 74878060 | 75044308 | 166.248  |
| 5 | 75092818 | 75092900 | 0.082    |
| 5 | 75117938 | 75179703 | 61.765   |
| 5 | 75534246 | 75903145 | 368.899  |
| 5 | 76031466 | 76058102 | 26.636   |
| 5 | 76058505 | 76085434 | 26.929   |
| 5 | 76329534 | 76756315 | 426.781  |
| 5 | 76775572 | 77995762 | 1220.19  |
| 5 | 77995774 | 78913470 | 917.696  |
| 5 | 79761249 | 79761274 | 0.025    |
| 5 | 79885512 | 80453437 | 567.925  |
| 5 | 80453439 | 80492908 | 39.469   |
| 5 | 80595868 | 80648666 | 52.798   |
| 5 | 80812113 | 81636487 | 824.374  |
| 5 | 81896271 | 81896286 | 0.015    |
| 5 | 82024352 | 82564402 | 540.05   |
| 5 | 82579019 | 82594308 | 15.289   |
| 5 | 82615842 | 83623547 | 1007.705 |
| 5 | 83630529 | 83696805 | 66.276   |
| 5 | 83728452 | 83777751 | 49.299   |
| 5 | 83854933 | 84004627 | 149.694  |
| 5 | 84077977 | 84349517 | 271.54   |
| 5 | 84379453 | 84381362 | 1.909    |
| 5 | 84433873 | 84476580 | 42.707   |
| 5 | 84528682 | 84588642 | 59.96    |
| 5 | 84668001 | 85100276 | 432.275  |
| 5 | 85123381 | 85141164 | 17.783   |
| 5 | 85200938 | 85578335 | 377.397  |
| 5 | 85578353 | 85665762 | 87.409   |
| 5 | 85671499 | 85863935 | 192.436  |
| 5 | 85927763 | 86627880 | 700.117  |
| 5 | 86670520 | 87306720 | 636.2    |
| 5 | 87802842 | 88154234 | 351.392  |
| 5 | 88291788 | 88531155 | 239.367  |
| 5 | 88745739 | 88809676 | 63.937   |
| 5 | 88830373 | 88830396 | 0.023    |
| 5 | 88841989 | 88868427 | 26.438   |
| 5 | 88894368 | 88906923 | 12.555   |
| 5 | 88911200 | 89542370 | 631.17   |
| 5 | 89624338 | 90126967 | 502.629  |
| 5 | 90846644 | 92549414 | 1702.77  |
| 5 | 92864439 | 93406497 | 542.058  |
| 5 | 93562675 | 93778125 | 215.45   |

|   |           |           |          |
|---|-----------|-----------|----------|
| 5 | 93963328  | 95403369  | 1440.041 |
| 5 | 95436611  | 95448980  | 12.369   |
| 5 | 95475712  | 95513720  | 38.008   |
| 5 | 95691391  | 95817683  | 126.292  |
| 5 | 95870909  | 96090094  | 219.185  |
| 5 | 96167200  | 96305314  | 138.114  |
| 5 | 96310377  | 96356259  | 45.882   |
| 5 | 96395128  | 96449208  | 54.08    |
| 5 | 96449234  | 96449243  | 0.009    |
| 5 | 96612414  | 96701137  | 88.723   |
| 5 | 96701169  | 96715201  | 14.032   |
| 5 | 96801691  | 96938890  | 137.199  |
| 5 | 97016754  | 97161419  | 144.665  |
| 5 | 97192343  | 97284173  | 91.83    |
| 5 | 97339877  | 97548958  | 209.081  |
| 5 | 97648776  | 97678378  | 29.602   |
| 5 | 97944418  | 98055507  | 111.089  |
| 5 | 98072672  | 98518534  | 445.862  |
| 5 | 98519574  | 98659884  | 140.31   |
| 5 | 98746576  | 98822431  | 75.855   |
| 5 | 98822624  | 98862667  | 40.043   |
| 5 | 98875794  | 98875968  | 0.174    |
| 5 | 98890704  | 98948967  | 58.263   |
| 5 | 98963928  | 98979519  | 15.591   |
| 5 | 99062901  | 99155591  | 92.69    |
| 5 | 99214903  | 99214930  | 0.027    |
| 5 | 99364296  | 99395418  | 31.122   |
| 5 | 99404298  | 99466471  | 62.173   |
| 5 | 99618000  | 99654412  | 36.412   |
| 5 | 99655243  | 99696818  | 41.575   |
| 5 | 99698302  | 99734054  | 35.752   |
| 5 | 99741144  | 99753641  | 12.497   |
| 5 | 99765043  | 99820269  | 55.226   |
| 5 | 99839278  | 99845549  | 6.271    |
| 5 | 99845558  | 99867840  | 22.282   |
| 5 | 99888974  | 99903388  | 14.414   |
| 5 | 99921956  | 100005863 | 83.907   |
| 5 | 100018412 | 100018423 | 0.011    |
| 5 | 100028836 | 100115370 | 86.534   |
| 5 | 100117825 | 100120744 | 2.919    |
| 5 | 100123103 | 100133929 | 10.826   |
| 5 | 100143836 | 100166124 | 22.288   |
| 5 | 100188243 | 100194464 | 6.221    |
| 5 | 100240836 | 100247116 | 6.28     |
| 5 | 100264169 | 100270352 | 6.183    |
| 5 | 100292987 | 100299515 | 6.528    |
| 5 | 100305647 | 100319444 | 13.797   |
| 5 | 100320444 | 100357756 | 37.312   |
| 5 | 100372369 | 100372410 | 0.041    |
| 5 | 100440806 | 100512361 | 71.555   |
| 6 | 5870      | 14712     | 8.842    |
| 6 | 31423     | 201049    | 169.626  |
| 6 | 242073    | 242194    | 0.121    |
| 6 | 242336    | 243577    | 1.241    |
| 6 | 244123    | 246940    | 2.817    |
| 6 | 246942    | 247294    | 0.352    |
| 6 | 247432    | 255535    | 8.103    |
| 6 | 255537    | 255587    | 0.05     |
| 6 | 255606    | 255609    | 0.003    |
| 6 | 279303    | 293848    | 14.545   |
| 6 | 293863    | 294644    | 0.781    |

|   |         |         |         |
|---|---------|---------|---------|
| 6 | 350164  | 372057  | 21.893  |
| 6 | 412314  | 412959  | 0.645   |
| 6 | 445687  | 445819  | 0.132   |
| 6 | 447240  | 458615  | 11.375  |
| 6 | 479927  | 489038  | 9.111   |
| 6 | 517332  | 543006  | 25.674  |
| 6 | 552163  | 562523  | 10.36   |
| 6 | 564744  | 564875  | 0.131   |
| 6 | 564884  | 570846  | 5.962   |
| 6 | 577589  | 579811  | 2.222   |
| 6 | 583663  | 600869  | 17.206  |
| 6 | 603736  | 603775  | 0.039   |
| 6 | 603782  | 603817  | 0.035   |
| 6 | 603862  | 603923  | 0.061   |
| 6 | 606569  | 606583  | 0.014   |
| 6 | 631341  | 642819  | 11.478  |
| 6 | 645436  | 645593  | 0.157   |
| 6 | 701543  | 701729  | 0.186   |
| 6 | 756638  | 771248  | 14.61   |
| 6 | 771279  | 771434  | 0.155   |
| 6 | 790942  | 805333  | 14.391  |
| 6 | 868838  | 868851  | 0.013   |
| 6 | 868852  | 883866  | 15.014  |
| 6 | 1045350 | 1084198 | 38.848  |
| 6 | 1102086 | 1124401 | 22.315  |
| 6 | 1158451 | 1170492 | 12.041  |
| 6 | 1181004 | 1226562 | 45.558  |
| 6 | 1233822 | 1251905 | 18.083  |
| 6 | 1285823 | 1286019 | 0.196   |
| 6 | 1315640 | 1324638 | 8.998   |
| 6 | 1344681 | 1352019 | 7.338   |
| 6 | 1373406 | 1381331 | 7.925   |
| 6 | 1404504 | 1413414 | 8.91    |
| 6 | 1413890 | 1462931 | 49.041  |
| 6 | 1475518 | 1488989 | 13.471  |
| 6 | 1505257 | 1506381 | 1.124   |
| 6 | 1547732 | 1549910 | 2.178   |
| 6 | 1554550 | 1575129 | 20.579  |
| 6 | 1659612 | 1778734 | 119.122 |
| 6 | 1784874 | 1789336 | 4.462   |
| 6 | 1802525 | 1802685 | 0.16    |
| 6 | 1814144 | 1960331 | 146.187 |
| 6 | 1980399 | 1987938 | 7.539   |
| 6 | 2005314 | 2005444 | 0.13    |
| 6 | 2015714 | 2018244 | 2.53    |
| 6 | 2018464 | 2023743 | 5.279   |
| 6 | 2044052 | 2046041 | 1.989   |
| 6 | 2056018 | 2076238 | 20.22   |
| 6 | 2082794 | 2083994 | 1.2     |
| 6 | 2084021 | 2084288 | 0.267   |
| 6 | 2090767 | 2090814 | 0.047   |
| 6 | 2096025 | 2112621 | 16.596  |
| 6 | 2112664 | 2117526 | 4.862   |
| 6 | 2117542 | 2129401 | 11.859  |
| 6 | 2129878 | 2134257 | 4.379   |
| 6 | 2138814 | 2169788 | 30.974  |
| 6 | 2195175 | 2195185 | 0.01    |
| 6 | 2197568 | 2207701 | 10.133  |
| 6 | 2210776 | 2254896 | 44.12   |
| 6 | 2255657 | 2264145 | 8.488   |
| 6 | 2278895 | 2282756 | 3.861   |



|   |         |         |         |
|---|---------|---------|---------|
| 6 | 2319897 | 2371174 | 51.277  |
| 6 | 2413950 | 2429604 | 15.654  |
| 6 | 2437782 | 2451454 | 13.672  |
| 6 | 2461841 | 2461863 | 0.022   |
| 6 | 2475427 | 2475479 | 0.052   |
| 6 | 2482255 | 2482279 | 0.024   |
| 6 | 2552910 | 2559419 | 6.509   |
| 6 | 2560905 | 2734307 | 173.402 |
| 6 | 2775593 | 2978149 | 202.556 |
| 6 | 2998471 | 3093268 | 94.797  |
| 6 | 3139374 | 3196770 | 57.396  |
| 6 | 3196782 | 3201158 | 4.376   |
| 6 | 3233114 | 3374049 | 140.935 |
| 6 | 3390302 | 3420379 | 30.077  |
| 6 | 3420551 | 3440612 | 20.061  |
| 6 | 3466990 | 3493889 | 26.899  |
| 6 | 3608463 | 3625514 | 17.051  |
| 6 | 3659121 | 3742148 | 83.027  |
| 6 | 4256790 | 4316016 | 59.226  |
| 6 | 4316017 | 4359913 | 43.896  |
| 6 | 4449632 | 4449656 | 0.024   |
| 6 | 4502719 | 4530558 | 27.839  |
| 6 | 4567584 | 4646228 | 78.644  |
| 6 | 4661038 | 4677517 | 16.479  |
| 6 | 4707506 | 4773264 | 65.758  |
| 6 | 4785200 | 4790611 | 5.411   |
| 6 | 4793349 | 4805048 | 11.699  |
| 6 | 4808757 | 4808926 | 0.169   |
| 6 | 4818283 | 4840927 | 22.644  |
| 6 | 4841737 | 4842827 | 1.09    |
| 6 | 4853183 | 4860683 | 7.5     |
| 6 | 4872705 | 4877481 | 4.776   |
| 6 | 4888936 | 4908879 | 19.943  |
| 6 | 4921446 | 4941284 | 19.838  |
| 6 | 4952117 | 4952227 | 0.11    |
| 6 | 4959813 | 4976442 | 16.629  |
| 6 | 4976746 | 5000843 | 24.097  |
| 6 | 5043543 | 5047316 | 3.773   |
| 6 | 5098454 | 5104947 | 6.493   |
| 6 | 5132738 | 5132761 | 0.023   |
| 6 | 5132796 | 5132819 | 0.023   |
| 6 | 5133134 | 5133148 | 0.014   |
| 6 | 5133239 | 5133241 | 0.002   |
| 6 | 5133255 | 5133277 | 0.022   |
| 6 | 5133283 | 5133306 | 0.023   |
| 6 | 5133510 | 5133517 | 0.007   |
| 6 | 5133647 | 5133659 | 0.012   |
| 6 | 5133743 | 5133753 | 0.01    |
| 6 | 5133776 | 5133824 | 0.048   |
| 6 | 5134029 | 5134033 | 0.004   |
| 6 | 5134043 | 5134055 | 0.012   |
| 6 | 5134215 | 5134284 | 0.069   |
| 6 | 5134372 | 5134415 | 0.043   |
| 6 | 5134450 | 5134485 | 0.035   |
| 6 | 5134574 | 5134624 | 0.05    |
| 6 | 5134698 | 5134709 | 0.011   |
| 6 | 5134826 | 5134840 | 0.014   |
| 6 | 5135003 | 5135041 | 0.038   |
| 6 | 5135194 | 5135204 | 0.01    |
| 6 | 5135583 | 5135761 | 0.178   |
| 6 | 5135897 | 5135900 | 0.003   |

|   |         |         |       |
|---|---------|---------|-------|
| 6 | 5135969 | 5136087 | 0.118 |
| 6 | 5136094 | 5136203 | 0.109 |
| 6 | 5136229 | 5136235 | 0.006 |
| 6 | 5136280 | 5136293 | 0.013 |
| 6 | 5136325 | 5136335 | 0.01  |
| 6 | 5136337 | 5136543 | 0.206 |
| 6 | 5136546 | 5136553 | 0.007 |
| 6 | 5136566 | 5136572 | 0.006 |
| 6 | 5136587 | 5136608 | 0.021 |
| 6 | 5136618 | 5136626 | 0.008 |
| 6 | 5136765 | 5136773 | 0.008 |
| 6 | 5136895 | 5136921 | 0.026 |
| 6 | 5137111 | 5137137 | 0.026 |
| 6 | 5137160 | 5137256 | 0.096 |
| 6 | 5137261 | 5137309 | 0.048 |
| 6 | 5137314 | 5137368 | 0.054 |
| 6 | 5137467 | 5137473 | 0.006 |
| 6 | 5137548 | 5137561 | 0.013 |
| 6 | 5137817 | 5137826 | 0.009 |
| 6 | 5137855 | 5137859 | 0.004 |
| 6 | 5137971 | 5138014 | 0.043 |
| 6 | 5138167 | 5138181 | 0.014 |
| 6 | 5138326 | 5138334 | 0.008 |
| 6 | 5165894 | 5165958 | 0.064 |
| 6 | 5165987 | 5166014 | 0.027 |
| 6 | 5166192 | 5166222 | 0.03  |
| 6 | 5166297 | 5166302 | 0.005 |
| 6 | 5166322 | 5166328 | 0.006 |
| 6 | 5166384 | 5166425 | 0.041 |
| 6 | 5166448 | 5166484 | 0.036 |
| 6 | 5166498 | 5166504 | 0.006 |
| 6 | 5166582 | 5166593 | 0.011 |
| 6 | 5166622 | 5166647 | 0.025 |
| 6 | 5166738 | 5166744 | 0.006 |
| 6 | 5166781 | 5166796 | 0.015 |
| 6 | 5166825 | 5166832 | 0.007 |
| 6 | 5166841 | 5166857 | 0.016 |
| 6 | 5166894 | 5166915 | 0.021 |
| 6 | 5166960 | 5166978 | 0.018 |
| 6 | 5167058 | 5167078 | 0.02  |
| 6 | 5167082 | 5167088 | 0.006 |
| 6 | 5167103 | 5167145 | 0.042 |
| 6 | 5167187 | 5167203 | 0.016 |
| 6 | 5167205 | 5167290 | 0.085 |
| 6 | 5167344 | 5167356 | 0.012 |
| 6 | 5167449 | 5167461 | 0.012 |
| 6 | 5167535 | 5167553 | 0.018 |
| 6 | 5167603 | 5167625 | 0.022 |
| 6 | 5167678 | 5167685 | 0.007 |
| 6 | 5167732 | 5167737 | 0.005 |
| 6 | 5167741 | 5167750 | 0.009 |
| 6 | 5167822 | 5167850 | 0.028 |
| 6 | 5167884 | 5167902 | 0.018 |
| 6 | 5167945 | 5167962 | 0.017 |
| 6 | 5167969 | 5167980 | 0.011 |
| 6 | 5167981 | 5167988 | 0.007 |
| 6 | 5168100 | 5168113 | 0.013 |
| 6 | 5168315 | 5168331 | 0.016 |
| 6 | 5168347 | 5168351 | 0.004 |
| 6 | 5168389 | 5168395 | 0.006 |
| 6 | 5168486 | 5168536 | 0.05  |

|   |         |         |       |
|---|---------|---------|-------|
| 6 | 5168601 | 5168613 | 0.012 |
| 6 | 5168618 | 5168631 | 0.013 |
| 6 | 5168639 | 5168644 | 0.005 |
| 6 | 5168817 | 5168831 | 0.014 |
| 6 | 5168835 | 5168856 | 0.021 |
| 6 | 5168885 | 5168921 | 0.036 |
| 6 | 5168946 | 5169010 | 0.064 |
| 6 | 5169013 | 5169024 | 0.011 |
| 6 | 5169091 | 5169104 | 0.013 |
| 6 | 5169181 | 5169189 | 0.008 |
| 6 | 5169193 | 5169209 | 0.016 |
| 6 | 5169220 | 5169286 | 0.066 |
| 6 | 5169309 | 5169353 | 0.044 |
| 6 | 5169427 | 5169441 | 0.014 |
| 6 | 5169505 | 5169560 | 0.055 |
| 6 | 5169585 | 5169591 | 0.006 |
| 6 | 5169788 | 5169872 | 0.084 |
| 6 | 5169925 | 5169933 | 0.008 |
| 6 | 5170028 | 5170035 | 0.007 |
| 6 | 5170042 | 5170147 | 0.105 |
| 6 | 5170224 | 5170258 | 0.034 |
| 6 | 5170260 | 5170291 | 0.031 |
| 6 | 5170321 | 5170337 | 0.016 |
| 6 | 5170355 | 5170359 | 0.004 |
| 6 | 5170378 | 5170391 | 0.013 |
| 6 | 5170416 | 5170424 | 0.008 |
| 6 | 5170468 | 5170476 | 0.008 |
| 6 | 5170552 | 5170570 | 0.018 |
| 6 | 5170585 | 5170621 | 0.036 |
| 6 | 5170623 | 5170626 | 0.003 |
| 6 | 5170633 | 5170637 | 0.004 |
| 6 | 5170675 | 5170700 | 0.025 |
| 6 | 5170774 | 5170777 | 0.003 |
| 6 | 5170792 | 5170806 | 0.014 |
| 6 | 5170815 | 5170844 | 0.029 |
| 6 | 5170849 | 5170894 | 0.045 |
| 6 | 5170952 | 5171099 | 0.147 |
| 6 | 5171155 | 5171176 | 0.021 |
| 6 | 5171178 | 5171228 | 0.05  |
| 6 | 5171276 | 5171279 | 0.003 |
| 6 | 5171282 | 5171346 | 0.064 |
| 6 | 5171366 | 5171401 | 0.035 |
| 6 | 5171478 | 5171484 | 0.006 |
| 6 | 5171632 | 5171639 | 0.007 |
| 6 | 5171657 | 5171666 | 0.009 |
| 6 | 5171725 | 5171794 | 0.069 |
| 6 | 5171803 | 5171818 | 0.015 |
| 6 | 5171820 | 5171846 | 0.026 |
| 6 | 5171858 | 5175952 | 4.094 |
| 6 | 5175971 | 5175979 | 0.008 |
| 6 | 5176005 | 5176009 | 0.004 |
| 6 | 5176025 | 5176035 | 0.01  |
| 6 | 5176128 | 5176153 | 0.025 |
| 6 | 5176164 | 5176167 | 0.003 |
| 6 | 5176200 | 5176209 | 0.009 |
| 6 | 5176216 | 5176227 | 0.011 |
| 6 | 5176235 | 5176254 | 0.019 |
| 6 | 5176288 | 5176388 | 0.1   |
| 6 | 5176434 | 5176472 | 0.038 |
| 6 | 5176701 | 5176734 | 0.033 |
| 6 | 5176738 | 5176768 | 0.03  |

|   |         |         |       |
|---|---------|---------|-------|
| 6 | 5176834 | 5176859 | 0.025 |
| 6 | 5177019 | 5177062 | 0.043 |
| 6 | 5177079 | 5177114 | 0.035 |
| 6 | 5177284 | 5177289 | 0.005 |
| 6 | 5177603 | 5177620 | 0.017 |
| 6 | 5177701 | 5177921 | 0.22  |
| 6 | 5177940 | 5178029 | 0.089 |
| 6 | 5178033 | 5178037 | 0.004 |
| 6 | 5178139 | 5178157 | 0.018 |
| 6 | 5178208 | 5178222 | 0.014 |
| 6 | 5178324 | 5178336 | 0.012 |
| 6 | 5178500 | 5178512 | 0.012 |
| 6 | 5178791 | 5178829 | 0.038 |
| 6 | 5178876 | 5178882 | 0.006 |
| 6 | 5178996 | 5179002 | 0.006 |
| 6 | 5179060 | 5179074 | 0.014 |
| 6 | 5179208 | 5179276 | 0.068 |
| 6 | 5179428 | 5179537 | 0.109 |
| 6 | 5179733 | 5179746 | 0.013 |
| 6 | 5179759 | 5179763 | 0.004 |
| 6 | 5179891 | 5179919 | 0.028 |
| 6 | 5179959 | 5179966 | 0.007 |
| 6 | 5180090 | 5180141 | 0.051 |
| 6 | 5180142 | 5180178 | 0.036 |
| 6 | 5180294 | 5180316 | 0.022 |
| 6 | 5180323 | 5180347 | 0.024 |
| 6 | 5180373 | 5180380 | 0.007 |
| 6 | 5180431 | 5180444 | 0.013 |
| 6 | 5180480 | 5180491 | 0.011 |
| 6 | 5180538 | 5180613 | 0.075 |
| 6 | 5180639 | 5180645 | 0.006 |
| 6 | 5180673 | 5180680 | 0.007 |
| 6 | 5180743 | 5180745 | 0.002 |
| 6 | 5180777 | 5180790 | 0.013 |
| 6 | 5180933 | 5180957 | 0.024 |
| 6 | 5181102 | 5181140 | 0.038 |
| 6 | 5181169 | 5181180 | 0.011 |
| 6 | 5181190 | 5181196 | 0.006 |
| 6 | 5181414 | 5183408 | 1.994 |
| 6 | 5183461 | 5183478 | 0.017 |
| 6 | 5183648 | 5183715 | 0.067 |
| 6 | 5183718 | 5183726 | 0.008 |
| 6 | 5183860 | 5183869 | 0.009 |
| 6 | 5183929 | 5183954 | 0.025 |
| 6 | 5183965 | 5183981 | 0.016 |
| 6 | 5184312 | 5184320 | 0.008 |
| 6 | 5184400 | 5184434 | 0.034 |
| 6 | 5184575 | 5184580 | 0.005 |
| 6 | 5184651 | 5184673 | 0.022 |
| 6 | 5184713 | 5184718 | 0.005 |
| 6 | 5184727 | 5184731 | 0.004 |
| 6 | 5184872 | 5184880 | 0.008 |
| 6 | 5185111 | 5185118 | 0.007 |
| 6 | 5185241 | 5185500 | 0.259 |
| 6 | 5185571 | 5185582 | 0.011 |
| 6 | 5185670 | 5185719 | 0.049 |
| 6 | 5185724 | 5185798 | 0.074 |
| 6 | 5185855 | 5185859 | 0.004 |
| 6 | 5185978 | 5185981 | 0.003 |
| 6 | 5186053 | 5186068 | 0.015 |
| 6 | 5186160 | 5186174 | 0.014 |

|   |         |         |       |
|---|---------|---------|-------|
| 6 | 5186599 | 5186603 | 0.004 |
| 6 | 5186613 | 5186657 | 0.044 |
| 6 | 5186955 | 5186985 | 0.03  |
| 6 | 5187014 | 5187019 | 0.005 |
| 6 | 5187028 | 5187038 | 0.01  |
| 6 | 5187083 | 5187126 | 0.043 |
| 6 | 5187212 | 5187218 | 0.006 |
| 6 | 5187522 | 5187526 | 0.004 |
| 6 | 5187586 | 5187590 | 0.004 |
| 6 | 5187610 | 5187660 | 0.05  |
| 6 | 5187720 | 5187726 | 0.006 |
| 6 | 5187747 | 5187752 | 0.005 |
| 6 | 5187937 | 5188101 | 0.164 |
| 6 | 5188108 | 5188123 | 0.015 |
| 6 | 5188170 | 5188185 | 0.015 |
| 6 | 5188455 | 5188467 | 0.012 |
| 6 | 5188500 | 5188507 | 0.007 |
| 6 | 5188553 | 5188563 | 0.01  |
| 6 | 5189229 | 5189253 | 0.024 |
| 6 | 5189379 | 5189386 | 0.007 |
| 6 | 5189394 | 5189402 | 0.008 |
| 6 | 5189434 | 5189450 | 0.016 |
| 6 | 5189575 | 5189578 | 0.003 |
| 6 | 5189631 | 5189634 | 0.003 |
| 6 | 5189650 | 5189660 | 0.01  |
| 6 | 5189762 | 5189829 | 0.067 |
| 6 | 5190045 | 5190048 | 0.003 |
| 6 | 5190094 | 5190129 | 0.035 |
| 6 | 5190133 | 5190136 | 0.003 |
| 6 | 5190138 | 5190181 | 0.043 |
| 6 | 5190303 | 5190316 | 0.013 |
| 6 | 5190465 | 5190491 | 0.026 |
| 6 | 5190550 | 5190642 | 0.092 |
| 6 | 5190643 | 5190647 | 0.004 |
| 6 | 5190772 | 5190834 | 0.062 |
| 6 | 5190930 | 5190936 | 0.006 |
| 6 | 5191238 | 5191240 | 0.002 |
| 6 | 5191243 | 5191258 | 0.015 |
| 6 | 5191266 | 5191279 | 0.013 |
| 6 | 5191375 | 5191415 | 0.04  |
| 6 | 5191521 | 5191525 | 0.004 |
| 6 | 5191526 | 5191536 | 0.01  |
| 6 | 5191541 | 5191549 | 0.008 |
| 6 | 5191690 | 5191783 | 0.093 |
| 6 | 5250545 | 5254042 | 3.497 |
| 6 | 5254050 | 5254057 | 0.007 |
| 6 | 5254119 | 5254126 | 0.007 |
| 6 | 5254330 | 5254349 | 0.019 |
| 6 | 5254403 | 5254412 | 0.009 |
| 6 | 5254432 | 5254518 | 0.086 |
| 6 | 5254591 | 5254626 | 0.035 |
| 6 | 5254711 | 5254785 | 0.074 |
| 6 | 5254911 | 5254920 | 0.009 |
| 6 | 5255016 | 5255022 | 0.006 |
| 6 | 5255038 | 5255046 | 0.008 |
| 6 | 5255081 | 5255120 | 0.039 |
| 6 | 5255355 | 5255396 | 0.041 |
| 6 | 5255629 | 5255633 | 0.004 |
| 6 | 5255799 | 5255813 | 0.014 |
| 6 | 5255816 | 5255866 | 0.05  |
| 6 | 5255899 | 5256000 | 0.101 |

|   |         |         |       |
|---|---------|---------|-------|
| 6 | 5256015 | 5256065 | 0.05  |
| 6 | 5256066 | 5256080 | 0.014 |
| 6 | 5256119 | 5256129 | 0.01  |
| 6 | 5256199 | 5256207 | 0.008 |
| 6 | 5256208 | 5256250 | 0.042 |
| 6 | 5256258 | 5256263 | 0.005 |
| 6 | 5256311 | 5256323 | 0.012 |
| 6 | 5256555 | 5256684 | 0.129 |
| 6 | 5256751 | 5256765 | 0.014 |
| 6 | 5256951 | 5257019 | 0.068 |
| 6 | 5257126 | 5257424 | 0.298 |
| 6 | 5257446 | 5257467 | 0.021 |
| 6 | 5257492 | 5257519 | 0.027 |
| 6 | 5257602 | 5257619 | 0.017 |
| 6 | 5257634 | 5257727 | 0.093 |
| 6 | 5257777 | 5257790 | 0.013 |
| 6 | 5257877 | 5257885 | 0.008 |
| 6 | 5257919 | 5258094 | 0.175 |
| 6 | 5258173 | 5258180 | 0.007 |
| 6 | 5258291 | 5258308 | 0.017 |
| 6 | 5258442 | 5258455 | 0.013 |
| 6 | 5258460 | 5258484 | 0.024 |
| 6 | 5258585 | 5258590 | 0.005 |
| 6 | 5258669 | 5258741 | 0.072 |
| 6 | 5258874 | 5258885 | 0.011 |
| 6 | 5258898 | 5258909 | 0.011 |
| 6 | 5258915 | 5258931 | 0.016 |
| 6 | 5259046 | 5259053 | 0.007 |
| 6 | 5259065 | 5259078 | 0.013 |
| 6 | 5259144 | 5259191 | 0.047 |
| 6 | 5259193 | 5259292 | 0.099 |
| 6 | 5259321 | 5259355 | 0.034 |
| 6 | 5259361 | 5259378 | 0.017 |
| 6 | 5259501 | 5259505 | 0.004 |
| 6 | 5259646 | 5259664 | 0.018 |
| 6 | 5259822 | 5259885 | 0.063 |
| 6 | 5259896 | 5259900 | 0.004 |
| 6 | 5260030 | 5260040 | 0.01  |
| 6 | 5260119 | 5260186 | 0.067 |
| 6 | 5260390 | 5260396 | 0.006 |
| 6 | 5260483 | 5260505 | 0.022 |
| 6 | 5260548 | 5260553 | 0.005 |
| 6 | 5260607 | 5260723 | 0.116 |
| 6 | 5260735 | 5260751 | 0.016 |
| 6 | 5260913 | 5261039 | 0.126 |
| 6 | 5261081 | 5261098 | 0.017 |
| 6 | 5261166 | 5261173 | 0.007 |
| 6 | 5261235 | 5261267 | 0.032 |
| 6 | 5261283 | 5261296 | 0.013 |
| 6 | 5261363 | 5261368 | 0.005 |
| 6 | 5261413 | 5261424 | 0.011 |
| 6 | 5261425 | 5261441 | 0.016 |
| 6 | 5261466 | 5261485 | 0.019 |
| 6 | 5261496 | 5261536 | 0.04  |
| 6 | 5261591 | 5261601 | 0.01  |
| 6 | 5261630 | 5261641 | 0.011 |
| 6 | 5261645 | 5261651 | 0.006 |
| 6 | 5261682 | 5261687 | 0.005 |
| 6 | 5261692 | 5261712 | 0.02  |
| 6 | 5261802 | 5261998 | 0.196 |
| 6 | 5262029 | 5262031 | 0.002 |

|   |         |         |       |
|---|---------|---------|-------|
| 6 | 5262032 | 5262046 | 0.014 |
| 6 | 5262050 | 5262135 | 0.085 |
| 6 | 5262175 | 5262237 | 0.062 |
| 6 | 5262399 | 5262441 | 0.042 |
| 6 | 5262470 | 5262496 | 0.026 |
| 6 | 5262849 | 5262886 | 0.037 |
| 6 | 5262940 | 5263012 | 0.072 |
| 6 | 5263014 | 5263021 | 0.007 |
| 6 | 5263024 | 5263222 | 0.198 |
| 6 | 5263479 | 5263494 | 0.015 |
| 6 | 5263517 | 5263536 | 0.019 |
| 6 | 5263727 | 5263734 | 0.007 |
| 6 | 5263756 | 5263778 | 0.022 |
| 6 | 5263796 | 5263807 | 0.011 |
| 6 | 5263846 | 5263863 | 0.017 |
| 6 | 5264013 | 5264017 | 0.004 |
| 6 | 5264039 | 5264048 | 0.009 |
| 6 | 5264106 | 5264115 | 0.009 |
| 6 | 5264162 | 5264225 | 0.063 |
| 6 | 5264485 | 5264502 | 0.017 |
| 6 | 5264571 | 5264578 | 0.007 |
| 6 | 5264758 | 5264771 | 0.013 |
| 6 | 5264919 | 5264989 | 0.07  |
| 6 | 5265044 | 5265078 | 0.034 |
| 6 | 5265079 | 5265179 | 0.1   |
| 6 | 5265289 | 5265296 | 0.007 |
| 6 | 5265548 | 5265553 | 0.005 |
| 6 | 5265703 | 5265785 | 0.082 |
| 6 | 5265884 | 5265886 | 0.002 |
| 6 | 5265892 | 5265924 | 0.032 |
| 6 | 5265992 | 5265996 | 0.004 |
| 6 | 5266034 | 5266412 | 0.378 |
| 6 | 5266428 | 5266431 | 0.003 |
| 6 | 5266451 | 5266459 | 0.008 |
| 6 | 5266467 | 5266475 | 0.008 |
| 6 | 5266522 | 5266543 | 0.021 |
| 6 | 5266591 | 5266605 | 0.014 |
| 6 | 5266610 | 5266701 | 0.091 |
| 6 | 5266753 | 5266760 | 0.007 |
| 6 | 5266762 | 5266770 | 0.008 |
| 6 | 5267090 | 5267107 | 0.017 |
| 6 | 5267293 | 5267352 | 0.059 |
| 6 | 5267430 | 5267434 | 0.004 |
| 6 | 5267765 | 5267769 | 0.004 |
| 6 | 5267847 | 5267854 | 0.007 |
| 6 | 5267877 | 5268103 | 0.226 |
| 6 | 5268113 | 5268209 | 0.096 |
| 6 | 5268219 | 5268296 | 0.077 |
| 6 | 5268404 | 5268542 | 0.138 |
| 6 | 5268598 | 5268611 | 0.013 |
| 6 | 5268703 | 5268756 | 0.053 |
| 6 | 5268890 | 5268907 | 0.017 |
| 6 | 5268923 | 5269036 | 0.113 |
| 6 | 5269082 | 5269138 | 0.056 |
| 6 | 5269173 | 5269202 | 0.029 |
| 6 | 5269217 | 5269291 | 0.074 |
| 6 | 5269310 | 5269322 | 0.012 |
| 6 | 5269416 | 5269419 | 0.003 |
| 6 | 5269494 | 5269513 | 0.019 |
| 6 | 5269570 | 5269574 | 0.004 |
| 6 | 5269582 | 5269586 | 0.004 |

|   |         |         |       |
|---|---------|---------|-------|
| 6 | 5269753 | 5269763 | 0.01  |
| 6 | 5269992 | 5270013 | 0.021 |
| 6 | 5270045 | 5270114 | 0.069 |
| 6 | 5270137 | 5270169 | 0.032 |
| 6 | 5270292 | 5270311 | 0.019 |
| 6 | 5270351 | 5270436 | 0.085 |
| 6 | 5270609 | 5270720 | 0.111 |
| 6 | 5270762 | 5270850 | 0.088 |
| 6 | 5270898 | 5270902 | 0.004 |
| 6 | 5270948 | 5271006 | 0.058 |
| 6 | 5271384 | 5271391 | 0.007 |
| 6 | 5271608 | 5271620 | 0.012 |
| 6 | 5271732 | 5271747 | 0.015 |
| 6 | 5271765 | 5271786 | 0.021 |
| 6 | 5271845 | 5271891 | 0.046 |
| 6 | 5271901 | 5271906 | 0.005 |
| 6 | 5272257 | 5272288 | 0.031 |
| 6 | 5272293 | 5272308 | 0.015 |
| 6 | 5272340 | 5272365 | 0.025 |
| 6 | 5272395 | 5272433 | 0.038 |
| 6 | 5272434 | 5272445 | 0.011 |
| 6 | 5272528 | 5272540 | 0.012 |
| 6 | 5272576 | 5272590 | 0.014 |
| 6 | 5272654 | 5272681 | 0.027 |
| 6 | 5272745 | 5272783 | 0.038 |
| 6 | 5272788 | 5272793 | 0.005 |
| 6 | 5272837 | 5272860 | 0.023 |
| 6 | 5272895 | 5272905 | 0.01  |
| 6 | 5272907 | 5272979 | 0.072 |
| 6 | 5272997 | 5273000 | 0.003 |
| 6 | 5273013 | 5273088 | 0.075 |
| 6 | 5273104 | 5273107 | 0.003 |
| 6 | 5273163 | 5273207 | 0.044 |
| 6 | 5273211 | 5273250 | 0.039 |
| 6 | 5273327 | 5273350 | 0.023 |
| 6 | 5273413 | 5273542 | 0.129 |
| 6 | 5273622 | 5273624 | 0.002 |
| 6 | 5273637 | 5273689 | 0.052 |
| 6 | 5273747 | 5273798 | 0.051 |
| 6 | 5273832 | 5273844 | 0.012 |
| 6 | 5273846 | 5273858 | 0.012 |
| 6 | 5274028 | 5274033 | 0.005 |
| 6 | 5274149 | 5274208 | 0.059 |
| 6 | 5274222 | 5274226 | 0.004 |
| 6 | 5274237 | 5274251 | 0.014 |
| 6 | 5274273 | 5274277 | 0.004 |
| 6 | 5274398 | 5274420 | 0.022 |
| 6 | 5274437 | 5274443 | 0.006 |
| 6 | 5274444 | 5274447 | 0.003 |
| 6 | 5274524 | 5274555 | 0.031 |
| 6 | 5275006 | 5275011 | 0.005 |
| 6 | 5275021 | 5275034 | 0.013 |
| 6 | 5275087 | 5275092 | 0.005 |
| 6 | 5275099 | 5275117 | 0.018 |
| 6 | 5275133 | 5275144 | 0.011 |
| 6 | 5275149 | 5275156 | 0.007 |
| 6 | 5275215 | 5275222 | 0.007 |
| 6 | 5275245 | 5275304 | 0.059 |
| 6 | 5275338 | 5275358 | 0.02  |
| 6 | 5275413 | 5275457 | 0.044 |
| 6 | 5275497 | 5275506 | 0.009 |



|   |         |         |       |
|---|---------|---------|-------|
| 6 | 5275510 | 5275524 | 0.014 |
| 6 | 5275607 | 5275638 | 0.031 |
| 6 | 5275948 | 5275996 | 0.048 |
| 6 | 5276066 | 5276090 | 0.024 |
| 6 | 5276197 | 5276206 | 0.009 |
| 6 | 5276271 | 5276294 | 0.023 |
| 6 | 5276447 | 5276458 | 0.011 |
| 6 | 5276588 | 5276599 | 0.011 |
| 6 | 5276693 | 5276721 | 0.028 |
| 6 | 5276789 | 5276806 | 0.017 |
| 6 | 5276826 | 5276869 | 0.043 |
| 6 | 5276968 | 5277002 | 0.034 |
| 6 | 5277053 | 5277056 | 0.003 |
| 6 | 5277073 | 5277077 | 0.004 |
| 6 | 5277082 | 5277092 | 0.01  |
| 6 | 5277100 | 5277109 | 0.009 |
| 6 | 5277174 | 5277177 | 0.003 |
| 6 | 5277216 | 5277238 | 0.022 |
| 6 | 5277243 | 5277261 | 0.018 |
| 6 | 5277280 | 5277290 | 0.01  |
| 6 | 5277309 | 5277336 | 0.027 |
| 6 | 5277443 | 5277459 | 0.016 |
| 6 | 5277506 | 5277516 | 0.01  |
| 6 | 5277546 | 5277580 | 0.034 |
| 6 | 5277597 | 5277601 | 0.004 |
| 6 | 5277627 | 5277662 | 0.035 |
| 6 | 5277668 | 5277677 | 0.009 |
| 6 | 5277779 | 5277786 | 0.007 |
| 6 | 5277806 | 5277857 | 0.051 |
| 6 | 5277870 | 5277893 | 0.023 |
| 6 | 5278030 | 5278036 | 0.006 |
| 6 | 5278076 | 5278082 | 0.006 |
| 6 | 5278089 | 5278101 | 0.012 |
| 6 | 5278176 | 5278182 | 0.006 |
| 6 | 5278282 | 5278296 | 0.014 |
| 6 | 5278323 | 5278330 | 0.007 |
| 6 | 5278339 | 5278354 | 0.015 |
| 6 | 5278373 | 5278384 | 0.011 |
| 6 | 5278525 | 5278533 | 0.008 |
| 6 | 5278550 | 5278583 | 0.033 |
| 6 | 5278758 | 5278769 | 0.011 |
| 6 | 5278775 | 5278840 | 0.065 |
| 6 | 5278859 | 5278905 | 0.046 |
| 6 | 5278924 | 5278939 | 0.015 |
| 6 | 5278969 | 5278978 | 0.009 |
| 6 | 5278994 | 5279019 | 0.025 |
| 6 | 5279027 | 5279037 | 0.01  |
| 6 | 5279040 | 5279053 | 0.013 |
| 6 | 5279089 | 5279098 | 0.009 |
| 6 | 5279112 | 5279123 | 0.011 |
| 6 | 5279497 | 5279502 | 0.005 |
| 6 | 5279601 | 5279612 | 0.011 |
| 6 | 5279731 | 5279786 | 0.055 |
| 6 | 5279821 | 5279943 | 0.122 |
| 6 | 5279966 | 5279968 | 0.002 |
| 6 | 5280017 | 5280094 | 0.077 |
| 6 | 5280162 | 5280167 | 0.005 |
| 6 | 5280168 | 5280172 | 0.004 |
| 6 | 5280237 | 5280306 | 0.069 |
| 6 | 5280363 | 5280410 | 0.047 |
| 6 | 5280423 | 5280464 | 0.041 |

|   |         |         |       |
|---|---------|---------|-------|
| 6 | 5280472 | 5280483 | 0.011 |
| 6 | 5280500 | 5280512 | 0.012 |
| 6 | 5280514 | 5280610 | 0.096 |
| 6 | 5280629 | 5280639 | 0.01  |
| 6 | 5280718 | 5280848 | 0.13  |
| 6 | 5280852 | 5280855 | 0.003 |
| 6 | 5280911 | 5280963 | 0.052 |
| 6 | 5281012 | 5281020 | 0.008 |
| 6 | 5281411 | 5281425 | 0.014 |
| 6 | 5281449 | 5281455 | 0.006 |
| 6 | 5281457 | 5281469 | 0.012 |
| 6 | 5281472 | 5281482 | 0.01  |
| 6 | 5281628 | 5281656 | 0.028 |
| 6 | 5281658 | 5281667 | 0.009 |
| 6 | 5281730 | 5281744 | 0.014 |
| 6 | 5281771 | 5281784 | 0.013 |
| 6 | 5282023 | 5282052 | 0.029 |
| 6 | 5282063 | 5282087 | 0.024 |
| 6 | 5282124 | 5282134 | 0.01  |
| 6 | 5282137 | 5282143 | 0.006 |
| 6 | 5282211 | 5282226 | 0.015 |
| 6 | 5282237 | 5282247 | 0.01  |
| 6 | 5282279 | 5282287 | 0.008 |
| 6 | 5282402 | 5291441 | 9.039 |
| 6 | 5291448 | 5291479 | 0.031 |
| 6 | 5291657 | 5291698 | 0.041 |
| 6 | 5291865 | 5291889 | 0.024 |
| 6 | 5291924 | 5291933 | 0.009 |
| 6 | 5292136 | 5292236 | 0.1   |
| 6 | 5292265 | 5292360 | 0.095 |
| 6 | 5292417 | 5292434 | 0.017 |
| 6 | 5292565 | 5292579 | 0.014 |
| 6 | 5292713 | 5292734 | 0.021 |
| 6 | 5292766 | 5292787 | 0.021 |
| 6 | 5292982 | 5293039 | 0.057 |
| 6 | 5293125 | 5293130 | 0.005 |
| 6 | 5293164 | 5293168 | 0.004 |
| 6 | 5293175 | 5293188 | 0.013 |
| 6 | 5293224 | 5293227 | 0.003 |
| 6 | 5293388 | 5293440 | 0.052 |
| 6 | 5293444 | 5293460 | 0.016 |
| 6 | 5293461 | 5293477 | 0.016 |
| 6 | 5293548 | 5293554 | 0.006 |
| 6 | 5293570 | 5293578 | 0.008 |
| 6 | 5293662 | 5293665 | 0.003 |
| 6 | 5293703 | 5293724 | 0.021 |
| 6 | 5293752 | 5293762 | 0.01  |
| 6 | 5293766 | 5293776 | 0.01  |
| 6 | 5293878 | 5293886 | 0.008 |
| 6 | 5293989 | 5293997 | 0.008 |
| 6 | 5294099 | 5294110 | 0.011 |
| 6 | 5294212 | 5294227 | 0.015 |
| 6 | 5294244 | 5294250 | 0.006 |
| 6 | 5294535 | 5294547 | 0.012 |
| 6 | 5294687 | 5294707 | 0.02  |
| 6 | 5294721 | 5294728 | 0.007 |
| 6 | 5294750 | 5294770 | 0.02  |
| 6 | 5294807 | 5294816 | 0.009 |
| 6 | 5294819 | 5294893 | 0.074 |
| 6 | 5295192 | 5295202 | 0.01  |
| 6 | 5295204 | 5295537 | 0.333 |

|   |         |         |       |
|---|---------|---------|-------|
| 6 | 5295687 | 5295698 | 0.011 |
| 6 | 5295715 | 5295750 | 0.035 |
| 6 | 5295751 | 5295773 | 0.022 |
| 6 | 5295798 | 5295826 | 0.028 |
| 6 | 5296087 | 5296140 | 0.053 |
| 6 | 5296168 | 5296210 | 0.042 |
| 6 | 5296221 | 5296236 | 0.015 |
| 6 | 5296423 | 5296430 | 0.007 |
| 6 | 5296517 | 5296519 | 0.002 |
| 6 | 5296531 | 5296540 | 0.009 |
| 6 | 5296548 | 5296552 | 0.004 |
| 6 | 5296656 | 5296663 | 0.007 |
| 6 | 5296668 | 5296929 | 0.261 |
| 6 | 5297053 | 5297119 | 0.066 |
| 6 | 5297122 | 5297157 | 0.035 |
| 6 | 5297202 | 5297259 | 0.057 |
| 6 | 5297262 | 5297280 | 0.018 |
| 6 | 5297291 | 5297295 | 0.004 |
| 6 | 5297297 | 5297504 | 0.207 |
| 6 | 5297507 | 5297518 | 0.011 |
| 6 | 5297659 | 5297688 | 0.029 |
| 6 | 5297722 | 5297735 | 0.013 |
| 6 | 5297759 | 5297770 | 0.011 |
| 6 | 5297855 | 5297917 | 0.062 |
| 6 | 5297943 | 5297960 | 0.017 |
| 6 | 5298042 | 5298111 | 0.069 |
| 6 | 5298126 | 5298135 | 0.009 |
| 6 | 5298260 | 5298267 | 0.007 |
| 6 | 5298274 | 5298280 | 0.006 |
| 6 | 5298291 | 5298318 | 0.027 |
| 6 | 5298479 | 5298493 | 0.014 |
| 6 | 5298525 | 5298533 | 0.008 |
| 6 | 5298846 | 5298929 | 0.083 |
| 6 | 5298965 | 5298970 | 0.005 |
| 6 | 5298982 | 5299009 | 0.027 |
| 6 | 5299012 | 5299023 | 0.011 |
| 6 | 5299044 | 5299049 | 0.005 |
| 6 | 5299175 | 5299199 | 0.024 |
| 6 | 5299203 | 5299229 | 0.026 |
| 6 | 5299248 | 5299262 | 0.014 |
| 6 | 5299625 | 5299641 | 0.016 |
| 6 | 5299718 | 5299720 | 0.002 |
| 6 | 5299817 | 5299826 | 0.009 |
| 6 | 5299867 | 5299881 | 0.014 |
| 6 | 5299953 | 5299975 | 0.022 |
| 6 | 5300084 | 5300122 | 0.038 |
| 6 | 5300181 | 5300209 | 0.028 |
| 6 | 5300221 | 5300265 | 0.044 |
| 6 | 5300444 | 5300565 | 0.121 |
| 6 | 5300677 | 5300693 | 0.016 |
| 6 | 5300704 | 5300710 | 0.006 |
| 6 | 5300766 | 5300771 | 0.005 |
| 6 | 5300810 | 5300823 | 0.013 |
| 6 | 5300962 | 5301058 | 0.096 |
| 6 | 5301083 | 5301088 | 0.005 |
| 6 | 5301235 | 5301276 | 0.041 |
| 6 | 5306175 | 5306354 | 0.179 |
| 6 | 5306745 | 5306788 | 0.043 |
| 6 | 5306803 | 5306813 | 0.01  |
| 6 | 5306814 | 5306875 | 0.061 |
| 6 | 5306882 | 5306950 | 0.068 |

|   |         |         |       |
|---|---------|---------|-------|
| 6 | 5306958 | 5306963 | 0.005 |
| 6 | 5307073 | 5307088 | 0.015 |
| 6 | 5307147 | 5307151 | 0.004 |
| 6 | 5307152 | 5307234 | 0.082 |
| 6 | 5307263 | 5307273 | 0.01  |
| 6 | 5307400 | 5307424 | 0.024 |
| 6 | 5307544 | 5307568 | 0.024 |
| 6 | 5307843 | 5307879 | 0.036 |
| 6 | 5307890 | 5307899 | 0.009 |
| 6 | 5308025 | 5308047 | 0.022 |
| 6 | 5308058 | 5308086 | 0.028 |
| 6 | 5308113 | 5308120 | 0.007 |
| 6 | 5308125 | 5308219 | 0.094 |
| 6 | 5308230 | 5308302 | 0.072 |
| 6 | 5308351 | 5308368 | 0.017 |
| 6 | 5308378 | 5308435 | 0.057 |
| 6 | 5308469 | 5308526 | 0.057 |
| 6 | 5308538 | 5308686 | 0.148 |
| 6 | 5308734 | 5308790 | 0.056 |
| 6 | 5313442 | 5321062 | 7.62  |
| 6 | 5321302 | 5321308 | 0.006 |
| 6 | 5321318 | 5321326 | 0.008 |
| 6 | 5321361 | 5321367 | 0.006 |
| 6 | 5321579 | 5321684 | 0.105 |
| 6 | 5321696 | 5321710 | 0.014 |
| 6 | 5321711 | 5321753 | 0.042 |
| 6 | 5321769 | 5321919 | 0.15  |
| 6 | 5321941 | 5322213 | 0.272 |
| 6 | 5322218 | 5322363 | 0.145 |
| 6 | 5322364 | 5322369 | 0.005 |
| 6 | 5322480 | 5322482 | 0.002 |
| 6 | 5322500 | 5322779 | 0.279 |
| 6 | 5322858 | 5322866 | 0.008 |
| 6 | 5323013 | 5323030 | 0.017 |
| 6 | 5323165 | 5323179 | 0.014 |
| 6 | 5323210 | 5323271 | 0.061 |
| 6 | 5323281 | 5323291 | 0.01  |
| 6 | 5323464 | 5323479 | 0.015 |
| 6 | 5323526 | 5323551 | 0.025 |
| 6 | 5323565 | 5323594 | 0.029 |
| 6 | 5323612 | 5323624 | 0.012 |
| 6 | 5323706 | 5323723 | 0.017 |
| 6 | 5323739 | 5323772 | 0.033 |
| 6 | 5323782 | 5323790 | 0.008 |
| 6 | 5323930 | 5323937 | 0.007 |
| 6 | 5333247 | 5338698 | 5.451 |
| 6 | 5348707 | 5348733 | 0.026 |
| 6 | 5348811 | 5348868 | 0.057 |
| 6 | 5348970 | 5348975 | 0.005 |
| 6 | 5349053 | 5349147 | 0.094 |
| 6 | 5349188 | 5349195 | 0.007 |
| 6 | 5349203 | 5349211 | 0.008 |
| 6 | 5349427 | 5349509 | 0.082 |
| 6 | 5349658 | 5349686 | 0.028 |
| 6 | 5349699 | 5349710 | 0.011 |
| 6 | 5349719 | 5349805 | 0.086 |
| 6 | 5349886 | 5349895 | 0.009 |
| 6 | 5350070 | 5350202 | 0.132 |
| 6 | 5350410 | 5350502 | 0.092 |
| 6 | 5350545 | 5350554 | 0.009 |
| 6 | 5350579 | 5350582 | 0.003 |

|   |          |          |         |
|---|----------|----------|---------|
| 6 | 5350782  | 5350793  | 0.011   |
| 6 | 5350808  | 5350864  | 0.056   |
| 6 | 5350952  | 5350966  | 0.014   |
| 6 | 5351011  | 5351028  | 0.017   |
| 6 | 5351040  | 5351046  | 0.006   |
| 6 | 5351110  | 5351116  | 0.006   |
| 6 | 5351362  | 5351369  | 0.007   |
| 6 | 5379070  | 5388656  | 9.586   |
| 6 | 5498449  | 5615048  | 116.599 |
| 6 | 5707748  | 5714919  | 7.171   |
| 6 | 5731291  | 5778789  | 47.498  |
| 6 | 5779403  | 5796190  | 16.787  |
| 6 | 5826343  | 5864599  | 38.256  |
| 6 | 5886057  | 5895360  | 9.303   |
| 6 | 5897412  | 5982503  | 85.091  |
| 6 | 6008393  | 6021340  | 12.947  |
| 6 | 6042725  | 6044032  | 1.307   |
| 6 | 6044128  | 6058239  | 14.111  |
| 6 | 6160447  | 6168990  | 8.543   |
| 6 | 6218317  | 6283293  | 64.976  |
| 6 | 6308445  | 6372057  | 63.612  |
| 6 | 6447185  | 6560996  | 113.811 |
| 6 | 6561181  | 6635998  | 74.817  |
| 6 | 6650044  | 6675292  | 25.248  |
| 6 | 6684460  | 6817831  | 133.371 |
| 6 | 6954597  | 7068397  | 113.8   |
| 6 | 7193387  | 7403813  | 210.426 |
| 6 | 7429224  | 7452946  | 23.722  |
| 6 | 7480899  | 7648268  | 167.369 |
| 6 | 7674357  | 7714932  | 40.575  |
| 6 | 7807689  | 8805751  | 998.062 |
| 6 | 8833137  | 8833327  | 0.19    |
| 6 | 8834938  | 8897334  | 62.396  |
| 6 | 9057305  | 9088470  | 31.165  |
| 6 | 9192554  | 9302827  | 110.273 |
| 6 | 9564845  | 9565071  | 0.226   |
| 6 | 9566005  | 9578862  | 12.857  |
| 6 | 9590092  | 9590097  | 0.005   |
| 6 | 9592222  | 9597848  | 5.626   |
| 6 | 9627217  | 9627249  | 0.032   |
| 6 | 9637453  | 9637488  | 0.035   |
| 6 | 9642648  | 10013034 | 370.386 |
| 6 | 10061260 | 10106720 | 45.46   |
| 6 | 10131428 | 10173015 | 41.587  |
| 6 | 10180152 | 10232746 | 52.594  |
| 6 | 10330497 | 10568568 | 238.071 |
| 6 | 10568575 | 10754146 | 185.571 |
| 6 | 11354025 | 11361131 | 7.106   |
| 6 | 11407986 | 11414126 | 6.14    |
| 6 | 11428439 | 11433360 | 4.921   |
| 6 | 11455177 | 11482449 | 27.272  |
| 6 | 11491752 | 11519510 | 27.758  |
| 6 | 11558592 | 11699949 | 141.357 |
| 6 | 11907164 | 11957879 | 50.715  |
| 6 | 12119838 | 12128736 | 8.898   |
| 6 | 12166925 | 12167105 | 0.18    |
| 6 | 12400608 | 12465688 | 65.08   |
| 6 | 12465823 | 12465836 | 0.013   |
| 6 | 12465854 | 12591704 | 125.85  |
| 6 | 12607434 | 12708344 | 100.91  |
| 6 | 12708395 | 12715858 | 7.463   |

|   |          |          |          |
|---|----------|----------|----------|
| 6 | 12767892 | 12831609 | 63.717   |
| 6 | 12879256 | 13050225 | 170.969  |
| 6 | 13067660 | 13085495 | 17.835   |
| 6 | 13098159 | 13098439 | 0.28     |
| 6 | 13212219 | 13282679 | 70.46    |
| 6 | 13315405 | 13316622 | 1.217    |
| 6 | 13322566 | 13334090 | 11.524   |
| 6 | 13340625 | 13352199 | 11.574   |
| 6 | 13404063 | 13732215 | 328.152  |
| 6 | 13784930 | 13826725 | 41.795   |
| 6 | 13828075 | 13989562 | 161.487  |
| 6 | 14050974 | 14121645 | 70.671   |
| 6 | 14150102 | 14196157 | 46.055   |
| 6 | 14213252 | 14255105 | 41.853   |
| 6 | 14297024 | 14421601 | 124.577  |
| 6 | 14451241 | 14485660 | 34.419   |
| 6 | 14542499 | 14558864 | 16.365   |
| 6 | 14566272 | 14566293 | 0.021    |
| 6 | 14566306 | 16133678 | 1567.372 |
| 6 | 16147333 | 16769037 | 621.704  |
| 6 | 17772706 | 18662553 | 889.847  |
| 6 | 18727341 | 18727402 | 0.061    |
| 6 | 18810745 | 18974644 | 163.899  |
| 6 | 18974684 | 19173468 | 198.784  |
| 6 | 19173475 | 19334603 | 161.128  |
| 6 | 19345488 | 19345703 | 0.215    |
| 6 | 19443344 | 19652838 | 209.494  |
| 6 | 19657150 | 19657241 | 0.091    |
| 6 | 19681667 | 19681692 | 0.025    |
| 6 | 19718227 | 19801049 | 82.822   |
| 6 | 19805045 | 19807402 | 2.357    |
| 6 | 19827155 | 19833772 | 6.617    |
| 6 | 19835674 | 19839209 | 3.535    |
| 6 | 19865992 | 19867255 | 1.263    |
| 6 | 19919766 | 19936163 | 16.397   |
| 6 | 19957654 | 19965530 | 7.876    |
| 6 | 19967873 | 19969905 | 2.032    |
| 6 | 20031157 | 20031351 | 0.194    |
| 6 | 20049440 | 20049475 | 0.035    |
| 6 | 20062515 | 20137631 | 75.116   |
| 6 | 20137636 | 20150738 | 13.102   |
| 6 | 20161785 | 20214029 | 52.244   |
| 6 | 20224982 | 20275516 | 50.534   |
| 6 | 20384154 | 20384168 | 0.014    |
| 6 | 20458373 | 20540033 | 81.66    |
| 6 | 20591637 | 20596176 | 4.539    |
| 6 | 20604930 | 20610563 | 5.633    |
| 6 | 20610603 | 20640888 | 30.285   |
| 6 | 20644741 | 20644746 | 0.005    |
| 6 | 20651732 | 20662199 | 10.467   |
| 6 | 20662345 | 20663545 | 1.2      |
| 6 | 20663579 | 20671687 | 8.108    |
| 6 | 20720615 | 20744353 | 23.738   |
| 6 | 20749561 | 20860757 | 111.196  |
| 6 | 20876636 | 20879677 | 3.041    |
| 6 | 20906703 | 21189391 | 282.688  |
| 6 | 21193352 | 21318628 | 125.276  |
| 6 | 21329433 | 21358561 | 29.128   |
| 6 | 21360210 | 21360230 | 0.02     |
| 6 | 21376114 | 21520215 | 144.101  |
| 6 | 21543151 | 21924937 | 381.786  |

|   |          |          |         |
|---|----------|----------|---------|
| 6 | 21981287 | 21981336 | 0.049   |
| 6 | 22156806 | 22178575 | 21.769  |
| 6 | 22298083 | 22428932 | 130.849 |
| 6 | 22433681 | 22490945 | 57.264  |
| 6 | 22611104 | 22613678 | 2.574   |
| 6 | 22637032 | 23027677 | 390.645 |
| 6 | 23102953 | 23109244 | 6.291   |
| 6 | 23177930 | 23304860 | 126.93  |
| 6 | 23304895 | 23419820 | 114.925 |
| 6 | 23438667 | 23460325 | 21.658  |
| 6 | 23584019 | 23801712 | 217.693 |
| 6 | 23852504 | 23939201 | 86.697  |
| 6 | 23962355 | 23977849 | 15.494  |
| 6 | 24006509 | 24048363 | 41.854  |
| 6 | 24098218 | 24130961 | 32.743  |
| 6 | 24153812 | 24212608 | 58.796  |
| 6 | 24215319 | 24318481 | 103.162 |
| 6 | 24324046 | 24556064 | 232.018 |
| 6 | 24563976 | 24660629 | 96.653  |
| 6 | 24734539 | 25348278 | 613.739 |
| 6 | 25359691 | 25404009 | 44.318  |
| 6 | 25501677 | 25591366 | 89.689  |
| 6 | 25591369 | 25923171 | 331.802 |
| 6 | 25958223 | 25958230 | 0.007   |
| 6 | 25958345 | 25958978 | 0.633   |
| 6 | 25995275 | 26040156 | 44.881  |
| 6 | 26043415 | 26043471 | 0.056   |
| 6 | 26056301 | 26064676 | 8.375   |
| 6 | 26067603 | 26067614 | 0.011   |
| 6 | 26068317 | 26069086 | 0.769   |
| 6 | 26073265 | 26073274 | 0.009   |
| 6 | 26073277 | 26105221 | 31.944  |
| 6 | 26105260 | 26105271 | 0.011   |
| 6 | 26106584 | 26107509 | 0.925   |
| 6 | 26108001 | 26108050 | 0.049   |
| 6 | 26108978 | 26108994 | 0.016   |
| 6 | 26108997 | 26117392 | 8.395   |
| 6 | 26117398 | 26149767 | 32.369  |
| 6 | 26153578 | 26154749 | 1.171   |
| 6 | 26154756 | 26155062 | 0.306   |
| 6 | 26155069 | 26155077 | 0.008   |
| 6 | 26155514 | 26155818 | 0.304   |
| 6 | 26155824 | 26156062 | 0.238   |
| 6 | 26156719 | 26156740 | 0.021   |
| 6 | 26156785 | 26156792 | 0.007   |
| 6 | 26183970 | 26396703 | 212.733 |
| 6 | 26467913 | 26618646 | 150.733 |
| 6 | 26659694 | 26659703 | 0.009   |
| 6 | 26660599 | 26727101 | 66.502  |
| 6 | 26761924 | 26968368 | 206.444 |
| 6 | 27025020 | 27091857 | 66.837  |
| 6 | 27123113 | 27289419 | 166.306 |
| 6 | 27295743 | 27341139 | 45.396  |
| 6 | 27366082 | 27402090 | 36.008  |
| 6 | 27409510 | 27409518 | 0.008   |
| 6 | 27431164 | 27536153 | 104.989 |
| 6 | 27571706 | 27598082 | 26.376  |
| 6 | 27637057 | 27657779 | 20.722  |
| 6 | 27720785 | 27758393 | 37.608  |
| 6 | 27768872 | 27870716 | 101.844 |
| 6 | 27942959 | 28012632 | 69.673  |

|   |          |          |          |
|---|----------|----------|----------|
| 6 | 28012639 | 28012672 | 0.033    |
| 6 | 28012814 | 28032204 | 19.39    |
| 6 | 28069701 | 28453704 | 384.003  |
| 6 | 28480856 | 28671852 | 190.996  |
| 6 | 28683092 | 28689013 | 5.921    |
| 6 | 28706889 | 28718377 | 11.488   |
| 6 | 28767994 | 28786072 | 18.078   |
| 6 | 28804884 | 28911626 | 106.742  |
| 6 | 28915918 | 28915927 | 0.009    |
| 6 | 28932544 | 28936166 | 3.622    |
| 6 | 28943855 | 29252979 | 309.124  |
| 6 | 29252985 | 29726995 | 474.01   |
| 6 | 29763018 | 29764415 | 1.397    |
| 6 | 29791744 | 29802378 | 10.634   |
| 6 | 29836868 | 30006599 | 169.731  |
| 6 | 30008278 | 30026398 | 18.12    |
| 6 | 30051455 | 30253916 | 202.461  |
| 6 | 30297052 | 30367241 | 70.189   |
| 6 | 30435006 | 31059420 | 624.414  |
| 6 | 31124186 | 32218442 | 1094.256 |
| 6 | 32365203 | 32414724 | 49.521   |
| 6 | 32430543 | 32462606 | 32.063   |
| 6 | 32494900 | 32754781 | 259.881  |
| 6 | 32757768 | 32820552 | 62.784   |
| 6 | 32829108 | 32829371 | 0.263    |
| 6 | 32868538 | 32868781 | 0.243    |
| 6 | 32886554 | 32886602 | 0.048    |
| 6 | 32920620 | 33148562 | 227.942  |
| 6 | 33151237 | 33165233 | 13.996   |
| 6 | 33165274 | 33165772 | 0.498    |
| 6 | 33168417 | 33168438 | 0.021    |
| 6 | 33174604 | 33198374 | 23.77    |
| 6 | 33198397 | 33216675 | 18.278   |
| 6 | 33332287 | 33369530 | 37.243   |
| 6 | 33406892 | 33407434 | 0.542    |
| 6 | 33452547 | 33555652 | 103.105  |
| 6 | 33574318 | 33666633 | 92.315   |
| 6 | 33696869 | 33714408 | 17.539   |
| 6 | 33725284 | 33752281 | 26.997   |
| 6 | 33783969 | 33867510 | 83.541   |
| 6 | 33874558 | 33908241 | 33.683   |
| 6 | 33943524 | 34046562 | 103.038  |
| 6 | 34096138 | 34381483 | 285.345  |
| 6 | 34428215 | 34472955 | 44.74    |
| 6 | 34569972 | 34618094 | 48.122   |
| 6 | 34620616 | 34648277 | 27.661   |
| 6 | 34727763 | 34730384 | 2.621    |
| 6 | 34749086 | 34771151 | 22.065   |
| 6 | 34955513 | 35088255 | 132.742  |
| 6 | 35130159 | 35147353 | 17.194   |
| 6 | 35175130 | 35610996 | 435.866  |
| 6 | 35617714 | 35736181 | 118.467  |
| 6 | 35747019 | 35768378 | 21.359   |
| 6 | 35780826 | 35840966 | 60.14    |
| 6 | 35877878 | 35909250 | 31.372   |
| 6 | 35921686 | 35941252 | 19.566   |
| 6 | 35955631 | 35982315 | 26.684   |
| 6 | 35989292 | 36075065 | 85.773   |
| 6 | 36158555 | 36222046 | 63.491   |
| 6 | 36238761 | 36566312 | 327.551  |
| 6 | 36597969 | 36625659 | 27.69    |



|   |          |          |         |
|---|----------|----------|---------|
| 6 | 36642142 | 36886643 | 244.501 |
| 6 | 37070426 | 37194807 | 124.381 |
| 6 | 37204420 | 37355519 | 151.099 |
| 6 | 37656125 | 37675439 | 19.314  |
| 6 | 37712730 | 37735605 | 22.875  |
| 6 | 37803434 | 38037480 | 234.046 |
| 6 | 38418147 | 38452264 | 34.117  |
| 6 | 38460312 | 38496214 | 35.902  |
| 6 | 38560991 | 38656708 | 95.717  |
| 6 | 38679845 | 38691093 | 11.248  |
| 6 | 38768263 | 38883319 | 115.056 |
| 6 | 38912249 | 38958211 | 45.962  |
| 6 | 39012657 | 39093143 | 80.486  |
| 6 | 39106852 | 39149382 | 42.53   |
| 6 | 39156608 | 39372886 | 216.278 |
| 6 | 39381370 | 39564118 | 182.748 |
| 6 | 39641287 | 39661443 | 20.156  |
| 6 | 39665198 | 39816514 | 151.316 |
| 6 | 39831589 | 39838577 | 6.988   |
| 6 | 39848436 | 39848933 | 0.497   |
| 6 | 39851439 | 39890893 | 39.454  |
| 6 | 39911670 | 39911675 | 0.005   |
| 6 | 39914808 | 39914970 | 0.162   |
| 6 | 39966400 | 39966416 | 0.016   |
| 6 | 39966436 | 39995470 | 29.034  |
| 6 | 39995615 | 39995673 | 0.058   |
| 6 | 40053377 | 40062880 | 9.503   |
| 6 | 40072981 | 40470139 | 397.158 |
| 6 | 40510659 | 40572366 | 61.707  |
| 6 | 40572569 | 40648535 | 75.966  |
| 6 | 40692893 | 40755496 | 62.603  |
| 6 | 40788537 | 40969169 | 180.632 |
| 6 | 40974941 | 40979904 | 4.963   |
| 6 | 40987841 | 40988637 | 0.796   |
| 6 | 41003809 | 41003825 | 0.016   |
| 6 | 41006109 | 41033132 | 27.023  |
| 6 | 41033742 | 41033755 | 0.013   |
| 6 | 41239283 | 41319536 | 80.253  |
| 6 | 41346310 | 41395522 | 49.212  |
| 6 | 41395524 | 41410070 | 14.546  |
| 6 | 41468102 | 41496342 | 28.24   |
| 6 | 41507603 | 41520623 | 13.02   |
| 6 | 41556165 | 41562891 | 6.726   |
| 6 | 41564696 | 41648850 | 84.154  |
| 6 | 41662139 | 41767930 | 105.791 |
| 6 | 42053066 | 42267437 | 214.371 |
| 6 | 42297850 | 42470343 | 172.493 |
| 6 | 42517125 | 42712067 | 194.942 |
| 6 | 42771335 | 42781499 | 10.164  |
| 6 | 42790256 | 42790273 | 0.017   |
| 6 | 42820901 | 42849684 | 28.783  |
| 6 | 42896192 | 42911046 | 14.854  |
| 6 | 42950790 | 42967694 | 16.904  |
| 6 | 42969363 | 42988303 | 18.94   |
| 6 | 43002805 | 43027097 | 24.292  |
| 6 | 43098592 | 43107801 | 9.209   |
| 6 | 43130068 | 43146112 | 16.044  |
| 6 | 43183409 | 43195431 | 12.022  |
| 6 | 43228513 | 43237995 | 9.482   |
| 6 | 43267563 | 43270767 | 3.204   |
| 6 | 43389921 | 43502500 | 112.579 |

|   |          |          |         |
|---|----------|----------|---------|
| 6 | 43537509 | 43541405 | 3.896   |
| 6 | 43587612 | 43632757 | 45.145  |
| 6 | 43636907 | 43637121 | 0.214   |
| 6 | 43637197 | 43654793 | 17.596  |
| 6 | 43656247 | 43666392 | 10.145  |
| 6 | 43675520 | 43709236 | 33.716  |
| 6 | 43719388 | 43757067 | 37.679  |
| 6 | 43877153 | 44006159 | 129.006 |
| 6 | 44006228 | 44041549 | 35.321  |
| 6 | 44195586 | 44197280 | 1.694   |
| 6 | 44209346 | 44334803 | 125.457 |
| 6 | 44336320 | 44355151 | 18.831  |
| 6 | 44380325 | 44391677 | 11.352  |
| 6 | 44419715 | 44771562 | 351.847 |
| 6 | 44867014 | 44918513 | 51.499  |
| 6 | 44956775 | 44967804 | 11.029  |
| 6 | 44969476 | 44983732 | 14.256  |
| 6 | 44990499 | 44990706 | 0.207   |
| 6 | 45026445 | 45032300 | 5.855   |
| 6 | 45033532 | 45048812 | 15.28   |
| 6 | 45100136 | 45129956 | 29.82   |
| 6 | 45132311 | 45240779 | 108.468 |
| 6 | 45321775 | 45408465 | 86.69   |
| 6 | 45413685 | 45459172 | 45.487  |
| 6 | 45462604 | 45542529 | 79.925  |
| 6 | 45606432 | 45701664 | 95.232  |
| 6 | 45716620 | 45748103 | 31.483  |
| 6 | 45751882 | 45826566 | 74.684  |
| 6 | 45853412 | 45854528 | 1.116   |
| 6 | 45905132 | 45927805 | 22.673  |
| 6 | 45948721 | 45994099 | 45.378  |
| 6 | 46006219 | 46026820 | 20.601  |
| 6 | 46109113 | 46327614 | 218.501 |
| 6 | 46414518 | 46431077 | 16.559  |
| 6 | 46434411 | 46473401 | 38.99   |
| 6 | 46566738 | 46651673 | 84.935  |
| 6 | 46692055 | 46694861 | 2.806   |
| 6 | 46694894 | 47008105 | 313.211 |
| 6 | 47052560 | 47112566 | 60.006  |
| 6 | 47119704 | 47136731 | 17.027  |
| 6 | 47148646 | 47481779 | 333.133 |
| 6 | 47497059 | 47681421 | 184.362 |
| 6 | 47687568 | 47711642 | 24.074  |
| 6 | 47725296 | 47816932 | 91.636  |
| 6 | 47817063 | 47847729 | 30.666  |
| 6 | 47882935 | 47916507 | 33.572  |
| 6 | 47949618 | 47968361 | 18.743  |
| 6 | 48003632 | 48098131 | 94.499  |
| 6 | 48313410 | 48473077 | 159.667 |
| 6 | 48519117 | 48524341 | 5.224   |
| 6 | 48537819 | 48614452 | 76.633  |
| 6 | 48616803 | 48626905 | 10.102  |
| 6 | 48671227 | 48680019 | 8.792   |
| 6 | 48721351 | 48752844 | 31.493  |
| 6 | 48786281 | 48827942 | 41.661  |
| 6 | 48923891 | 49018410 | 94.519  |
| 6 | 49033852 | 49085895 | 52.043  |
| 6 | 49102208 | 49662419 | 560.211 |
| 6 | 49758460 | 49780190 | 21.73   |
| 6 | 49784674 | 49904545 | 119.871 |
| 6 | 50146503 | 50172929 | 26.426  |

|   |          |          |         |
|---|----------|----------|---------|
| 6 | 50276432 | 50352388 | 75.956  |
| 6 | 50572896 | 50664846 | 91.95   |
| 6 | 50680028 | 50777727 | 97.699  |
| 6 | 50821656 | 50821770 | 0.114   |
| 6 | 50840628 | 50876325 | 35.697  |
| 6 | 50892584 | 51004439 | 111.855 |
| 6 | 51087097 | 51157253 | 70.156  |
| 6 | 51206374 | 51208501 | 2.127   |
| 6 | 51244171 | 51293722 | 49.551  |
| 6 | 51476156 | 51494311 | 18.155  |
| 6 | 51506776 | 51592043 | 85.267  |
| 6 | 51604050 | 51663852 | 59.802  |
| 6 | 51686911 | 51700041 | 13.13   |
| 6 | 51700048 | 52027022 | 326.974 |
| 6 | 52062227 | 52081190 | 18.963  |
| 6 | 52090555 | 52094749 | 4.194   |
| 6 | 52126614 | 52130546 | 3.932   |
| 6 | 52152306 | 52162235 | 9.929   |
| 6 | 52171995 | 52235462 | 63.467  |
| 6 | 52252861 | 52326418 | 73.557  |
| 6 | 52357355 | 52372371 | 15.016  |
| 6 | 52389356 | 52454120 | 64.764  |
| 6 | 52473102 | 52476944 | 3.842   |
| 6 | 52493319 | 52493335 | 0.016   |
| 6 | 52499154 | 52525759 | 26.605  |
| 6 | 52545259 | 52570843 | 25.584  |
| 6 | 52570852 | 52674632 | 103.78  |
| 6 | 52750655 | 52752682 | 2.027   |
| 6 | 52803364 | 52861527 | 58.163  |
| 6 | 52914792 | 52914887 | 0.095   |
| 6 | 52916066 | 52952794 | 36.728  |
| 6 | 52959782 | 53116321 | 156.539 |
| 6 | 53116342 | 53147994 | 31.652  |
| 6 | 53240814 | 53252828 | 12.014  |
| 6 | 53266151 | 53267585 | 1.434   |
| 6 | 53277683 | 53310940 | 33.257  |
| 6 | 53323979 | 53991966 | 667.987 |
| 6 | 53996236 | 54004991 | 8.755   |
| 6 | 54008296 | 54066680 | 58.384  |
| 6 | 54070898 | 54088666 | 17.768  |
| 6 | 54097720 | 54225891 | 128.171 |
| 6 | 54248901 | 54782162 | 533.261 |
| 6 | 54782244 | 54960285 | 178.041 |
| 6 | 55008949 | 55042571 | 33.622  |
| 6 | 55163585 | 55195641 | 32.056  |
| 6 | 55206642 | 55249128 | 42.486  |
| 6 | 55249213 | 55381303 | 132.09  |
| 6 | 55394834 | 55404863 | 10.029  |
| 6 | 55465800 | 55536660 | 70.86   |
| 6 | 55547513 | 55599122 | 51.609  |
| 6 | 55614992 | 55619276 | 4.284   |
| 6 | 55651222 | 55659620 | 8.398   |
| 6 | 55661929 | 55681197 | 19.268  |
| 6 | 55683035 | 55726641 | 43.606  |
| 6 | 55786919 | 55801825 | 14.906  |
| 6 | 55827038 | 56147959 | 320.921 |
| 6 | 56153960 | 56241585 | 87.625  |
| 6 | 56301477 | 56376394 | 74.917  |
| 6 | 56413264 | 56417389 | 4.125   |
| 6 | 56450692 | 56462070 | 11.378  |
| 6 | 56477063 | 56517161 | 40.098  |

|   |          |          |         |
|---|----------|----------|---------|
| 6 | 56517709 | 56753924 | 236.215 |
| 6 | 56761271 | 56771583 | 10.312  |
| 6 | 56771602 | 56845741 | 74.139  |
| 6 | 56939861 | 56954604 | 14.743  |
| 6 | 56959519 | 56982822 | 23.303  |
| 6 | 56993064 | 56993380 | 0.316   |
| 6 | 57027881 | 57032183 | 4.302   |
| 6 | 57133014 | 57152989 | 19.975  |
| 6 | 57181619 | 57230118 | 48.499  |
| 6 | 57230150 | 57267095 | 36.945  |
| 6 | 57270592 | 57300846 | 30.254  |
| 6 | 57327314 | 57440561 | 113.247 |
| 6 | 57547402 | 57561077 | 13.675  |
| 6 | 57610477 | 57738482 | 128.005 |
| 6 | 57776594 | 57810167 | 33.573  |
| 6 | 57876829 | 57908291 | 31.462  |
| 6 | 58022415 | 58022877 | 0.462   |
| 6 | 58056980 | 58088782 | 31.802  |
| 6 | 58241058 | 58344858 | 103.8   |
| 6 | 58449274 | 58586095 | 136.821 |
| 6 | 58602627 | 58642867 | 40.24   |
| 6 | 58658167 | 58916478 | 258.311 |
| 6 | 58940306 | 59028593 | 88.287  |
| 6 | 59101686 | 59181343 | 79.657  |
| 6 | 59321951 | 59321970 | 0.019   |
| 6 | 59338626 | 59338643 | 0.017   |
| 6 | 59347639 | 59369030 | 21.391  |
| 6 | 59369920 | 59373887 | 3.967   |
| 6 | 59379265 | 59395782 | 16.517  |
| 6 | 59433377 | 59463660 | 30.283  |
| 6 | 59464674 | 59509064 | 44.39   |
| 6 | 59524508 | 59526731 | 2.223   |
| 6 | 59527216 | 59527442 | 0.226   |
| 6 | 59529042 | 59529067 | 0.025   |
| 6 | 59529094 | 59529129 | 0.035   |
| 6 | 59534256 | 59537670 | 3.414   |
| 6 | 59559862 | 59584587 | 24.725  |
| 6 | 59590391 | 59594033 | 3.642   |
| 6 | 59594050 | 59594359 | 0.309   |
| 6 | 59597262 | 59597270 | 0.008   |
| 6 | 59627701 | 59627729 | 0.028   |
| 6 | 59627797 | 59637627 | 9.83    |
| 6 | 59757500 | 59757668 | 0.168   |
| 6 | 59757902 | 59843188 | 85.286  |
| 6 | 59871023 | 59928394 | 57.371  |
| 6 | 60058805 | 60071984 | 13.179  |
| 6 | 60097249 | 60222498 | 125.249 |
| 6 | 60370930 | 60372435 | 1.505   |
| 6 | 60398404 | 60441513 | 43.109  |
| 6 | 60451665 | 60477157 | 25.492  |
| 6 | 60489633 | 60516156 | 26.523  |
| 6 | 60525640 | 60538408 | 12.768  |
| 6 | 60541411 | 60564003 | 22.592  |
| 6 | 60682906 | 60829550 | 146.644 |
| 6 | 60830826 | 60831025 | 0.199   |
| 6 | 60831130 | 61000364 | 169.234 |
| 6 | 61000510 | 61044095 | 43.585  |
| 6 | 61074439 | 61080924 | 6.485   |
| 6 | 61107436 | 61107452 | 0.016   |
| 6 | 61136479 | 61148555 | 12.076  |
| 6 | 61265626 | 61265652 | 0.026   |

|   |          |          |          |
|---|----------|----------|----------|
| 6 | 61267380 | 61336043 | 68.663   |
| 6 | 61376003 | 61400494 | 24.491   |
| 6 | 61413771 | 61414392 | 0.621    |
| 6 | 61477504 | 61695005 | 217.501  |
| 6 | 61788644 | 61954503 | 165.859  |
| 6 | 61958263 | 61963607 | 5.344    |
| 6 | 62098874 | 62550648 | 451.774  |
| 6 | 62582346 | 62659525 | 77.179   |
| 6 | 62714097 | 62784281 | 70.184   |
| 6 | 62898224 | 62942292 | 44.068   |
| 6 | 63023782 | 63028541 | 4.759    |
| 6 | 63124164 | 63137732 | 13.568   |
| 6 | 63139676 | 63188640 | 48.964   |
| 6 | 63210830 | 63292113 | 81.283   |
| 6 | 63321289 | 63420534 | 99.245   |
| 6 | 63584461 | 64630879 | 1046.418 |
| 6 | 64770914 | 65002533 | 231.619  |
| 6 | 65002535 | 65132027 | 129.492  |
| 6 | 65132067 | 65624966 | 492.899  |
| 6 | 65636639 | 65647014 | 10.375   |
| 6 | 65654942 | 65655545 | 0.603    |
| 6 | 65663351 | 65664642 | 1.291    |
| 6 | 65664648 | 66210397 | 545.749  |
| 6 | 66239492 | 66623779 | 384.287  |
| 6 | 66688760 | 66708655 | 19.895   |
| 6 | 66817310 | 67066572 | 249.262  |
| 6 | 67087273 | 67117428 | 30.155   |
| 6 | 67121428 | 67610227 | 488.799  |
| 6 | 67610228 | 67785397 | 175.169  |
| 6 | 67821758 | 67832007 | 10.249   |
| 6 | 67842900 | 67861005 | 18.105   |
| 6 | 67888874 | 68064272 | 175.398  |
| 6 | 68198073 | 68253094 | 55.021   |
| 6 | 68306844 | 68467363 | 160.519  |
| 6 | 68467702 | 68467712 | 0.01     |
| 6 | 68588974 | 68605809 | 16.835   |
| 6 | 68620699 | 68847472 | 226.773  |
| 6 | 68877331 | 68913083 | 35.752   |
| 6 | 68916738 | 69051057 | 134.319  |
| 6 | 69186853 | 69186890 | 0.037    |
| 6 | 69251112 | 69253594 | 2.482    |
| 6 | 69266266 | 69372193 | 105.927  |
| 6 | 69464986 | 69841557 | 376.571  |
| 6 | 70029163 | 70141641 | 112.478  |
| 6 | 70188456 | 70188477 | 0.021    |
| 6 | 70259429 | 70375726 | 116.297  |
| 6 | 70673577 | 70706555 | 32.978   |
| 6 | 70819480 | 71182198 | 362.718  |
| 6 | 71182202 | 71893135 | 710.933  |
| 6 | 71903244 | 72225968 | 322.724  |
| 6 | 72572017 | 72756787 | 184.77   |
| 6 | 72909325 | 73136041 | 226.716  |
| 6 | 73312307 | 73312316 | 0.009    |
| 6 | 73482792 | 73537163 | 54.371   |
| 6 | 73546265 | 73849249 | 302.984  |
| 6 | 73857814 | 74246012 | 388.198  |
| 6 | 74249533 | 74982104 | 732.571  |
| 6 | 79015968 | 79938107 | 922.139  |
| 6 | 79957261 | 80126646 | 169.385  |
| 6 | 80217128 | 80388179 | 171.051  |
| 6 | 80403295 | 80420668 | 17.373   |

|   |           |           |          |
|---|-----------|-----------|----------|
| 6 | 81066727  | 82665676  | 1598.949 |
| 6 | 82694401  | 82881579  | 187.178  |
| 6 | 82886963  | 83237721  | 350.758  |
| 6 | 83338846  | 83349578  | 10.732   |
| 6 | 83369219  | 83379670  | 10.451   |
| 6 | 83408429  | 83697984  | 289.555  |
| 6 | 83833265  | 84497747  | 664.482  |
| 6 | 84499921  | 84516231  | 16.31    |
| 6 | 84522876  | 84546224  | 23.348   |
| 6 | 84612637  | 85936545  | 1323.908 |
| 6 | 85989332  | 87640811  | 1651.479 |
| 6 | 87864480  | 88075940  | 211.46   |
| 6 | 88195729  | 88672299  | 476.57   |
| 6 | 88679430  | 88679473  | 0.043    |
| 6 | 88681693  | 88685087  | 3.394    |
| 6 | 88689546  | 88754916  | 65.37    |
| 6 | 88760746  | 88764283  | 3.537    |
| 6 | 88798069  | 88997478  | 199.409  |
| 6 | 89075054  | 89649096  | 574.042  |
| 6 | 89763020  | 90394003  | 630.983  |
| 6 | 91108234  | 92580529  | 1472.295 |
| 6 | 93471336  | 93823233  | 351.897  |
| 6 | 94085683  | 94828601  | 742.918  |
| 6 | 94902142  | 94903566  | 1.424    |
| 6 | 94905205  | 95081588  | 176.383  |
| 6 | 95108364  | 95258716  | 150.352  |
| 6 | 95292069  | 95315969  | 23.9     |
| 6 | 95415626  | 95481149  | 65.523   |
| 6 | 95561181  | 95669221  | 108.04   |
| 6 | 95929742  | 96054136  | 124.394  |
| 6 | 96054147  | 96186101  | 131.954  |
| 6 | 96262088  | 96285844  | 23.756   |
| 6 | 96289379  | 97235674  | 946.295  |
| 6 | 97244503  | 97537721  | 293.218  |
| 6 | 97651555  | 98840854  | 1189.299 |
| 6 | 99437673  | 99721247  | 283.574  |
| 6 | 100841047 | 101538880 | 697.833  |
| 6 | 101982971 | 102333439 | 350.468  |
| 6 | 102507882 | 102719382 | 211.5    |
| 6 | 102790923 | 102863081 | 72.158   |
| 6 | 102909716 | 102928255 | 18.539   |
| 6 | 103097275 | 103631493 | 534.218  |
| 6 | 103638106 | 103720136 | 82.03    |
| 6 | 103820760 | 103820794 | 0.034    |
| 6 | 103908739 | 104244896 | 336.157  |
| 6 | 104244950 | 104329571 | 84.621   |
| 6 | 104337299 | 104579269 | 241.97   |
| 6 | 104579338 | 104579519 | 0.181    |
| 6 | 104586936 | 104946014 | 359.078  |
| 6 | 104955799 | 105207664 | 251.865  |
| 6 | 105315405 | 105325482 | 10.077   |
| 6 | 105362149 | 106140393 | 778.244  |
| 6 | 106200014 | 106223951 | 23.937   |
| 6 | 106235360 | 106253992 | 18.632   |
| 6 | 106254004 | 106593123 | 339.119  |
| 6 | 106802144 | 106820638 | 18.494   |
| 6 | 106959062 | 107131572 | 172.51   |
| 6 | 107167632 | 107174874 | 7.242    |
| 6 | 107340058 | 107393489 | 53.431   |
| 6 | 107408430 | 107605269 | 196.839  |
| 6 | 107624343 | 107636144 | 11.801   |

|   |           |           |         |
|---|-----------|-----------|---------|
| 6 | 107663053 | 107699397 | 36.344  |
| 6 | 107705418 | 107743232 | 37.814  |
| 6 | 107743488 | 107743490 | 0.002   |
| 6 | 107753877 | 107804752 | 50.875  |
| 6 | 107977859 | 108051643 | 73.784  |
| 6 | 108123466 | 108123655 | 0.189   |
| 6 | 108212998 | 108231136 | 18.138  |
| 6 | 108270662 | 108286516 | 15.854  |
| 6 | 108315132 | 108315264 | 0.132   |
| 6 | 108397059 | 108421176 | 24.117  |
| 6 | 108421205 | 108440190 | 18.985  |
| 6 | 108476241 | 108656496 | 180.255 |
| 6 | 108660151 | 108681819 | 21.668  |
| 6 | 108709047 | 108867838 | 158.791 |
| 6 | 108882849 | 108885604 | 2.755   |
| 6 | 109229838 | 109234751 | 4.913   |
| 6 | 109234763 | 109737230 | 502.467 |
| 6 | 109737241 | 109876062 | 138.821 |
| 6 | 109877393 | 109894513 | 17.12   |
| 6 | 109943357 | 110006606 | 63.249  |
| 6 | 110131451 | 110203575 | 72.124  |
| 6 | 110203632 | 110718690 | 515.058 |
| 6 | 110718698 | 110718801 | 0.103   |
| 6 | 110765584 | 110777639 | 12.055  |
| 6 | 110826851 | 110893219 | 66.368  |
| 6 | 110973264 | 111131775 | 158.511 |
| 6 | 111235271 | 111376772 | 141.501 |
| 6 | 111389437 | 111405608 | 16.171  |
| 6 | 111469492 | 111754264 | 284.772 |
| 6 | 111796324 | 111865994 | 69.67   |
| 6 | 111983605 | 112013387 | 29.782  |
| 6 | 112016448 | 112057883 | 41.435  |
| 6 | 112057955 | 112091220 | 33.265  |
| 6 | 112113283 | 112312135 | 198.852 |
| 6 | 112312154 | 112441225 | 129.071 |
| 6 | 112456482 | 112536809 | 80.327  |
| 6 | 112634552 | 112805154 | 170.602 |
| 6 | 112810549 | 112836455 | 25.906  |
| 6 | 112836463 | 112836702 | 0.239   |
| 6 | 112838371 | 112856677 | 18.306  |
| 6 | 112944041 | 112987375 | 43.334  |
| 6 | 113012925 | 113041251 | 28.326  |
| 6 | 113066900 | 113941347 | 874.447 |
| 6 | 114333623 | 114395165 | 61.542  |
| 6 | 114663014 | 114854723 | 191.709 |
| 6 | 114935703 | 114964834 | 29.131  |
| 6 | 115317804 | 116198100 | 880.296 |
| 6 | 116254971 | 116297240 | 42.269  |
| 6 | 116299022 | 116454735 | 155.713 |
| 6 | 116544052 | 116553900 | 9.848   |
| 6 | 116566890 | 116568896 | 2.006   |
| 6 | 116651747 | 116698679 | 46.932  |
| 6 | 116703415 | 116709668 | 6.253   |
| 6 | 116876057 | 116925854 | 49.797  |
| 6 | 116937458 | 116937630 | 0.172   |
| 6 | 116938891 | 116939167 | 0.276   |
| 6 | 116950944 | 116973111 | 22.167  |
| 6 | 116975136 | 117072128 | 96.992  |
| 6 | 117101318 | 117103130 | 1.812   |
| 6 | 117123298 | 117189142 | 65.844  |
| 6 | 117212024 | 117243615 | 31.591  |

|   |           |           |         |
|---|-----------|-----------|---------|
| 6 | 117244017 | 117401258 | 157.241 |
| 6 | 117401431 | 117458240 | 56.809  |
| 6 | 117483527 | 117579197 | 95.67   |
| 6 | 117581655 | 117584477 | 2.822   |
| 6 | 117585457 | 117602133 | 16.676  |
| 6 | 117606735 | 117606924 | 0.189   |
| 6 | 117611390 | 117711517 | 100.127 |
| 6 | 117711777 | 117736192 | 24.415  |
| 6 | 117740401 | 117750081 | 9.68    |
| 6 | 117760722 | 117912476 | 151.754 |
| 6 | 117940852 | 117940875 | 0.023   |
| 6 | 118004709 | 118004719 | 0.01    |
| 6 | 118032339 | 118065236 | 32.897  |
| 6 | 118065329 | 118065351 | 0.022   |
| 6 | 118082583 | 118791455 | 708.872 |
| 6 | 118908952 | 119130099 | 221.147 |
| 6 | 119137914 | 119174122 | 36.208  |
| 6 | 119198939 | 119344591 | 145.652 |
| 6 | 119366914 | 119554687 | 187.773 |
| 6 | 119557058 | 119598009 | 40.951  |
| 6 | 119691868 | 119692306 | 0.438   |
| 6 | 119737708 | 119739164 | 1.456   |
| 6 | 119807329 | 119807460 | 0.131   |
| 6 | 119818279 | 119828306 | 10.027  |
| 6 | 119844843 | 119844863 | 0.02    |
| 6 | 119848242 | 119853816 | 5.574   |
| 6 | 119859847 | 119860014 | 0.167   |
| 6 | 119860825 | 119860832 | 0.007   |
| 6 | 119923043 | 119923647 | 0.604   |
| 6 | 119946246 | 119951323 | 5.077   |
| 6 | 119974000 | 119978525 | 4.525   |
| 6 | 120045421 | 120063981 | 18.56   |
| 6 | 120065547 | 120108969 | 43.422  |
| 6 | 120263435 | 120263478 | 0.043   |
| 6 | 120272168 | 120507283 | 235.115 |
| 6 | 120558463 | 120558508 | 0.045   |
| 6 | 120565875 | 120676279 | 110.404 |
| 6 | 120734777 | 120804774 | 69.997  |
| 6 | 120867862 | 120960727 | 92.865  |
| 6 | 120990750 | 120992970 | 2.22    |
| 6 | 120998398 | 120998469 | 0.071   |
| 6 | 121003574 | 121341870 | 338.296 |
| 6 | 121351580 | 121381282 | 29.702  |
| 6 | 121381315 | 121452462 | 71.147  |
| 6 | 121455724 | 121467618 | 11.894  |
| 6 | 121500624 | 121523770 | 23.146  |
| 6 | 121541709 | 121622695 | 80.986  |
| 6 | 121671309 | 121674954 | 3.645   |
| 6 | 121724613 | 121724738 | 0.125   |
| 6 | 121750127 | 121753563 | 3.436   |
| 6 | 121762191 | 122202293 | 440.102 |
| 6 | 122204600 | 122216367 | 11.767  |
| 6 | 122216603 | 122217574 | 0.971   |
| 6 | 122221220 | 122223056 | 1.836   |
| 6 | 122224115 | 122224138 | 0.023   |
| 6 | 122224371 | 122224417 | 0.046   |
| 6 | 122224941 | 122224948 | 0.007   |
| 6 | 122287108 | 122454543 | 167.435 |
| 6 | 122544989 | 122918542 | 373.553 |
| 6 | 122971066 | 123285963 | 314.897 |
| 7 | 69422     | 166053    | 96.631  |



|   |         |         |         |
|---|---------|---------|---------|
| 7 | 176585  | 263853  | 87.268  |
| 7 | 268707  | 268720  | 0.013   |
| 7 | 598612  | 714882  | 116.27  |
| 7 | 744340  | 744352  | 0.012   |
| 7 | 802356  | 842249  | 39.893  |
| 7 | 933870  | 1141408 | 207.538 |
| 7 | 1229909 | 1305257 | 75.348  |
| 7 | 1312771 | 1787095 | 474.324 |
| 7 | 1805306 | 1907796 | 102.49  |
| 7 | 1990447 | 2076000 | 85.553  |
| 7 | 2107290 | 2212021 | 104.731 |
| 7 | 2212025 | 2230651 | 18.626  |
| 7 | 2231691 | 2294165 | 62.474  |
| 7 | 2299258 | 2340703 | 41.445  |
| 7 | 2410487 | 2418988 | 8.501   |
| 7 | 2436030 | 2508505 | 72.475  |
| 7 | 2523716 | 2523730 | 0.014   |
| 7 | 2525662 | 2545337 | 19.675  |
| 7 | 2583283 | 2633689 | 50.406  |
| 7 | 2637886 | 2641292 | 3.406   |
| 7 | 2689875 | 2738978 | 49.103  |
| 7 | 2777268 | 2783027 | 5.759   |
| 7 | 2786370 | 2786386 | 0.016   |
| 7 | 2844073 | 3048087 | 204.014 |
| 7 | 3048426 | 3264934 | 216.508 |
| 7 | 3277047 | 3291293 | 14.246  |
| 7 | 3291446 | 3291469 | 0.023   |
| 7 | 3306158 | 3310489 | 4.331   |
| 7 | 3329429 | 3393562 | 64.133  |
| 7 | 3518234 | 3730627 | 212.393 |
| 7 | 3934929 | 3956930 | 22.001  |
| 7 | 4130605 | 4173027 | 42.422  |
| 7 | 4189398 | 4198696 | 9.298   |
| 7 | 4229754 | 4295737 | 65.983  |
| 7 | 4295745 | 4324334 | 28.589  |
| 7 | 4324526 | 4362086 | 37.56   |
| 7 | 4410717 | 4450791 | 40.074  |
| 7 | 4452720 | 4523446 | 70.726  |
| 7 | 4587510 | 4606104 | 18.594  |
| 7 | 4613410 | 4929299 | 315.889 |
| 7 | 4945536 | 5072108 | 126.572 |
| 7 | 5097493 | 5167227 | 69.734  |
| 7 | 5192111 | 5192820 | 0.709   |
| 7 | 5299886 | 5332612 | 32.726  |
| 7 | 5341451 | 5394603 | 53.152  |
| 7 | 5394678 | 5410305 | 15.627  |
| 7 | 5430094 | 5558955 | 128.861 |
| 7 | 5712253 | 5712273 | 0.02    |
| 7 | 5745467 | 5788396 | 42.929  |
| 7 | 5885660 | 6041167 | 155.507 |
| 7 | 6221057 | 6571206 | 350.149 |
| 7 | 6703367 | 6923185 | 219.818 |
| 7 | 7092515 | 7152735 | 60.22   |
| 7 | 7267361 | 7280438 | 13.077  |
| 7 | 7410604 | 7619419 | 208.815 |
| 7 | 7709290 | 7758819 | 49.529  |
| 7 | 7782467 | 8090936 | 308.469 |
| 7 | 8092615 | 8154724 | 62.109  |
| 7 | 8203220 | 8204322 | 1.102   |
| 7 | 8254652 | 8295242 | 40.59   |
| 7 | 8304105 | 9061363 | 757.258 |

|   |          |          |          |
|---|----------|----------|----------|
| 7 | 9101326  | 9119481  | 18.155   |
| 7 | 9123657  | 9628375  | 504.718  |
| 7 | 9669970  | 9828071  | 158.101  |
| 7 | 9840146  | 10099660 | 259.514  |
| 7 | 10137015 | 10184203 | 47.188   |
| 7 | 10265088 | 10600353 | 335.265  |
| 7 | 10600369 | 10947122 | 346.753  |
| 7 | 10975624 | 11049151 | 73.527   |
| 7 | 11049159 | 11052769 | 3.61     |
| 7 | 11053794 | 11084521 | 30.727   |
| 7 | 11100930 | 11282230 | 181.3    |
| 7 | 11297822 | 11361137 | 63.315   |
| 7 | 11373321 | 11398513 | 25.192   |
| 7 | 11402729 | 11495779 | 93.05    |
| 7 | 11652787 | 11657130 | 4.343    |
| 7 | 11949487 | 11978321 | 28.834   |
| 7 | 12069455 | 12252484 | 183.029  |
| 7 | 12408968 | 12415657 | 6.689    |
| 7 | 12560245 | 12560342 | 0.097    |
| 7 | 12564049 | 12705798 | 141.749  |
| 7 | 12710183 | 12710349 | 0.166    |
| 7 | 12720650 | 12720839 | 0.189    |
| 7 | 12772729 | 12792918 | 20.189   |
| 7 | 12792921 | 13063688 | 270.767  |
| 7 | 13330051 | 14375651 | 1045.6   |
| 7 | 15876375 | 15952924 | 76.549   |
| 7 | 16557556 | 17063508 | 505.952  |
| 7 | 17065371 | 17399674 | 334.303  |
| 7 | 17405442 | 17410036 | 4.594    |
| 7 | 17413054 | 17461641 | 48.587   |
| 7 | 17475380 | 17692998 | 217.618  |
| 7 | 17773163 | 17949429 | 176.266  |
| 7 | 18126411 | 18306784 | 180.373  |
| 7 | 18438256 | 20137653 | 1699.397 |
| 7 | 20137665 | 20372444 | 234.779  |
| 7 | 20405662 | 20405699 | 0.037    |
| 7 | 20560045 | 20650316 | 90.271   |
| 7 | 20842642 | 21288756 | 446.114  |
| 7 | 21418548 | 21486040 | 67.492   |
| 7 | 21527118 | 21537332 | 10.214   |
| 7 | 21557000 | 21770323 | 213.323  |
| 7 | 21804311 | 21871568 | 67.257   |
| 7 | 21872974 | 22082970 | 209.996  |
| 7 | 22087772 | 22088004 | 0.232    |
| 7 | 22458425 | 22464595 | 6.17     |
| 7 | 22465923 | 22547130 | 81.207   |
| 7 | 22561336 | 22656242 | 94.906   |
| 7 | 22853068 | 23432635 | 579.567  |
| 7 | 23642233 | 23676498 | 34.265   |
| 7 | 23684283 | 24257472 | 573.189  |
| 7 | 24378220 | 24378233 | 0.013    |
| 7 | 24378252 | 24378277 | 0.025    |
| 7 | 24378278 | 24382872 | 4.594    |
| 7 | 24434404 | 24445713 | 11.309   |
| 7 | 24445726 | 24445811 | 0.085    |
| 7 | 24445854 | 24452890 | 7.036    |
| 7 | 24453007 | 24453055 | 0.048    |
| 7 | 24462506 | 24462517 | 0.011    |
| 7 | 24462522 | 24462530 | 0.008    |
| 7 | 24462534 | 24462544 | 0.01     |
| 7 | 24467459 | 24489767 | 22.308   |

|   |          |          |          |
|---|----------|----------|----------|
| 7 | 24491950 | 24507642 | 15.692   |
| 7 | 24514192 | 24520750 | 6.558    |
| 7 | 24531936 | 24531963 | 0.027    |
| 7 | 24539249 | 24567402 | 28.153   |
| 7 | 24600286 | 24625122 | 24.836   |
| 7 | 24636775 | 25172920 | 536.145  |
| 7 | 25460778 | 25521832 | 61.054   |
| 7 | 25608845 | 25608995 | 0.15     |
| 7 | 25636922 | 25878602 | 241.68   |
| 7 | 26024584 | 26024683 | 0.099    |
| 7 | 26055978 | 26056001 | 0.023    |
| 7 | 26346885 | 27409692 | 1062.807 |
| 7 | 27450732 | 27450764 | 0.032    |
| 7 | 27473020 | 27548974 | 75.954   |
| 7 | 27594395 | 27594426 | 0.031    |
| 7 | 27656379 | 27688570 | 32.191   |
| 7 | 27716750 | 27800633 | 83.883   |
| 7 | 27854288 | 27877943 | 23.655   |
| 7 | 27893948 | 27914654 | 20.706   |
| 7 | 27914701 | 27919489 | 4.788    |
| 7 | 27990349 | 27994817 | 4.468    |
| 7 | 28107806 | 28107846 | 0.04     |
| 7 | 28117987 | 28118021 | 0.034    |
| 7 | 28127934 | 28155283 | 27.349   |
| 7 | 28177415 | 29102546 | 925.131  |
| 7 | 29154613 | 29205369 | 50.756   |
| 7 | 29612562 | 29928513 | 315.951  |
| 7 | 30029640 | 30126022 | 96.382   |
| 7 | 30673916 | 30713709 | 39.793   |
| 7 | 30713892 | 31303365 | 589.473  |
| 7 | 31328420 | 31403571 | 75.151   |
| 7 | 31480839 | 31625637 | 144.798  |
| 7 | 31667932 | 31667938 | 0.006    |
| 7 | 31667941 | 31675207 | 7.266    |
| 7 | 31694177 | 31696015 | 1.838    |
| 7 | 31706573 | 31709988 | 3.415    |
| 7 | 31709993 | 31766199 | 56.206   |
| 7 | 31856347 | 31954823 | 98.476   |
| 7 | 32207256 | 32417437 | 210.181  |
| 7 | 32834190 | 32953449 | 119.259  |
| 7 | 33096910 | 33187268 | 90.358   |
| 7 | 33191481 | 33250590 | 59.109   |
| 7 | 33311195 | 33399122 | 87.927   |
| 7 | 33417349 | 33507057 | 89.708   |
| 7 | 33562913 | 33564069 | 1.156    |
| 7 | 33626152 | 33706155 | 80.003   |
| 7 | 33708734 | 33844596 | 135.862  |
| 7 | 34053581 | 34060414 | 6.833    |
| 7 | 34080492 | 34086939 | 6.447    |
| 7 | 34099177 | 34130289 | 31.112   |
| 7 | 34178795 | 34222055 | 43.26    |
| 7 | 34236123 | 34253158 | 17.035   |
| 7 | 34291435 | 34294657 | 3.222    |
| 7 | 34304172 | 34304667 | 0.495    |
| 7 | 34304673 | 34375790 | 71.117   |
| 7 | 34417845 | 34435523 | 17.678   |
| 7 | 34440786 | 34470771 | 29.985   |
| 7 | 34498305 | 34612796 | 114.491  |
| 7 | 34613122 | 34621213 | 8.091    |
| 7 | 34633949 | 34644755 | 10.806   |
| 7 | 34737467 | 34737481 | 0.014    |

|   |          |          |         |
|---|----------|----------|---------|
| 7 | 34823233 | 34921983 | 98.75   |
| 7 | 34931488 | 35313045 | 381.557 |
| 7 | 35372775 | 35424306 | 51.531  |
| 7 | 35445993 | 35453079 | 7.086   |
| 7 | 35614817 | 35695406 | 80.589  |
| 7 | 35738048 | 35761152 | 23.104  |
| 7 | 35955236 | 36206188 | 250.952 |
| 7 | 36206232 | 36213671 | 7.439   |
| 7 | 36241998 | 36655441 | 413.443 |
| 7 | 36672008 | 36731871 | 59.863  |
| 7 | 36732312 | 37006510 | 274.198 |
| 7 | 37036325 | 37100969 | 64.644  |
| 7 | 37137767 | 37233576 | 95.809  |
| 7 | 37334795 | 37373461 | 38.666  |
| 7 | 37452035 | 37772079 | 320.044 |
| 7 | 37792671 | 37792717 | 0.046   |
| 7 | 37835605 | 37868836 | 33.231  |
| 7 | 37868926 | 37882108 | 13.182  |
| 7 | 37884927 | 37903676 | 18.749  |
| 7 | 38624982 | 38664981 | 39.999  |
| 7 | 38673815 | 38673843 | 0.028   |
| 7 | 38681442 | 39259387 | 577.945 |
| 7 | 39292668 | 39302988 | 10.32   |
| 7 | 39337507 | 39403812 | 66.305  |
| 7 | 39485163 | 39632171 | 147.008 |
| 7 | 39678704 | 39703275 | 24.571  |
| 7 | 39703287 | 39818452 | 115.165 |
| 7 | 39862064 | 40230607 | 368.543 |
| 7 | 40265040 | 40286134 | 21.094  |
| 7 | 40318935 | 40318946 | 0.011   |
| 7 | 40380646 | 40821197 | 440.551 |
| 7 | 40873587 | 40890089 | 16.502  |
| 7 | 40929792 | 40932331 | 2.539   |
| 7 | 40994173 | 41227165 | 232.992 |
| 7 | 41269221 | 41275630 | 6.409   |
| 7 | 41295855 | 41301566 | 5.711   |
| 7 | 41301584 | 41406035 | 104.451 |
| 7 | 41876330 | 41925339 | 49.009  |
| 7 | 42010018 | 42027630 | 17.612  |
| 7 | 42059472 | 42073943 | 14.471  |
| 7 | 42082316 | 42102494 | 20.178  |
| 7 | 42113358 | 42121912 | 8.554   |
| 7 | 42171806 | 42238158 | 66.352  |
| 7 | 42238284 | 42242469 | 4.185   |
| 7 | 42246973 | 42264452 | 17.479  |
| 7 | 42292278 | 42300371 | 8.093   |
| 7 | 42312810 | 42327365 | 14.555  |
| 7 | 42347609 | 42467169 | 119.56  |
| 7 | 42489585 | 42645787 | 156.202 |
| 7 | 42658188 | 42745464 | 87.276  |
| 7 | 42925633 | 43812618 | 886.985 |
| 7 | 43836765 | 43890393 | 53.628  |
| 7 | 43905828 | 43905875 | 0.047   |
| 7 | 43939639 | 43939728 | 0.089   |
| 7 | 43939764 | 43939806 | 0.042   |
| 7 | 43939823 | 43943951 | 4.128   |
| 7 | 43973443 | 44025996 | 52.553  |
| 7 | 44664442 | 44815886 | 151.444 |
| 7 | 45173840 | 45173935 | 0.095   |
| 7 | 45204045 | 45279007 | 74.962  |
| 7 | 45312195 | 45574460 | 262.265 |

|   |          |          |         |
|---|----------|----------|---------|
| 7 | 45574557 | 45670173 | 95.616  |
| 7 | 45691436 | 45700699 | 9.263   |
| 7 | 45781105 | 45807708 | 26.603  |
| 7 | 45821420 | 45825154 | 3.734   |
| 7 | 45960431 | 46002965 | 42.534  |
| 7 | 46164795 | 47077168 | 912.373 |
| 7 | 47102106 | 47102780 | 0.674   |
| 7 | 47117923 | 47167994 | 50.071  |
| 7 | 47171784 | 47188331 | 16.547  |
| 7 | 47236656 | 47245386 | 8.73    |
| 7 | 47251653 | 47251785 | 0.132   |
| 7 | 47288948 | 47289001 | 0.053   |
| 7 | 47765161 | 47854698 | 89.537  |
| 7 | 48359474 | 48451803 | 92.329  |
| 7 | 48525656 | 48866391 | 340.735 |
| 7 | 48866401 | 48992306 | 125.905 |
| 7 | 49030654 | 49072005 | 41.351  |
| 7 | 49098913 | 49457247 | 358.334 |
| 7 | 49464888 | 50394312 | 929.424 |
| 7 | 50439248 | 50769042 | 329.794 |
| 7 | 50975270 | 52291250 | 1315.98 |
| 7 | 52312721 | 52391087 | 78.366  |
| 7 | 52467682 | 52839052 | 371.37  |
| 7 | 52882631 | 53037043 | 154.412 |
| 7 | 53038388 | 53106808 | 68.42   |
| 7 | 53111283 | 53270063 | 158.78  |
| 7 | 53416408 | 53537224 | 120.816 |
| 7 | 53622731 | 53692291 | 69.56   |
| 7 | 53706038 | 53822405 | 116.367 |
| 7 | 53830986 | 53837246 | 6.26    |
| 7 | 53841084 | 53972262 | 131.178 |
| 7 | 54012146 | 54111630 | 99.484  |
| 7 | 54113932 | 54255891 | 141.959 |
| 7 | 54280437 | 54280446 | 0.009   |
| 7 | 54308492 | 54314797 | 6.305   |
| 7 | 54341387 | 54379091 | 37.704  |
| 7 | 54496347 | 54496909 | 0.562   |
| 7 | 54703873 | 54800507 | 96.634  |
| 7 | 54829516 | 54837663 | 8.147   |
| 7 | 54935148 | 55079954 | 144.806 |
| 7 | 55092465 | 55101736 | 9.271   |
| 7 | 55115889 | 55116135 | 0.246   |
| 7 | 55135010 | 55135046 | 0.036   |
| 7 | 55167275 | 55172222 | 4.947   |
| 7 | 55255595 | 55290374 | 34.779  |
| 7 | 55291861 | 55300143 | 8.282   |
| 7 | 55344470 | 55368709 | 24.239  |
| 7 | 55419174 | 55419176 | 0.002   |
| 7 | 55419849 | 55787879 | 368.03  |
| 7 | 55793777 | 55878806 | 85.029  |
| 7 | 55965163 | 56033704 | 68.541  |
| 7 | 56064066 | 56064671 | 0.605   |
| 7 | 56083686 | 56197517 | 113.831 |
| 7 | 56197523 | 56235937 | 38.414  |
| 7 | 56315003 | 56451480 | 136.477 |
| 7 | 56532609 | 56586076 | 53.467  |
| 7 | 56709060 | 56728549 | 19.489  |
| 7 | 56728562 | 57031629 | 303.067 |
| 7 | 57036055 | 57351061 | 315.006 |
| 7 | 57518762 | 57518773 | 0.011   |
| 7 | 57528190 | 57892089 | 363.899 |

|   |          |          |          |
|---|----------|----------|----------|
| 7 | 57893530 | 58046368 | 152.838  |
| 7 | 58075344 | 58087576 | 12.232   |
| 7 | 58111733 | 58218316 | 106.583  |
| 7 | 58218330 | 58218355 | 0.025    |
| 7 | 58744108 | 59119538 | 375.43   |
| 7 | 59119554 | 59128264 | 8.71     |
| 7 | 59133987 | 59147397 | 13.41    |
| 7 | 59155764 | 59182630 | 26.866   |
| 7 | 59214446 | 59286196 | 71.75    |
| 7 | 59296305 | 59304640 | 8.335    |
| 7 | 59304681 | 59304962 | 0.281    |
| 7 | 59307224 | 59314581 | 7.357    |
| 7 | 59314950 | 59317318 | 2.368    |
| 7 | 59319772 | 59319792 | 0.02     |
| 7 | 59319937 | 59447982 | 128.045  |
| 7 | 59521787 | 59553052 | 31.265   |
| 7 | 59635398 | 59635507 | 0.109    |
| 7 | 59635523 | 59637479 | 1.956    |
| 7 | 59663784 | 59685564 | 21.78    |
| 7 | 59751423 | 59896236 | 144.813  |
| 7 | 59930522 | 59930536 | 0.014    |
| 7 | 59930696 | 60208493 | 277.797  |
| 7 | 60376678 | 60611448 | 234.77   |
| 7 | 60634050 | 60696974 | 62.924   |
| 7 | 60696980 | 61178647 | 481.667  |
| 7 | 61343563 | 62411617 | 1068.054 |
| 7 | 62445666 | 62559531 | 113.865  |
| 7 | 62624627 | 62833866 | 209.239  |
| 7 | 62835391 | 62840779 | 5.388    |
| 7 | 62862979 | 62950096 | 87.117   |
| 7 | 62976443 | 63122934 | 146.491  |
| 7 | 63224456 | 63533229 | 308.773  |
| 7 | 63554318 | 64245454 | 691.136  |
| 7 | 64280401 | 64413909 | 133.508  |
| 7 | 64424348 | 64569952 | 145.604  |
| 7 | 64628559 | 64678120 | 49.561   |
| 7 | 64707836 | 64905180 | 197.344  |
| 7 | 64906629 | 65188381 | 281.752  |
| 7 | 65303591 | 65843136 | 539.545  |
| 7 | 65843140 | 66427902 | 584.762  |
| 7 | 66430626 | 66437189 | 6.563    |
| 7 | 66438940 | 66438984 | 0.044    |
| 7 | 66444685 | 66444735 | 0.05     |
| 7 | 66609588 | 69604253 | 2994.665 |
| 7 | 70552801 | 71348188 | 795.387  |
| 7 | 71348207 | 71825869 | 477.662  |
| 7 | 71843663 | 73370568 | 1526.905 |
| 7 | 73370622 | 73425666 | 55.044   |
| 7 | 74160655 | 75059734 | 899.079  |
| 7 | 79139502 | 80376070 | 1236.568 |
| 7 | 80376073 | 80760269 | 384.196  |
| 7 | 80790244 | 80822130 | 31.886   |
| 7 | 80862051 | 81023336 | 161.285  |
| 7 | 81079520 | 81079542 | 0.022    |
| 7 | 81079591 | 81157484 | 77.893   |
| 7 | 81188995 | 81205642 | 16.647   |
| 7 | 81220405 | 81318289 | 97.884   |
| 7 | 81320185 | 81352058 | 31.873   |
| 7 | 81352169 | 81355807 | 3.638    |
| 7 | 81410683 | 81443958 | 33.275   |
| 7 | 81462202 | 81596100 | 133.898  |

|   |          |          |         |
|---|----------|----------|---------|
| 7 | 81688072 | 81734349 | 46.277  |
| 7 | 81783346 | 81784360 | 1.014   |
| 7 | 81820049 | 81880416 | 60.367  |
| 7 | 81882955 | 81935733 | 52.778  |
| 7 | 81950769 | 82137454 | 186.685 |
| 7 | 82165055 | 82315869 | 150.814 |
| 7 | 82392353 | 82425307 | 32.954  |
| 7 | 82432965 | 82450206 | 17.241  |
| 7 | 82620156 | 82620391 | 0.235   |
| 7 | 82621465 | 82678591 | 57.126  |
| 7 | 82778834 | 82895468 | 116.634 |
| 7 | 82934539 | 83229210 | 294.671 |
| 7 | 83604636 | 83720663 | 116.027 |
| 7 | 83758766 | 83758786 | 0.02    |
| 7 | 83758806 | 83803505 | 44.699  |
| 7 | 84764705 | 85356403 | 591.698 |
| 7 | 85795522 | 85795559 | 0.037   |
| 7 | 85807890 | 85807930 | 0.04    |
| 7 | 86727338 | 86952797 | 225.459 |
| 7 | 87723736 | 88338164 | 614.428 |
| 7 | 88622762 | 88860149 | 237.387 |
| 7 | 89138387 | 89226673 | 88.286  |
| 7 | 89242998 | 89250666 | 7.668   |
| 7 | 89298064 | 89309878 | 11.814  |
| 7 | 89868059 | 89995528 | 127.469 |
| 7 | 89997035 | 90059582 | 62.547  |
| 7 | 90063191 | 90458257 | 395.066 |
| 7 | 90522955 | 90578860 | 55.905  |
| 7 | 90891855 | 90897480 | 5.625   |
| 7 | 91178759 | 91180810 | 2.051   |
| 7 | 91388896 | 91546636 | 157.74  |
| 7 | 91961565 | 92635736 | 674.171 |
| 7 | 92672965 | 92738191 | 65.226  |
| 7 | 92884373 | 93076404 | 192.031 |
| 7 | 93313170 | 93334427 | 21.257  |
| 7 | 93334444 | 93484777 | 150.333 |
| 7 | 93508364 | 93708574 | 200.21  |
| 7 | 93765424 | 93796299 | 30.875  |
| 7 | 93804925 | 93816422 | 11.497  |
| 7 | 93824874 | 94637482 | 812.608 |
| 7 | 94638463 | 94658131 | 19.668  |
| 7 | 94735811 | 95076144 | 340.333 |
| 7 | 95175920 | 95176088 | 0.168   |
| 7 | 95365940 | 95379305 | 13.365  |
| 7 | 95379852 | 95382255 | 2.403   |
| 7 | 95383395 | 95383508 | 0.113   |
| 7 | 95402091 | 95460604 | 58.513  |
| 7 | 95635933 | 95635977 | 0.044   |
| 7 | 95694827 | 95860726 | 165.899 |
| 7 | 95918967 | 95921035 | 2.068   |
| 7 | 95923532 | 95997943 | 74.411  |
| 7 | 95997950 | 96325403 | 327.453 |
| 7 | 96327434 | 96329324 | 1.89    |
| 7 | 96331952 | 96879901 | 547.949 |
| 7 | 96879917 | 96970578 | 90.661  |
| 7 | 97085533 | 97220338 | 134.805 |
| 7 | 97288547 | 97317264 | 28.717  |
| 7 | 97339606 | 97488921 | 149.315 |
| 7 | 97511886 | 97682179 | 170.293 |
| 7 | 97697958 | 97919204 | 221.246 |
| 7 | 98328463 | 98328502 | 0.039   |

|   |           |           |          |
|---|-----------|-----------|----------|
| 7 | 98437964  | 99240584  | 802.62   |
| 7 | 99310584  | 99558340  | 247.756  |
| 7 | 99561411  | 99649561  | 88.15    |
| 7 | 99810102  | 100360567 | 550.465  |
| 7 | 100402844 | 100449441 | 46.597   |
| 7 | 100508651 | 100558271 | 49.62    |
| 7 | 100595740 | 100604566 | 8.826    |
| 7 | 100611884 | 100617789 | 5.905    |
| 7 | 100654112 | 100654542 | 0.43     |
| 7 | 100665548 | 100678460 | 12.912   |
| 7 | 100678605 | 100684691 | 6.086    |
| 7 | 100703442 | 100775415 | 71.973   |
| 7 | 100799156 | 100900149 | 100.993  |
| 7 | 100920150 | 100926346 | 6.196    |
| 7 | 100980738 | 100989780 | 9.042    |
| 7 | 101022530 | 101559823 | 537.293  |
| 7 | 101621303 | 101849322 | 228.019  |
| 7 | 101866084 | 101972499 | 106.415  |
| 7 | 102010431 | 102072897 | 62.466   |
| 7 | 102072905 | 102976190 | 903.285  |
| 7 | 102987524 | 103161346 | 173.822  |
| 7 | 103161395 | 103983595 | 822.2    |
| 7 | 105004287 | 105128365 | 124.078  |
| 7 | 105151049 | 105939816 | 788.767  |
| 7 | 105969273 | 106762669 | 793.396  |
| 7 | 106954899 | 107307516 | 352.617  |
| 7 | 107446783 | 107550208 | 103.425  |
| 7 | 107558311 | 107575884 | 17.573   |
| 7 | 107587838 | 107701168 | 113.33   |
| 7 | 107751141 | 107751205 | 0.064    |
| 7 | 107755094 | 107899035 | 143.941  |
| 7 | 107935300 | 108095777 | 160.477  |
| 7 | 108095783 | 108097571 | 1.788    |
| 7 | 108104195 | 108151325 | 47.13    |
| 7 | 108151600 | 108164762 | 13.162   |
| 7 | 108262248 | 108337318 | 75.07    |
| 7 | 108342805 | 108416821 | 74.016   |
| 7 | 108416857 | 108726820 | 309.963  |
| 7 | 108780676 | 108811407 | 30.731   |
| 7 | 108850440 | 108858484 | 8.044    |
| 7 | 108858485 | 108904291 | 45.806   |
| 7 | 109002186 | 109129211 | 127.025  |
| 7 | 109152821 | 109409635 | 256.814  |
| 7 | 109410279 | 109410319 | 0.04     |
| 7 | 109432268 | 109497329 | 65.061   |
| 7 | 109547792 | 109777042 | 229.25   |
| 7 | 109784682 | 109784714 | 0.032    |
| 7 | 109822895 | 110149392 | 326.497  |
| 7 | 110221032 | 110634712 | 413.68   |
| 7 | 110634866 | 110642534 | 7.668    |
| 7 | 110648412 | 110816507 | 168.095  |
| 7 | 110914119 | 111654097 | 739.978  |
| 7 | 112347484 | 113891983 | 1544.499 |
| 7 | 117209449 | 117403065 | 193.616  |
| 7 | 117736755 | 117763186 | 26.431   |
| 7 | 118003869 | 118061827 | 57.958   |
| 7 | 118084445 | 118108051 | 23.606   |
| 7 | 118112740 | 118559133 | 446.393  |
| 7 | 118652813 | 118740413 | 87.6     |
| 7 | 118743602 | 118897687 | 154.085  |
| 7 | 118979257 | 119007650 | 28.393   |



|   |           |           |         |
|---|-----------|-----------|---------|
| 7 | 119022806 | 119169550 | 146.744 |
| 7 | 119179302 | 119232537 | 53.235  |
| 7 | 119262748 | 119275739 | 12.991  |
| 7 | 119282056 | 119303094 | 21.038  |
| 7 | 119303115 | 119328255 | 25.14   |
| 7 | 119421338 | 119447951 | 26.613  |
| 7 | 119519802 | 119710832 | 191.03  |
| 7 | 119741441 | 119863306 | 121.865 |
| 7 | 119898136 | 119990392 | 92.256  |
| 7 | 119990494 | 120043420 | 52.926  |
| 7 | 120043606 | 120114289 | 70.683  |
| 7 | 120125735 | 120142175 | 16.44   |
| 7 | 120207558 | 120207619 | 0.061   |
| 7 | 120219921 | 120373942 | 154.021 |
| 7 | 120408125 | 120434541 | 26.416  |
| 7 | 120469525 | 120508065 | 38.54   |
| 7 | 120510569 | 120520535 | 9.966   |
| 7 | 120617694 | 120627990 | 10.296  |
| 7 | 120663874 | 120670317 | 6.443   |
| 7 | 120674643 | 120681080 | 6.437   |
| 7 | 120701846 | 120702023 | 0.177   |
| 7 | 120702029 | 120713060 | 11.031  |
| 7 | 120713228 | 120748398 | 35.17   |
| 7 | 120751798 | 120760371 | 8.573   |
| 7 | 120772977 | 120782949 | 9.972   |
| 7 | 120803314 | 120817361 | 14.047  |
| 7 | 120840565 | 120864975 | 24.41   |
| 7 | 120870409 | 120870625 | 0.216   |
| 7 | 120886738 | 120886952 | 0.214   |
| 7 | 120892118 | 120938308 | 46.19   |
| 7 | 121472048 | 121721632 | 249.584 |
| 7 | 121740807 | 121740824 | 0.017   |
| 7 | 121777572 | 121842292 | 64.72   |
| 7 | 121913863 | 121979986 | 66.123  |
| 7 | 121992300 | 121998392 | 6.092   |
| 7 | 122019411 | 122063890 | 44.479  |
| 7 | 122097792 | 122113844 | 16.052  |
| 7 | 122434832 | 122447212 | 12.38   |
| 7 | 122542219 | 122620520 | 78.301  |
| 7 | 122626719 | 122644200 | 17.481  |
| 7 | 122736161 | 123553792 | 817.631 |
| 7 | 123555071 | 123563077 | 8.006   |
| 7 | 123563095 | 123570530 | 7.435   |
| 7 | 123630365 | 123932370 | 302.005 |
| 7 | 123963299 | 123992875 | 29.576  |
| 7 | 123995742 | 123995790 | 0.048   |
| 7 | 124008690 | 124015142 | 6.452   |
| 7 | 124015322 | 124244476 | 229.154 |
| 7 | 124358271 | 124365104 | 6.833   |
| 7 | 124425406 | 124427942 | 2.536   |
| 7 | 124437987 | 124442942 | 4.955   |
| 7 | 124443024 | 124446441 | 3.417   |
| 7 | 124448631 | 124448760 | 0.129   |
| 7 | 124459287 | 124460289 | 1.002   |
| 7 | 124460309 | 124460601 | 0.292   |
| 7 | 124463119 | 124470667 | 7.548   |
| 7 | 124488008 | 124488029 | 0.021   |
| 7 | 124498253 | 124500238 | 1.985   |
| 7 | 124505833 | 124505860 | 0.027   |
| 7 | 124506030 | 124536685 | 30.655  |
| 7 | 125015432 | 125035405 | 19.973  |

|   |           |           |         |
|---|-----------|-----------|---------|
| 7 | 125035474 | 125200362 | 164.888 |
| 7 | 125225900 | 125235256 | 9.356   |
| 7 | 125384024 | 125397750 | 13.726  |
| 7 | 125398663 | 125401042 | 2.379   |
| 7 | 125401185 | 125409861 | 8.676   |
| 7 | 125427387 | 125513172 | 85.785  |
| 7 | 125539548 | 125543149 | 3.601   |
| 7 | 125570451 | 125573210 | 2.759   |
| 7 | 125627228 | 125659171 | 31.943  |
| 7 | 125721072 | 125928580 | 207.508 |
| 7 | 126015353 | 126072885 | 57.532  |
| 7 | 126088836 | 126106200 | 17.364  |
| 7 | 126118214 | 126118259 | 0.045   |
| 7 | 126141148 | 126177022 | 35.874  |
| 7 | 126177239 | 126209004 | 31.765  |
| 7 | 126316781 | 126436742 | 119.961 |
| 7 | 126552359 | 126712896 | 160.537 |
| 7 | 126732950 | 126793049 | 60.099  |
| 7 | 126837155 | 126871337 | 34.182  |
| 7 | 126959959 | 127098523 | 138.564 |
| 7 | 127276825 | 127512641 | 235.816 |
| 7 | 127512658 | 127899766 | 387.108 |
| 7 | 128083474 | 128323059 | 239.585 |
| 7 | 128323075 | 128438531 | 115.456 |
| 7 | 128527914 | 128561900 | 33.986  |
| 7 | 128595666 | 128905456 | 309.79  |
| 7 | 129153689 | 129322461 | 168.772 |
| 7 | 129372896 | 129453337 | 80.441  |
| 7 | 129458580 | 129458764 | 0.184   |
| 7 | 129472949 | 129483784 | 10.835  |
| 7 | 129499271 | 129540831 | 41.56   |
| 7 | 129571093 | 129598215 | 27.122  |
| 7 | 129614464 | 129639794 | 25.33   |
| 7 | 129654768 | 129660358 | 5.59    |
| 7 | 129677013 | 129720394 | 43.381  |
| 7 | 129801288 | 129825025 | 23.737  |
| 7 | 129833320 | 129833511 | 0.191   |
| 7 | 129847682 | 129862340 | 14.658  |
| 7 | 129871710 | 129891398 | 19.688  |
| 7 | 129893124 | 129925104 | 31.98   |
| 7 | 129925123 | 129954087 | 28.964  |
| 7 | 129985665 | 130000040 | 14.375  |
| 7 | 130029507 | 130080506 | 50.999  |
| 7 | 130265035 | 130265215 | 0.18    |
| 7 | 130273482 | 130307964 | 34.482  |
| 7 | 130314572 | 130343319 | 28.747  |
| 7 | 130389203 | 130560658 | 171.455 |
| 7 | 130619693 | 130619750 | 0.057   |
| 7 | 130694586 | 130708875 | 14.289  |
| 7 | 130726809 | 130727691 | 0.882   |
| 7 | 130737377 | 130737843 | 0.466   |
| 7 | 130737904 | 130751881 | 13.977  |
| 7 | 130770066 | 130770077 | 0.011   |
| 7 | 130794848 | 130796504 | 1.656   |
| 7 | 130803695 | 130810039 | 6.344   |
| 7 | 130811232 | 130816210 | 4.978   |
| 7 | 130816213 | 130818278 | 2.065   |
| 7 | 130857121 | 130875668 | 18.547  |
| 7 | 130911235 | 131011722 | 100.487 |
| 7 | 131011727 | 131011897 | 0.17    |
| 7 | 131032860 | 131117884 | 85.024  |

|   |           |           |         |
|---|-----------|-----------|---------|
| 7 | 131291332 | 131291655 | 0.323   |
| 7 | 131291714 | 131388688 | 96.974  |
| 7 | 131702526 | 131806909 | 104.383 |
| 7 | 131839918 | 131841480 | 1.562   |
| 7 | 131841800 | 131848202 | 6.402   |
| 7 | 131939649 | 132040073 | 100.424 |
| 7 | 132085300 | 132148606 | 63.306  |
| 7 | 132153686 | 132166549 | 12.863  |
| 7 | 132196201 | 132227782 | 31.581  |
| 7 | 132233012 | 132234803 | 1.791   |
| 7 | 132234808 | 132240773 | 5.965   |
| 7 | 132246505 | 132293646 | 47.141  |
| 7 | 132550426 | 132784753 | 234.327 |
| 7 | 132807677 | 132826856 | 19.179  |
| 7 | 132848502 | 132848514 | 0.012   |
| 7 | 132861856 | 133071500 | 209.644 |
| 7 | 133099613 | 133124945 | 25.332  |
| 7 | 133125076 | 133129185 | 4.109   |
| 7 | 133129261 | 133135025 | 5.764   |
| 7 | 133138468 | 133144683 | 6.215   |
| 7 | 133152194 | 133167831 | 15.637  |
| 7 | 133168114 | 133180613 | 12.499  |
| 7 | 133180626 | 133184993 | 4.367   |
| 7 | 133185024 | 133199621 | 14.597  |
| 7 | 133206342 | 133207237 | 0.895   |
| 7 | 133208655 | 133221144 | 12.489  |
| 7 | 133237355 | 133237376 | 0.021   |
| 7 | 133245793 | 133248490 | 2.697   |
| 7 | 133248524 | 133258476 | 9.952   |
| 7 | 133258922 | 133263301 | 4.379   |
| 7 | 133263492 | 133310801 | 47.309  |
| 7 | 133428503 | 133759434 | 330.931 |
| 7 | 133927379 | 133931003 | 3.624   |
| 7 | 133931027 | 133933194 | 2.167   |
| 7 | 133935404 | 134100749 | 165.345 |
| 7 | 134157226 | 134169150 | 11.924  |
| 7 | 134169331 | 134198015 | 28.684  |
| 7 | 134223668 | 134223889 | 0.221   |
| 7 | 134312084 | 134672293 | 360.209 |
| 7 | 134756773 | 134766898 | 10.125  |
| 7 | 135159788 | 135159829 | 0.041   |
| 7 | 135288495 | 135559499 | 271.004 |
| 7 | 135567532 | 135639669 | 72.137  |
| 7 | 135659590 | 135690488 | 30.898  |
| 7 | 135690543 | 135748276 | 57.733  |
| 7 | 135824526 | 135824537 | 0.011   |
| 7 | 135838328 | 135850039 | 11.711  |
| 7 | 135897669 | 136039826 | 142.157 |
| 7 | 136146754 | 136146786 | 0.032   |
| 7 | 136149072 | 136149079 | 0.007   |
| 7 | 136153043 | 136162097 | 9.054   |
| 7 | 136162898 | 136244340 | 81.442  |
| 7 | 136260705 | 136268918 | 8.213   |
| 8 | 12158     | 190740    | 178.582 |
| 8 | 192550    | 202294    | 9.744   |
| 8 | 230335    | 241984    | 11.649  |
| 8 | 256052    | 412912    | 156.86  |
| 8 | 595817    | 651653    | 55.836  |
| 8 | 681517    | 738000    | 56.483  |
| 8 | 738231    | 798873    | 60.642  |
| 8 | 813944    | 853386    | 39.442  |

|   |         |         |         |
|---|---------|---------|---------|
| 8 | 858717  | 864205  | 5.488   |
| 8 | 869779  | 972775  | 102.996 |
| 8 | 972922  | 1048721 | 75.799  |
| 8 | 1081484 | 1354208 | 272.724 |
| 8 | 1371161 | 1386028 | 14.867  |
| 8 | 1421206 | 1422644 | 1.438   |
| 8 | 1484101 | 1524287 | 40.186  |
| 8 | 1544230 | 1550779 | 6.549   |
| 8 | 1584668 | 1586041 | 1.373   |
| 8 | 1596107 | 1601915 | 5.808   |
| 8 | 1607319 | 1661552 | 54.233  |
| 8 | 1673523 | 1674349 | 0.826   |
| 8 | 1687877 | 1690341 | 2.464   |
| 8 | 1694639 | 1723584 | 28.945  |
| 8 | 1728333 | 1740528 | 12.195  |
| 8 | 1742339 | 1743944 | 1.605   |
| 8 | 1743986 | 1744689 | 0.703   |
| 8 | 1763117 | 1827067 | 63.95   |
| 8 | 1828967 | 1905079 | 76.112  |
| 8 | 1916989 | 1930718 | 13.729  |
| 8 | 1995655 | 2107258 | 111.603 |
| 8 | 2107260 | 2107389 | 0.129   |
| 8 | 2161273 | 2161297 | 0.024   |
| 8 | 2215582 | 2215956 | 0.374   |
| 8 | 2281191 | 2281957 | 0.766   |
| 8 | 2344582 | 2401677 | 57.095  |
| 8 | 2401860 | 2411552 | 9.692   |
| 8 | 2414176 | 2431808 | 17.632  |
| 8 | 2438214 | 2530719 | 92.505  |
| 8 | 2542260 | 2563084 | 20.824  |
| 8 | 2610894 | 2674248 | 63.354  |
| 8 | 2685162 | 2746582 | 61.42   |
| 8 | 2756811 | 2756991 | 0.18    |
| 8 | 2757045 | 2788912 | 31.867  |
| 8 | 2794666 | 2797967 | 3.301   |
| 8 | 2798117 | 2800814 | 2.697   |
| 8 | 2811479 | 2815622 | 4.143   |
| 8 | 2828199 | 2830564 | 2.365   |
| 8 | 2891563 | 2968276 | 76.713  |
| 8 | 2968283 | 3007038 | 38.755  |
| 8 | 3036872 | 3084006 | 47.134  |
| 8 | 3169312 | 3233851 | 64.539  |
| 8 | 3258514 | 3294929 | 36.415  |
| 8 | 3320266 | 3320322 | 0.056   |
| 8 | 3339152 | 3365824 | 26.672  |
| 8 | 3367863 | 3368034 | 0.171   |
| 8 | 3384452 | 3419791 | 35.339  |
| 8 | 3424689 | 3424868 | 0.179   |
| 8 | 3444004 | 3455183 | 11.179  |
| 8 | 3464725 | 3464735 | 0.01    |
| 8 | 3480136 | 3501920 | 21.784  |
| 8 | 3504250 | 3515378 | 11.128  |
| 8 | 3529413 | 3551803 | 22.39   |
| 8 | 3579740 | 3580955 | 1.215   |
| 8 | 3580981 | 3694848 | 113.867 |
| 8 | 3694958 | 3711201 | 16.243  |
| 8 | 3721696 | 3725813 | 4.117   |
| 8 | 3818910 | 3978657 | 159.747 |
| 8 | 3981709 | 4196335 | 214.626 |
| 8 | 4198889 | 4211889 | 13      |
| 8 | 4307719 | 4363830 | 56.111  |

|   |          |          |          |
|---|----------|----------|----------|
| 8 | 4498601  | 4519156  | 20.555   |
| 8 | 4564158  | 4564327  | 0.169    |
| 8 | 4649876  | 4743781  | 93.905   |
| 8 | 4747799  | 4747831  | 0.032    |
| 8 | 4773587  | 4841421  | 67.834   |
| 8 | 5171435  | 5171458  | 0.023    |
| 8 | 5179273  | 5750896  | 571.623  |
| 8 | 5751107  | 5885553  | 134.446  |
| 8 | 5888704  | 6035760  | 147.056  |
| 8 | 6035777  | 6149418  | 113.641  |
| 8 | 6150463  | 6348560  | 198.097  |
| 8 | 6371575  | 6474599  | 103.024  |
| 8 | 6579918  | 6704950  | 125.032  |
| 8 | 6708869  | 6729453  | 20.584   |
| 8 | 7011460  | 7033623  | 22.163   |
| 8 | 7057487  | 7296153  | 238.666  |
| 8 | 7296161  | 7582512  | 286.351  |
| 8 | 7647509  | 7723938  | 76.429   |
| 8 | 7917175  | 8222923  | 305.748  |
| 8 | 8243076  | 8325614  | 82.538   |
| 8 | 8328934  | 8401704  | 72.77    |
| 8 | 8405372  | 8441273  | 35.901   |
| 8 | 8441275  | 8593168  | 151.893  |
| 8 | 8597621  | 8627368  | 29.747   |
| 8 | 8683361  | 8684415  | 1.054    |
| 8 | 8749272  | 8899151  | 149.879  |
| 8 | 8921086  | 9011174  | 90.088   |
| 8 | 9183991  | 9326891  | 142.9    |
| 8 | 9349190  | 9456532  | 107.342  |
| 8 | 9500579  | 9560756  | 60.177   |
| 8 | 9596465  | 9604269  | 7.804    |
| 8 | 9663069  | 10083915 | 420.846  |
| 8 | 10085962 | 10086076 | 0.114    |
| 8 | 10436452 | 11424619 | 988.167  |
| 8 | 12074353 | 12647890 | 573.537  |
| 8 | 13013143 | 13286076 | 272.933  |
| 8 | 13314789 | 13529996 | 215.207  |
| 8 | 13537505 | 13548086 | 10.581   |
| 8 | 13918360 | 14178521 | 260.161  |
| 8 | 14268129 | 14454880 | 186.751  |
| 8 | 14750430 | 14910870 | 160.44   |
| 8 | 14934763 | 14958854 | 24.091   |
| 8 | 15041886 | 15057981 | 16.095   |
| 8 | 15062513 | 15402160 | 339.647  |
| 8 | 15419078 | 15749678 | 330.6    |
| 8 | 15749698 | 15763464 | 13.766   |
| 8 | 15853228 | 15931349 | 78.121   |
| 8 | 15937201 | 15945241 | 8.04     |
| 8 | 15962321 | 15989604 | 27.283   |
| 8 | 15989605 | 15996065 | 6.46     |
| 8 | 16005362 | 16014044 | 8.682    |
| 8 | 16135094 | 16608336 | 473.242  |
| 8 | 16609037 | 17037508 | 428.471  |
| 8 | 17125268 | 18356015 | 1230.747 |
| 8 | 18418729 | 21442474 | 3023.745 |
| 8 | 21470144 | 21721357 | 251.213  |
| 8 | 21974400 | 22471291 | 496.891  |
| 8 | 22840165 | 23407487 | 567.322  |
| 8 | 23412759 | 23463851 | 51.092   |
| 8 | 23829024 | 24170410 | 341.386  |
| 8 | 24469643 | 24535305 | 65.662   |

|   |          |          |          |
|---|----------|----------|----------|
| 8 | 24608437 | 24661277 | 52.84    |
| 8 | 24713410 | 24970226 | 256.816  |
| 8 | 25002823 | 25066808 | 63.985   |
| 8 | 25169824 | 25217968 | 48.144   |
| 8 | 25234852 | 25272518 | 37.666   |
| 8 | 25359679 | 25493631 | 133.952  |
| 8 | 25625402 | 25892467 | 267.065  |
| 8 | 26829562 | 26989774 | 160.212  |
| 8 | 27121069 | 27122198 | 1.129    |
| 8 | 27125442 | 27127882 | 2.44     |
| 8 | 27132833 | 27170758 | 37.925   |
| 8 | 27176939 | 27202708 | 25.769   |
| 8 | 27225432 | 27345535 | 120.103  |
| 8 | 27376592 | 27648973 | 272.381  |
| 8 | 27792892 | 27799329 | 6.437    |
| 8 | 27868923 | 28458080 | 589.157  |
| 8 | 28730556 | 29182539 | 451.983  |
| 8 | 30531460 | 31726877 | 1195.417 |
| 8 | 31811950 | 32566276 | 754.326  |
| 8 | 32581341 | 33305172 | 723.831  |
| 8 | 33476608 | 33532362 | 55.754   |
| 8 | 33608547 | 33994638 | 386.091  |
| 8 | 34022132 | 34797224 | 775.092  |
| 8 | 34810389 | 34955080 | 144.691  |
| 8 | 34998191 | 35275833 | 277.642  |
| 8 | 35464232 | 35499722 | 35.49    |
| 8 | 35615176 | 36005861 | 390.685  |
| 8 | 36046888 | 36051446 | 4.558    |
| 8 | 36051465 | 36296380 | 244.915  |
| 8 | 36296387 | 36418619 | 122.232  |
| 8 | 36495676 | 36545165 | 49.489   |
| 8 | 36628695 | 36657385 | 28.69    |
| 8 | 36711216 | 36777917 | 66.701   |
| 8 | 36806890 | 38103519 | 1296.629 |
| 8 | 38103913 | 38103929 | 0.016    |
| 8 | 38334829 | 38581631 | 246.802  |
| 8 | 38887349 | 39927676 | 1040.327 |
| 8 | 43309007 | 44608991 | 1299.984 |
| 8 | 44614397 | 46017355 | 1402.958 |
| 8 | 46120910 | 46203750 | 82.84    |
| 8 | 46203903 | 46567357 | 363.454  |
| 8 | 46656799 | 46672089 | 15.29    |
| 8 | 46686765 | 47280936 | 594.171  |
| 8 | 47584858 | 47904393 | 319.535  |
| 8 | 47904400 | 47904405 | 0.005    |
| 8 | 47905325 | 47905341 | 0.016    |
| 8 | 47905344 | 47906278 | 0.934    |
| 8 | 47906281 | 47906296 | 0.015    |
| 8 | 47907009 | 47907020 | 0.011    |
| 8 | 47907450 | 47907457 | 0.007    |
| 8 | 47908761 | 47910103 | 1.342    |
| 8 | 47910109 | 47911057 | 0.948    |
| 8 | 48043362 | 48044044 | 0.682    |
| 8 | 48044622 | 48044714 | 0.092    |
| 8 | 48044745 | 48044794 | 0.049    |
| 8 | 48044821 | 48044852 | 0.031    |
| 8 | 48044859 | 48044887 | 0.028    |
| 8 | 48044934 | 48044946 | 0.012    |
| 8 | 48045101 | 48045105 | 0.004    |
| 8 | 48045143 | 48045169 | 0.026    |
| 8 | 48045201 | 48045254 | 0.053    |

|   |          |          |          |
|---|----------|----------|----------|
| 8 | 48045309 | 48045397 | 0.088    |
| 8 | 48045567 | 48045571 | 0.004    |
| 8 | 48045691 | 48045709 | 0.018    |
| 8 | 48045795 | 48045818 | 0.023    |
| 8 | 48045843 | 48045914 | 0.071    |
| 8 | 48046003 | 48046047 | 0.044    |
| 8 | 48046168 | 48046177 | 0.009    |
| 8 | 48046220 | 48046270 | 0.05     |
| 8 | 48046452 | 48046461 | 0.009    |
| 8 | 48046473 | 48046487 | 0.014    |
| 8 | 48047045 | 48047081 | 0.036    |
| 8 | 48047456 | 48047465 | 0.009    |
| 8 | 48047477 | 48047505 | 0.028    |
| 8 | 48047730 | 48047809 | 0.079    |
| 8 | 48047812 | 48047828 | 0.016    |
| 8 | 48047981 | 48048048 | 0.067    |
| 8 | 48048323 | 48048328 | 0.005    |
| 8 | 48048336 | 48048511 | 0.175    |
| 8 | 48048519 | 48048586 | 0.067    |
| 8 | 48048842 | 48048846 | 0.004    |
| 8 | 48048849 | 48048874 | 0.025    |
| 8 | 48049048 | 48049061 | 0.013    |
| 8 | 48049191 | 48049222 | 0.031    |
| 8 | 48049237 | 48049287 | 0.05     |
| 8 | 48049474 | 48049478 | 0.004    |
| 8 | 48049534 | 48049596 | 0.062    |
| 8 | 48049952 | 48049983 | 0.031    |
| 8 | 48049988 | 48050011 | 0.023    |
| 8 | 48050089 | 48050101 | 0.012    |
| 8 | 48050167 | 48050173 | 0.006    |
| 8 | 48050235 | 48050251 | 0.016    |
| 8 | 48052292 | 48052694 | 0.402    |
| 8 | 48052712 | 48065446 | 12.734   |
| 8 | 48067183 | 48067956 | 0.773    |
| 8 | 48067976 | 48068004 | 0.028    |
| 8 | 48200517 | 49703739 | 1503.222 |
| 8 | 50006524 | 50019474 | 12.95    |
| 8 | 50035093 | 51688398 | 1653.305 |
| 8 | 52613618 | 54147208 | 1533.59  |
| 8 | 54551360 | 56070351 | 1518.991 |
| 8 | 56086646 | 56120928 | 34.282   |
| 8 | 56179361 | 56770978 | 591.617  |
| 8 | 56986493 | 56986515 | 0.022    |
| 8 | 56987868 | 57168669 | 180.801  |
| 8 | 57177364 | 57177791 | 0.427    |
| 8 | 57398520 | 59006066 | 1607.546 |
| 8 | 60611901 | 61278814 | 666.913  |
| 8 | 61573311 | 61591467 | 18.156   |
| 8 | 61624759 | 62297610 | 672.851  |
| 8 | 62325564 | 62372311 | 46.747   |
| 8 | 62595325 | 62595469 | 0.144    |
| 8 | 62595488 | 63164322 | 568.834  |
| 8 | 63228444 | 63231836 | 3.392    |
| 8 | 63244614 | 63246912 | 2.298    |
| 8 | 63273008 | 63338516 | 65.508   |
| 8 | 63551446 | 63551475 | 0.029    |
| 8 | 63551752 | 63551919 | 0.167    |
| 8 | 63553399 | 63554534 | 1.135    |
| 8 | 63554692 | 63554817 | 0.125    |
| 8 | 63554824 | 63622025 | 67.201   |
| 8 | 63671258 | 63671261 | 0.003    |

|   |           |           |          |
|---|-----------|-----------|----------|
| 8 | 63671266  | 63671914  | 0.648    |
| 8 | 63681274  | 63871953  | 190.679  |
| 8 | 63878956  | 64074789  | 195.833  |
| 8 | 64082547  | 64256155  | 173.608  |
| 8 | 64288861  | 64371737  | 82.876   |
| 8 | 64384979  | 64620301  | 235.322  |
| 8 | 64742537  | 65112588  | 370.051  |
| 8 | 65156198  | 65473166  | 316.968  |
| 8 | 65516188  | 65821368  | 305.18   |
| 8 | 65876188  | 66176153  | 299.965  |
| 8 | 66176167  | 66227696  | 51.529   |
| 8 | 66227705  | 66239837  | 12.132   |
| 8 | 66333476  | 66348788  | 15.312   |
| 8 | 66365128  | 66375067  | 9.939    |
| 8 | 66380764  | 66381112  | 0.348    |
| 8 | 66381213  | 66381972  | 0.759    |
| 8 | 66414566  | 66432266  | 17.7     |
| 8 | 66484977  | 66546599  | 61.622   |
| 8 | 66575457  | 67998472  | 1423.015 |
| 8 | 68601372  | 69545876  | 944.504  |
| 8 | 69823610  | 70141357  | 317.747  |
| 8 | 70334823  | 70710110  | 375.287  |
| 8 | 70787042  | 71365895  | 578.853  |
| 8 | 71564113  | 71732186  | 168.073  |
| 8 | 71766639  | 71789980  | 23.341   |
| 8 | 72189041  | 72442940  | 253.899  |
| 8 | 72556047  | 72575968  | 19.921   |
| 8 | 72917166  | 72937431  | 20.265   |
| 8 | 73088723  | 73210396  | 121.673  |
| 8 | 73347966  | 73367580  | 19.614   |
| 8 | 73512154  | 73608254  | 96.1     |
| 8 | 73644879  | 73950949  | 306.07   |
| 8 | 74036122  | 74577795  | 541.673  |
| 8 | 74648602  | 74650879  | 2.277    |
| 8 | 74670510  | 74868524  | 198.014  |
| 8 | 74930086  | 75156386  | 226.3    |
| 8 | 75201485  | 76163470  | 961.985  |
| 8 | 77226645  | 78777588  | 1550.943 |
| 8 | 78905835  | 79201690  | 295.855  |
| 8 | 79270228  | 82337980  | 3067.752 |
| 8 | 84626971  | 85232140  | 605.169  |
| 8 | 85877234  | 86375352  | 498.118  |
| 8 | 86464709  | 87132001  | 667.292  |
| 8 | 87643113  | 87894647  | 251.534  |
| 8 | 88642431  | 89982211  | 1339.78  |
| 8 | 89982217  | 90163127  | 180.91   |
| 8 | 90181096  | 90181643  | 0.547    |
| 8 | 90245684  | 90863293  | 617.609  |
| 8 | 90898146  | 90898174  | 0.028    |
| 8 | 90899344  | 91112995  | 213.651  |
| 8 | 91551811  | 92212600  | 660.789  |
| 8 | 93841945  | 94982303  | 1140.358 |
| 8 | 96346124  | 97409856  | 1063.732 |
| 8 | 97409877  | 97467388  | 57.511   |
| 8 | 97505703  | 97896533  | 390.83   |
| 8 | 97953022  | 98777914  | 824.892  |
| 8 | 98884092  | 99462778  | 578.686  |
| 8 | 101070361 | 101925939 | 855.578  |
| 8 | 102130887 | 102290197 | 159.31   |
| 8 | 102336177 | 103079531 | 743.354  |
| 8 | 103133265 | 103147905 | 14.64    |



|   |           |           |          |
|---|-----------|-----------|----------|
| 8 | 103412039 | 104271044 | 859.005  |
| 8 | 104397961 | 104457690 | 59.729   |
| 8 | 104479278 | 104695238 | 215.96   |
| 8 | 104788862 | 105130048 | 341.186  |
| 8 | 105478816 | 106550803 | 1071.987 |
| 8 | 106550891 | 106646200 | 95.309   |
| 8 | 106737739 | 106889078 | 151.339  |
| 8 | 106943448 | 106980618 | 37.17    |
| 8 | 106980688 | 107075822 | 95.134   |
| 8 | 107120521 | 107149692 | 29.171   |
| 8 | 107872813 | 107885730 | 12.917   |
| 8 | 108096654 | 108106515 | 9.861    |
| 8 | 108190685 | 108554119 | 363.434  |
| 8 | 108744587 | 109463440 | 718.853  |
| 8 | 110160169 | 111033693 | 873.524  |
| 8 | 111154215 | 111722337 | 568.122  |
| 8 | 111732407 | 111789241 | 56.834   |
| 8 | 111810271 | 111815765 | 5.494    |
| 8 | 111934595 | 111974592 | 39.997   |
| 8 | 112006911 | 112009293 | 2.382    |
| 8 | 112081057 | 112218055 | 136.998  |
| 8 | 112222708 | 112366910 | 144.202  |
| 8 | 112366914 | 112463362 | 96.448   |
| 8 | 112469987 | 112470004 | 0.017    |
| 8 | 112479097 | 112479180 | 0.083    |
| 8 | 112479194 | 112853335 | 374.141  |
| 8 | 112914069 | 112914072 | 0.003    |
| 8 | 113171918 | 113310600 | 138.682  |
| 8 | 113310618 | 113310661 | 0.043    |
| 8 | 113335537 | 113366013 | 30.476   |
| 8 | 113376650 | 113664459 | 287.809  |
| 8 | 114141255 | 114141405 | 0.15     |
| 8 | 114179196 | 114428293 | 249.097  |
| 8 | 114446062 | 114517447 | 71.385   |
| 8 | 114731074 | 114731088 | 0.014    |
| 8 | 114781352 | 114839366 | 58.014   |
| 8 | 114931463 | 115411736 | 480.273  |
| 8 | 115466234 | 115651462 | 185.228  |
| 8 | 115879759 | 116195694 | 315.935  |
| 8 | 116299993 | 116382530 | 82.537   |
| 8 | 116614510 | 116727808 | 113.298  |
| 8 | 116794275 | 116799961 | 5.686    |
| 8 | 117018381 | 117271173 | 252.792  |
| 8 | 117292645 | 117344814 | 52.169   |
| 8 | 117371797 | 117390132 | 18.335   |
| 8 | 117518640 | 117530635 | 11.995   |
| 8 | 117754811 | 117755001 | 0.19     |
| 8 | 117804459 | 117887654 | 83.195   |
| 8 | 117913213 | 117948678 | 35.465   |
| 8 | 118533291 | 118533306 | 0.015    |
| 8 | 118608520 | 118639041 | 30.521   |
| 8 | 118870627 | 119899558 | 1028.931 |
| 9 | 5156      | 50316     | 45.16    |
| 9 | 68512     | 69986     | 1.474    |
| 9 | 107349    | 115124    | 7.775    |
| 9 | 120577    | 127867    | 7.29     |
| 9 | 133623    | 275399    | 141.776  |
| 9 | 335289    | 377620    | 42.331   |
| 9 | 424205    | 514083    | 89.878   |
| 9 | 514117    | 532366    | 18.249   |
| 9 | 592620    | 799496    | 206.876  |

|   |         |         |         |
|---|---------|---------|---------|
| 9 | 860453  | 924719  | 64.266  |
| 9 | 924720  | 989465  | 64.745  |
| 9 | 999716  | 1095325 | 95.609  |
| 9 | 1095360 | 1129195 | 33.835  |
| 9 | 1129210 | 1195283 | 66.073  |
| 9 | 1211668 | 1211752 | 0.084   |
| 9 | 1312815 | 1328932 | 16.117  |
| 9 | 1329140 | 1330582 | 1.442   |
| 9 | 1333733 | 1350533 | 16.8    |
| 9 | 1350535 | 1360943 | 10.408  |
| 9 | 1368262 | 1391158 | 22.896  |
| 9 | 1412630 | 1435353 | 22.723  |
| 9 | 1456480 | 1479023 | 22.543  |
| 9 | 1498698 | 1614509 | 115.811 |
| 9 | 1637111 | 1937570 | 300.459 |
| 9 | 2064287 | 2064330 | 0.043   |
| 9 | 2122681 | 2222452 | 99.771  |
| 9 | 2223331 | 2577505 | 354.174 |
| 9 | 2599368 | 2610897 | 11.529  |
| 9 | 2626368 | 2827625 | 201.257 |
| 9 | 2844077 | 2844109 | 0.032   |
| 9 | 2844261 | 2902012 | 57.751  |
| 9 | 2917363 | 2961204 | 43.841  |
| 9 | 3079918 | 3109231 | 29.313  |
| 9 | 3237814 | 3263633 | 25.819  |
| 9 | 3285119 | 3448216 | 163.097 |
| 9 | 3457782 | 3462873 | 5.091   |
| 9 | 3688224 | 3739505 | 51.281  |
| 9 | 3750583 | 3763426 | 12.843  |
| 9 | 3763616 | 3764578 | 0.962   |
| 9 | 3766675 | 3830828 | 64.153  |
| 9 | 3897749 | 3897767 | 0.018   |
| 9 | 3899989 | 3900079 | 0.09    |
| 9 | 3900084 | 3919118 | 19.034  |
| 9 | 3920650 | 3920758 | 0.108   |
| 9 | 3927497 | 3978728 | 51.231  |
| 9 | 4282400 | 4282454 | 0.054   |
| 9 | 4455642 | 4465541 | 9.899   |
| 9 | 4465955 | 4587552 | 121.597 |
| 9 | 4664724 | 4753691 | 88.967  |
| 9 | 4753708 | 4754232 | 0.524   |
| 9 | 4764153 | 5189248 | 425.095 |
| 9 | 5209953 | 5224121 | 14.168  |
| 9 | 5236260 | 5236271 | 0.011   |
| 9 | 5288363 | 5300468 | 12.105  |
| 9 | 5303189 | 5308125 | 4.936   |
| 9 | 5310590 | 5319320 | 8.73    |
| 9 | 5346974 | 5419461 | 72.487  |
| 9 | 5459393 | 5506790 | 47.397  |
| 9 | 5529905 | 5568742 | 38.837  |
| 9 | 5655492 | 5950709 | 295.217 |
| 9 | 6110547 | 6319562 | 209.015 |
| 9 | 6324272 | 6325775 | 1.503   |
| 9 | 6328502 | 6342356 | 13.854  |
| 9 | 6386909 | 6787304 | 400.395 |
| 9 | 6816396 | 6827150 | 10.754  |
| 9 | 6834209 | 6836672 | 2.463   |
| 9 | 6845328 | 6896588 | 51.26   |
| 9 | 6898247 | 6948852 | 50.605  |
| 9 | 6968622 | 7254653 | 286.031 |
| 9 | 7254678 | 7400083 | 145.405 |

|   |          |          |         |
|---|----------|----------|---------|
| 9 | 7411972  | 7415989  | 4.017   |
| 9 | 7457269  | 7588288  | 131.019 |
| 9 | 7634010  | 7730492  | 96.482  |
| 9 | 7757499  | 7780316  | 22.817  |
| 9 | 7898634  | 8012539  | 113.905 |
| 9 | 8043383  | 8068110  | 24.727  |
| 9 | 8127513  | 8416556  | 289.043 |
| 9 | 8480852  | 8508219  | 27.367  |
| 9 | 8508227  | 8549932  | 41.705  |
| 9 | 8549937  | 8711840  | 161.903 |
| 9 | 8728245  | 8921325  | 193.08  |
| 9 | 8930433  | 8988075  | 57.642  |
| 9 | 9075684  | 9142185  | 66.501  |
| 9 | 9158792  | 9166844  | 8.052   |
| 9 | 9197535  | 9198717  | 1.182   |
| 9 | 9209725  | 9209739  | 0.014   |
| 9 | 9254129  | 9260975  | 6.846   |
| 9 | 9277967  | 9286099  | 8.132   |
| 9 | 9330894  | 9333120  | 2.226   |
| 9 | 9334938  | 9356348  | 21.41   |
| 9 | 9359405  | 9359869  | 0.464   |
| 9 | 9360031  | 9427179  | 67.148  |
| 9 | 9427184  | 9427200  | 0.016   |
| 9 | 9432223  | 9435441  | 3.218   |
| 9 | 9445122  | 9448964  | 3.842   |
| 9 | 9460827  | 9524165  | 63.338  |
| 9 | 9617188  | 9619424  | 2.236   |
| 9 | 9708834  | 9820864  | 112.03  |
| 9 | 9828331  | 10052916 | 224.585 |
| 9 | 10137633 | 10167692 | 30.059  |
| 9 | 10185259 | 10185459 | 0.2     |
| 9 | 10195795 | 10212911 | 17.116  |
| 9 | 10233294 | 10233708 | 0.414   |
| 9 | 10241199 | 10300847 | 59.648  |
| 9 | 10316574 | 10336296 | 19.722  |
| 9 | 10448756 | 10544516 | 95.76   |
| 9 | 10550224 | 10560479 | 10.255  |
| 9 | 10573391 | 10573398 | 0.007   |
| 9 | 10573538 | 10578202 | 4.664   |
| 9 | 10597943 | 10628883 | 30.94   |
| 9 | 10638298 | 10638462 | 0.164   |
| 9 | 10640178 | 10640223 | 0.045   |
| 9 | 10718583 | 10722385 | 3.802   |
| 9 | 10724758 | 10737288 | 12.53   |
| 9 | 10744302 | 10752205 | 7.903   |
| 9 | 10758213 | 10772971 | 14.758  |
| 9 | 11055326 | 11055363 | 0.037   |
| 9 | 11077461 | 11077469 | 0.008   |
| 9 | 11095424 | 11095576 | 0.152   |
| 9 | 11097687 | 11097701 | 0.014   |
| 9 | 11097953 | 11098164 | 0.211   |
| 9 | 11100679 | 11103315 | 2.636   |
| 9 | 11120076 | 11136889 | 16.813  |
| 9 | 11137477 | 11149371 | 11.894  |
| 9 | 11168565 | 11172318 | 3.753   |
| 9 | 11185085 | 11187127 | 2.042   |
| 9 | 11383183 | 11392997 | 9.814   |
| 9 | 11449284 | 11760977 | 311.693 |
| 9 | 11850368 | 11871755 | 21.387  |
| 9 | 12195775 | 12369459 | 173.684 |
| 9 | 12390817 | 12447735 | 56.918  |

|   |          |          |          |
|---|----------|----------|----------|
| 9 | 12470755 | 12470910 | 0.155    |
| 9 | 12553218 | 12553234 | 0.016    |
| 9 | 12682978 | 13005227 | 322.249  |
| 9 | 13005570 | 13007500 | 1.93     |
| 9 | 13033369 | 13036691 | 3.322    |
| 9 | 13060304 | 13069960 | 9.656    |
| 9 | 13106838 | 13215875 | 109.037  |
| 9 | 13226114 | 13229953 | 3.839    |
| 9 | 13235726 | 13235893 | 0.167    |
| 9 | 13239211 | 13242351 | 3.14     |
| 9 | 13244744 | 13351781 | 107.037  |
| 9 | 13367295 | 13385231 | 17.936   |
| 9 | 13578528 | 13620248 | 41.72    |
| 9 | 13685547 | 13719957 | 34.41    |
| 9 | 13720113 | 13821950 | 101.837  |
| 9 | 13846983 | 13908912 | 61.929   |
| 9 | 13934282 | 14030509 | 96.227   |
| 9 | 14042575 | 14083195 | 40.62    |
| 9 | 14083294 | 14134359 | 51.065   |
| 9 | 14176985 | 14235876 | 58.891   |
| 9 | 14409817 | 14546734 | 136.917  |
| 9 | 14547402 | 15226030 | 678.628  |
| 9 | 15226036 | 15226048 | 0.012    |
| 9 | 15226146 | 15226166 | 0.02     |
| 9 | 15226229 | 15226253 | 0.024    |
| 9 | 15226265 | 15226279 | 0.014    |
| 9 | 15606417 | 15939164 | 332.747  |
| 9 | 16021984 | 16044067 | 22.083   |
| 9 | 16174994 | 16324179 | 149.185  |
| 9 | 17968036 | 18013929 | 45.893   |
| 9 | 18022047 | 18092815 | 70.768   |
| 9 | 18601978 | 18678729 | 76.751   |
| 9 | 18993511 | 19482963 | 489.452  |
| 9 | 19612726 | 19612746 | 0.02     |
| 9 | 20021736 | 20102027 | 80.291   |
| 9 | 20217886 | 20217891 | 0.005    |
| 9 | 20269641 | 20323161 | 53.52    |
| 9 | 20371109 | 20602852 | 231.743  |
| 9 | 20602853 | 20603052 | 0.199    |
| 9 | 20621926 | 20621954 | 0.028    |
| 9 | 20698427 | 20721823 | 23.396   |
| 9 | 20752774 | 20887894 | 135.12   |
| 9 | 20983927 | 21217158 | 233.231  |
| 9 | 21243029 | 21347708 | 104.679  |
| 9 | 21458592 | 21558877 | 100.285  |
| 9 | 21727835 | 22008197 | 280.362  |
| 9 | 22072484 | 22116630 | 44.146   |
| 9 | 22173384 | 22173406 | 0.022    |
| 9 | 22961918 | 22962209 | 0.291    |
| 9 | 23511363 | 24890271 | 1378.908 |
| 9 | 25004075 | 25157966 | 153.891  |
| 9 | 25226927 | 25315820 | 88.893   |
| 9 | 25315917 | 25358053 | 42.136   |
| 9 | 25364341 | 25365124 | 0.783    |
| 9 | 25365170 | 25517527 | 152.357  |
| 9 | 25599682 | 25634568 | 34.886   |
| 9 | 25646032 | 25818740 | 172.708  |
| 9 | 25818751 | 26149350 | 330.599  |
| 9 | 26314477 | 26378886 | 64.409   |
| 9 | 26518136 | 26606146 | 88.01    |
| 9 | 26612628 | 26705423 | 92.795   |

|   |          |          |          |
|---|----------|----------|----------|
| 9 | 26752710 | 26890278 | 137.568  |
| 9 | 26890636 | 26890650 | 0.014    |
| 9 | 27098557 | 27127976 | 29.419   |
| 9 | 27147131 | 27156134 | 9.003    |
| 9 | 27160940 | 27163045 | 2.105    |
| 9 | 27163054 | 27171120 | 8.066    |
| 9 | 27182638 | 27345041 | 162.403  |
| 9 | 27432533 | 27602932 | 170.399  |
| 9 | 27758489 | 27765133 | 6.644    |
| 9 | 27765942 | 27770852 | 4.91     |
| 9 | 27834045 | 27956337 | 122.292  |
| 9 | 27958567 | 28113114 | 154.547  |
| 9 | 28203383 | 28396397 | 193.014  |
| 9 | 28617548 | 28643788 | 26.24    |
| 9 | 28752734 | 28835937 | 83.203   |
| 9 | 28851537 | 30435970 | 1584.433 |
| 9 | 31876059 | 32756453 | 880.394  |
| 9 | 32879010 | 32879023 | 0.013    |
| 9 | 33022651 | 33213735 | 191.084  |
| 9 | 33825099 | 35474427 | 1649.328 |
| 9 | 36389153 | 37225400 | 836.247  |
| 9 | 37420756 | 37553031 | 132.275  |
| 9 | 37634111 | 37646190 | 12.079   |
| 9 | 37919953 | 38036233 | 116.28   |
| 9 | 38121335 | 38182803 | 61.468   |
| 9 | 38192948 | 38269811 | 76.863   |
| 9 | 38376215 | 38417087 | 40.872   |
| 9 | 38487032 | 39157219 | 670.187  |
| 9 | 39168875 | 39173231 | 4.356    |
| 9 | 39229673 | 39247555 | 17.882   |
| 9 | 39250042 | 39251306 | 1.264    |
| 9 | 39310598 | 39417580 | 106.982  |
| 9 | 39466193 | 39534438 | 68.245   |
| 9 | 39579833 | 39579870 | 0.037    |
| 9 | 39730138 | 39875312 | 145.174  |
| 9 | 39875321 | 39927813 | 52.492   |
| 9 | 39962443 | 40034527 | 72.084   |
| 9 | 40039497 | 40045239 | 5.742    |
| 9 | 40046984 | 40119915 | 72.931   |
| 9 | 40189621 | 40286365 | 96.744   |
| 9 | 40296938 | 40564792 | 267.854  |
| 9 | 40565295 | 40633670 | 68.375   |
| 9 | 40638892 | 40638960 | 0.068    |
| 9 | 40651302 | 40691827 | 40.525   |
| 9 | 40691832 | 40781991 | 90.159   |
| 9 | 40793693 | 41170478 | 376.785  |
| 9 | 41183126 | 41257208 | 74.082   |
| 9 | 41288000 | 41293227 | 5.227    |
| 9 | 41307815 | 41607659 | 299.844  |
| 9 | 41719712 | 41719742 | 0.03     |
| 9 | 41862626 | 41870879 | 8.253    |
| 9 | 41874978 | 41903196 | 28.218   |
| 9 | 41934379 | 41934390 | 0.011    |
| 9 | 41937825 | 41947558 | 9.733    |
| 9 | 41951313 | 41969216 | 17.903   |
| 9 | 41986673 | 42014787 | 28.114   |
| 9 | 42061825 | 42117601 | 55.776   |
| 9 | 42151706 | 42259877 | 108.171  |
| 9 | 42418473 | 42487352 | 68.879   |
| 9 | 42655725 | 42664851 | 9.126    |
| 9 | 42715162 | 42739539 | 24.377   |

|   |          |          |         |
|---|----------|----------|---------|
| 9 | 42761045 | 42767764 | 6.719   |
| 9 | 42804236 | 42833921 | 29.685  |
| 9 | 42838207 | 42838433 | 0.226   |
| 9 | 42848775 | 42855289 | 6.514   |
| 9 | 42882887 | 42883007 | 0.12    |
| 9 | 42918553 | 42919456 | 0.903   |
| 9 | 43006897 | 43007421 | 0.524   |
| 9 | 43007428 | 43008544 | 1.116   |
| 9 | 43134418 | 43291918 | 157.5   |
| 9 | 43313547 | 43542445 | 228.898 |
| 9 | 43577282 | 43702846 | 125.564 |
| 9 | 43702963 | 43756525 | 53.562  |
| 9 | 43796853 | 43848163 | 51.31   |
| 9 | 43951088 | 43956131 | 5.043   |
| 9 | 43960315 | 43961155 | 0.84    |
| 9 | 44059512 | 44278887 | 219.375 |
| 9 | 44311897 | 44351631 | 39.734  |
| 9 | 44390703 | 44765657 | 374.954 |
| 9 | 44765672 | 44984070 | 218.398 |
| 9 | 45005011 | 45243856 | 238.845 |
| 9 | 45258191 | 45427124 | 168.933 |
| 9 | 45427127 | 45535249 | 108.122 |
| 9 | 45559575 | 45559613 | 0.038   |
| 9 | 45583765 | 45606973 | 23.208  |
| 9 | 45617360 | 45648133 | 30.773  |
| 9 | 45672469 | 45672634 | 0.165   |
| 9 | 45712498 | 45837493 | 124.995 |
| 9 | 45868950 | 45980742 | 111.792 |
| 9 | 45983865 | 45983933 | 0.068   |
| 9 | 45985436 | 45995540 | 10.104  |
| 9 | 45995703 | 46263144 | 267.441 |
| 9 | 46338634 | 46356983 | 18.349  |
| 9 | 46357135 | 46465254 | 108.119 |
| 9 | 46597136 | 46726799 | 129.663 |
| 9 | 46726816 | 46732835 | 6.019   |
| 9 | 46746842 | 47066387 | 319.545 |
| 9 | 47067470 | 47168091 | 100.621 |
| 9 | 47188133 | 47236931 | 48.798  |
| 9 | 47381417 | 47592927 | 211.51  |
| 9 | 48061236 | 48071123 | 9.887   |
| 9 | 48171925 | 48266541 | 94.616  |
| 9 | 48284515 | 48286051 | 1.536   |
| 9 | 48344759 | 48553932 | 209.173 |
| 9 | 48568868 | 48597209 | 28.341  |
| 9 | 48634249 | 48923976 | 289.727 |
| 9 | 48945990 | 48960327 | 14.337  |
| 9 | 48960356 | 48994060 | 33.704  |
| 9 | 49026218 | 49026805 | 0.587   |
| 9 | 49027617 | 49801117 | 773.5   |
| 9 | 49930826 | 49930881 | 0.055   |
| 9 | 49941143 | 50191419 | 250.276 |
| 9 | 50218099 | 50427311 | 209.212 |
| 9 | 50451589 | 50529192 | 77.603  |
| 9 | 50553082 | 50941085 | 388.003 |
| 9 | 51022405 | 51277129 | 254.724 |
| 9 | 51725306 | 52030191 | 304.885 |
| 9 | 52127960 | 52168316 | 40.356  |
| 9 | 52209873 | 52604195 | 394.322 |
| 9 | 52767311 | 52954156 | 186.845 |
| 9 | 53350131 | 53783135 | 433.004 |
| 9 | 53958766 | 54153817 | 195.051 |

|   |          |          |         |
|---|----------|----------|---------|
| 9 | 54175378 | 54265428 | 90.05   |
| 9 | 54287856 | 54305434 | 17.578  |
| 9 | 54664735 | 54808044 | 143.309 |
| 9 | 54864318 | 54889962 | 25.644  |
| 9 | 54903999 | 54955918 | 51.919  |
| 9 | 54992134 | 54992165 | 0.031   |
| 9 | 55074327 | 55529725 | 455.398 |
| 9 | 55553309 | 55559987 | 6.678   |
| 9 | 55580480 | 55656866 | 76.386  |
| 9 | 55719451 | 55847664 | 128.213 |
| 9 | 55936515 | 56144350 | 207.835 |
| 9 | 56164258 | 56177851 | 13.593  |
| 9 | 56230898 | 56255170 | 24.272  |
| 9 | 56383189 | 56410530 | 27.341  |
| 9 | 56468676 | 56526359 | 57.683  |
| 9 | 56556428 | 56566220 | 9.792   |
| 9 | 56578114 | 56639086 | 60.972  |
| 9 | 56643863 | 56801508 | 157.645 |
| 9 | 56869539 | 57122277 | 252.738 |
| 9 | 57139084 | 57173998 | 34.914  |
| 9 | 57230656 | 57379772 | 149.116 |
| 9 | 57616732 | 57636662 | 19.93   |
| 9 | 57807771 | 58024106 | 216.335 |
| 9 | 58025184 | 58080251 | 55.067  |
| 9 | 58225483 | 58531112 | 305.629 |
| 9 | 58564616 | 58564634 | 0.018   |
| 9 | 58682432 | 58725773 | 43.341  |
| 9 | 58777478 | 58918186 | 140.708 |
| 9 | 58951698 | 58993792 | 42.094  |
| 9 | 59005983 | 59265427 | 259.444 |
| 9 | 59268491 | 59285691 | 17.2    |
| 9 | 59290878 | 59302351 | 11.473  |
| 9 | 59319861 | 59351694 | 31.833  |
| 9 | 59371593 | 59383119 | 11.526  |
| 9 | 59387717 | 59407017 | 19.3    |
| 9 | 59411504 | 59427880 | 16.376  |
| 9 | 59429720 | 59470027 | 40.307  |
| 9 | 59470597 | 59474437 | 3.84    |
| 9 | 59810674 | 59819947 | 9.273   |
| 9 | 59871600 | 59874325 | 2.725   |
| 9 | 59875864 | 59950129 | 74.265  |
| 9 | 59950133 | 60027984 | 77.851  |
| 9 | 60027998 | 60032446 | 4.448   |
| 9 | 60083347 | 60343381 | 260.034 |
| 9 | 60696452 | 60696506 | 0.054   |
| 9 | 60801218 | 61260703 | 459.485 |
| 9 | 61263051 | 61343549 | 80.498  |
| 9 | 61351447 | 61351462 | 0.015   |
| 9 | 61352382 | 61353772 | 1.39    |
| 9 | 61365896 | 61365903 | 0.007   |
| 9 | 61366021 | 61366293 | 0.272   |
| 9 | 61368620 | 61368637 | 0.017   |
| 9 | 61371355 | 61371386 | 0.031   |
| 9 | 61371632 | 61379112 | 7.48    |
| 9 | 61391125 | 61391165 | 0.04    |
| 9 | 61421744 | 61421763 | 0.019   |
| 9 | 61431662 | 61432599 | 0.937   |
| 9 | 61433877 | 61437449 | 3.572   |
| 9 | 61437451 | 61437490 | 0.039   |
| 9 | 61437516 | 61437525 | 0.009   |
| 9 | 61440011 | 61765145 | 325.134 |

|   |           |           |          |
|---|-----------|-----------|----------|
| 9 | 61778059  | 61781793  | 3.734    |
| 9 | 61784823  | 61869430  | 84.607   |
| 9 | 61913128  | 61934201  | 21.073   |
| 9 | 61954609  | 62313591  | 358.982  |
| 9 | 62313602  | 62627290  | 313.688  |
| 9 | 62692312  | 62717626  | 25.314   |
| 9 | 62745792  | 62882470  | 136.678  |
| 9 | 62882472  | 62884679  | 2.207    |
| 9 | 62909370  | 62947289  | 37.919   |
| 9 | 63030629  | 63036630  | 6.001    |
| 9 | 63113419  | 63239520  | 126.101  |
| 9 | 63258937  | 63263108  | 4.171    |
| 9 | 63364352  | 63435697  | 71.345   |
| 9 | 63663494  | 64863049  | 1199.555 |
| 9 | 65515695  | 66333396  | 817.701  |
| 9 | 66613826  | 67615402  | 1001.576 |
| 9 | 67814618  | 68287606  | 472.988  |
| 9 | 68664192  | 69031528  | 367.336  |
| 9 | 69169983  | 71605857  | 2435.874 |
| 9 | 73026801  | 73662587  | 635.786  |
| 9 | 81958170  | 84300337  | 2342.167 |
| 9 | 84311899  | 84697339  | 385.44   |
| 9 | 84839061  | 84871420  | 32.359   |
| 9 | 85033827  | 85314152  | 280.325  |
| 9 | 85388653  | 85606023  | 217.37   |
| 9 | 85617778  | 86247590  | 629.812  |
| 9 | 86501037  | 86509523  | 8.486    |
| 9 | 86526742  | 86590010  | 63.268   |
| 9 | 86654239  | 87799068  | 1144.829 |
| 9 | 88244886  | 92090053  | 3845.167 |
| 9 | 98208766  | 98639237  | 430.471  |
| 9 | 98649293  | 98672125  | 22.832   |
| 9 | 98745971  | 98811032  | 65.061   |
| 9 | 98831866  | 98964994  | 133.128  |
| 9 | 98973414  | 98978141  | 4.727    |
| 9 | 98979395  | 98994062  | 14.667   |
| 9 | 99052616  | 99068266  | 15.65    |
| 9 | 99093947  | 99319956  | 226.009  |
| 9 | 99321172  | 99321180  | 0.008    |
| 9 | 99321186  | 100194272 | 873.086  |
| 9 | 100456244 | 100456269 | 0.025    |
| 9 | 100510220 | 100560010 | 49.79    |
| 9 | 100560104 | 100634437 | 74.333   |
| 9 | 100657030 | 100716498 | 59.468   |
| 9 | 100742062 | 100806304 | 64.242   |
| 9 | 100841672 | 101107957 | 266.285  |
| 9 | 101816612 | 101860930 | 44.318   |
| 9 | 101866344 | 101906496 | 40.152   |
| 9 | 101918446 | 102282426 | 363.98   |
| 9 | 102433154 | 102438097 | 4.943    |
| 9 | 102492891 | 102653719 | 160.828  |
| 9 | 102847568 | 103896296 | 1048.728 |
| 9 | 104844844 | 106274640 | 1429.796 |
| 9 | 106283915 | 106432527 | 148.612  |
| 9 | 106543797 | 106544019 | 0.222    |
| 9 | 106544043 | 106676142 | 132.099  |
| 9 | 106792437 | 106822078 | 29.641   |
| 9 | 106871854 | 106871892 | 0.038    |
| 9 | 106884932 | 106885244 | 0.312    |
| 9 | 106912747 | 107024597 | 111.85   |
| 9 | 107083016 | 107126225 | 43.209   |



|   |           |           |          |
|---|-----------|-----------|----------|
| 9 | 107126247 | 109292219 | 2165.972 |
| 9 | 109783160 | 110171679 | 388.519  |
| 9 | 110264373 | 110284993 | 20.62    |
| 9 | 110333270 | 110388422 | 55.152   |
| 9 | 110393660 | 110426400 | 32.74    |
| 9 | 110475070 | 110502426 | 27.356   |
| 9 | 110574110 | 110666160 | 92.05    |
| 9 | 110695807 | 111800633 | 1104.826 |
| 9 | 111911471 | 112185440 | 273.969  |
| 9 | 112339148 | 113098443 | 759.295  |
| 9 | 113179442 | 114254798 | 1075.356 |
| 9 | 114255123 | 114316658 | 61.535   |
| 9 | 114344622 | 115077235 | 732.613  |
| 9 | 115078230 | 115167775 | 89.545   |
| 9 | 115189750 | 115444475 | 254.725  |
| 9 | 115497714 | 115563704 | 65.99    |
| 9 | 115563815 | 115603133 | 39.318   |
| 9 | 115614898 | 115965466 | 350.568  |
| 9 | 116002051 | 116015271 | 13.22    |
| 9 | 116067776 | 116126922 | 59.146   |
| 9 | 116313104 | 116401165 | 88.061   |
| 9 | 116610735 | 116747050 | 136.315  |
| 9 | 116747434 | 117129501 | 382.067  |
| 9 | 117254111 | 117501939 | 247.828  |
| 9 | 118146221 | 119005268 | 859.047  |
| 9 | 119020850 | 119449060 | 428.21   |
| 9 | 119451012 | 120236473 | 785.461  |
| 9 | 120343935 | 121192773 | 848.838  |
| 9 | 122240267 | 122623587 | 383.32   |
| 9 | 122623591 | 123076258 | 452.667  |
| 9 | 123076303 | 123232412 | 156.109  |
| 9 | 123255182 | 123444486 | 189.304  |
| 9 | 123585464 | 123847511 | 262.047  |
| 9 | 123991572 | 123991770 | 0.198    |
| 9 | 124063493 | 124063699 | 0.206    |
| 9 | 124069296 | 124495439 | 426.143  |
| 9 | 124534926 | 124598278 | 63.352   |
| 9 | 124614484 | 124644327 | 29.843   |
| 9 | 124644825 | 124719585 | 74.76    |
| 9 | 124724688 | 125069431 | 344.743  |
| 9 | 125525611 | 125543018 | 17.407   |
| 9 | 125561054 | 125570751 | 9.697    |
| 9 | 125570762 | 125703903 | 133.141  |
| 9 | 125736853 | 125757166 | 20.313   |
| 9 | 125823220 | 125830151 | 6.931    |
| 9 | 125859940 | 125859961 | 0.021    |
| 9 | 125870412 | 125910431 | 40.019   |
| 9 | 125916053 | 125960919 | 44.866   |
| 9 | 125970651 | 126013154 | 42.503   |
| 9 | 126048626 | 126654130 | 605.504  |
| 9 | 126771887 | 126838911 | 67.024   |
| 9 | 126851596 | 126901484 | 49.888   |
| 9 | 126923373 | 126948462 | 25.089   |
| 9 | 126948595 | 126948638 | 0.043    |
| 9 | 126957001 | 126993275 | 36.274   |
| 9 | 126996186 | 127022835 | 26.649   |
| 9 | 127025479 | 127050481 | 25.002   |
| 9 | 127080291 | 127160488 | 80.197   |
| 9 | 127191426 | 127207450 | 16.024   |
| 9 | 127254076 | 127337591 | 83.515   |
| 9 | 127339451 | 127430330 | 90.879   |

|    |           |           |         |
|----|-----------|-----------|---------|
| 9  | 127430347 | 127451467 | 21.12   |
| 9  | 127466715 | 127589034 | 122.319 |
| 9  | 127595454 | 127596993 | 1.539   |
| 9  | 127677338 | 127820906 | 143.568 |
| 9  | 127873827 | 127967445 | 93.618  |
| 9  | 127967453 | 128161141 | 193.688 |
| 9  | 128170499 | 128231544 | 61.045  |
| 9  | 128239327 | 128283344 | 44.017  |
| 9  | 128283358 | 128292020 | 8.662   |
| 9  | 128330489 | 128507950 | 177.461 |
| 9  | 128526593 | 128558933 | 32.34   |
| 9  | 128572801 | 128771579 | 198.778 |
| 9  | 128807130 | 128807813 | 0.683   |
| 9  | 128852024 | 128971734 | 119.71  |
| 9  | 128979232 | 129082028 | 102.796 |
| 9  | 129141226 | 129150977 | 9.751   |
| 9  | 129152448 | 129183656 | 31.208  |
| 9  | 129183709 | 129270219 | 86.51   |
| 9  | 129419399 | 129561383 | 141.984 |
| 9  | 129561391 | 129648236 | 86.845  |
| 9  | 129694095 | 129694125 | 0.03    |
| 9  | 129715913 | 129727396 | 11.483  |
| 9  | 129775609 | 129775626 | 0.017   |
| 9  | 129847720 | 129909429 | 61.709  |
| 9  | 130188416 | 130307383 | 118.967 |
| 9  | 130399473 | 130512283 | 112.81  |
| 9  | 130762856 | 130830920 | 68.064  |
| 9  | 130886163 | 131184825 | 298.662 |
| 9  | 131282898 | 131299758 | 16.86   |
| 9  | 131659804 | 131954894 | 295.09  |
| 9  | 131983792 | 132041911 | 58.119  |
| 9  | 132132743 | 132172600 | 39.857  |
| 9  | 132177204 | 132326719 | 149.515 |
| 9  | 132368555 | 132464450 | 95.895  |
| 10 | 18355     | 58557     | 40.202  |
| 10 | 60288     | 239881    | 179.593 |
| 10 | 592468    | 656563    | 64.095  |
| 10 | 721634    | 721824    | 0.19    |
| 10 | 999941    | 1141701   | 141.76  |
| 10 | 1200811   | 1818767   | 617.956 |
| 10 | 1887466   | 2161141   | 273.675 |
| 10 | 2209199   | 2211785   | 2.586   |
| 10 | 2211796   | 2211801   | 0.005   |
| 10 | 2306110   | 2652716   | 346.606 |
| 10 | 3070344   | 3294767   | 224.423 |
| 10 | 3916913   | 3992273   | 75.36   |
| 10 | 4442614   | 4619070   | 176.456 |
| 10 | 4619090   | 4889095   | 270.005 |
| 10 | 5221860   | 5232711   | 10.851  |
| 10 | 5268933   | 5528760   | 259.827 |
| 10 | 5924128   | 5932084   | 7.956   |
| 10 | 6000573   | 6009368   | 8.795   |
| 10 | 6224370   | 6364903   | 140.533 |
| 10 | 6400531   | 6433584   | 33.053  |
| 10 | 6466481   | 6714945   | 248.464 |
| 10 | 6780168   | 6964622   | 184.454 |
| 10 | 6964646   | 7023646   | 59      |
| 10 | 7031509   | 7494930   | 463.421 |
| 10 | 7554227   | 7866292   | 312.065 |
| 10 | 8041038   | 8140593   | 99.555  |
| 10 | 8175463   | 8177692   | 2.229   |

|    |          |          |         |
|----|----------|----------|---------|
| 10 | 8206900  | 8393444  | 186.544 |
| 10 | 8435898  | 8438361  | 2.463   |
| 10 | 8462488  | 8652202  | 189.714 |
| 10 | 8757493  | 8809704  | 52.211  |
| 10 | 8809705  | 9080574  | 270.869 |
| 10 | 9156327  | 9355806  | 199.479 |
| 10 | 9405799  | 9506560  | 100.761 |
| 10 | 9570508  | 9670154  | 99.646  |
| 10 | 9685606  | 10144339 | 458.733 |
| 10 | 10144343 | 10159295 | 14.952  |
| 10 | 10164198 | 10208786 | 44.588  |
| 10 | 10224693 | 10224734 | 0.041   |
| 10 | 10250509 | 10257273 | 6.764   |
| 10 | 10280536 | 10914548 | 634.012 |
| 10 | 10919209 | 10919228 | 0.019   |
| 10 | 10919229 | 10969568 | 50.339  |
| 10 | 11018501 | 11124021 | 105.52  |
| 10 | 11162049 | 11212535 | 50.486  |
| 10 | 11255465 | 11296022 | 40.557  |
| 10 | 11353297 | 11421176 | 67.879  |
| 10 | 11445552 | 11761726 | 316.174 |
| 10 | 11777328 | 11779435 | 2.107   |
| 10 | 11869831 | 12027709 | 157.878 |
| 10 | 12027749 | 12039398 | 11.649  |
| 10 | 12079649 | 12530709 | 451.06  |
| 10 | 12545460 | 13283274 | 737.814 |
| 10 | 13284173 | 13284401 | 0.228   |
| 10 | 13381129 | 13407208 | 26.079  |
| 10 | 13408858 | 13409048 | 0.19    |
| 10 | 13411868 | 13719002 | 307.134 |
| 10 | 13831860 | 13831871 | 0.011   |
| 10 | 13896533 | 13906634 | 10.101  |
| 10 | 13906649 | 13968762 | 62.113  |
| 10 | 13968807 | 13981493 | 12.686  |
| 10 | 13999068 | 14047280 | 48.212  |
| 10 | 14659280 | 14741980 | 82.7    |
| 10 | 14804281 | 14860486 | 56.205  |
| 10 | 15119775 | 15119787 | 0.012   |
| 10 | 15119799 | 15126785 | 6.986   |
| 10 | 15281377 | 15456328 | 174.951 |
| 10 | 15525890 | 15579277 | 53.387  |
| 10 | 15599488 | 15604723 | 5.235   |
| 10 | 15626830 | 15768181 | 141.351 |
| 10 | 15890126 | 15958075 | 67.949  |
| 10 | 16024129 | 16101559 | 77.43   |
| 10 | 16106194 | 16499258 | 393.064 |
| 10 | 16598188 | 16604985 | 6.797   |
| 10 | 16640525 | 16640713 | 0.188   |
| 10 | 16699228 | 16702984 | 3.756   |
| 10 | 16756499 | 16855240 | 98.741  |
| 10 | 16937828 | 16946271 | 8.443   |
| 10 | 16962347 | 17162992 | 200.645 |
| 10 | 17343586 | 17375779 | 32.193  |
| 10 | 17489300 | 17495942 | 6.642   |
| 10 | 17499832 | 17557041 | 57.209  |
| 10 | 17557122 | 17557152 | 0.03    |
| 10 | 17748526 | 17761336 | 12.81   |
| 10 | 17881302 | 18013507 | 132.205 |
| 10 | 18092974 | 18744735 | 651.761 |
| 10 | 18744736 | 18775882 | 31.146  |
| 10 | 18802248 | 18862054 | 59.806  |

|    |          |          |         |
|----|----------|----------|---------|
| 10 | 18865592 | 18865776 | 0.184   |
| 10 | 18867702 | 18917010 | 49.308  |
| 10 | 18936588 | 18995868 | 59.28   |
| 10 | 19014968 | 19024837 | 9.869   |
| 10 | 19211057 | 19216230 | 5.173   |
| 10 | 19232396 | 19232429 | 0.033   |
| 10 | 19232516 | 19232566 | 0.05    |
| 10 | 19232698 | 19232758 | 0.06    |
| 10 | 19234682 | 19236212 | 1.53    |
| 10 | 19395482 | 19395547 | 0.065   |
| 10 | 19409978 | 19416083 | 6.105   |
| 10 | 19416212 | 19416221 | 0.009   |
| 10 | 19459537 | 19638738 | 179.201 |
| 10 | 19672385 | 19672427 | 0.042   |
| 10 | 19687591 | 19975685 | 288.094 |
| 10 | 20016178 | 20096111 | 79.933  |
| 10 | 20172709 | 20172732 | 0.023   |
| 10 | 20202541 | 20212224 | 9.683   |
| 10 | 20350562 | 20350600 | 0.038   |
| 10 | 20361264 | 20361397 | 0.133   |
| 10 | 20385342 | 20385532 | 0.19    |
| 10 | 20395104 | 20533630 | 138.526 |
| 10 | 20603577 | 20804141 | 200.564 |
| 10 | 20818932 | 20963507 | 144.575 |
| 10 | 21171803 | 21402187 | 230.384 |
| 10 | 21485628 | 21714565 | 228.937 |
| 10 | 21888068 | 21987327 | 99.259  |
| 10 | 22010084 | 22117296 | 107.212 |
| 10 | 22161131 | 22276517 | 115.386 |
| 10 | 22340911 | 22405991 | 65.08   |
| 10 | 22598264 | 22599096 | 0.832   |
| 10 | 22759220 | 22771074 | 11.854  |
| 10 | 22857462 | 23696403 | 838.941 |
| 10 | 23696409 | 23858022 | 161.613 |
| 10 | 23858065 | 23858198 | 0.133   |
| 10 | 23863637 | 24016098 | 152.461 |
| 10 | 24038040 | 24038223 | 0.183   |
| 10 | 24057303 | 24079374 | 22.071  |
| 10 | 24079734 | 24079888 | 0.154   |
| 10 | 24080331 | 24083523 | 3.192   |
| 10 | 24090967 | 24095056 | 4.089   |
| 10 | 24104159 | 24166392 | 62.233  |
| 10 | 24186586 | 24186674 | 0.088   |
| 10 | 24196727 | 24275113 | 78.386  |
| 10 | 24306793 | 24331465 | 24.672  |
| 10 | 24355832 | 24357955 | 2.123   |
| 10 | 24358085 | 24378055 | 19.97   |
| 10 | 24380258 | 24385337 | 5.079   |
| 10 | 24387918 | 24402849 | 14.931  |
| 10 | 24402961 | 24402977 | 0.016   |
| 10 | 24403084 | 24403234 | 0.15    |
| 10 | 24408520 | 24408585 | 0.065   |
| 10 | 24450081 | 24469497 | 19.416  |
| 10 | 24470116 | 24474516 | 4.4     |
| 10 | 24480032 | 24484770 | 4.738   |
| 10 | 24487105 | 24693177 | 206.072 |
| 10 | 24694266 | 24697910 | 3.644   |
| 10 | 24727592 | 24750431 | 22.839  |
| 10 | 24804499 | 25014206 | 209.707 |
| 10 | 25139986 | 25249094 | 109.108 |
| 10 | 25301265 | 25416247 | 114.982 |

|    |          |          |         |
|----|----------|----------|---------|
| 10 | 25483877 | 26096856 | 612.979 |
| 10 | 26096908 | 26096918 | 0.01    |
| 10 | 26197521 | 26710943 | 513.422 |
| 10 | 26851150 | 27034206 | 183.056 |
| 10 | 27042854 | 27114422 | 71.568  |
| 10 | 27194949 | 27253008 | 58.059  |
| 10 | 27253122 | 27390365 | 137.243 |
| 10 | 27391291 | 27551401 | 160.11  |
| 10 | 27704859 | 27923263 | 218.404 |
| 10 | 27938572 | 28007496 | 68.924  |
| 10 | 28324385 | 28550075 | 225.69  |
| 10 | 28582701 | 28582710 | 0.009   |
| 10 | 28671921 | 28760998 | 89.077  |
| 10 | 28904028 | 29180344 | 276.316 |
| 10 | 29435108 | 30102854 | 667.746 |
| 10 | 30198368 | 30538984 | 340.616 |
| 10 | 30595869 | 30655436 | 59.567  |
| 10 | 30661617 | 30662030 | 0.413   |
| 10 | 30870593 | 31194501 | 323.908 |
| 10 | 31287995 | 31515566 | 227.571 |
| 10 | 31569319 | 31579563 | 10.244  |
| 10 | 31584099 | 31636290 | 52.191  |
| 10 | 31640160 | 31651003 | 10.843  |
| 10 | 31765506 | 31898768 | 133.262 |
| 10 | 31898773 | 32219115 | 320.342 |
| 10 | 32353207 | 32408997 | 55.79   |
| 10 | 37370638 | 37403364 | 32.726  |
| 10 | 37574580 | 38170243 | 595.663 |
| 10 | 38170254 | 38241910 | 71.656  |
| 10 | 38285566 | 38349423 | 63.857  |
| 10 | 38490176 | 38534853 | 44.677  |
| 10 | 38688200 | 38688241 | 0.041   |
| 10 | 38722315 | 38775978 | 53.663  |
| 10 | 38780514 | 38782995 | 2.481   |
| 10 | 38795551 | 38964792 | 169.241 |
| 10 | 39010804 | 39039541 | 28.737  |
| 10 | 39039544 | 39087701 | 48.157  |
| 10 | 39129282 | 39129319 | 0.037   |
| 10 | 39220363 | 39232631 | 12.268  |
| 10 | 39249202 | 39745618 | 496.416 |
| 10 | 39747478 | 40265402 | 517.924 |
| 10 | 40304058 | 40320810 | 16.752  |
| 10 | 40334109 | 40436065 | 101.956 |
| 10 | 40436118 | 40438985 | 2.867   |
| 10 | 40613675 | 40650673 | 36.998  |
| 10 | 40659549 | 40935894 | 276.345 |
| 10 | 41355314 | 41358400 | 3.086   |
| 10 | 41359424 | 41359438 | 0.014   |
| 10 | 41416648 | 41623759 | 207.111 |
| 10 | 41861699 | 42391979 | 530.28  |
| 10 | 42644440 | 43138843 | 494.403 |
| 10 | 43138849 | 43140409 | 1.56    |
| 10 | 43220136 | 43476192 | 256.056 |
| 10 | 43484797 | 43606681 | 121.884 |
| 10 | 44081595 | 44308763 | 227.168 |
| 10 | 44358233 | 44762787 | 404.554 |
| 10 | 44798033 | 44798218 | 0.185   |
| 10 | 44828460 | 44947791 | 119.331 |
| 10 | 44952716 | 44975827 | 23.111  |
| 10 | 45008886 | 45153078 | 144.192 |
| 10 | 45268746 | 45367660 | 98.914  |

|    |          |          |         |
|----|----------|----------|---------|
| 10 | 45403837 | 45436342 | 32.505  |
| 10 | 45488168 | 45538564 | 50.396  |
| 10 | 45967428 | 45978051 | 10.623  |
| 10 | 46023103 | 46023433 | 0.33    |
| 10 | 46034724 | 46117821 | 83.097  |
| 10 | 46432633 | 46549008 | 116.375 |
| 10 | 46598840 | 46954288 | 355.448 |
| 10 | 47335987 | 47562631 | 226.644 |
| 10 | 47680715 | 47799932 | 119.217 |
| 10 | 47898792 | 47993724 | 94.932  |
| 10 | 47993890 | 48412080 | 418.19  |
| 10 | 48413656 | 48576547 | 162.891 |
| 10 | 48636148 | 48853275 | 217.127 |
| 10 | 48996881 | 49212692 | 215.811 |
| 10 | 49274639 | 49342620 | 67.981  |
| 10 | 49342633 | 49387428 | 44.795  |
| 10 | 49387437 | 49387625 | 0.188   |
| 10 | 49388095 | 49402100 | 14.005  |
| 10 | 49414537 | 49823368 | 408.831 |
| 10 | 49858493 | 50202067 | 343.574 |
| 10 | 50202102 | 50926461 | 724.359 |
| 10 | 50964536 | 51173474 | 208.938 |
| 10 | 51241691 | 51276978 | 35.287  |
| 10 | 51391172 | 51432405 | 41.233  |
| 10 | 51512706 | 51512852 | 0.146   |
| 10 | 51556601 | 51635989 | 79.388  |
| 10 | 51663882 | 51794700 | 130.818 |
| 10 | 51820854 | 52729002 | 908.148 |
| 10 | 53162761 | 53264835 | 102.074 |
| 10 | 53264837 | 53264880 | 0.043   |
| 10 | 53317219 | 53448686 | 131.467 |
| 10 | 53471923 | 53771135 | 299.212 |
| 10 | 53776149 | 53854750 | 78.601  |
| 10 | 53874458 | 53878587 | 4.129   |
| 10 | 53940023 | 54193466 | 253.443 |
| 10 | 54227988 | 54305305 | 77.317  |
| 10 | 54305343 | 54427863 | 122.52  |
| 10 | 54588916 | 54832422 | 243.506 |
| 10 | 54888266 | 54895148 | 6.882   |
| 10 | 54896646 | 54901794 | 5.148   |
| 10 | 54917435 | 54942626 | 25.191  |
| 10 | 54953074 | 54963472 | 10.398  |
| 10 | 55016209 | 55104851 | 88.642  |
| 10 | 55181655 | 55181829 | 0.174   |
| 10 | 55185236 | 55425388 | 240.152 |
| 10 | 55494835 | 55644780 | 149.945 |
| 10 | 55703019 | 55919599 | 216.58  |
| 10 | 56029212 | 56091416 | 62.204  |
| 10 | 56120428 | 56146178 | 25.75   |
| 10 | 56202456 | 56202705 | 0.249   |
| 10 | 56216132 | 56310167 | 94.035  |
| 10 | 56364670 | 56366767 | 2.097   |
| 10 | 56386592 | 56462741 | 76.149  |
| 10 | 56464283 | 56492618 | 28.335  |
| 10 | 56494592 | 56527770 | 33.178  |
| 10 | 56539115 | 56722667 | 183.552 |
| 10 | 56951927 | 57002697 | 50.77   |
| 10 | 57087886 | 57095292 | 7.406   |
| 10 | 57131649 | 57146677 | 15.028  |
| 10 | 57150166 | 57175932 | 25.766  |
| 10 | 57185898 | 57200456 | 14.558  |

|    |          |          |         |
|----|----------|----------|---------|
| 10 | 57373933 | 57373967 | 0.034   |
| 10 | 57374092 | 57377770 | 3.678   |
| 10 | 57377924 | 57396436 | 18.512  |
| 10 | 57578711 | 57763095 | 184.384 |
| 10 | 57777636 | 57795068 | 17.432  |
| 10 | 57796263 | 57797389 | 1.126   |
| 10 | 57822208 | 57834517 | 12.309  |
| 10 | 57849121 | 57868307 | 19.186  |
| 10 | 57881115 | 57970136 | 89.021  |
| 10 | 58005763 | 58292861 | 287.098 |
| 10 | 58355118 | 58797882 | 442.764 |
| 10 | 58959193 | 58959285 | 0.092   |
| 10 | 58959337 | 59023663 | 64.326  |
| 10 | 59051814 | 59051885 | 0.071   |
| 10 | 59062848 | 59062946 | 0.098   |
| 10 | 59457050 | 59730321 | 273.271 |
| 10 | 59809434 | 59852777 | 43.343  |
| 10 | 59885402 | 59885573 | 0.171   |
| 10 | 59892404 | 59918544 | 26.14   |
| 10 | 59918753 | 60074546 | 155.793 |
| 10 | 60082209 | 60082587 | 0.378   |
| 10 | 60087599 | 60087681 | 0.082   |
| 10 | 60091319 | 60091334 | 0.015   |
| 10 | 60102460 | 60114136 | 11.676  |
| 10 | 60140739 | 60140761 | 0.022   |
| 10 | 60145164 | 60145169 | 0.005   |
| 10 | 60146962 | 60147039 | 0.077   |
| 10 | 60238853 | 60277402 | 38.549  |
| 10 | 60277444 | 60322917 | 45.473  |
| 10 | 60468893 | 60527879 | 58.986  |
| 10 | 60537915 | 60630775 | 92.86   |
| 10 | 60711572 | 60845392 | 133.82  |
| 10 | 60922044 | 61259237 | 337.193 |
| 10 | 61312190 | 61331457 | 19.267  |
| 10 | 61350746 | 61359865 | 9.119   |
| 10 | 61373240 | 61387469 | 14.229  |
| 10 | 61387485 | 61514173 | 126.688 |
| 10 | 61611532 | 61616192 | 4.66    |
| 10 | 61638768 | 61650841 | 12.073  |
| 10 | 61665798 | 61681545 | 15.747  |
| 10 | 61764373 | 61801641 | 37.268  |
| 10 | 61801652 | 61801691 | 0.039   |
| 10 | 61813268 | 61815126 | 1.858   |
| 10 | 62061379 | 62104688 | 43.309  |
| 10 | 62514012 | 62647803 | 133.791 |
| 10 | 62722021 | 62755620 | 33.599  |
| 10 | 62758614 | 62760856 | 2.242   |
| 10 | 62767287 | 62767296 | 0.009   |
| 10 | 62787132 | 62809391 | 22.259  |
| 10 | 62809395 | 62819978 | 10.583  |
| 10 | 62871630 | 62873549 | 1.919   |
| 10 | 62904628 | 62948693 | 44.065  |
| 10 | 62948799 | 62950528 | 1.729   |
| 10 | 62950565 | 62956649 | 6.084   |
| 10 | 62963029 | 62963061 | 0.032   |
| 10 | 63060989 | 63175992 | 115.003 |
| 10 | 63178955 | 63179055 | 0.1     |
| 10 | 63197046 | 63200096 | 3.05    |
| 10 | 63213333 | 63213502 | 0.169   |
| 10 | 63213574 | 63213744 | 0.17    |
| 10 | 63221098 | 63221272 | 0.174   |

|    |          |          |         |
|----|----------|----------|---------|
| 10 | 63226952 | 63227105 | 0.153   |
| 10 | 63287325 | 63297035 | 9.71    |
| 10 | 63339280 | 63355202 | 15.922  |
| 10 | 63355207 | 63385063 | 29.856  |
| 10 | 63394722 | 63451433 | 56.711  |
| 10 | 63456925 | 63462225 | 5.3     |
| 10 | 63463274 | 63463564 | 0.29    |
| 10 | 63474812 | 63474818 | 0.006   |
| 10 | 63519122 | 63530995 | 11.873  |
| 10 | 63540121 | 63554520 | 14.399  |
| 10 | 63590155 | 63629362 | 39.207  |
| 10 | 63669866 | 63725092 | 55.226  |
| 10 | 63726232 | 63739997 | 13.765  |
| 10 | 63757646 | 63845415 | 87.769  |
| 10 | 63915006 | 64047083 | 132.077 |
| 10 | 64085691 | 64122010 | 36.319  |
| 10 | 64266032 | 64316344 | 50.312  |
| 10 | 64340879 | 64342332 | 1.453   |
| 10 | 64384583 | 64386106 | 1.523   |
| 10 | 64432653 | 64435751 | 3.098   |
| 10 | 64438801 | 64441233 | 2.432   |
| 10 | 64530466 | 64538374 | 7.908   |
| 10 | 64738631 | 65090244 | 351.613 |
| 10 | 65189171 | 65191495 | 2.324   |
| 10 | 65197657 | 65197815 | 0.158   |
| 10 | 65294503 | 65294560 | 0.057   |
| 10 | 65299031 | 65299776 | 0.745   |
| 10 | 65302588 | 65302618 | 0.03    |
| 10 | 65310958 | 65333363 | 22.405  |
| 10 | 65360365 | 65360605 | 0.24    |
| 10 | 65426693 | 65505923 | 79.23   |
| 10 | 65528736 | 65634884 | 106.148 |
| 10 | 65637158 | 65637228 | 0.07    |
| 10 | 65637236 | 65637519 | 0.283   |
| 10 | 65649096 | 65744023 | 94.927  |
| 10 | 65798418 | 65798530 | 0.112   |
| 10 | 65798823 | 65812626 | 13.803  |
| 10 | 65812657 | 66250075 | 437.418 |
| 10 | 66268524 | 66294552 | 26.028  |
| 10 | 66305664 | 66305882 | 0.218   |
| 10 | 66305936 | 66306038 | 0.102   |
| 10 | 66308964 | 66315334 | 6.37    |
| 10 | 66592011 | 66594695 | 2.684   |
| 10 | 66612626 | 66616831 | 4.205   |
| 11 | 33464    | 71420    | 37.956  |
| 11 | 86186    | 126954   | 40.768  |
| 11 | 137195   | 145446   | 8.251   |
| 11 | 167799   | 188592   | 20.793  |
| 11 | 188614   | 288113   | 99.499  |
| 11 | 420741   | 420951   | 0.21    |
| 11 | 526233   | 609978   | 83.745  |
| 11 | 639600   | 680475   | 40.875  |
| 11 | 687310   | 695233   | 7.923   |
| 11 | 719005   | 744917   | 25.912  |
| 11 | 789033   | 863531   | 74.498  |
| 11 | 1522712  | 1551622  | 28.91   |
| 11 | 1591273  | 1882550  | 291.277 |
| 11 | 1940444  | 1975048  | 34.604  |
| 11 | 1990213  | 2072782  | 82.569  |
| 11 | 2135152  | 2153397  | 18.245  |
| 11 | 2153415  | 2153426  | 0.011   |



|    |          |          |         |
|----|----------|----------|---------|
| 11 | 2269735  | 2269797  | 0.062   |
| 11 | 2283627  | 2283668  | 0.041   |
| 11 | 2322690  | 2341493  | 18.803  |
| 11 | 2341547  | 2346144  | 4.597   |
| 11 | 2389402  | 2408350  | 18.948  |
| 11 | 2444308  | 2457119  | 12.811  |
| 11 | 2458465  | 2481116  | 22.651  |
| 11 | 2503527  | 2517120  | 13.593  |
| 11 | 2555806  | 2584082  | 28.276  |
| 11 | 2668039  | 2706709  | 38.67   |
| 11 | 2747956  | 2769140  | 21.184  |
| 11 | 2808629  | 2923828  | 115.199 |
| 11 | 2946745  | 2946890  | 0.145   |
| 11 | 2956591  | 3048314  | 91.723  |
| 11 | 3073007  | 3073130  | 0.123   |
| 11 | 3109140  | 3122473  | 13.333  |
| 11 | 3161140  | 3282074  | 120.934 |
| 11 | 3311604  | 3365532  | 53.928  |
| 11 | 3426798  | 3485753  | 58.955  |
| 11 | 3496062  | 3543309  | 47.247  |
| 11 | 3567157  | 3575990  | 8.833   |
| 11 | 3601261  | 3607514  | 6.253   |
| 11 | 3612372  | 3619996  | 7.624   |
| 11 | 3625597  | 3662237  | 36.64   |
| 11 | 3753438  | 3959239  | 205.801 |
| 11 | 4015100  | 4384254  | 369.154 |
| 11 | 4507548  | 5099221  | 591.673 |
| 11 | 5105912  | 5123476  | 17.564  |
| 11 | 5182175  | 5211335  | 29.16   |
| 11 | 5235747  | 5269263  | 33.516  |
| 11 | 5320289  | 5356613  | 36.324  |
| 11 | 5356621  | 5671596  | 314.975 |
| 11 | 5769915  | 5862214  | 92.299  |
| 11 | 5895223  | 5906821  | 11.598  |
| 11 | 5906936  | 5935093  | 28.157  |
| 11 | 5971622  | 6060471  | 88.849  |
| 11 | 6072043  | 6083067  | 11.024  |
| 11 | 6085101  | 6229343  | 144.242 |
| 11 | 6250904  | 6312221  | 61.317  |
| 11 | 6313945  | 6313987  | 0.042   |
| 11 | 6314004  | 6319202  | 5.198   |
| 11 | 6321261  | 6321499  | 0.238   |
| 11 | 6351853  | 6363044  | 11.191  |
| 11 | 6366223  | 6414835  | 48.612  |
| 11 | 6415062  | 6415134  | 0.072   |
| 11 | 6437888  | 6619316  | 181.428 |
| 11 | 6622350  | 6630238  | 7.888   |
| 11 | 6648220  | 6824323  | 176.103 |
| 11 | 6837569  | 6918357  | 80.788  |
| 11 | 7095181  | 7270682  | 175.501 |
| 11 | 7274818  | 7561774  | 286.956 |
| 11 | 7639533  | 7721991  | 82.458  |
| 11 | 7751202  | 7996118  | 244.916 |
| 11 | 8036209  | 8258372  | 222.163 |
| 11 | 8347817  | 8665712  | 317.895 |
| 11 | 9398741  | 9674755  | 276.014 |
| 11 | 10272737 | 10377647 | 104.91  |
| 11 | 10400737 | 11376721 | 975.984 |
| 11 | 11416063 | 11476649 | 60.586  |
| 11 | 11487897 | 11538523 | 50.626  |
| 11 | 11539444 | 11877498 | 338.054 |

|    |          |          |          |
|----|----------|----------|----------|
| 11 | 11881526 | 11881681 | 0.155    |
| 11 | 12008156 | 12081219 | 73.063   |
| 11 | 12175894 | 12763641 | 587.747  |
| 11 | 12903500 | 13677090 | 773.59   |
| 11 | 13681878 | 13919071 | 237.193  |
| 11 | 13958746 | 14050593 | 91.847   |
| 11 | 14430516 | 14708092 | 277.576  |
| 11 | 14711506 | 14729085 | 17.579   |
| 11 | 14763289 | 14789893 | 26.604   |
| 11 | 14789952 | 14866999 | 77.047   |
| 11 | 14878284 | 14891715 | 13.431   |
| 11 | 15093891 | 15153140 | 59.249   |
| 11 | 15170616 | 15599316 | 428.7    |
| 11 | 15698567 | 15724346 | 25.779   |
| 11 | 15890977 | 16035458 | 144.481  |
| 11 | 16084085 | 16560022 | 475.937  |
| 11 | 16624483 | 16624747 | 0.264    |
| 11 | 16658381 | 16668084 | 9.703    |
| 11 | 16670737 | 17441714 | 770.977  |
| 11 | 17506669 | 17714729 | 208.06   |
| 11 | 17769724 | 18328775 | 559.051  |
| 11 | 18356560 | 18980893 | 624.333  |
| 11 | 19083022 | 19083455 | 0.433    |
| 11 | 19083504 | 19083513 | 0.009    |
| 11 | 19083520 | 19083561 | 0.041    |
| 11 | 19103021 | 19144151 | 41.13    |
| 11 | 19655577 | 19655583 | 0.006    |
| 11 | 19788919 | 19802630 | 13.711   |
| 11 | 19937413 | 20029989 | 92.576   |
| 11 | 20066063 | 20349788 | 283.725  |
| 11 | 20349797 | 20851533 | 501.736  |
| 11 | 20851566 | 20987162 | 135.596  |
| 11 | 20987177 | 21778279 | 791.102  |
| 11 | 21786079 | 22574550 | 788.471  |
| 11 | 22577923 | 22595847 | 17.924   |
| 11 | 22653068 | 22695798 | 42.73    |
| 11 | 22755533 | 22767971 | 12.438   |
| 11 | 22768007 | 22780181 | 12.174   |
| 11 | 23102332 | 23300755 | 198.423  |
| 11 | 23312600 | 23312712 | 0.112    |
| 11 | 23536795 | 23742287 | 205.492  |
| 11 | 23773592 | 23899814 | 126.222  |
| 11 | 24361922 | 24445568 | 83.646   |
| 11 | 24501689 | 24612326 | 110.637  |
| 11 | 24934025 | 25589531 | 655.506  |
| 11 | 25913664 | 26931652 | 1017.988 |
| 11 | 27100682 | 28646510 | 1545.828 |
| 11 | 31127881 | 33577470 | 2449.589 |
| 11 | 33858926 | 34186655 | 327.729  |
| 11 | 34430158 | 34719572 | 289.414  |
| 11 | 34719650 | 34719660 | 0.01     |
| 11 | 34719816 | 34719830 | 0.014    |
| 11 | 34719873 | 34719884 | 0.011    |
| 11 | 34719939 | 34719950 | 0.011    |
| 11 | 34719953 | 34719962 | 0.009    |
| 11 | 34719991 | 34719998 | 0.007    |
| 11 | 34720020 | 34720129 | 0.109    |
| 11 | 34720145 | 34720166 | 0.021    |
| 11 | 34720186 | 34720192 | 0.006    |
| 11 | 34720202 | 34720212 | 0.01     |
| 11 | 34720444 | 34720456 | 0.012    |

|    |          |          |         |
|----|----------|----------|---------|
| 11 | 34720482 | 34720511 | 0.029   |
| 11 | 34720519 | 34720549 | 0.03    |
| 11 | 34720670 | 34720684 | 0.014   |
| 11 | 34720690 | 34720701 | 0.011   |
| 11 | 34720703 | 34720715 | 0.012   |
| 11 | 34720862 | 34720928 | 0.066   |
| 11 | 34720941 | 34720963 | 0.022   |
| 11 | 34721008 | 34721032 | 0.024   |
| 11 | 34721038 | 34721076 | 0.038   |
| 11 | 34721161 | 34721185 | 0.024   |
| 11 | 34721193 | 34721214 | 0.021   |
| 11 | 34721229 | 34721236 | 0.007   |
| 11 | 34721297 | 34721310 | 0.013   |
| 11 | 34721318 | 34721387 | 0.069   |
| 11 | 34721522 | 34721559 | 0.037   |
| 11 | 34721589 | 34721601 | 0.012   |
| 11 | 34721679 | 34721715 | 0.036   |
| 11 | 34721719 | 34721722 | 0.003   |
| 11 | 34721838 | 34871522 | 149.684 |
| 11 | 34871539 | 34871555 | 0.016   |
| 11 | 34871557 | 34871579 | 0.022   |
| 11 | 34871583 | 34871593 | 0.01    |
| 11 | 34871623 | 34871633 | 0.01    |
| 11 | 34871636 | 34871652 | 0.016   |
| 11 | 34871736 | 34871749 | 0.013   |
| 11 | 34871753 | 34871839 | 0.086   |
| 11 | 34871902 | 34871969 | 0.067   |
| 11 | 34872017 | 34872021 | 0.004   |
| 11 | 34872135 | 34872141 | 0.006   |
| 11 | 34872437 | 34872453 | 0.016   |
| 11 | 34872524 | 34872541 | 0.017   |
| 11 | 34872669 | 34872707 | 0.038   |
| 11 | 34872711 | 34872726 | 0.015   |
| 11 | 34873269 | 34873385 | 0.116   |
| 11 | 34873402 | 34873413 | 0.011   |
| 11 | 34873563 | 34873587 | 0.024   |
| 11 | 34874178 | 34874187 | 0.009   |
| 11 | 34874724 | 34874748 | 0.024   |
| 11 | 34874844 | 34874859 | 0.015   |
| 11 | 34875025 | 34875045 | 0.02    |
| 11 | 34875060 | 34875066 | 0.006   |
| 11 | 34875085 | 34875101 | 0.016   |
| 11 | 34875343 | 34875348 | 0.005   |
| 11 | 34875539 | 34875910 | 0.371   |
| 11 | 34875975 | 34876171 | 0.196   |
| 11 | 34876283 | 34876511 | 0.228   |
| 11 | 34876513 | 34876520 | 0.007   |
| 11 | 34876528 | 34876797 | 0.269   |
| 11 | 34877538 | 34877553 | 0.015   |
| 11 | 34877554 | 34877598 | 0.044   |
| 11 | 34878666 | 34878682 | 0.016   |
| 11 | 34878904 | 34879071 | 0.167   |
| 11 | 34879904 | 34879919 | 0.015   |
| 11 | 34879983 | 34880075 | 0.092   |
| 11 | 34880099 | 34880118 | 0.019   |
| 11 | 34880159 | 34880166 | 0.007   |
| 11 | 34880225 | 34880228 | 0.003   |
| 11 | 34880480 | 34880523 | 0.043   |
| 11 | 34880553 | 34880611 | 0.058   |
| 11 | 34880626 | 34880631 | 0.005   |
| 11 | 34880663 | 34880693 | 0.03    |

|    |          |          |       |
|----|----------|----------|-------|
| 11 | 34880984 | 34881096 | 0.112 |
| 11 | 34881119 | 34881126 | 0.007 |
| 11 | 34881212 | 34881240 | 0.028 |
| 11 | 34881400 | 34881407 | 0.007 |
| 11 | 34881421 | 34881429 | 0.008 |
| 11 | 34881612 | 34881626 | 0.014 |
| 11 | 34881680 | 34881693 | 0.013 |
| 11 | 34881734 | 34881746 | 0.012 |
| 11 | 34881756 | 34881761 | 0.005 |
| 11 | 34881833 | 34881860 | 0.027 |
| 11 | 34881978 | 34881993 | 0.015 |
| 11 | 34882025 | 34882028 | 0.003 |
| 11 | 34882158 | 34882171 | 0.013 |
| 11 | 34882318 | 34882328 | 0.01  |
| 11 | 34882472 | 34882483 | 0.011 |
| 11 | 34882519 | 34882538 | 0.019 |
| 11 | 34882774 | 34882782 | 0.008 |
| 11 | 34882829 | 34882879 | 0.05  |
| 11 | 34883882 | 34884313 | 0.431 |
| 11 | 34884338 | 34884431 | 0.093 |
| 11 | 34884566 | 34884691 | 0.125 |
| 11 | 34884700 | 34884711 | 0.011 |
| 11 | 34884892 | 34884898 | 0.006 |
| 11 | 34885023 | 34885047 | 0.024 |
| 11 | 34885203 | 34885213 | 0.01  |
| 11 | 34885327 | 34885360 | 0.033 |
| 11 | 34885372 | 34886222 | 0.85  |
| 11 | 34886286 | 34886292 | 0.006 |
| 11 | 34886314 | 34886320 | 0.006 |
| 11 | 34886339 | 34886354 | 0.015 |
| 11 | 34886357 | 34886360 | 0.003 |
| 11 | 34886384 | 34886405 | 0.021 |
| 11 | 34886531 | 34886670 | 0.139 |
| 11 | 34886932 | 34886948 | 0.016 |
| 11 | 34886999 | 34887082 | 0.083 |
| 11 | 34887237 | 34887373 | 0.136 |
| 11 | 34887409 | 34887417 | 0.008 |
| 11 | 34888041 | 34889059 | 1.018 |
| 11 | 34889866 | 34889873 | 0.007 |
| 11 | 34890255 | 34890263 | 0.008 |
| 11 | 34890447 | 34890464 | 0.017 |
| 11 | 34890623 | 34890648 | 0.025 |
| 11 | 34891210 | 34892013 | 0.803 |
| 11 | 34892098 | 34892115 | 0.017 |
| 11 | 34892364 | 34892374 | 0.01  |
| 11 | 34892604 | 34892611 | 0.007 |
| 11 | 34892621 | 34892626 | 0.005 |
| 11 | 34892787 | 34892796 | 0.009 |
| 11 | 34892811 | 34893034 | 0.223 |
| 11 | 34893143 | 34893482 | 0.339 |
| 11 | 34893540 | 34893948 | 0.408 |
| 11 | 34893951 | 34893956 | 0.005 |
| 11 | 34893961 | 34893969 | 0.008 |
| 11 | 34894032 | 34894039 | 0.007 |
| 11 | 34895496 | 34895555 | 0.059 |
| 11 | 34895730 | 34895736 | 0.006 |
| 11 | 34895956 | 34895988 | 0.032 |
| 11 | 34895990 | 34896004 | 0.014 |
| 11 | 34896170 | 34896188 | 0.018 |
| 11 | 34896323 | 34896560 | 0.237 |
| 11 | 34897053 | 34897344 | 0.291 |

|    |          |          |          |
|----|----------|----------|----------|
| 11 | 34897433 | 34897534 | 0.101    |
| 11 | 34897563 | 34897577 | 0.014    |
| 11 | 34897776 | 34897867 | 0.091    |
| 11 | 34897874 | 34898248 | 0.374    |
| 11 | 34898255 | 34898749 | 0.494    |
| 11 | 34898765 | 34899572 | 0.807    |
| 11 | 34899574 | 34899600 | 0.026    |
| 11 | 34899645 | 34899908 | 0.263    |
| 11 | 34900230 | 36195343 | 1295.113 |
| 11 | 37733215 | 40617293 | 2884.078 |
| 11 | 41535500 | 42906379 | 1370.879 |
| 11 | 43270499 | 43722969 | 452.47   |
| 11 | 43889108 | 44072179 | 183.071  |
| 11 | 44265228 | 44387879 | 122.651  |
| 11 | 44767573 | 44807888 | 40.315   |
| 11 | 44810181 | 44962451 | 152.27   |
| 11 | 45069242 | 45202146 | 132.904  |
| 11 | 45470665 | 45691888 | 221.223  |
| 11 | 46086159 | 46439437 | 353.278  |
| 11 | 46496506 | 46525242 | 28.736   |
| 11 | 46652083 | 47153883 | 501.8    |
| 11 | 47859120 | 48003720 | 144.6    |
| 11 | 48129776 | 48414687 | 284.911  |
| 11 | 48572330 | 48753171 | 180.841  |
| 11 | 49161505 | 49566067 | 404.562  |
| 11 | 50041286 | 50104111 | 62.825   |
| 11 | 58471135 | 59292948 | 821.813  |
| 11 | 59479207 | 59717471 | 238.264  |
| 11 | 59823388 | 59969548 | 146.16   |
| 11 | 60143888 | 60443330 | 299.442  |
| 11 | 60469535 | 60494809 | 25.274   |
| 11 | 60679017 | 60750441 | 71.424   |
| 11 | 60833976 | 60883951 | 49.975   |
| 11 | 60938220 | 61245956 | 307.736  |
| 11 | 61245963 | 61245970 | 0.007    |
| 11 | 61362297 | 61362341 | 0.044    |
| 11 | 61416094 | 61780397 | 364.303  |
| 11 | 62498504 | 62669033 | 170.529  |
| 11 | 62822350 | 62920212 | 97.862   |
| 11 | 62976625 | 63206139 | 229.514  |
| 11 | 63523477 | 63547549 | 24.072   |
| 11 | 63562212 | 63979148 | 416.936  |
| 11 | 64088464 | 64162723 | 74.259   |
| 11 | 64224854 | 64671332 | 446.478  |
| 11 | 64700822 | 64701472 | 0.65     |
| 11 | 64762874 | 64784211 | 21.337   |
| 11 | 64804301 | 64812017 | 7.716    |
| 11 | 64948506 | 64953818 | 5.312    |
| 11 | 64953823 | 64953984 | 0.161    |
| 11 | 64953995 | 64954010 | 0.015    |
| 11 | 64954041 | 64954536 | 0.495    |
| 11 | 65141651 | 65142550 | 0.899    |
| 11 | 65144437 | 65144455 | 0.018    |
| 11 | 65145873 | 65420497 | 274.624  |
| 11 | 65420543 | 65454589 | 34.046   |
| 11 | 65457005 | 65512302 | 55.297   |
| 11 | 65512326 | 65575489 | 63.163   |
| 11 | 65587570 | 65621986 | 34.416   |
| 11 | 65645066 | 65645084 | 0.018    |
| 11 | 65645088 | 65672709 | 27.621   |
| 11 | 65672740 | 65672744 | 0.004    |

|    |          |          |         |
|----|----------|----------|---------|
| 11 | 65683709 | 65797522 | 113.813 |
| 11 | 65798638 | 65802136 | 3.498   |
| 11 | 65802138 | 65802435 | 0.297   |
| 11 | 65802437 | 65809845 | 7.408   |
| 11 | 65838188 | 65838214 | 0.026   |
| 11 | 65889329 | 66007035 | 117.706 |
| 11 | 66061745 | 66117795 | 56.05   |
| 11 | 66325977 | 66560697 | 234.72  |
| 11 | 66560713 | 66928558 | 367.845 |
| 11 | 66932040 | 67034074 | 102.034 |
| 11 | 67041562 | 67183327 | 141.765 |
| 11 | 67195426 | 67202402 | 6.976   |
| 11 | 67281461 | 67316065 | 34.604  |
| 11 | 67330651 | 67387128 | 56.477  |
| 11 | 67387148 | 67431278 | 44.13   |
| 11 | 67538416 | 67586896 | 48.48   |
| 11 | 67750623 | 67876784 | 126.161 |
| 11 | 67891655 | 68424544 | 532.889 |
| 11 | 68425472 | 68488295 | 62.823  |
| 11 | 68540389 | 68618441 | 78.052  |
| 11 | 68618494 | 68705496 | 87.002  |
| 11 | 68709107 | 68738182 | 29.075  |
| 11 | 68738201 | 68794929 | 56.728  |
| 11 | 68903624 | 68907425 | 3.801   |
| 11 | 68920283 | 68953830 | 33.547  |
| 11 | 68966652 | 68975104 | 8.452   |
| 11 | 69020864 | 69051880 | 31.016  |
| 11 | 69090606 | 69330333 | 239.727 |
| 11 | 69330349 | 69410399 | 80.05   |
| 11 | 69615674 | 69680910 | 65.236  |
| 11 | 69720446 | 69788999 | 68.553  |
| 11 | 69848689 | 70175685 | 326.996 |
| 11 | 70191461 | 70282750 | 91.289  |
| 11 | 70391806 | 70394549 | 2.743   |
| 11 | 70573361 | 70632683 | 59.322  |
| 11 | 70677958 | 71193462 | 515.504 |
| 11 | 71224054 | 71357425 | 133.371 |
| 11 | 71400156 | 71499706 | 99.55   |
| 11 | 71519780 | 71559246 | 39.466  |
| 11 | 71576592 | 71604643 | 28.051  |
| 11 | 71612710 | 71679359 | 66.649  |
| 11 | 71679393 | 71709798 | 30.405  |
| 11 | 71826948 | 72015334 | 188.386 |
| 11 | 72130089 | 72208451 | 78.362  |
| 11 | 72395178 | 72820165 | 424.987 |
| 11 | 72983968 | 73252983 | 269.015 |
| 11 | 73397350 | 73583139 | 185.789 |
| 11 | 73994556 | 74188520 | 193.964 |
| 11 | 74270284 | 74270287 | 0.003   |
| 11 | 74270314 | 74270347 | 0.033   |
| 11 | 74270348 | 74270358 | 0.01    |
| 11 | 74276050 | 74387699 | 111.649 |
| 11 | 74414983 | 74471954 | 56.971  |
| 11 | 74593238 | 74593263 | 0.025   |
| 11 | 74596597 | 74596747 | 0.15    |
| 11 | 74605224 | 74768293 | 163.069 |
| 11 | 74770026 | 74772826 | 2.8     |
| 11 | 74872303 | 74872339 | 0.036   |
| 11 | 74916768 | 74985868 | 69.1    |
| 11 | 75008987 | 75086872 | 77.885  |
| 11 | 75265814 | 75290129 | 24.315  |

|    |          |          |         |
|----|----------|----------|---------|
| 11 | 75355372 | 75528142 | 172.77  |
| 11 | 75579075 | 76025038 | 445.963 |
| 11 | 76118760 | 76165241 | 46.481  |
| 11 | 76181307 | 76210315 | 29.008  |
| 11 | 76234927 | 76255828 | 20.901  |
| 11 | 76317595 | 76352584 | 34.989  |
| 11 | 76365940 | 76506726 | 140.786 |
| 11 | 76516851 | 76516882 | 0.031   |
| 11 | 76516962 | 76586012 | 69.05   |
| 11 | 76598678 | 76675144 | 76.466  |
| 11 | 76675177 | 76700731 | 25.554  |
| 11 | 76702255 | 76735075 | 32.82   |
| 11 | 76737627 | 76905435 | 167.808 |
| 11 | 76960809 | 77016382 | 55.573  |
| 11 | 77046562 | 77104667 | 58.105  |
| 11 | 77116848 | 77150278 | 33.43   |
| 11 | 77150706 | 77156264 | 5.558   |
| 11 | 77167491 | 77167545 | 0.054   |
| 11 | 77169288 | 77175519 | 6.231   |
| 11 | 77178165 | 77178204 | 0.039   |
| 11 | 77212358 | 77284453 | 72.095  |
| 11 | 77297111 | 77299461 | 2.35    |
| 11 | 77302135 | 77334422 | 32.287  |
| 11 | 77338858 | 77341919 | 3.061   |
| 11 | 77352551 | 77382743 | 30.192  |
| 11 | 77398758 | 77398766 | 0.008   |
| 11 | 77447300 | 77467075 | 19.775  |
| 11 | 77467298 | 77521585 | 54.287  |
| 11 | 77521625 | 77610245 | 88.62   |
| 11 | 77704745 | 77708737 | 3.992   |
| 11 | 77721645 | 77738588 | 16.943  |
| 11 | 77738590 | 77738593 | 0.003   |
| 11 | 77738747 | 77893531 | 154.784 |
| 11 | 78023762 | 78084061 | 60.299  |
| 11 | 78142214 | 78154791 | 12.577  |
| 11 | 78171297 | 78184269 | 12.972  |
| 11 | 78225723 | 78229045 | 3.322   |
| 11 | 78279516 | 78318645 | 39.129  |
| 11 | 78318648 | 78678168 | 359.52  |
| 11 | 78686435 | 78792682 | 106.247 |
| 11 | 78804463 | 78882793 | 78.33   |
| 11 | 78882824 | 78883528 | 0.704   |
| 11 | 78883852 | 78893106 | 9.254   |
| 11 | 78895166 | 78911509 | 16.343  |
| 11 | 78924870 | 78940322 | 15.452  |
| 11 | 78951149 | 78954879 | 3.73    |
| 11 | 78960140 | 78973121 | 12.981  |
| 11 | 78979646 | 78986116 | 6.47    |
| 11 | 79020817 | 79022542 | 1.725   |
| 11 | 79023715 | 79099234 | 75.519  |
| 11 | 79115644 | 79119935 | 4.291   |
| 11 | 79136126 | 79176980 | 40.854  |
| 11 | 79211682 | 79225425 | 13.743  |
| 11 | 79240143 | 79439260 | 199.117 |
| 11 | 79439266 | 79588381 | 149.115 |
| 11 | 79588621 | 79663239 | 74.618  |
| 11 | 79663356 | 79745799 | 82.443  |
| 12 | 58150    | 75185    | 17.035  |
| 12 | 78539    | 81852    | 3.313   |
| 12 | 116132   | 196166   | 80.034  |
| 12 | 215152   | 388698   | 173.546 |

|    |         |         |         |
|----|---------|---------|---------|
| 12 | 414432  | 433193  | 18.761  |
| 12 | 447824  | 465563  | 17.739  |
| 12 | 490615  | 508646  | 18.031  |
| 12 | 552338  | 558052  | 5.714   |
| 12 | 561068  | 570604  | 9.536   |
| 12 | 575829  | 605822  | 29.993  |
| 12 | 611917  | 611940  | 0.023   |
| 12 | 611951  | 611994  | 0.043   |
| 12 | 645137  | 658815  | 13.678  |
| 12 | 665564  | 673003  | 7.439   |
| 12 | 691736  | 753931  | 62.195  |
| 12 | 757917  | 776525  | 18.608  |
| 12 | 780470  | 784268  | 3.798   |
| 12 | 805211  | 838161  | 32.95   |
| 12 | 845347  | 845352  | 0.005   |
| 12 | 846122  | 852671  | 6.549   |
| 12 | 859088  | 868083  | 8.995   |
| 12 | 925051  | 1002140 | 77.089  |
| 12 | 1026799 | 1026846 | 0.047   |
| 12 | 1030211 | 1099726 | 69.515  |
| 12 | 1112238 | 1149103 | 36.865  |
| 12 | 1149105 | 1149143 | 0.038   |
| 12 | 1263331 | 1277956 | 14.625  |
| 12 | 1479046 | 1517302 | 38.256  |
| 12 | 1518270 | 1620869 | 102.599 |
| 12 | 1677966 | 1698881 | 20.915  |
| 12 | 1699868 | 1894769 | 194.901 |
| 12 | 1908626 | 1916241 | 7.615   |
| 12 | 1934157 | 1940350 | 6.193   |
| 12 | 1943411 | 1969136 | 25.725  |
| 12 | 1994947 | 2019514 | 24.567  |
| 12 | 2022453 | 2103529 | 81.076  |
| 12 | 2121600 | 2182174 | 60.574  |
| 12 | 2201411 | 2217080 | 15.669  |
| 12 | 2417606 | 2417825 | 0.219   |
| 12 | 2572543 | 2588602 | 16.059  |
| 12 | 2601228 | 2654715 | 53.487  |
| 12 | 2681232 | 2684520 | 3.288   |
| 12 | 2690154 | 2690346 | 0.192   |
| 12 | 2693753 | 2750443 | 56.69   |
| 12 | 2752634 | 2759040 | 6.406   |
| 12 | 2762843 | 2767016 | 4.173   |
| 12 | 2769347 | 2792583 | 23.236  |
| 12 | 2798968 | 2826737 | 27.769  |
| 12 | 2832932 | 2837420 | 4.488   |
| 12 | 2883473 | 2922818 | 39.345  |
| 12 | 2958441 | 2959086 | 0.645   |
| 12 | 2959094 | 3193500 | 234.406 |
| 12 | 3200712 | 3510662 | 309.95  |
| 12 | 3546219 | 3546261 | 0.042   |
| 12 | 3546917 | 3644732 | 97.815  |
| 12 | 3649183 | 3671607 | 22.424  |
| 12 | 3683174 | 3727209 | 44.035  |
| 12 | 3747848 | 3752614 | 4.766   |
| 12 | 3825256 | 3940389 | 115.133 |
| 12 | 3946537 | 3988035 | 41.498  |
| 12 | 3988092 | 4030031 | 41.939  |
| 12 | 4042508 | 4252535 | 210.027 |
| 12 | 4266579 | 4293935 | 27.356  |
| 12 | 4328462 | 4400386 | 71.924  |
| 12 | 4432587 | 4450398 | 17.811  |



|    |          |          |         |
|----|----------|----------|---------|
| 12 | 4456165  | 4585750  | 129.585 |
| 12 | 4613189  | 4613279  | 0.09    |
| 12 | 4661588  | 4677029  | 15.441  |
| 12 | 4696046  | 4702666  | 6.62    |
| 12 | 4727362  | 4745049  | 17.687  |
| 12 | 4802231  | 4823578  | 21.347  |
| 12 | 4856719  | 4864801  | 8.082   |
| 12 | 4929975  | 4994238  | 64.263  |
| 12 | 4994241  | 4998935  | 4.694   |
| 12 | 4998950  | 4999869  | 0.919   |
| 12 | 5089805  | 5097667  | 7.862   |
| 12 | 5109383  | 5138885  | 29.502  |
| 12 | 5139210  | 5139338  | 0.128   |
| 12 | 5144253  | 5187556  | 43.303  |
| 12 | 5208946  | 5233369  | 24.423  |
| 12 | 5265209  | 5378413  | 113.204 |
| 12 | 5399526  | 5402143  | 2.617   |
| 12 | 5418499  | 5418502  | 0.003   |
| 12 | 5420108  | 5449427  | 29.319  |
| 12 | 5464972  | 5468894  | 3.922   |
| 12 | 5501242  | 5503502  | 2.26    |
| 12 | 5533010  | 5533089  | 0.079   |
| 12 | 5539032  | 5539055  | 0.023   |
| 12 | 5541042  | 5544604  | 3.562   |
| 12 | 5590493  | 5594463  | 3.97    |
| 12 | 5598606  | 5602056  | 3.45    |
| 12 | 5619669  | 5901626  | 281.957 |
| 12 | 5965571  | 5965669  | 0.098   |
| 12 | 5999149  | 6016100  | 16.951  |
| 12 | 6262781  | 6334266  | 71.485  |
| 12 | 6355442  | 6362723  | 7.281   |
| 12 | 6436066  | 6439231  | 3.165   |
| 12 | 6494819  | 6494856  | 0.037   |
| 12 | 6521441  | 6758014  | 236.573 |
| 12 | 6771152  | 6805468  | 34.316  |
| 12 | 6818061  | 6855354  | 37.293  |
| 12 | 6978665  | 7074766  | 96.101  |
| 12 | 7217758  | 7231980  | 14.222  |
| 12 | 7531053  | 7543876  | 12.823  |
| 12 | 7665888  | 7917157  | 251.269 |
| 12 | 7973473  | 8105902  | 132.429 |
| 12 | 8174510  | 8180278  | 5.768   |
| 12 | 8392123  | 8461141  | 69.018  |
| 12 | 8681084  | 8931343  | 250.259 |
| 12 | 8945447  | 8990121  | 44.674  |
| 12 | 9150172  | 9218005  | 67.833  |
| 12 | 9400847  | 9474421  | 73.574  |
| 12 | 9586021  | 9640793  | 54.772  |
| 12 | 9714778  | 9933589  | 218.811 |
| 12 | 9968849  | 9986017  | 17.168  |
| 12 | 9988029  | 9988051  | 0.022   |
| 12 | 9990326  | 10029258 | 38.932  |
| 12 | 10047194 | 10108418 | 61.224  |
| 12 | 10176077 | 10328598 | 152.521 |
| 12 | 10352921 | 10382284 | 29.363  |
| 12 | 10382727 | 10514955 | 132.228 |
| 12 | 10970161 | 11071486 | 101.325 |
| 12 | 11076137 | 11151093 | 74.956  |
| 12 | 11188594 | 11204508 | 15.914  |
| 12 | 11204513 | 11218233 | 13.72   |
| 12 | 11350746 | 11389898 | 39.152  |

|    |          |          |         |
|----|----------|----------|---------|
| 12 | 11406739 | 11440556 | 33.817  |
| 12 | 11443858 | 11466713 | 22.855  |
| 12 | 11473687 | 11474585 | 0.898   |
| 12 | 11477575 | 11480406 | 2.831   |
| 12 | 11563679 | 12176741 | 613.062 |
| 12 | 12199977 | 12348595 | 148.618 |
| 12 | 12359274 | 12484308 | 125.034 |
| 12 | 12499400 | 12520274 | 20.874  |
| 12 | 12526775 | 12540053 | 13.278  |
| 12 | 12586169 | 12597806 | 11.637  |
| 12 | 12605261 | 12622922 | 17.661  |
| 12 | 12624812 | 12630506 | 5.694   |
| 12 | 12637062 | 12939164 | 302.102 |
| 12 | 12950246 | 12963983 | 13.737  |
| 12 | 12979759 | 12990408 | 10.649  |
| 12 | 13056437 | 13247685 | 191.248 |
| 12 | 13573757 | 13573764 | 0.007   |
| 12 | 13665434 | 13670245 | 4.811   |
| 12 | 13677617 | 13686162 | 8.545   |
| 12 | 13694429 | 13705490 | 11.061  |
| 12 | 13726404 | 13726447 | 0.043   |
| 12 | 13727671 | 13754836 | 27.165  |
| 12 | 13755048 | 14465304 | 710.256 |
| 12 | 14465319 | 14534507 | 69.188  |
| 12 | 14966952 | 15000661 | 33.709  |
| 12 | 15062901 | 15081512 | 18.611  |
| 12 | 15230200 | 15340281 | 110.081 |
| 12 | 15458625 | 15554025 | 95.4    |
| 12 | 15582424 | 15582432 | 0.008   |
| 12 | 15592450 | 15678453 | 86.003  |
| 12 | 15692738 | 15723464 | 30.726  |
| 12 | 15769102 | 15769126 | 0.024   |
| 12 | 15779857 | 15821952 | 42.095  |
| 12 | 15890650 | 15938045 | 47.395  |
| 12 | 15977971 | 15978038 | 0.067   |
| 12 | 15978045 | 16017170 | 39.125  |
| 12 | 16031757 | 16031964 | 0.207   |
| 12 | 16031972 | 16038632 | 6.66    |
| 12 | 16050138 | 16216950 | 166.812 |
| 12 | 16248227 | 16277091 | 28.864  |
| 12 | 16299226 | 16307618 | 8.392   |
| 12 | 16319996 | 16322929 | 2.933   |
| 12 | 16329277 | 16358279 | 29.002  |
| 12 | 16367998 | 16631127 | 263.129 |
| 12 | 16759732 | 16808565 | 48.833  |
| 12 | 16814413 | 16832213 | 17.8    |
| 12 | 16857817 | 16912345 | 54.528  |
| 12 | 16937097 | 17191735 | 254.638 |
| 12 | 17214850 | 17319750 | 104.9   |
| 12 | 17340210 | 17340383 | 0.173   |
| 12 | 17359797 | 17470960 | 111.163 |
| 12 | 17488444 | 17511411 | 22.967  |
| 12 | 17524433 | 17679014 | 154.581 |
| 12 | 17681623 | 17804217 | 122.594 |
| 12 | 17833918 | 17840457 | 6.539   |
| 12 | 17909497 | 17909555 | 0.058   |
| 12 | 18034728 | 18034744 | 0.016   |
| 12 | 18034753 | 18342583 | 307.83  |
| 12 | 18371309 | 18380923 | 9.614   |
| 12 | 18392243 | 18422845 | 30.602  |
| 12 | 18423895 | 18438711 | 14.816  |

|    |          |          |         |
|----|----------|----------|---------|
| 12 | 18447344 | 18494288 | 46.944  |
| 12 | 18595469 | 18715935 | 120.466 |
| 12 | 18725309 | 18735047 | 9.738   |
| 12 | 18736106 | 18753392 | 17.286  |
| 12 | 18793795 | 18798507 | 4.712   |
| 12 | 18806630 | 18904764 | 98.134  |
| 12 | 18924383 | 18932258 | 7.875   |
| 12 | 18939219 | 18960723 | 21.504  |
| 12 | 19028089 | 19089868 | 61.779  |
| 12 | 19152857 | 19153013 | 0.156   |
| 12 | 19224720 | 19663330 | 438.61  |
| 12 | 19723836 | 19739615 | 15.779  |
| 12 | 19783343 | 19884195 | 100.852 |
| 12 | 19884361 | 19889149 | 4.788   |
| 12 | 19896415 | 19897328 | 0.913   |
| 12 | 19907353 | 19956149 | 48.796  |
| 12 | 19964053 | 20093704 | 129.651 |
| 12 | 20182929 | 20615017 | 432.088 |
| 12 | 20632630 | 20791129 | 158.499 |
| 12 | 21089379 | 21398991 | 309.612 |
| 12 | 21467503 | 21492379 | 24.876  |
| 12 | 21704036 | 21727004 | 22.968  |
| 12 | 21899619 | 22436155 | 536.536 |
| 12 | 22483611 | 22498785 | 15.174  |
| 12 | 22539891 | 22562742 | 22.851  |
| 12 | 22628668 | 22981557 | 352.889 |
| 12 | 23217765 | 23246129 | 28.364  |
| 12 | 23452204 | 23459520 | 7.316   |
| 12 | 23487425 | 23931857 | 444.432 |
| 12 | 23934414 | 23938321 | 3.907   |
| 12 | 23955888 | 24005592 | 49.704  |
| 12 | 24080624 | 24081809 | 1.185   |
| 12 | 24089117 | 24094536 | 5.419   |
| 12 | 24100160 | 24163787 | 63.627  |
| 12 | 24201041 | 24285746 | 84.705  |
| 12 | 24313839 | 24337073 | 23.234  |
| 12 | 24430366 | 24460435 | 30.069  |
| 12 | 24587273 | 24672727 | 85.454  |
| 12 | 24686203 | 24686258 | 0.055   |
| 12 | 24706169 | 24706187 | 0.018   |
| 12 | 24748180 | 24759494 | 11.314  |
| 12 | 24775813 | 24791081 | 15.268  |
| 12 | 24820394 | 24820604 | 0.21    |
| 12 | 24837787 | 24862168 | 24.381  |
| 12 | 24908426 | 25718924 | 810.498 |
| 12 | 25733017 | 25882930 | 149.913 |
| 12 | 26056970 | 26668662 | 611.692 |
| 12 | 26709755 | 26758615 | 48.86   |
| 12 | 28214151 | 28499354 | 285.203 |
| 12 | 28591901 | 28591918 | 0.017   |
| 12 | 29254842 | 29286069 | 31.227  |
| 12 | 29333040 | 29413580 | 80.54   |
| 12 | 29596574 | 29754379 | 157.805 |
| 12 | 30095994 | 30367728 | 271.734 |
| 12 | 30414847 | 30611511 | 196.664 |
| 12 | 30746248 | 31046778 | 300.53  |
| 12 | 31075345 | 31204480 | 129.135 |
| 12 | 31207514 | 31223208 | 15.694  |
| 12 | 31223366 | 31327814 | 104.448 |
| 12 | 31357632 | 31382794 | 25.162  |
| 12 | 31407542 | 31425214 | 17.672  |

|    |          |          |          |
|----|----------|----------|----------|
| 12 | 31445657 | 31531125 | 85.468   |
| 12 | 31546435 | 31599194 | 52.759   |
| 12 | 31610575 | 32095128 | 484.553  |
| 12 | 32455133 | 32579269 | 124.136  |
| 12 | 32588903 | 32589026 | 0.123    |
| 12 | 32605465 | 32609270 | 3.805    |
| 12 | 32637115 | 32655871 | 18.756   |
| 12 | 32662075 | 32770090 | 108.015  |
| 12 | 32788344 | 33748087 | 959.743  |
| 12 | 33797996 | 35147533 | 1349.537 |
| 12 | 35147692 | 35147739 | 0.047    |
| 12 | 35303248 | 35702888 | 399.64   |
| 12 | 35992692 | 36009612 | 16.92    |
| 12 | 36249687 | 36269026 | 19.339   |
| 12 | 36271890 | 36504410 | 232.52   |
| 12 | 36519444 | 36718636 | 199.192  |
| 12 | 36752053 | 36777790 | 25.737   |
| 12 | 36877206 | 36889198 | 11.992   |
| 12 | 37062009 | 37264524 | 202.515  |
| 12 | 37344239 | 37383209 | 38.97    |
| 12 | 37385390 | 37389700 | 4.31     |
| 12 | 37584276 | 37833550 | 249.274  |
| 12 | 37844568 | 37960963 | 116.395  |
| 12 | 37976500 | 38137795 | 161.295  |
| 12 | 38201215 | 38211171 | 9.956    |
| 12 | 38226971 | 38228705 | 1.734    |
| 12 | 38233134 | 38252986 | 19.852   |
| 12 | 38288442 | 38295316 | 6.874    |
| 12 | 38317468 | 38332619 | 15.151   |
| 12 | 38344754 | 38761052 | 416.298  |
| 12 | 38762325 | 38791851 | 29.526   |
| 12 | 38793384 | 38813760 | 20.376   |
| 12 | 38822099 | 38822126 | 0.027    |
| 12 | 38822306 | 38939472 | 117.166  |
| 12 | 38939479 | 38945251 | 5.772    |
| 12 | 38945255 | 39011735 | 66.48    |
| 12 | 39055990 | 39110938 | 54.948   |
| 12 | 39154893 | 39289302 | 134.409  |
| 12 | 39320129 | 39320147 | 0.018    |
| 12 | 39437487 | 39444411 | 6.924    |
| 12 | 39585181 | 39625005 | 39.824   |
| 12 | 39644722 | 39674089 | 29.367   |
| 12 | 39685980 | 39686007 | 0.027    |
| 12 | 39691413 | 39706677 | 15.264   |
| 12 | 39755161 | 39797388 | 42.227   |
| 12 | 39999781 | 40098011 | 98.23    |
| 12 | 40315511 | 40315526 | 0.015    |
| 12 | 40392491 | 40399291 | 6.8      |
| 12 | 40428431 | 40533626 | 105.195  |
| 12 | 40533635 | 41003651 | 470.016  |
| 12 | 41003736 | 41010548 | 6.812    |
| 12 | 41026591 | 41087991 | 61.4     |
| 12 | 41106478 | 41115838 | 9.36     |
| 12 | 41127146 | 41142298 | 15.152   |
| 12 | 41147567 | 41158917 | 11.35    |
| 12 | 41158920 | 41165901 | 6.981    |
| 12 | 41174174 | 41175120 | 0.946    |
| 12 | 41175392 | 41205168 | 29.776   |
| 12 | 41254608 | 42021186 | 766.578  |
| 12 | 42022360 | 42054708 | 32.348   |
| 12 | 42064389 | 42126790 | 62.401   |

|    |          |          |         |
|----|----------|----------|---------|
| 12 | 42327779 | 42445443 | 117.664 |
| 12 | 42468535 | 42621081 | 152.546 |
| 12 | 42669206 | 42705365 | 36.159  |
| 12 | 42719728 | 42746551 | 26.823  |
| 12 | 42804079 | 42823912 | 19.833  |
| 12 | 42823913 | 42907102 | 83.189  |
| 12 | 42931671 | 42965657 | 33.986  |
| 12 | 43034883 | 43050981 | 16.098  |
| 12 | 43063340 | 43092558 | 29.218  |
| 12 | 43569300 | 44347611 | 778.311 |
| 12 | 44351105 | 44568014 | 216.909 |
| 12 | 44691182 | 44761850 | 70.668  |
| 12 | 44780632 | 44831980 | 51.348  |
| 12 | 44846499 | 44856883 | 10.384  |
| 12 | 44856888 | 44879896 | 23.008  |
| 12 | 44977499 | 44977530 | 0.031   |
| 12 | 45024006 | 45050205 | 26.199  |
| 12 | 45081881 | 45194296 | 112.415 |
| 12 | 45194312 | 45201482 | 7.17    |
| 12 | 45218070 | 45343179 | 125.109 |
| 12 | 45414018 | 45528783 | 114.765 |
| 12 | 45536949 | 45537588 | 0.639   |
| 12 | 45554713 | 45573152 | 18.439  |
| 12 | 45573157 | 45582131 | 8.974   |
| 12 | 45622514 | 45640902 | 18.388  |
| 12 | 45645433 | 45906620 | 261.187 |
| 12 | 45912771 | 45928818 | 16.047  |
| 12 | 45934472 | 45938589 | 4.117   |
| 12 | 46083349 | 46103385 | 20.036  |
| 12 | 46128209 | 46317022 | 188.813 |
| 12 | 46317026 | 46317738 | 0.712   |
| 12 | 46339711 | 46351490 | 11.779  |
| 12 | 46353179 | 46368586 | 15.407  |
| 12 | 46465528 | 46467499 | 1.971   |
| 12 | 46475409 | 46489009 | 13.6    |
| 12 | 46489177 | 46532746 | 43.569  |
| 12 | 46550371 | 46550447 | 0.076   |
| 12 | 46563261 | 46563279 | 0.018   |
| 12 | 46604875 | 46604925 | 0.05    |
| 12 | 46605036 | 46605116 | 0.08    |
| 12 | 46605133 | 46605254 | 0.121   |
| 12 | 46613891 | 46613953 | 0.062   |
| 12 | 46613967 | 46618395 | 4.428   |
| 12 | 46628272 | 46723779 | 95.507  |
| 12 | 46725823 | 46725843 | 0.02    |
| 12 | 46725874 | 46931037 | 205.163 |
| 12 | 46958594 | 47016188 | 57.594  |
| 12 | 47044278 | 47044636 | 0.358   |
| 12 | 47071199 | 47073787 | 2.588   |
| 12 | 47101854 | 47127348 | 25.494  |
| 12 | 47187754 | 47203445 | 15.691  |
| 12 | 47231466 | 47233871 | 2.405   |
| 12 | 47259601 | 47275327 | 15.726  |
| 12 | 47289357 | 47395726 | 106.369 |
| 12 | 47395851 | 47398927 | 3.076   |
| 12 | 47398928 | 47403658 | 4.73    |
| 12 | 47406553 | 47419285 | 12.732  |
| 12 | 47419447 | 47640216 | 220.769 |
| 12 | 47640509 | 47647851 | 7.342   |
| 12 | 47651594 | 47658623 | 7.029   |
| 12 | 47662826 | 47724852 | 62.026  |

|    |          |          |         |
|----|----------|----------|---------|
| 12 | 47739218 | 47739250 | 0.032   |
| 12 | 47749751 | 47755837 | 6.086   |
| 12 | 47804772 | 47842567 | 37.795  |
| 12 | 47871105 | 47941645 | 70.54   |
| 12 | 47952505 | 47969049 | 16.544  |
| 12 | 48037226 | 48041155 | 3.929   |
| 12 | 48062088 | 48074580 | 12.492  |
| 12 | 48076135 | 48104252 | 28.117  |
| 12 | 48109862 | 48109915 | 0.053   |
| 12 | 48114312 | 48152684 | 38.372  |
| 12 | 48160126 | 48201194 | 41.068  |
| 12 | 48227229 | 48336111 | 108.882 |
| 12 | 48465507 | 48528569 | 63.062  |
| 12 | 48543642 | 48543650 | 0.008   |
| 12 | 48543695 | 48543716 | 0.021   |
| 12 | 48543804 | 48547935 | 4.131   |
| 12 | 48548081 | 48616486 | 68.405  |
| 12 | 48616492 | 49131892 | 515.4   |
| 12 | 49135309 | 49139365 | 4.056   |
| 12 | 49144800 | 49224661 | 79.861  |
| 12 | 49242506 | 49267044 | 24.538  |
| 12 | 49352637 | 49526063 | 173.426 |
| 12 | 49526324 | 49622446 | 96.122  |
| 12 | 49625162 | 49671442 | 46.28   |
| 12 | 49678622 | 49713179 | 34.557  |
| 12 | 49713597 | 49871452 | 157.855 |
| 12 | 49874801 | 49917334 | 42.533  |
| 12 | 49931243 | 49964702 | 33.459  |
| 12 | 50008974 | 50026535 | 17.561  |
| 12 | 50380986 | 50503347 | 122.361 |
| 12 | 50510797 | 50521379 | 10.582  |
| 12 | 50535159 | 50581774 | 46.615  |
| 12 | 50624706 | 50645722 | 21.016  |
| 12 | 50780136 | 50862171 | 82.035  |
| 12 | 50876620 | 50882873 | 6.253   |
| 12 | 50932322 | 51102229 | 169.907 |
| 12 | 51220653 | 51442646 | 221.993 |
| 12 | 51482772 | 51482952 | 0.18    |
| 12 | 51520643 | 51522047 | 1.404   |
| 12 | 51564956 | 51564961 | 0.005   |
| 12 | 51575629 | 51579161 | 3.532   |
| 12 | 51579885 | 51586595 | 6.71    |
| 12 | 51594480 | 51655410 | 60.93   |
| 12 | 51670717 | 51699731 | 29.014  |
| 12 | 51703871 | 51733194 | 29.323  |
| 12 | 51773232 | 51775187 | 1.955   |
| 12 | 51862229 | 51913647 | 51.418  |
| 12 | 51922453 | 51937521 | 15.068  |
| 12 | 51941338 | 51941527 | 0.189   |
| 12 | 51943301 | 51964812 | 21.511  |
| 12 | 51993650 | 51998150 | 4.5     |
| 12 | 52005029 | 52006724 | 1.695   |
| 12 | 52060526 | 52135549 | 75.023  |
| 12 | 52149120 | 52162698 | 13.578  |
| 12 | 52282170 | 52340601 | 58.431  |
| 12 | 52401285 | 52444137 | 42.852  |
| 12 | 52444141 | 52444157 | 0.016   |
| 12 | 52447620 | 52594347 | 146.727 |
| 12 | 52598114 | 52608273 | 10.159  |
| 12 | 52692310 | 52758961 | 66.651  |
| 12 | 52765253 | 52780433 | 15.18   |

|    |          |          |         |
|----|----------|----------|---------|
| 12 | 52780442 | 52780823 | 0.381   |
| 12 | 52899264 | 53022518 | 123.254 |
| 12 | 53022527 | 53037647 | 15.12   |
| 12 | 53038972 | 53098440 | 59.468  |
| 12 | 53098685 | 53215900 | 117.215 |
| 12 | 53245191 | 53578050 | 332.859 |
| 12 | 53581135 | 53601860 | 20.725  |
| 12 | 53602891 | 53602900 | 0.009   |
| 12 | 53839610 | 54139884 | 300.274 |
| 12 | 54156455 | 54156483 | 0.028   |
| 12 | 54213591 | 54253849 | 40.258  |
| 12 | 54269212 | 54330624 | 61.412  |
| 12 | 54340017 | 54364615 | 24.598  |
| 12 | 54371010 | 54373151 | 2.141   |
| 12 | 54373276 | 54420272 | 46.996  |
| 12 | 54476909 | 54672607 | 195.698 |
| 12 | 54767924 | 54767951 | 0.027   |
| 12 | 54801586 | 54801610 | 0.024   |
| 12 | 54841176 | 54841360 | 0.184   |
| 12 | 54918838 | 54943437 | 24.599  |
| 12 | 54948838 | 54956354 | 7.516   |
| 12 | 54956364 | 54975263 | 18.899  |
| 12 | 54997858 | 55005631 | 7.773   |
| 12 | 55085871 | 55093997 | 8.126   |
| 12 | 55324534 | 55335093 | 10.559  |
| 12 | 55335171 | 55338119 | 2.948   |
| 12 | 55378151 | 55378607 | 0.456   |
| 12 | 55387992 | 55401796 | 13.804  |
| 12 | 55744078 | 55746043 | 1.965   |
| 12 | 55856537 | 55863696 | 7.159   |
| 12 | 55863724 | 55886994 | 23.27   |
| 12 | 55906868 | 55923917 | 17.049  |
| 12 | 56060511 | 56079054 | 18.543  |
| 12 | 56158411 | 56172527 | 14.116  |
| 12 | 56184047 | 56243791 | 59.744  |
| 12 | 56249631 | 56278847 | 29.216  |
| 12 | 56285373 | 56361013 | 75.64   |
| 12 | 56375124 | 56385214 | 10.09   |
| 12 | 56398158 | 56518085 | 119.927 |
| 12 | 56555783 | 56555978 | 0.195   |
| 12 | 56558608 | 56568475 | 9.867   |
| 12 | 56577005 | 56578575 | 1.57    |
| 12 | 56587752 | 56587761 | 0.009   |
| 12 | 56587762 | 56597043 | 9.281   |
| 12 | 56628822 | 56628850 | 0.028   |
| 12 | 56689147 | 56770589 | 81.442  |
| 12 | 56770693 | 56770756 | 0.063   |
| 12 | 56785415 | 56791759 | 6.344   |
| 12 | 56856534 | 56865755 | 9.221   |
| 12 | 56875301 | 56875573 | 0.272   |
| 12 | 56885801 | 56947849 | 62.048  |
| 12 | 56947863 | 56949970 | 2.107   |
| 12 | 57035103 | 57060980 | 25.877  |
| 12 | 57066259 | 57133414 | 67.155  |
| 12 | 57147656 | 57158649 | 10.993  |
| 12 | 57169430 | 57182256 | 12.826  |
| 12 | 57193607 | 57195510 | 1.903   |
| 12 | 57202186 | 57204631 | 2.445   |
| 12 | 57256933 | 57329080 | 72.147  |
| 12 | 57364126 | 57369336 | 5.21    |
| 12 | 57377285 | 57385228 | 7.943   |

|    |          |          |         |
|----|----------|----------|---------|
| 13 | 52489    | 132124   | 79.635  |
| 13 | 233268   | 558403   | 325.135 |
| 13 | 558409   | 653912   | 95.503  |
| 13 | 754376   | 908094   | 153.718 |
| 13 | 936925   | 1476301  | 539.376 |
| 13 | 1579650  | 1736057  | 156.407 |
| 13 | 1747241  | 1996519  | 249.278 |
| 13 | 2007742  | 2524326  | 516.584 |
| 13 | 2689475  | 3140069  | 450.594 |
| 13 | 3192252  | 3368562  | 176.31  |
| 13 | 4250297  | 4404066  | 153.769 |
| 13 | 4404098  | 4404156  | 0.058   |
| 13 | 4405193  | 4797116  | 391.923 |
| 13 | 5020242  | 5050726  | 30.484  |
| 13 | 5390712  | 5722453  | 331.741 |
| 13 | 5797112  | 6758342  | 961.23  |
| 13 | 7026997  | 7134794  | 107.797 |
| 13 | 7192237  | 7192253  | 0.016   |
| 13 | 7324680  | 7347702  | 23.022  |
| 13 | 7416527  | 7837741  | 421.214 |
| 13 | 8001181  | 8047618  | 46.437  |
| 13 | 8053598  | 8195082  | 141.484 |
| 13 | 8440022  | 9050303  | 610.281 |
| 13 | 9054706  | 9067341  | 12.635  |
| 13 | 9134784  | 9242713  | 107.929 |
| 13 | 9323493  | 9432957  | 109.464 |
| 13 | 9473886  | 9487054  | 13.168  |
| 13 | 9491790  | 9528768  | 36.978  |
| 13 | 9528772  | 9528791  | 0.019   |
| 13 | 9588771  | 9666979  | 78.208  |
| 13 | 9722567  | 9723201  | 0.634   |
| 13 | 9723431  | 9724730  | 1.299   |
| 13 | 9725141  | 9850904  | 125.763 |
| 13 | 9877726  | 9877754  | 0.028   |
| 13 | 10050661 | 10209860 | 159.199 |
| 13 | 10236350 | 10251723 | 15.373  |
| 13 | 10279729 | 10279895 | 0.166   |
| 13 | 10320580 | 10331360 | 10.78   |
| 13 | 10538123 | 10591704 | 53.581  |
| 13 | 10869260 | 10884811 | 15.551  |
| 13 | 10942435 | 11006675 | 64.24   |
| 13 | 11057025 | 11352625 | 295.6   |
| 13 | 11397607 | 11675101 | 277.494 |
| 13 | 11735272 | 11750279 | 15.007  |
| 13 | 11769242 | 11791101 | 21.859  |
| 13 | 11840375 | 11840406 | 0.031   |
| 13 | 11982016 | 12535477 | 553.461 |
| 13 | 12553530 | 12553549 | 0.019   |
| 13 | 12776820 | 12830367 | 53.547  |
| 13 | 12906772 | 12936578 | 29.806  |
| 13 | 12971267 | 13705537 | 734.27  |
| 13 | 13800592 | 13836571 | 35.979  |
| 13 | 14271551 | 14379686 | 108.135 |
| 13 | 14483783 | 14548294 | 64.511  |
| 13 | 14555612 | 14809344 | 253.732 |
| 13 | 14875909 | 14877158 | 1.249   |
| 13 | 15030941 | 15046067 | 15.126  |
| 13 | 15092441 | 15295811 | 203.37  |
| 13 | 15321743 | 15321758 | 0.015   |
| 13 | 15335527 | 15335561 | 0.034   |
| 13 | 15367710 | 15409523 | 41.813  |



|    |          |          |         |
|----|----------|----------|---------|
| 13 | 15636455 | 15636955 | 0.5     |
| 13 | 15686050 | 15686064 | 0.014   |
| 13 | 15769434 | 15881908 | 112.474 |
| 13 | 15884242 | 15934038 | 49.796  |
| 13 | 15995004 | 16114191 | 119.187 |
| 13 | 16702233 | 16729387 | 27.154  |
| 13 | 16757633 | 16757650 | 0.017   |
| 13 | 16855879 | 17734034 | 878.155 |
| 13 | 17802733 | 17858663 | 55.93   |
| 13 | 17884622 | 18067487 | 182.865 |
| 13 | 18119321 | 18155043 | 35.722  |
| 13 | 18183595 | 18381598 | 198.003 |
| 13 | 18392147 | 18452265 | 60.118  |
| 13 | 18481970 | 18566418 | 84.448  |
| 13 | 18647180 | 18684649 | 37.469  |
| 13 | 18730437 | 19057112 | 326.675 |
| 13 | 19145251 | 19269738 | 124.487 |
| 13 | 19347533 | 19375264 | 27.731  |
| 13 | 19413679 | 19515104 | 101.425 |
| 13 | 19717953 | 19717965 | 0.012   |
| 13 | 19738101 | 19757050 | 18.949  |
| 13 | 19769462 | 19819590 | 50.128  |
| 13 | 19819599 | 20097035 | 277.436 |
| 13 | 20230882 | 20351723 | 120.841 |
| 13 | 20359037 | 20425402 | 66.365  |
| 13 | 20472273 | 20755595 | 283.322 |
| 13 | 20809259 | 20958199 | 148.94  |
| 13 | 21039778 | 21452277 | 412.499 |
| 13 | 21584695 | 21628748 | 44.053  |
| 13 | 21631668 | 21631747 | 0.079   |
| 13 | 21653682 | 21670832 | 17.15   |
| 13 | 21678236 | 21700720 | 22.484  |
| 13 | 21704146 | 21776942 | 72.796  |
| 13 | 21805801 | 21844273 | 38.472  |
| 13 | 21855577 | 21855583 | 0.006   |
| 13 | 21863206 | 21879693 | 16.487  |
| 13 | 21944868 | 21992538 | 47.67   |
| 13 | 22059780 | 22091788 | 32.008  |
| 13 | 22123868 | 22165425 | 41.557  |
| 13 | 22221267 | 22451091 | 229.824 |
| 13 | 22452907 | 22469777 | 16.87   |
| 13 | 22482909 | 22487607 | 4.698   |
| 13 | 22549836 | 22796579 | 246.743 |
| 13 | 22796688 | 22971203 | 174.515 |
| 13 | 23001080 | 23331142 | 330.062 |
| 13 | 23331157 | 23334385 | 3.228   |
| 13 | 23436297 | 23498009 | 61.712  |
| 13 | 23498036 | 23702522 | 204.486 |
| 13 | 23712241 | 23898855 | 186.614 |
| 13 | 24098728 | 24131307 | 32.579  |
| 13 | 24155312 | 24264399 | 109.087 |
| 13 | 24266172 | 24266720 | 0.548   |
| 13 | 24266733 | 24267312 | 0.579   |
| 13 | 24267318 | 24273627 | 6.309   |
| 13 | 24283882 | 24294144 | 10.262  |
| 13 | 24302381 | 24555160 | 252.779 |
| 13 | 24572942 | 24672932 | 99.99   |
| 13 | 24702216 | 24774169 | 71.953  |
| 13 | 24774297 | 24785160 | 10.863  |
| 13 | 24786585 | 24840755 | 54.17   |
| 13 | 24926430 | 25027858 | 101.428 |

|    |          |          |         |
|----|----------|----------|---------|
| 13 | 25064106 | 25916505 | 852.399 |
| 13 | 25919403 | 25923897 | 4.494   |
| 13 | 25923954 | 25930759 | 6.805   |
| 13 | 25999575 | 26005952 | 6.377   |
| 13 | 26035357 | 26044613 | 9.256   |
| 13 | 26044733 | 26044740 | 0.007   |
| 13 | 26045209 | 26045324 | 0.115   |
| 13 | 26045549 | 26045863 | 0.314   |
| 13 | 26045987 | 26048691 | 2.704   |
| 13 | 26083139 | 26107262 | 24.123  |
| 13 | 26111105 | 26111133 | 0.028   |
| 13 | 26128953 | 26177648 | 48.695  |
| 13 | 26183584 | 26185155 | 1.571   |
| 13 | 26192615 | 26241671 | 49.056  |
| 13 | 26241848 | 26396755 | 154.907 |
| 13 | 26499874 | 26752747 | 252.873 |
| 13 | 26770268 | 26841201 | 70.933  |
| 13 | 26876006 | 26971258 | 95.252  |
| 13 | 26971272 | 26984458 | 13.186  |
| 13 | 26992666 | 27003821 | 11.155  |
| 13 | 27171068 | 27381907 | 210.839 |
| 13 | 27384996 | 27416247 | 31.251  |
| 13 | 27447783 | 27494474 | 46.691  |
| 13 | 27507298 | 27521940 | 14.642  |
| 13 | 27550256 | 27701965 | 151.709 |
| 13 | 27707868 | 27721127 | 13.259  |
| 13 | 27755451 | 27790272 | 34.821  |
| 13 | 28150958 | 28751786 | 600.828 |
| 13 | 28801013 | 28804997 | 3.984   |
| 13 | 28860941 | 28906042 | 45.101  |
| 13 | 28959358 | 28965108 | 5.75    |
| 13 | 28965671 | 29122198 | 156.527 |
| 13 | 29138572 | 29155026 | 16.454  |
| 13 | 29191497 | 29196839 | 5.342   |
| 13 | 29210472 | 29222016 | 11.544  |
| 13 | 29239568 | 29291696 | 52.128  |
| 13 | 29490058 | 29496909 | 6.851   |
| 13 | 29522096 | 29570242 | 48.146  |
| 13 | 29585565 | 29594692 | 9.127   |
| 13 | 29601896 | 29886433 | 284.537 |
| 13 | 29917774 | 29950914 | 33.14   |
| 13 | 30036230 | 30397685 | 361.455 |
| 13 | 30628026 | 30990140 | 362.114 |
| 13 | 31019328 | 31297500 | 278.172 |
| 13 | 31421884 | 31451529 | 29.645  |
| 13 | 31467233 | 31467253 | 0.02    |
| 13 | 31504808 | 31504845 | 0.037   |
| 13 | 31515411 | 31864452 | 349.041 |
| 13 | 32151167 | 32357490 | 206.323 |
| 13 | 32413339 | 32485555 | 72.216  |
| 13 | 32696089 | 33634829 | 938.74  |
| 13 | 33634849 | 33710758 | 75.909  |
| 13 | 33837513 | 33878254 | 40.741  |
| 13 | 33906482 | 33981886 | 75.404  |
| 13 | 34423481 | 34512401 | 88.92   |
| 13 | 34512407 | 34640940 | 128.533 |
| 13 | 34673224 | 35002758 | 329.534 |
| 13 | 35071774 | 35283139 | 211.365 |
| 13 | 35717168 | 35757539 | 40.371  |
| 13 | 37354619 | 38152417 | 797.798 |
| 13 | 38272460 | 38570632 | 298.172 |

|    |          |          |          |
|----|----------|----------|----------|
| 13 | 38570648 | 39147183 | 576.535  |
| 13 | 39213153 | 39217511 | 4.358    |
| 13 | 39230003 | 39492686 | 262.683  |
| 13 | 39688261 | 39713550 | 25.289   |
| 13 | 39935694 | 39939868 | 4.174    |
| 13 | 40085526 | 40304861 | 219.335  |
| 13 | 40304872 | 40725956 | 421.084  |
| 13 | 41196871 | 42465605 | 1268.734 |
| 13 | 42510694 | 42615631 | 104.937  |
| 13 | 42866407 | 42932896 | 66.489   |
| 13 | 43061613 | 43611098 | 549.485  |
| 13 | 43879246 | 44300699 | 421.453  |
| 13 | 44481003 | 44866622 | 385.619  |
| 13 | 45075284 | 45082629 | 7.345    |
| 13 | 45109350 | 45308963 | 199.613  |
| 13 | 45315357 | 45342667 | 27.31    |
| 13 | 45380058 | 45438728 | 58.67    |
| 13 | 45449393 | 45499343 | 49.95    |
| 13 | 45572303 | 46058684 | 486.381  |
| 13 | 46116852 | 46116867 | 0.015    |
| 13 | 46171060 | 46191223 | 20.163   |
| 13 | 46305165 | 46310471 | 5.306    |
| 13 | 46405724 | 46461277 | 55.553   |
| 13 | 47235537 | 47466793 | 231.256  |
| 13 | 47562800 | 48052665 | 489.865  |
| 13 | 48204796 | 48651187 | 446.391  |
| 13 | 48971276 | 50145592 | 1174.316 |
| 13 | 50201507 | 50722021 | 520.514  |
| 13 | 51343255 | 51385203 | 41.948   |
| 13 | 51595071 | 51632227 | 37.156   |
| 13 | 51881121 | 51899053 | 17.932   |
| 13 | 52137303 | 52137343 | 0.04     |
| 13 | 52437601 | 52754980 | 317.379  |
| 13 | 52772850 | 53167223 | 394.373  |
| 13 | 53190212 | 53198060 | 7.848    |
| 13 | 53364769 | 53717630 | 352.861  |
| 13 | 53891739 | 54076480 | 184.741  |
| 13 | 54142538 | 54142727 | 0.189    |
| 13 | 54211586 | 54380154 | 168.568  |
| 13 | 54425285 | 54425477 | 0.192    |
| 13 | 54489472 | 54581546 | 92.074   |
| 13 | 54685640 | 55439715 | 754.075  |
| 13 | 55439717 | 55549954 | 110.237  |
| 13 | 55646335 | 55706378 | 60.043   |
| 13 | 55706526 | 55981877 | 275.351  |
| 13 | 55981881 | 56058553 | 76.672   |
| 13 | 56137071 | 56266660 | 129.589  |
| 13 | 56330106 | 56389642 | 59.536   |
| 13 | 56393014 | 56420697 | 27.683   |
| 13 | 56423497 | 56918883 | 495.386  |
| 13 | 56936873 | 57047192 | 110.319  |
| 13 | 57047283 | 57076725 | 29.442   |
| 13 | 57108342 | 57338847 | 230.505  |
| 13 | 57372528 | 57382691 | 10.163   |
| 13 | 57480352 | 57559074 | 78.722   |
| 13 | 57634147 | 57720619 | 86.472   |
| 13 | 57765122 | 58001530 | 236.408  |
| 13 | 58080785 | 58251318 | 170.533  |
| 13 | 58278419 | 58279141 | 0.722    |
| 13 | 58301991 | 58331719 | 29.728   |
| 13 | 58334008 | 58341532 | 7.524    |

|    |          |          |          |
|----|----------|----------|----------|
| 13 | 58363679 | 58596838 | 233.159  |
| 13 | 58617169 | 58639224 | 22.055   |
| 13 | 58784572 | 58846037 | 61.465   |
| 13 | 58859068 | 58874690 | 15.622   |
| 13 | 58941142 | 58947506 | 6.364    |
| 13 | 58977993 | 59087644 | 109.651  |
| 13 | 59116538 | 59118731 | 2.193    |
| 13 | 59135327 | 59152393 | 17.066   |
| 13 | 59196921 | 59335478 | 138.557  |
| 13 | 59426203 | 59581675 | 155.472  |
| 13 | 59621004 | 59652090 | 31.086   |
| 13 | 59664028 | 59689948 | 25.92    |
| 13 | 59779106 | 59905990 | 126.884  |
| 13 | 59967024 | 60028630 | 61.606   |
| 13 | 60030023 | 60074037 | 44.014   |
| 13 | 60193470 | 60251796 | 58.326   |
| 13 | 60265206 | 60666536 | 401.33   |
| 13 | 60669784 | 60723957 | 54.173   |
| 13 | 60974078 | 61027969 | 53.891   |
| 13 | 61166488 | 61193332 | 26.844   |
| 13 | 61209221 | 61280810 | 71.589   |
| 13 | 61354355 | 61533308 | 178.953  |
| 13 | 61588058 | 61711866 | 123.808  |
| 13 | 61874486 | 62059137 | 184.651  |
| 13 | 62068351 | 62120667 | 52.316   |
| 13 | 62159094 | 62189019 | 29.925   |
| 13 | 62195297 | 62198525 | 3.228    |
| 13 | 62335017 | 62371953 | 36.936   |
| 13 | 62438211 | 62491529 | 53.318   |
| 13 | 62545446 | 62624805 | 79.359   |
| 13 | 62639978 | 62658903 | 18.925   |
| 13 | 62914396 | 63657028 | 742.632  |
| 13 | 63740284 | 64520836 | 780.552  |
| 13 | 64735189 | 64813796 | 78.607   |
| 13 | 64822736 | 65008779 | 186.043  |
| 13 | 65008822 | 65011559 | 2.737    |
| 13 | 65011683 | 65022554 | 10.871   |
| 13 | 65089920 | 65110290 | 20.37    |
| 13 | 65134172 | 65135589 | 1.417    |
| 13 | 65238028 | 65462604 | 224.576  |
| 13 | 65521525 | 65521840 | 0.315    |
| 13 | 65560880 | 65716171 | 155.291  |
| 13 | 65743995 | 66006158 | 262.163  |
| 13 | 66085123 | 66130560 | 45.437   |
| 13 | 66167079 | 66275941 | 108.862  |
| 13 | 66280775 | 66418811 | 138.036  |
| 13 | 66502993 | 66687895 | 184.902  |
| 13 | 66742457 | 67154874 | 412.417  |
| 13 | 67326044 | 67902776 | 576.732  |
| 13 | 67935687 | 68345197 | 409.51   |
| 13 | 68590915 | 68635289 | 44.374   |
| 13 | 68795690 | 70753874 | 1958.184 |
| 13 | 71490435 | 72421942 | 931.507  |
| 13 | 73142106 | 73830662 | 688.556  |
| 13 | 73915343 | 73935930 | 20.587   |
| 13 | 74022519 | 74100310 | 77.791   |
| 13 | 74690759 | 75081977 | 391.218  |
| 13 | 75298334 | 76562320 | 1263.986 |
| 13 | 76629135 | 76795554 | 166.419  |
| 13 | 77139588 | 77653281 | 513.693  |
| 13 | 77693576 | 77693579 | 0.003    |

|    |           |           |          |
|----|-----------|-----------|----------|
| 13 | 77771615  | 77878656  | 107.041  |
| 13 | 78043810  | 78074778  | 30.968   |
| 13 | 78140464  | 78347254  | 206.79   |
| 13 | 78533208  | 78547992  | 14.784   |
| 13 | 78601381  | 78983000  | 381.619  |
| 13 | 78983017  | 79010325  | 27.308   |
| 13 | 79563605  | 79737305  | 173.7    |
| 13 | 81892177  | 82680351  | 788.174  |
| 13 | 82779176  | 82850295  | 71.119   |
| 13 | 83040573  | 83277370  | 236.797  |
| 13 | 83401953  | 83584544  | 182.591  |
| 13 | 83931112  | 84272688  | 341.576  |
| 13 | 84307242  | 84372002  | 64.76    |
| 13 | 84422748  | 85801906  | 1379.158 |
| 13 | 88027546  | 89107665  | 1080.119 |
| 13 | 89639346  | 91565099  | 1925.753 |
| 13 | 91701493  | 92517416  | 815.923  |
| 13 | 92545847  | 92692096  | 146.249  |
| 13 | 92693077  | 92703442  | 10.365   |
| 13 | 92724840  | 92731978  | 7.138    |
| 13 | 93091453  | 93127860  | 36.407   |
| 13 | 93211628  | 93497004  | 285.376  |
| 13 | 93716473  | 93759757  | 43.284   |
| 13 | 93803257  | 94380479  | 577.222  |
| 13 | 94389654  | 94462103  | 72.449   |
| 13 | 94606705  | 94652915  | 46.21    |
| 13 | 94652940  | 94976336  | 323.396  |
| 13 | 95108549  | 95134490  | 25.941   |
| 13 | 95150321  | 95188842  | 38.521   |
| 13 | 95236120  | 96316967  | 1080.847 |
| 13 | 97422475  | 98567226  | 1144.751 |
| 13 | 98589744  | 99129816  | 540.072  |
| 13 | 99168747  | 99168767  | 0.02     |
| 13 | 99233283  | 99530965  | 297.682  |
| 13 | 99656833  | 99816255  | 159.422  |
| 13 | 99835034  | 99934630  | 99.596   |
| 13 | 100005094 | 100366161 | 361.067  |
| 13 | 100383376 | 100383418 | 0.042    |
| 13 | 100503298 | 100879778 | 376.48   |
| 13 | 100908988 | 100913445 | 4.457    |
| 13 | 101058766 | 101058943 | 0.177    |
| 13 | 101086443 | 101784694 | 698.251  |
| 13 | 101871770 | 101931637 | 59.867   |
| 13 | 101996449 | 102089085 | 92.636   |
| 13 | 102094649 | 102548622 | 453.973  |
| 13 | 102674387 | 102823552 | 149.165  |
| 13 | 102833723 | 103056247 | 222.524  |
| 13 | 103145864 | 103431743 | 285.879  |
| 13 | 103465613 | 103511600 | 45.987   |
| 13 | 103568665 | 103917456 | 348.791  |
| 13 | 104047360 | 104436141 | 388.781  |
| 13 | 104675207 | 104703553 | 28.346   |
| 13 | 106548910 | 107949745 | 1400.835 |
| 13 | 108169575 | 108734915 | 565.34   |
| 13 | 108849228 | 109331867 | 482.639  |
| 13 | 109337701 | 109802628 | 464.927  |
| 13 | 110936802 | 112437601 | 1500.799 |
| 13 | 112626028 | 112844810 | 218.782  |
| 13 | 112957720 | 113224286 | 266.566  |
| 13 | 113224981 | 113225006 | 0.025    |
| 13 | 113415711 | 113834940 | 419.229  |

|    |           |           |          |
|----|-----------|-----------|----------|
| 13 | 115253420 | 116935227 | 1681.807 |
| 13 | 117771497 | 118533297 | 761.8    |
| 13 | 118650810 | 118650819 | 0.009    |
| 13 | 118668707 | 118723692 | 54.985   |
| 13 | 118724252 | 118738713 | 14.461   |
| 13 | 118738768 | 118805607 | 66.839   |
| 13 | 118839081 | 118850882 | 11.801   |
| 13 | 118854724 | 118885826 | 31.102   |
| 13 | 118885832 | 118885885 | 0.053    |
| 13 | 118887314 | 118887331 | 0.017    |
| 13 | 118889318 | 119087918 | 198.6    |
| 13 | 119089680 | 119089717 | 0.037    |
| 13 | 119092365 | 119092376 | 0.011    |
| 13 | 119102262 | 119162093 | 59.831   |
| 13 | 119198235 | 119198357 | 0.122    |
| 13 | 119198739 | 120178506 | 979.767  |
| 13 | 120836715 | 121789322 | 952.607  |
| 13 | 121831704 | 122311783 | 480.079  |
| 13 | 122719179 | 122729511 | 10.332   |
| 13 | 123370136 | 124806087 | 1435.951 |
| 13 | 124923707 | 124957018 | 33.311   |
| 13 | 124981781 | 126699972 | 1718.191 |
| 13 | 127464148 | 127708670 | 244.522  |
| 13 | 127967639 | 128515706 | 548.067  |
| 13 | 128678864 | 129425052 | 746.188  |
| 13 | 129488457 | 130405244 | 916.787  |
| 13 | 133468530 | 135195526 | 1726.996 |
| 13 | 135334873 | 135388158 | 53.285   |
| 13 | 135443509 | 135539081 | 95.572   |
| 13 | 135600300 | 135821045 | 220.745  |
| 13 | 135826762 | 135826917 | 0.155    |
| 13 | 135936006 | 136083597 | 147.591  |
| 13 | 136157705 | 136241054 | 83.349   |
| 13 | 136352390 | 136475080 | 122.69   |
| 13 | 136754503 | 136783787 | 29.284   |
| 13 | 136783820 | 136912645 | 128.825  |
| 13 | 136920161 | 136956925 | 36.764   |
| 13 | 137331143 | 137342877 | 11.734   |
| 13 | 137417240 | 137999788 | 582.548  |
| 13 | 138086675 | 138135451 | 48.776   |
| 13 | 138154235 | 138256601 | 102.366  |
| 13 | 138311999 | 138686088 | 374.089  |
| 13 | 138759009 | 138812816 | 53.807   |
| 13 | 138838287 | 139054347 | 216.06   |
| 13 | 139054411 | 139054915 | 0.504    |
| 13 | 139278687 | 139729714 | 451.027  |
| 13 | 139811023 | 139841914 | 30.891   |
| 13 | 139841931 | 139846054 | 4.123    |
| 13 | 139873279 | 139873456 | 0.177    |
| 13 | 139879741 | 139912366 | 32.625   |
| 13 | 139913478 | 140090997 | 177.519  |
| 13 | 140103543 | 140198671 | 95.128   |
| 13 | 140252374 | 140364833 | 112.459  |
| 13 | 140375089 | 140507620 | 132.531  |
| 13 | 140521131 | 140671580 | 150.449  |
| 13 | 140684769 | 140691647 | 6.878    |
| 13 | 140746880 | 140863982 | 117.102  |
| 13 | 140960063 | 140980871 | 20.808   |
| 13 | 141070092 | 141138812 | 68.72    |
| 13 | 141631795 | 141637416 | 5.621    |
| 13 | 141702481 | 141933929 | 231.448  |

|    |           |           |         |
|----|-----------|-----------|---------|
| 13 | 141963042 | 142024916 | 61.874  |
| 13 | 142038144 | 142105048 | 66.904  |
| 13 | 142105517 | 142105875 | 0.358   |
| 13 | 142125908 | 142162131 | 36.223  |
| 13 | 142162133 | 142165610 | 3.477   |
| 13 | 142166370 | 142232777 | 66.407  |
| 13 | 142285878 | 142336898 | 51.02   |
| 13 | 142432395 | 142443105 | 10.71   |
| 13 | 142525050 | 142543046 | 17.996  |
| 13 | 142551814 | 142637858 | 86.044  |
| 13 | 142689273 | 142689760 | 0.487   |
| 13 | 142721244 | 142887851 | 166.607 |
| 13 | 142913331 | 142914038 | 0.707   |
| 13 | 142928847 | 142934753 | 5.906   |
| 13 | 143037013 | 143152637 | 115.624 |
| 13 | 143156846 | 143161564 | 4.718   |
| 13 | 143164363 | 143264861 | 100.498 |
| 13 | 143264866 | 143264899 | 0.033   |
| 13 | 143349014 | 143353671 | 4.657   |
| 13 | 143355545 | 143413193 | 57.648  |
| 13 | 143438742 | 143566964 | 128.222 |
| 13 | 143611627 | 143924262 | 312.635 |
| 13 | 144092508 | 144156488 | 63.98   |
| 13 | 144164873 | 144164889 | 0.016   |
| 13 | 144165095 | 144180208 | 15.113  |
| 13 | 144204446 | 144269542 | 65.096  |
| 13 | 144269551 | 144273411 | 3.86    |
| 13 | 144281416 | 144300791 | 19.375  |
| 13 | 144320443 | 144360949 | 40.506  |
| 13 | 144393516 | 144430916 | 37.4    |
| 13 | 144430949 | 144451841 | 20.892  |
| 13 | 144451855 | 144468882 | 17.027  |
| 13 | 144484428 | 144521489 | 37.061  |
| 13 | 144543184 | 144545731 | 2.547   |
| 13 | 144561721 | 144741195 | 179.474 |
| 13 | 144794169 | 144851837 | 57.668  |
| 13 | 144899026 | 144906175 | 7.149   |
| 13 | 144955915 | 144955948 | 0.033   |
| 13 | 144956138 | 144956151 | 0.013   |
| 13 | 144982333 | 145056107 | 73.774  |
| 13 | 145062443 | 145209070 | 146.627 |
| 13 | 145213936 | 145224246 | 10.31   |
| 14 | 3025      | 3718      | 0.693   |
| 14 | 8374      | 9639      | 1.265   |
| 14 | 13922     | 13957     | 0.035   |
| 14 | 67830     | 645769    | 577.939 |
| 14 | 681531    | 747211    | 65.68   |
| 14 | 758726    | 1097743   | 339.017 |
| 14 | 1113662   | 1229115   | 115.453 |
| 14 | 1274439   | 1421819   | 147.38  |
| 14 | 1421847   | 1427190   | 5.343   |
| 14 | 1489136   | 1524107   | 34.971  |
| 14 | 1578181   | 1646077   | 67.896  |
| 14 | 1649731   | 1667863   | 18.132  |
| 14 | 1686199   | 1699456   | 13.257  |
| 14 | 1707199   | 1787699   | 80.5    |
| 14 | 1799853   | 1941543   | 141.69  |
| 14 | 1949336   | 2353535   | 404.199 |
| 14 | 2618618   | 2663962   | 45.344  |
| 14 | 2686057   | 2772857   | 86.8    |
| 14 | 2776691   | 2804376   | 27.685  |

|    |         |         |         |
|----|---------|---------|---------|
| 14 | 2816458 | 3039115 | 222.657 |
| 14 | 3171145 | 3180380 | 9.235   |
| 14 | 3210748 | 3314792 | 104.044 |
| 14 | 3314810 | 3360960 | 46.15   |
| 14 | 3380644 | 3560619 | 179.975 |
| 14 | 3717694 | 3777889 | 60.195  |
| 14 | 3838753 | 4097917 | 259.164 |
| 14 | 4577330 | 4744061 | 166.731 |
| 14 | 4837597 | 4863466 | 25.869  |
| 14 | 4909826 | 4932404 | 22.578  |
| 14 | 4947532 | 5000503 | 52.971  |
| 14 | 5065875 | 5099705 | 33.83   |
| 14 | 5119964 | 5230676 | 110.712 |
| 14 | 5230687 | 5588244 | 357.557 |
| 14 | 5650571 | 5772435 | 121.864 |
| 14 | 5772440 | 5772481 | 0.041   |
| 14 | 5793378 | 5817516 | 24.138  |
| 14 | 5818018 | 5818041 | 0.023   |
| 14 | 5822116 | 5823377 | 1.261   |
| 14 | 5823383 | 5823507 | 0.124   |
| 14 | 5829186 | 5829220 | 0.034   |
| 14 | 5834227 | 5834828 | 0.601   |
| 14 | 5834832 | 5834859 | 0.027   |
| 14 | 5835543 | 5835557 | 0.014   |
| 14 | 5835765 | 5863148 | 27.383  |
| 14 | 5901548 | 5901873 | 0.325   |
| 14 | 6022651 | 6023780 | 1.129   |
| 14 | 6024185 | 6024215 | 0.03    |
| 14 | 6029174 | 6029755 | 0.581   |
| 14 | 6029808 | 6029817 | 0.009   |
| 14 | 6030922 | 6032121 | 1.199   |
| 14 | 6034923 | 6041485 | 6.562   |
| 14 | 6041510 | 6042084 | 0.574   |
| 14 | 6043892 | 6044423 | 0.531   |
| 14 | 6044827 | 6045068 | 0.241   |
| 14 | 6045267 | 6045288 | 0.021   |
| 14 | 6045300 | 6046145 | 0.845   |
| 14 | 6046806 | 6046831 | 0.025   |
| 14 | 6061853 | 6063045 | 1.192   |
| 14 | 6070964 | 6070999 | 0.035   |
| 14 | 6073921 | 6073929 | 0.008   |
| 14 | 6074298 | 6076923 | 2.625   |
| 14 | 6077415 | 6077436 | 0.021   |
| 14 | 6109671 | 6109777 | 0.106   |
| 14 | 6109804 | 6109860 | 0.056   |
| 14 | 6109934 | 6109938 | 0.004   |
| 14 | 6110014 | 6111325 | 1.311   |
| 14 | 6111335 | 6111355 | 0.02    |
| 14 | 6115864 | 6115879 | 0.015   |
| 14 | 6115974 | 6117359 | 1.385   |
| 14 | 6117461 | 6117962 | 0.501   |
| 14 | 6118472 | 6132708 | 14.236  |
| 14 | 6132753 | 6165775 | 33.022  |
| 14 | 6169728 | 6187779 | 18.051  |
| 14 | 6231713 | 6296028 | 64.315  |
| 14 | 6307007 | 6308009 | 1.002   |
| 14 | 6308430 | 6308483 | 0.053   |
| 14 | 6311503 | 6311577 | 0.074   |
| 14 | 6311688 | 6311915 | 0.227   |
| 14 | 6330280 | 6330820 | 0.54    |
| 14 | 6331968 | 6334254 | 2.286   |



|    |          |          |         |
|----|----------|----------|---------|
| 14 | 6345552  | 6353562  | 8.01    |
| 14 | 6354539  | 6368376  | 13.837  |
| 14 | 6374841  | 6405778  | 30.937  |
| 14 | 6421819  | 6450942  | 29.123  |
| 14 | 6549870  | 6816450  | 266.58  |
| 14 | 6839505  | 6854243  | 14.738  |
| 14 | 6871439  | 6877951  | 6.512   |
| 14 | 6911137  | 6915825  | 4.688   |
| 14 | 6916024  | 6926411  | 10.387  |
| 14 | 6926778  | 6932861  | 6.083   |
| 14 | 6967252  | 6970452  | 3.2     |
| 14 | 6981802  | 6993279  | 11.477  |
| 14 | 7006506  | 7207541  | 201.035 |
| 14 | 7232404  | 7277022  | 44.618  |
| 14 | 7370922  | 7371185  | 0.263   |
| 14 | 7376103  | 7416886  | 40.783  |
| 14 | 7416934  | 7472374  | 55.44   |
| 14 | 7675098  | 7733503  | 58.405  |
| 14 | 7751335  | 7804229  | 52.894  |
| 14 | 7847612  | 8448380  | 600.768 |
| 14 | 8949584  | 9443612  | 494.028 |
| 14 | 9635041  | 9635252  | 0.211   |
| 14 | 9812653  | 9908779  | 96.126  |
| 14 | 9944951  | 10109154 | 164.203 |
| 14 | 10136012 | 10285112 | 149.1   |
| 14 | 10294906 | 10523852 | 228.946 |
| 14 | 10523887 | 10539982 | 16.095  |
| 14 | 10620045 | 10623324 | 3.279   |
| 14 | 10669305 | 10669510 | 0.205   |
| 14 | 10676745 | 10688582 | 11.837  |
| 14 | 10781282 | 10808121 | 26.839  |
| 14 | 10851866 | 10922393 | 70.527  |
| 14 | 11045966 | 11072173 | 26.207  |
| 14 | 11122783 | 11143754 | 20.971  |
| 14 | 11144253 | 11156870 | 12.617  |
| 14 | 11181198 | 11313555 | 132.357 |
| 14 | 11327185 | 11336141 | 8.956   |
| 14 | 11398934 | 11442837 | 43.903  |
| 14 | 11466359 | 11621764 | 155.405 |
| 14 | 11626080 | 11696831 | 70.751  |
| 14 | 11708280 | 11748456 | 40.176  |
| 14 | 11751527 | 11810983 | 59.456  |
| 14 | 11814264 | 11822700 | 8.436   |
| 14 | 11850136 | 11990309 | 140.173 |
| 14 | 12002061 | 12254159 | 252.098 |
| 14 | 12512082 | 12628077 | 115.995 |
| 14 | 12649915 | 13093427 | 443.512 |
| 14 | 13187038 | 13187067 | 0.029   |
| 14 | 13406416 | 13634880 | 228.464 |
| 14 | 13634919 | 13918471 | 283.552 |
| 14 | 13935422 | 13994234 | 58.812  |
| 14 | 13995124 | 13995321 | 0.197   |
| 14 | 14006014 | 14061430 | 55.416  |
| 14 | 14075397 | 14295958 | 220.561 |
| 14 | 14299698 | 14339821 | 40.123  |
| 14 | 14339843 | 14370478 | 30.635  |
| 14 | 14378732 | 14495308 | 116.576 |
| 14 | 14512836 | 14731012 | 218.176 |
| 14 | 14828717 | 15370997 | 542.28  |
| 14 | 15416942 | 15788264 | 371.322 |
| 14 | 16006934 | 16017473 | 10.539  |

|    |          |          |         |
|----|----------|----------|---------|
| 14 | 16035499 | 16545654 | 510.155 |
| 14 | 17000965 | 17135934 | 134.969 |
| 14 | 17135946 | 17367228 | 231.282 |
| 14 | 17925861 | 17947774 | 21.913  |
| 14 | 18440618 | 18766713 | 326.095 |
| 14 | 18819477 | 18819500 | 0.023   |
| 14 | 18932149 | 18993159 | 61.01   |
| 14 | 18993167 | 19312275 | 319.108 |
| 14 | 19332971 | 19392983 | 60.012  |
| 14 | 19523316 | 19637641 | 114.325 |
| 14 | 19637831 | 19640376 | 2.545   |
| 14 | 19644887 | 20045270 | 400.383 |
| 14 | 20076194 | 20303949 | 227.755 |
| 14 | 20338850 | 20338902 | 0.052   |
| 14 | 20341351 | 20458977 | 117.626 |
| 14 | 20498147 | 20518712 | 20.565  |
| 14 | 20529740 | 20529767 | 0.027   |
| 14 | 20554351 | 20599237 | 44.886  |
| 14 | 20624372 | 20632704 | 8.332   |
| 14 | 20654324 | 20770525 | 116.201 |
| 14 | 20770534 | 20776020 | 5.486   |
| 14 | 20786324 | 20786430 | 0.106   |
| 14 | 20818996 | 20821865 | 2.869   |
| 14 | 20844550 | 20875470 | 30.92   |
| 14 | 20880331 | 20895436 | 15.105  |
| 14 | 20931172 | 20958486 | 27.314  |
| 14 | 20975608 | 20975869 | 0.261   |
| 14 | 21285927 | 21536973 | 251.046 |
| 14 | 21545507 | 21557137 | 11.63   |
| 14 | 21698026 | 21875878 | 177.852 |
| 14 | 21881742 | 21881850 | 0.108   |
| 14 | 21890972 | 21891245 | 0.273   |
| 14 | 21892888 | 21949802 | 56.914  |
| 14 | 21977629 | 21977650 | 0.021   |
| 14 | 22079126 | 22079164 | 0.038   |
| 14 | 22079566 | 22079768 | 0.202   |
| 14 | 22085299 | 22085500 | 0.201   |
| 14 | 22165157 | 22170824 | 5.667   |
| 14 | 22170855 | 22174315 | 3.46    |
| 14 | 22203492 | 22203507 | 0.015   |
| 14 | 22452371 | 22900769 | 448.398 |
| 14 | 22952700 | 22984275 | 31.575  |
| 14 | 22992011 | 23154314 | 162.303 |
| 14 | 23175805 | 23308608 | 132.803 |
| 14 | 23328647 | 23336083 | 7.436   |
| 14 | 23379792 | 23380877 | 1.085   |
| 14 | 23399524 | 23399726 | 0.202   |
| 14 | 23404058 | 23519740 | 115.682 |
| 14 | 23531141 | 23531174 | 0.033   |
| 14 | 23531254 | 23531411 | 0.157   |
| 14 | 23537694 | 23612260 | 74.566  |
| 14 | 23618524 | 23621402 | 2.878   |
| 14 | 23657122 | 23675545 | 18.423  |
| 14 | 23746963 | 23760987 | 14.024  |
| 14 | 23784374 | 23793648 | 9.274   |
| 14 | 23847800 | 23847833 | 0.033   |
| 14 | 23856319 | 23860380 | 4.061   |
| 14 | 23863369 | 23876398 | 13.029  |
| 14 | 23894875 | 23902055 | 7.18    |
| 14 | 23946202 | 23956030 | 9.828   |
| 14 | 23966875 | 23978639 | 11.764  |

|    |          |          |         |
|----|----------|----------|---------|
| 14 | 23981731 | 23983954 | 2.223   |
| 14 | 23983956 | 24327592 | 343.636 |
| 14 | 24592939 | 24779049 | 186.11  |
| 14 | 24886790 | 24887898 | 1.108   |
| 14 | 25001452 | 25001464 | 0.012   |
| 14 | 25357534 | 25720384 | 362.85  |
| 14 | 25740676 | 25740698 | 0.022   |
| 14 | 25754797 | 25810385 | 55.588  |
| 14 | 25838402 | 26110881 | 272.479 |
| 14 | 26134054 | 26235833 | 101.779 |
| 14 | 26283366 | 26364589 | 81.223  |
| 14 | 26420094 | 26460895 | 40.801  |
| 14 | 26470999 | 26515810 | 44.811  |
| 14 | 26812100 | 26869028 | 56.928  |
| 14 | 26935299 | 26935323 | 0.024   |
| 14 | 27009387 | 27077875 | 68.488  |
| 14 | 27174154 | 27277720 | 103.566 |
| 14 | 27285853 | 27389988 | 104.135 |
| 14 | 27461149 | 27841861 | 380.712 |
| 14 | 27878319 | 27966771 | 88.452  |
| 14 | 27967431 | 28111607 | 144.176 |
| 14 | 28218392 | 28682334 | 463.942 |
| 14 | 28682336 | 28770236 | 87.9    |
| 14 | 28794936 | 28818359 | 23.423  |
| 14 | 28849359 | 28935396 | 86.037  |
| 14 | 28935417 | 28963253 | 27.836  |
| 14 | 28985526 | 29267224 | 281.698 |
| 14 | 29274078 | 29395675 | 121.597 |
| 14 | 29437982 | 29443636 | 5.654   |
| 14 | 29882486 | 29893342 | 10.856  |
| 14 | 29955377 | 30084418 | 129.041 |
| 14 | 30277576 | 30597080 | 319.504 |
| 14 | 30734010 | 30757390 | 23.38   |
| 14 | 30780598 | 30851352 | 70.754  |
| 14 | 30929091 | 30985557 | 56.466  |
| 14 | 31154533 | 31209997 | 55.464  |
| 14 | 31385703 | 31479234 | 93.531  |
| 14 | 31520949 | 32140980 | 620.031 |
| 14 | 32181403 | 32916806 | 735.403 |
| 14 | 33165939 | 33255995 | 90.056  |
| 14 | 33344805 | 33486086 | 141.281 |
| 14 | 33520742 | 33556497 | 35.755  |
| 14 | 33556654 | 33578446 | 21.792  |
| 14 | 33607851 | 34020637 | 412.786 |
| 14 | 34384002 | 34860569 | 476.567 |
| 14 | 35039469 | 35199903 | 160.434 |
| 14 | 35212711 | 35382432 | 169.721 |
| 14 | 35384170 | 35644809 | 260.639 |
| 14 | 35644812 | 35653958 | 9.146   |
| 14 | 35682907 | 35707652 | 24.745  |
| 14 | 35950617 | 36223381 | 272.764 |
| 14 | 36233055 | 36326787 | 93.732  |
| 14 | 36527583 | 36669869 | 142.286 |
| 14 | 36768355 | 36812818 | 44.463  |
| 14 | 36930963 | 37328184 | 397.221 |
| 14 | 37328201 | 37715722 | 387.521 |
| 14 | 37716799 | 38019866 | 303.067 |
| 14 | 38076015 | 38163409 | 87.394  |
| 14 | 38163787 | 38430954 | 267.167 |
| 14 | 38452521 | 38592304 | 139.783 |
| 14 | 38592322 | 38596425 | 4.103   |

|    |          |          |          |
|----|----------|----------|----------|
| 14 | 38611510 | 38911098 | 299.588  |
| 14 | 38942984 | 38946726 | 3.742    |
| 14 | 38956174 | 39000549 | 44.375   |
| 14 | 39022237 | 39139691 | 117.454  |
| 14 | 39200010 | 39200077 | 0.067    |
| 14 | 39200115 | 39241845 | 41.73    |
| 14 | 39281621 | 39295589 | 13.968   |
| 14 | 39377494 | 40610360 | 1232.866 |
| 14 | 40639633 | 40682833 | 43.2     |
| 14 | 40716277 | 41358469 | 642.192  |
| 14 | 41389655 | 41473993 | 84.338   |
| 14 | 41475645 | 41504541 | 28.896   |
| 14 | 41510623 | 41523947 | 13.324   |
| 14 | 41523980 | 41608690 | 84.71    |
| 14 | 41614059 | 41640062 | 26.003   |
| 14 | 41736894 | 41856607 | 119.713  |
| 14 | 41971240 | 41986101 | 14.861   |
| 14 | 41989272 | 42067370 | 78.098   |
| 14 | 42120695 | 42174852 | 54.157   |
| 14 | 42206030 | 42231671 | 25.641   |
| 14 | 42237466 | 42504765 | 267.299  |
| 14 | 42566124 | 42711661 | 145.537  |
| 14 | 42711687 | 42711831 | 0.144    |
| 14 | 42712826 | 42850875 | 138.049  |
| 14 | 42850900 | 42933605 | 82.705   |
| 14 | 43702569 | 43890436 | 187.867  |
| 14 | 43940055 | 43970931 | 30.876   |
| 14 | 43990785 | 44252533 | 261.748  |
| 14 | 44426551 | 44444258 | 17.707   |
| 14 | 44560225 | 44660052 | 99.827   |
| 14 | 44674677 | 44768668 | 93.991   |
| 14 | 44918253 | 44918557 | 0.304    |
| 14 | 44931778 | 44958451 | 26.673   |
| 14 | 44958651 | 45145822 | 187.171  |
| 14 | 45243044 | 45311348 | 68.304   |
| 14 | 45335160 | 45350621 | 15.461   |
| 14 | 45378335 | 45484338 | 106.003  |
| 14 | 45509637 | 45534185 | 24.548   |
| 14 | 45557692 | 45572599 | 14.907   |
| 14 | 45616560 | 45675883 | 59.323   |
| 14 | 45690871 | 45705511 | 14.64    |
| 14 | 45916836 | 46566514 | 649.678  |
| 14 | 46566527 | 46566534 | 0.007    |
| 14 | 46579777 | 47103405 | 523.628  |
| 14 | 47142091 | 47368165 | 226.074  |
| 14 | 47607521 | 47767289 | 159.768  |
| 14 | 47984882 | 47985957 | 1.075    |
| 14 | 48014743 | 48035654 | 20.911   |
| 14 | 48043051 | 48126231 | 83.18    |
| 14 | 48131284 | 48145898 | 14.614   |
| 14 | 48150469 | 48195381 | 44.912   |
| 14 | 48203416 | 48220484 | 17.068   |
| 14 | 48228300 | 48419598 | 191.298  |
| 14 | 48447050 | 48558553 | 111.503  |
| 14 | 48584091 | 48669473 | 85.382   |
| 14 | 48686817 | 48686875 | 0.058    |
| 14 | 48702446 | 48914179 | 211.733  |
| 14 | 48924882 | 48962106 | 37.224   |
| 14 | 48973695 | 48997126 | 23.431   |
| 14 | 49023355 | 49237767 | 214.412  |
| 14 | 49328562 | 49374263 | 45.701   |

|    |          |          |         |
|----|----------|----------|---------|
| 14 | 49404870 | 49715384 | 310.514 |
| 14 | 49734821 | 49743071 | 8.25    |
| 14 | 49768382 | 49782295 | 13.913  |
| 14 | 49782857 | 49787776 | 4.919   |
| 14 | 49787966 | 49787974 | 0.008   |
| 14 | 49787993 | 49804963 | 16.97   |
| 14 | 49865832 | 49901742 | 35.91   |
| 14 | 49906502 | 49907894 | 1.392   |
| 14 | 49931019 | 49955979 | 24.96   |
| 14 | 49984896 | 50068148 | 83.252  |
| 14 | 50177935 | 50315917 | 137.982 |
| 14 | 50374457 | 50376649 | 2.192   |
| 14 | 50533595 | 50574805 | 41.21   |
| 14 | 50580245 | 50604088 | 23.843  |
| 14 | 50610738 | 50611559 | 0.821   |
| 14 | 50621566 | 50621751 | 0.185   |
| 14 | 50647172 | 50719083 | 71.911  |
| 14 | 50810047 | 50830939 | 20.892  |
| 14 | 50872205 | 50887923 | 15.718  |
| 14 | 50940105 | 50946146 | 6.041   |
| 14 | 50962875 | 50991183 | 28.308  |
| 14 | 51028539 | 51276299 | 247.76  |
| 14 | 51301854 | 51325854 | 24      |
| 14 | 51327015 | 51327565 | 0.55    |
| 14 | 51400436 | 51402232 | 1.796   |
| 14 | 51411583 | 51428040 | 16.457  |
| 14 | 51477513 | 51645309 | 167.796 |
| 14 | 51673401 | 51686535 | 13.134  |
| 14 | 51723600 | 51729330 | 5.73    |
| 14 | 51755528 | 52022072 | 266.544 |
| 14 | 52045984 | 52051299 | 5.315   |
| 14 | 52053275 | 52160351 | 107.076 |
| 14 | 52228189 | 52233144 | 4.955   |
| 14 | 52250744 | 52252567 | 1.823   |
| 14 | 52254674 | 52261277 | 6.603   |
| 14 | 52415300 | 52610616 | 195.316 |
| 14 | 52624628 | 52678424 | 53.796  |
| 14 | 52701896 | 52752578 | 50.682  |
| 14 | 52762696 | 52773352 | 10.656  |
| 14 | 52786505 | 52794328 | 7.823   |
| 14 | 52795831 | 52807866 | 12.035  |
| 14 | 52813599 | 52824116 | 10.517  |
| 14 | 52859978 | 53606774 | 746.796 |
| 14 | 54217299 | 55052479 | 835.18  |
| 14 | 55064222 | 55346269 | 282.047 |
| 14 | 55364866 | 55448055 | 83.189  |
| 14 | 55482448 | 55533977 | 51.529  |
| 14 | 55804777 | 56162523 | 357.746 |
| 14 | 56193887 | 56422925 | 229.038 |
| 14 | 56422927 | 56991660 | 568.733 |
| 14 | 57151516 | 57446965 | 295.449 |
| 14 | 57470617 | 57477411 | 6.794   |
| 14 | 57477431 | 57519530 | 42.099  |
| 14 | 57525544 | 57670893 | 145.349 |
| 14 | 57726682 | 57852626 | 125.944 |
| 14 | 57875347 | 57875366 | 0.019   |
| 14 | 57925121 | 57954484 | 29.363  |
| 14 | 58002223 | 58593802 | 591.579 |
| 14 | 58596906 | 58700847 | 103.941 |
| 14 | 58703694 | 58712688 | 8.994   |
| 14 | 58841134 | 59250878 | 409.744 |

|    |          |          |          |
|----|----------|----------|----------|
| 14 | 59285751 | 59293938 | 8.187    |
| 14 | 59790011 | 60159196 | 369.185  |
| 14 | 60159198 | 60159226 | 0.028    |
| 14 | 60167236 | 60719528 | 552.292  |
| 14 | 60893389 | 60964912 | 71.523   |
| 14 | 61173377 | 61617128 | 443.751  |
| 14 | 61629585 | 61636354 | 6.769    |
| 14 | 61679112 | 61684431 | 5.319    |
| 14 | 61724361 | 61804016 | 79.655   |
| 14 | 61917793 | 61947363 | 29.57    |
| 14 | 62007574 | 62049286 | 41.712   |
| 14 | 62098927 | 62131537 | 32.61    |
| 14 | 62133698 | 62133753 | 0.055    |
| 14 | 62158666 | 62344147 | 185.481  |
| 14 | 62380530 | 62385519 | 4.989    |
| 14 | 62421804 | 62424817 | 3.013    |
| 14 | 62439520 | 62470317 | 30.797   |
| 14 | 62498796 | 62889417 | 390.621  |
| 14 | 62900674 | 63115487 | 214.813  |
| 14 | 63450245 | 63819746 | 369.501  |
| 14 | 63822420 | 63822426 | 0.006    |
| 14 | 63851792 | 63894936 | 43.144   |
| 14 | 63905487 | 63947009 | 41.522   |
| 14 | 63986982 | 63987317 | 0.335    |
| 14 | 63987380 | 64802628 | 815.248  |
| 14 | 64993053 | 65791512 | 798.459  |
| 14 | 65916843 | 66039298 | 122.455  |
| 14 | 66429809 | 66486129 | 56.32    |
| 14 | 66486148 | 66632485 | 146.337  |
| 14 | 66902242 | 67370147 | 467.905  |
| 14 | 67451922 | 67507101 | 55.179   |
| 14 | 67512691 | 68181750 | 669.059  |
| 14 | 68336173 | 68784965 | 448.792  |
| 14 | 68819840 | 69955337 | 1135.497 |
| 14 | 72115506 | 73273345 | 1157.839 |
| 14 | 73465368 | 73768321 | 302.953  |
| 14 | 74123703 | 74766320 | 642.617  |
| 14 | 74766327 | 75132042 | 365.715  |
| 14 | 75179258 | 75181856 | 2.598    |
| 14 | 75295943 | 75594532 | 298.589  |
| 14 | 75595198 | 75615194 | 19.996   |
| 14 | 75617831 | 75665477 | 47.646   |
| 14 | 75669758 | 76080039 | 410.281  |
| 14 | 76313044 | 76372408 | 59.364   |
| 14 | 76372423 | 76569444 | 197.021  |
| 14 | 76604071 | 76760887 | 156.816  |
| 14 | 76795988 | 76804436 | 8.448    |
| 14 | 76804455 | 76989163 | 184.708  |
| 14 | 76989188 | 77027135 | 37.947   |
| 14 | 77062454 | 77261981 | 199.527  |
| 14 | 77312650 | 77327187 | 14.537   |
| 14 | 77361682 | 77414530 | 52.848   |
| 14 | 77426348 | 77448076 | 21.728   |
| 14 | 77463481 | 77508526 | 45.045   |
| 14 | 77540844 | 77594919 | 54.075   |
| 14 | 77626059 | 77674022 | 47.963   |
| 14 | 77675430 | 77787150 | 111.72   |
| 14 | 77812283 | 77818997 | 6.714    |
| 14 | 77824423 | 77882919 | 58.496   |
| 14 | 77900439 | 78124625 | 224.186  |
| 14 | 78133258 | 78340308 | 207.05   |

|    |          |          |          |
|----|----------|----------|----------|
| 14 | 78367683 | 79815548 | 1447.865 |
| 14 | 79833854 | 80385494 | 551.64   |
| 14 | 80679382 | 80815644 | 136.262  |
| 14 | 80856971 | 80864779 | 7.808    |
| 14 | 80886159 | 81310053 | 423.894  |
| 14 | 81383948 | 81692118 | 308.17   |
| 14 | 81720611 | 81978891 | 258.28   |
| 14 | 82192661 | 83011555 | 818.894  |
| 14 | 83159171 | 83384973 | 225.802  |
| 14 | 83415896 | 83473355 | 57.459   |
| 14 | 83474462 | 83932088 | 457.626  |
| 14 | 83939524 | 83983408 | 43.884   |
| 14 | 84000474 | 84141811 | 141.337  |
| 14 | 84197287 | 84377445 | 180.158  |
| 14 | 84393404 | 84475280 | 81.876   |
| 14 | 84499630 | 84509062 | 9.432    |
| 14 | 84545226 | 84545240 | 0.014    |
| 14 | 84565309 | 84599981 | 34.672   |
| 14 | 84620330 | 85000796 | 380.466  |
| 14 | 85018945 | 85050266 | 31.321   |
| 14 | 85052347 | 85142911 | 90.564   |
| 14 | 85160669 | 85167532 | 6.863    |
| 14 | 85171837 | 85177643 | 5.806    |
| 14 | 85230933 | 85564179 | 333.246  |
| 14 | 85564235 | 85830119 | 265.884  |
| 14 | 85832651 | 85848073 | 15.422   |
| 14 | 85909815 | 85994528 | 84.713   |
| 14 | 86035644 | 86083552 | 47.908   |
| 14 | 86537405 | 86876921 | 339.516  |
| 14 | 87130198 | 87744107 | 613.909  |
| 14 | 87744117 | 87848230 | 104.113  |
| 14 | 88071908 | 89138579 | 1066.671 |
| 14 | 89175962 | 89567414 | 391.452  |
| 14 | 89603203 | 90256302 | 653.099  |
| 14 | 90326387 | 90327656 | 1.269    |
| 14 | 90367184 | 90381634 | 14.45    |
| 14 | 90399905 | 90443209 | 43.304   |
| 14 | 90462932 | 90748501 | 285.569  |
| 14 | 90781294 | 90803695 | 22.401   |
| 14 | 90821719 | 91072614 | 250.895  |
| 14 | 91161700 | 91437164 | 275.464  |
| 14 | 91450930 | 91507076 | 56.146   |
| 14 | 91972105 | 92025925 | 53.82    |
| 14 | 92046784 | 92313537 | 266.753  |
| 14 | 92343195 | 92474819 | 131.624  |
| 14 | 92485675 | 92513918 | 28.243   |
| 14 | 92533614 | 92643022 | 109.408  |
| 14 | 92655816 | 92717649 | 61.833   |
| 14 | 92893244 | 92900896 | 7.652    |
| 14 | 92900907 | 93120060 | 219.153  |
| 14 | 93139563 | 93210266 | 70.703   |
| 14 | 93229628 | 93273019 | 43.391   |
| 14 | 93303919 | 93441730 | 137.811  |
| 14 | 93442220 | 93520381 | 78.161   |
| 14 | 93559689 | 93608433 | 48.744   |
| 14 | 93609797 | 93694573 | 84.776   |
| 14 | 93719806 | 93767417 | 47.611   |
| 14 | 93783016 | 93850161 | 67.145   |
| 14 | 93936758 | 93960271 | 23.513   |
| 14 | 94039223 | 94050035 | 10.812   |
| 14 | 94053803 | 94123879 | 70.076   |

|    |           |           |          |
|----|-----------|-----------|----------|
| 14 | 94499665  | 94830543  | 330.878  |
| 14 | 94880036  | 94880722  | 0.686    |
| 14 | 95318438  | 95320681  | 2.243    |
| 14 | 95396939  | 95524508  | 127.569  |
| 14 | 95801304  | 95933250  | 131.946  |
| 14 | 95933425  | 95933633  | 0.208    |
| 14 | 95978011  | 96476844  | 498.833  |
| 14 | 96756464  | 97258332  | 501.868  |
| 14 | 97642425  | 98842372  | 1199.947 |
| 14 | 100375080 | 101628239 | 1253.159 |
| 14 | 101628321 | 101810369 | 182.048  |
| 14 | 101894942 | 101895211 | 0.269    |
| 14 | 102398518 | 102566611 | 168.093  |
| 14 | 102566621 | 104067692 | 1501.071 |
| 14 | 104194503 | 104965643 | 771.14   |
| 14 | 105061544 | 105063161 | 1.617    |
| 14 | 105120832 | 105175045 | 54.213   |
| 14 | 105574979 | 105735321 | 160.342  |
| 14 | 105771948 | 105772003 | 0.055    |
| 14 | 105782278 | 105805016 | 22.738   |
| 14 | 105867755 | 105884805 | 17.05    |
| 14 | 105935837 | 106055387 | 119.55   |
| 14 | 106090325 | 106100428 | 10.103   |
| 14 | 106102632 | 107158726 | 1056.094 |
| 14 | 107449131 | 107484593 | 35.462   |
| 14 | 107579798 | 107728085 | 148.287  |
| 14 | 107728093 | 108329391 | 601.298  |
| 14 | 108333863 | 108501481 | 167.618  |
| 14 | 108864189 | 110194184 | 1329.995 |
| 14 | 110280822 | 110542445 | 261.623  |
| 14 | 110839132 | 111353913 | 514.781  |
| 14 | 111451183 | 111492146 | 40.963   |
| 14 | 111492182 | 111495408 | 3.226    |
| 14 | 111536965 | 111619669 | 82.704   |
| 14 | 111624351 | 111624364 | 0.013    |
| 14 | 111628920 | 111715302 | 86.382   |
| 14 | 111782209 | 111897395 | 115.186  |
| 14 | 112045691 | 112161052 | 115.361  |
| 14 | 112190982 | 112407980 | 216.998  |
| 14 | 112692558 | 112805309 | 112.751  |
| 14 | 112933214 | 113259645 | 326.431  |
| 14 | 113529376 | 113534323 | 4.947    |
| 14 | 113692732 | 113728929 | 36.197   |
| 14 | 113780802 | 113801761 | 20.959   |
| 14 | 113807537 | 113815685 | 8.148    |
| 14 | 113860229 | 113901877 | 41.648   |
| 14 | 113957760 | 113974462 | 16.702   |
| 14 | 113983700 | 114148297 | 164.597  |
| 14 | 114151389 | 114151402 | 0.013    |
| 14 | 114157980 | 114277771 | 119.791  |
| 14 | 114317424 | 114379096 | 61.672   |
| 14 | 114411947 | 114733145 | 321.198  |
| 14 | 114733303 | 115317045 | 583.742  |
| 14 | 115443608 | 115785641 | 342.033  |
| 14 | 115800516 | 115818716 | 18.2     |
| 14 | 116028932 | 116660000 | 631.068  |
| 14 | 116702137 | 116747471 | 45.334   |
| 14 | 116771360 | 116838782 | 67.422   |
| 14 | 116842441 | 116892350 | 49.909   |
| 14 | 116918188 | 116975683 | 57.495   |
| 14 | 117121993 | 117123580 | 1.587    |



|    |           |           |          |
|----|-----------|-----------|----------|
| 14 | 117179079 | 117344788 | 165.709  |
| 14 | 117455547 | 117455753 | 0.206    |
| 14 | 117467554 | 117468812 | 1.258    |
| 14 | 117519028 | 118093932 | 574.904  |
| 14 | 118121292 | 118138686 | 17.394   |
| 14 | 118361112 | 118682827 | 321.715  |
| 14 | 118688702 | 119298526 | 609.824  |
| 14 | 119485675 | 119491329 | 5.654    |
| 14 | 119506996 | 119518732 | 11.736   |
| 14 | 119572415 | 119572462 | 0.047    |
| 14 | 119597758 | 119619314 | 21.556   |
| 14 | 119628270 | 119642382 | 14.112   |
| 14 | 119748084 | 119871881 | 123.797  |
| 14 | 119882277 | 120084844 | 202.567  |
| 14 | 120085647 | 120892316 | 806.669  |
| 14 | 120925849 | 121748151 | 822.302  |
| 14 | 121822431 | 122041274 | 218.843  |
| 14 | 122131334 | 123058424 | 927.09   |
| 14 | 123110449 | 124869675 | 1759.226 |
| 14 | 125066479 | 125434417 | 367.938  |
| 14 | 125659659 | 125876871 | 217.212  |
| 14 | 125970271 | 126435017 | 464.746  |
| 14 | 126435020 | 126474660 | 39.64    |
| 14 | 126481512 | 126691325 | 209.813  |
| 14 | 126765458 | 127076008 | 310.55   |
| 14 | 127082180 | 127283851 | 201.671  |
| 14 | 127283861 | 127287841 | 3.98     |
| 14 | 127346190 | 127388120 | 41.93    |
| 14 | 127472887 | 127513017 | 40.13    |
| 14 | 127520736 | 128102011 | 581.275  |
| 14 | 128115016 | 128144060 | 29.044   |
| 14 | 128209448 | 129116023 | 906.575  |
| 14 | 129178519 | 129249036 | 70.517   |
| 14 | 129257074 | 129289562 | 32.488   |
| 14 | 129306047 | 129404919 | 98.872   |
| 14 | 129408002 | 129429995 | 21.993   |
| 14 | 129434463 | 129463787 | 29.324   |
| 14 | 129464811 | 129567177 | 102.366  |
| 14 | 129616555 | 129700050 | 83.495   |
| 14 | 129738638 | 129791293 | 52.655   |
| 14 | 129814581 | 130255039 | 440.458  |
| 14 | 130422373 | 130460735 | 38.362   |
| 14 | 130465151 | 130473651 | 8.5      |
| 14 | 130520448 | 130522160 | 1.712    |
| 14 | 130524832 | 130671527 | 146.695  |
| 14 | 130680918 | 130687241 | 6.323    |
| 14 | 130736091 | 130838716 | 102.625  |
| 14 | 130839448 | 130839496 | 0.048    |
| 14 | 130958979 | 131348504 | 389.525  |
| 14 | 131423428 | 131461137 | 37.709   |
| 14 | 131633766 | 131938875 | 305.109  |
| 14 | 131969566 | 131969593 | 0.027    |
| 14 | 131984232 | 132053937 | 69.705   |
| 14 | 132058414 | 132111346 | 52.932   |
| 14 | 132111857 | 132147988 | 36.131   |
| 14 | 132156783 | 132157573 | 0.79     |
| 14 | 132391070 | 132607110 | 216.04   |
| 14 | 132636099 | 132645490 | 9.391    |
| 14 | 132744621 | 132744668 | 0.047    |
| 14 | 132771205 | 132787978 | 16.773   |
| 14 | 132788120 | 132851110 | 62.99    |

|    |           |           |         |
|----|-----------|-----------|---------|
| 14 | 132907770 | 133171060 | 263.29  |
| 14 | 133172029 | 133187479 | 15.45   |
| 14 | 133213412 | 133228064 | 14.652  |
| 14 | 133413338 | 133423888 | 10.55   |
| 14 | 133463345 | 133485741 | 22.396  |
| 14 | 133570754 | 133600658 | 29.904  |
| 14 | 133642547 | 133687388 | 44.841  |
| 14 | 133693032 | 133739742 | 46.71   |
| 14 | 133742974 | 133753385 | 10.411  |
| 14 | 133805471 | 134114013 | 308.542 |
| 14 | 134193397 | 134205661 | 12.264  |
| 14 | 134259394 | 134413864 | 154.47  |
| 14 | 134501384 | 134768163 | 266.779 |
| 14 | 134781820 | 134904532 | 122.712 |
| 14 | 134934802 | 134996421 | 61.619  |
| 14 | 135007185 | 135113934 | 106.749 |
| 14 | 135152875 | 135153038 | 0.163   |
| 14 | 135158343 | 135201597 | 43.254  |
| 14 | 135201880 | 135202098 | 0.218   |
| 14 | 135209166 | 135209281 | 0.115   |
| 14 | 135210911 | 135217698 | 6.787   |
| 14 | 135236123 | 135251417 | 15.294  |
| 14 | 135253417 | 135275243 | 21.826  |
| 14 | 135278738 | 135305045 | 26.307  |
| 14 | 135363990 | 135378393 | 14.403  |
| 14 | 135410731 | 135547291 | 136.56  |
| 14 | 135548337 | 135548506 | 0.169   |
| 14 | 135551807 | 135551843 | 0.036   |
| 14 | 135606866 | 135699745 | 92.879  |
| 14 | 135888763 | 135971917 | 83.154  |
| 14 | 136108028 | 136219682 | 111.654 |
| 14 | 136318440 | 136318484 | 0.044   |
| 14 | 136357376 | 136411331 | 53.955  |
| 14 | 136526090 | 136790145 | 264.055 |
| 14 | 136821838 | 136849206 | 27.368  |
| 14 | 136909475 | 136959722 | 50.247  |
| 14 | 137015359 | 137050552 | 35.193  |
| 14 | 137050577 | 137055968 | 5.391   |
| 14 | 137098834 | 137098880 | 0.046   |
| 14 | 137104866 | 137313504 | 208.638 |
| 14 | 137688281 | 137688295 | 0.014   |
| 14 | 137710058 | 137879582 | 169.524 |
| 14 | 137989307 | 137990497 | 1.19    |
| 14 | 138025725 | 138053120 | 27.395  |
| 14 | 138078608 | 138084211 | 5.603   |
| 14 | 138085991 | 138104691 | 18.7    |
| 14 | 138139654 | 138139690 | 0.036   |
| 14 | 138140088 | 138162445 | 22.357  |
| 14 | 138181529 | 138276165 | 94.636  |
| 14 | 138289609 | 138453285 | 163.676 |
| 14 | 138495720 | 138631485 | 135.765 |
| 14 | 138710221 | 138727337 | 17.116  |
| 14 | 138967592 | 139071771 | 104.179 |
| 14 | 139092596 | 139093742 | 1.146   |
| 14 | 139096409 | 139103034 | 6.625   |
| 14 | 139147308 | 139287857 | 140.549 |
| 14 | 139333636 | 139347025 | 13.389  |
| 14 | 139356298 | 139433237 | 76.939  |
| 14 | 139468001 | 139528919 | 60.918  |
| 14 | 139529102 | 139530835 | 1.733   |
| 14 | 139592208 | 139598243 | 6.035   |

|    |           |           |         |
|----|-----------|-----------|---------|
| 14 | 139613999 | 139671746 | 57.747  |
| 14 | 139683108 | 139687955 | 4.847   |
| 14 | 139696585 | 139713132 | 16.547  |
| 14 | 139739928 | 139768721 | 28.793  |
| 14 | 139782694 | 139923334 | 140.64  |
| 14 | 140645464 | 140725949 | 80.485  |
| 14 | 140740516 | 140751472 | 10.956  |
| 14 | 140773631 | 140791594 | 17.963  |
| 14 | 140808910 | 140811855 | 2.945   |
| 14 | 140811962 | 140819580 | 7.618   |
| 14 | 140839445 | 141089843 | 250.398 |
| 14 | 141098684 | 141107963 | 9.279   |
| 14 | 141118335 | 141225847 | 107.512 |
| 14 | 141227703 | 141228012 | 0.309   |
| 14 | 141472324 | 141528783 | 56.459  |
| 14 | 141601254 | 141697701 | 96.447  |
| 14 | 141697703 | 141742996 | 45.293  |
| 14 | 141941821 | 141941843 | 0.022   |
| 14 | 141941845 | 141943935 | 2.09    |
| 14 | 142046158 | 142079068 | 32.91   |
| 14 | 142118569 | 142207277 | 88.708  |
| 14 | 142270204 | 142324250 | 54.046  |
| 14 | 142353294 | 142358919 | 5.625   |
| 14 | 142523606 | 142523618 | 0.012   |
| 14 | 142539352 | 142672569 | 133.217 |
| 14 | 142672600 | 142682493 | 9.893   |
| 14 | 142730111 | 142837419 | 107.308 |
| 14 | 142879062 | 142879081 | 0.019   |
| 14 | 142901536 | 142920250 | 18.714  |
| 14 | 142951066 | 143038493 | 87.427  |
| 14 | 143092789 | 143151297 | 58.508  |
| 14 | 143167926 | 143182225 | 14.299  |
| 14 | 143237046 | 143494840 | 257.794 |
| 14 | 143608694 | 143611859 | 3.165   |
| 14 | 143631853 | 143631896 | 0.043   |
| 14 | 143664602 | 144101068 | 436.466 |
| 14 | 144141541 | 144363643 | 222.102 |
| 14 | 144389620 | 144420882 | 31.262  |
| 14 | 144422443 | 144453525 | 31.082  |
| 14 | 144460928 | 144461585 | 0.657   |
| 14 | 144472167 | 144528201 | 56.034  |
| 14 | 144549021 | 144599082 | 50.061  |
| 14 | 144621828 | 144669559 | 47.731  |
| 14 | 144669568 | 144825860 | 156.292 |
| 14 | 144849078 | 144860873 | 11.795  |
| 14 | 144957419 | 144961826 | 4.407   |
| 14 | 144988533 | 145019405 | 30.872  |
| 14 | 145026599 | 145026872 | 0.273   |
| 14 | 145101047 | 145105735 | 4.688   |
| 14 | 145133173 | 145162356 | 29.183  |
| 14 | 145179946 | 145189043 | 9.097   |
| 14 | 145190965 | 145191011 | 0.046   |
| 14 | 145200195 | 145212624 | 12.429  |
| 14 | 145259552 | 145272551 | 12.999  |
| 14 | 145272649 | 145274162 | 1.513   |
| 14 | 145287528 | 145311770 | 24.242  |
| 14 | 145330123 | 145388799 | 58.676  |
| 14 | 145410931 | 145433370 | 22.439  |
| 14 | 145486631 | 145497413 | 10.782  |
| 14 | 145622026 | 145664826 | 42.8    |
| 14 | 145701623 | 145796074 | 94.451  |

|    |           |           |         |
|----|-----------|-----------|---------|
| 14 | 145940914 | 145997627 | 56.713  |
| 14 | 146012702 | 146018381 | 5.679   |
| 14 | 146035585 | 146042682 | 7.097   |
| 14 | 146048620 | 146091237 | 42.617  |
| 14 | 146094914 | 146140167 | 45.253  |
| 14 | 146147426 | 146148701 | 1.275   |
| 14 | 146148707 | 146158785 | 10.078  |
| 14 | 146197307 | 146244181 | 46.874  |
| 14 | 146250397 | 146250611 | 0.214   |
| 14 | 146280627 | 146321455 | 40.828  |
| 14 | 146321461 | 146328357 | 6.896   |
| 14 | 146329460 | 146365116 | 35.656  |
| 14 | 146386146 | 146386352 | 0.206   |
| 14 | 146409051 | 146420091 | 11.04   |
| 14 | 146423905 | 146424039 | 0.134   |
| 14 | 146465914 | 146468616 | 2.702   |
| 14 | 146514427 | 146514707 | 0.28    |
| 14 | 146552994 | 146578036 | 25.042  |
| 14 | 146593664 | 146652778 | 59.114  |
| 14 | 146780790 | 146805783 | 24.993  |
| 14 | 146819593 | 146836885 | 17.292  |
| 14 | 147040063 | 147043238 | 3.175   |
| 14 | 147101679 | 147141808 | 40.129  |
| 14 | 147172208 | 147233725 | 61.517  |
| 14 | 147244134 | 147248340 | 4.206   |
| 14 | 147256721 | 147264726 | 8.005   |
| 14 | 147275687 | 147294020 | 18.333  |
| 14 | 147294144 | 147294416 | 0.272   |
| 14 | 147303864 | 147308017 | 4.153   |
| 14 | 147364640 | 147369640 | 5       |
| 14 | 147386981 | 147392543 | 5.562   |
| 14 | 147418613 | 147418621 | 0.008   |
| 14 | 147420486 | 147444179 | 23.693  |
| 14 | 147470863 | 147537156 | 66.293  |
| 14 | 147544371 | 147602406 | 58.035  |
| 14 | 147679370 | 147681332 | 1.962   |
| 14 | 147688348 | 147742672 | 54.324  |
| 14 | 147777343 | 147804079 | 26.736  |
| 14 | 147941792 | 147949648 | 7.856   |
| 14 | 147971865 | 147980823 | 8.958   |
| 14 | 148009760 | 148057630 | 47.87   |
| 14 | 148098902 | 148100895 | 1.993   |
| 14 | 148140141 | 148143966 | 3.825   |
| 14 | 148198291 | 148237726 | 39.435  |
| 14 | 148237730 | 148237941 | 0.211   |
| 14 | 148350286 | 148351666 | 1.38    |
| 14 | 148427849 | 148482406 | 54.557  |
| 14 | 148483105 | 148499837 | 16.732  |
| 15 | 2633577   | 3465769   | 832.192 |
| 15 | 4283899   | 4308884   | 24.985  |
| 15 | 4308888   | 5284459   | 975.571 |
| 15 | 6177734   | 6984236   | 806.502 |
| 15 | 7144672   | 7367837   | 223.165 |
| 15 | 7379086   | 7386093   | 7.007   |
| 15 | 7487842   | 7528263   | 40.421  |
| 15 | 7528302   | 7692119   | 163.817 |
| 15 | 7719076   | 7719215   | 0.139   |
| 15 | 7719315   | 7873840   | 154.525 |
| 15 | 8665779   | 8839603   | 173.824 |
| 15 | 8847018   | 9133560   | 286.542 |
| 15 | 9799888   | 10688672  | 888.784 |

|    |          |          |          |
|----|----------|----------|----------|
| 15 | 11095781 | 12697488 | 1601.707 |
| 15 | 12792802 | 13023625 | 230.823  |
| 15 | 13040881 | 13555444 | 514.563  |
| 15 | 13660376 | 13758951 | 98.575   |
| 15 | 13815663 | 13889531 | 73.868   |
| 15 | 13968618 | 14013025 | 44.407   |
| 15 | 14335052 | 14470418 | 135.366  |
| 15 | 14474645 | 14474792 | 0.147    |
| 15 | 14477879 | 14478156 | 0.277    |
| 15 | 14478217 | 14493820 | 15.603   |
| 15 | 14501273 | 14501316 | 0.043    |
| 15 | 14511887 | 14569057 | 57.17    |
| 15 | 15001241 | 15707019 | 705.778  |
| 15 | 15737172 | 15811107 | 73.935   |
| 15 | 15928253 | 16138819 | 210.566  |
| 15 | 16138822 | 16144093 | 5.271    |
| 15 | 16166226 | 16290354 | 124.128  |
| 15 | 16291847 | 16297015 | 5.168    |
| 15 | 16489026 | 16615159 | 126.133  |
| 15 | 17180360 | 17491710 | 311.35   |
| 15 | 17491805 | 18078791 | 586.986  |
| 15 | 18164768 | 18239893 | 75.125   |
| 15 | 18243934 | 18639809 | 395.875  |
| 15 | 19005248 | 21774548 | 2769.3   |
| 15 | 21804333 | 22120248 | 315.915  |
| 15 | 22202443 | 22719450 | 517.007  |
| 15 | 22863837 | 22896544 | 32.707   |
| 15 | 22955476 | 23508363 | 552.887  |
| 15 | 23594980 | 23613669 | 18.689   |
| 15 | 23615001 | 23617118 | 2.117    |
| 15 | 23631627 | 23637477 | 5.85     |
| 15 | 23661269 | 23829703 | 168.434  |
| 15 | 23838960 | 23892350 | 53.39    |
| 15 | 23966277 | 24173125 | 206.848  |
| 15 | 24193268 | 24288413 | 95.145   |
| 15 | 24341219 | 24358101 | 16.882   |
| 15 | 24391271 | 24391302 | 0.031    |
| 15 | 24391469 | 24459045 | 67.576   |
| 15 | 24467850 | 25263388 | 795.538  |
| 15 | 25267786 | 25284295 | 16.509   |
| 15 | 25641413 | 25678143 | 36.73    |
| 15 | 25900609 | 26619221 | 718.612  |
| 15 | 26778437 | 26973514 | 195.077  |
| 15 | 27704292 | 27790395 | 86.103   |
| 15 | 27800916 | 27826562 | 25.646   |
| 15 | 27956907 | 27984794 | 27.887   |
| 15 | 28012258 | 28121319 | 109.061  |
| 15 | 28178600 | 28296799 | 118.199  |
| 15 | 28337682 | 28371962 | 34.28    |
| 15 | 28423456 | 28507605 | 84.149   |
| 15 | 28507693 | 28513935 | 6.242    |
| 15 | 28517003 | 28549761 | 32.758   |
| 15 | 28574114 | 28574124 | 0.01     |
| 15 | 28574379 | 28589548 | 15.169   |
| 15 | 28607499 | 28686168 | 78.669   |
| 15 | 28694832 | 28715776 | 20.944   |
| 15 | 28719066 | 28746225 | 27.159   |
| 15 | 28746236 | 28772110 | 25.874   |
| 15 | 28772808 | 28791476 | 18.668   |
| 15 | 28859859 | 29036875 | 177.016  |
| 15 | 29050712 | 29139035 | 88.323   |

|    |          |          |          |
|----|----------|----------|----------|
| 15 | 29151151 | 29151167 | 0.016    |
| 15 | 29151217 | 29167564 | 16.347   |
| 15 | 29169602 | 29175200 | 5.598    |
| 15 | 29194394 | 29310944 | 116.55   |
| 15 | 29348439 | 29348936 | 0.497    |
| 15 | 29350948 | 29418867 | 67.919   |
| 15 | 29437687 | 29437806 | 0.119    |
| 15 | 29452922 | 29951321 | 498.399  |
| 15 | 30009285 | 30296489 | 287.204  |
| 15 | 30296633 | 30501848 | 205.215  |
| 15 | 30501884 | 30505050 | 3.166    |
| 15 | 30506074 | 30516683 | 10.609   |
| 15 | 30543377 | 30543438 | 0.061    |
| 15 | 30548548 | 30568892 | 20.344   |
| 15 | 30642072 | 30662728 | 20.656   |
| 15 | 30662747 | 30686496 | 23.749   |
| 15 | 30813690 | 30854621 | 40.931   |
| 15 | 30870477 | 30870535 | 0.058    |
| 15 | 30943729 | 30955577 | 11.848   |
| 15 | 30955597 | 31082205 | 126.608  |
| 15 | 31094787 | 31164102 | 69.315   |
| 15 | 31299065 | 31796020 | 496.955  |
| 15 | 31796803 | 31840985 | 44.182   |
| 15 | 31859492 | 31947636 | 88.144   |
| 15 | 31978515 | 32406633 | 428.118  |
| 15 | 32406639 | 32407177 | 0.538    |
| 15 | 32442362 | 32572252 | 129.89   |
| 15 | 32644319 | 32776851 | 132.532  |
| 15 | 32988403 | 33106810 | 118.407  |
| 15 | 33120707 | 33241057 | 120.35   |
| 15 | 33338638 | 33474296 | 135.658  |
| 15 | 33665745 | 33911139 | 245.394  |
| 15 | 34244054 | 34499129 | 255.075  |
| 15 | 34557161 | 34811950 | 254.789  |
| 15 | 34839546 | 34982260 | 142.714  |
| 15 | 34998432 | 34998456 | 0.024    |
| 15 | 34998491 | 34998534 | 0.043    |
| 15 | 35036956 | 35168757 | 131.801  |
| 15 | 35170530 | 35171907 | 1.377    |
| 15 | 35171935 | 35174379 | 2.444    |
| 15 | 35174482 | 36608853 | 1434.371 |
| 15 | 38415471 | 40162755 | 1747.284 |
| 15 | 40729734 | 41627452 | 897.718  |
| 15 | 41645342 | 41645356 | 0.014    |
| 15 | 41651233 | 42036011 | 384.778  |
| 15 | 42057348 | 42078933 | 21.585   |
| 15 | 42157218 | 42226531 | 69.313   |
| 15 | 42226863 | 42270137 | 43.274   |
| 15 | 42318731 | 42441963 | 123.232  |
| 15 | 42450288 | 42472854 | 22.566   |
| 15 | 42476446 | 42476493 | 0.047    |
| 15 | 42476623 | 43015517 | 538.894  |
| 15 | 43315676 | 43997309 | 681.633  |
| 15 | 44198261 | 45273484 | 1075.223 |
| 15 | 45428540 | 45666871 | 238.331  |
| 15 | 45724153 | 46056394 | 332.241  |
| 15 | 46062997 | 46388039 | 325.042  |
| 15 | 46432070 | 46838339 | 406.269  |
| 15 | 46838347 | 47061918 | 223.571  |
| 15 | 47125962 | 47707720 | 581.758  |
| 15 | 47996513 | 49342958 | 1346.445 |

|    |           |           |          |
|----|-----------|-----------|----------|
| 15 | 49366090  | 51319544  | 1953.454 |
| 15 | 51954192  | 52346908  | 392.716  |
| 15 | 52346926  | 53089186  | 742.26   |
| 15 | 53434201  | 54176280  | 742.079  |
| 15 | 54266720  | 54736620  | 469.9    |
| 15 | 54765243  | 54893096  | 127.853  |
| 15 | 54926718  | 55047258  | 120.54   |
| 15 | 55047298  | 55047320  | 0.022    |
| 15 | 55142754  | 55608192  | 465.438  |
| 15 | 55813242  | 56860408  | 1047.166 |
| 15 | 56928759  | 58080342  | 1151.583 |
| 15 | 60004071  | 61030300  | 1026.229 |
| 15 | 61458700  | 61496157  | 37.457   |
| 15 | 61585855  | 62526148  | 940.293  |
| 15 | 63162245  | 64662620  | 1500.375 |
| 15 | 65013311  | 65165329  | 152.018  |
| 15 | 65477712  | 67245299  | 1767.587 |
| 15 | 67486989  | 70001099  | 2514.11  |
| 15 | 70020494  | 71118424  | 1097.93  |
| 15 | 74558743  | 75619170  | 1060.427 |
| 15 | 75640882  | 75641006  | 0.124    |
| 15 | 76600776  | 76972605  | 371.829  |
| 15 | 76976803  | 77223842  | 247.039  |
| 15 | 77279980  | 78327794  | 1047.814 |
| 15 | 78378561  | 78386892  | 8.331    |
| 15 | 78435794  | 78578475  | 142.681  |
| 15 | 78682551  | 78894257  | 211.706  |
| 15 | 78935746  | 79057679  | 121.933  |
| 15 | 79076045  | 79198999  | 122.954  |
| 15 | 79232620  | 80654848  | 1422.228 |
| 15 | 80756250  | 83184093  | 2427.843 |
| 15 | 94594661  | 97091347  | 2496.686 |
| 15 | 97218699  | 97619005  | 400.306  |
| 15 | 97658765  | 98015636  | 356.871  |
| 15 | 98062196  | 99033104  | 970.908  |
| 15 | 101951842 | 102558564 | 606.722  |
| 15 | 102926612 | 103296166 | 369.554  |
| 15 | 103298350 | 104157848 | 859.498  |
| 15 | 109619433 | 110970058 | 1350.625 |
| 15 | 111115012 | 111819772 | 704.76   |
| 15 | 111846721 | 112053414 | 206.693  |
| 15 | 112053442 | 112066972 | 13.53    |
| 15 | 112102189 | 112467056 | 364.867  |
| 15 | 112850743 | 112850770 | 0.027    |
| 15 | 112884286 | 112923166 | 38.88    |
| 15 | 113095189 | 113189227 | 94.038   |
| 15 | 113196972 | 113225978 | 29.006   |
| 15 | 113249786 | 113256958 | 7.172    |
| 15 | 113297177 | 113327593 | 30.416   |
| 15 | 113333482 | 113346942 | 13.46    |
| 15 | 113363299 | 113574247 | 210.948  |
| 15 | 113574253 | 113659811 | 85.558   |
| 15 | 113866133 | 114021240 | 155.107  |
| 15 | 114064966 | 114139064 | 74.098   |
| 15 | 114183505 | 114250806 | 67.301   |
| 15 | 114319318 | 114335621 | 16.303   |
| 15 | 114362512 | 114824889 | 462.377  |
| 15 | 114948250 | 115081269 | 133.019  |
| 15 | 115132816 | 115137470 | 4.654    |
| 15 | 115249185 | 115970960 | 721.775  |
| 15 | 115978042 | 116102533 | 124.491  |

|    |           |           |         |
|----|-----------|-----------|---------|
| 15 | 116244170 | 116836841 | 592.671 |
| 15 | 116870170 | 117162803 | 292.633 |
| 15 | 117167269 | 117393299 | 226.03  |
| 15 | 117447301 | 117486036 | 38.735  |
| 15 | 117624932 | 117644673 | 19.741  |
| 15 | 117696310 | 117779475 | 83.165  |
| 15 | 117987481 | 118221613 | 234.132 |
| 15 | 118307854 | 118348828 | 40.974  |
| 15 | 118414994 | 118551981 | 136.987 |
| 15 | 118604967 | 119008487 | 403.52  |
| 15 | 119209916 | 119688158 | 478.242 |
| 15 | 119689135 | 119710912 | 21.777  |
| 15 | 119754640 | 119863636 | 108.996 |
| 15 | 119922656 | 120547602 | 624.946 |
| 15 | 120669360 | 120698909 | 29.549  |
| 15 | 120708729 | 120747014 | 38.285  |
| 15 | 120791747 | 120972897 | 181.15  |
| 15 | 121018287 | 121021959 | 3.672   |
| 15 | 121021968 | 121156279 | 134.311 |
| 15 | 121295519 | 122282828 | 987.309 |
| 15 | 122408089 | 122939075 | 530.986 |
| 15 | 122990653 | 123019451 | 28.798  |
| 15 | 123020308 | 123069986 | 49.678  |
| 15 | 123070062 | 123263621 | 193.559 |
| 15 | 123533865 | 123569980 | 36.115  |
| 15 | 123578936 | 123742870 | 163.934 |
| 15 | 123911459 | 124422438 | 510.979 |
| 15 | 124434931 | 124437665 | 2.734   |
| 15 | 124461831 | 124531882 | 70.051  |
| 15 | 124582653 | 124582777 | 0.124   |
| 15 | 124600326 | 124626885 | 26.559  |
| 15 | 124638792 | 124638803 | 0.011   |
| 15 | 124655400 | 124904308 | 248.908 |
| 15 | 125092606 | 125158363 | 65.757  |
| 15 | 125174375 | 125177709 | 3.334   |
| 15 | 125288325 | 125389625 | 101.3   |
| 15 | 125390581 | 125514812 | 124.231 |
| 15 | 125540067 | 125557762 | 17.695  |
| 15 | 125565716 | 125568233 | 2.517   |
| 15 | 125578141 | 125768262 | 190.121 |
| 15 | 125854620 | 125883334 | 28.714  |
| 15 | 125887401 | 125897090 | 9.689   |
| 15 | 126042066 | 126202326 | 160.26  |
| 15 | 126238966 | 126346015 | 107.049 |
| 15 | 126347844 | 126387674 | 39.83   |
| 15 | 126412175 | 126435833 | 23.658  |
| 15 | 126673457 | 126869614 | 196.157 |
| 15 | 126872462 | 126982699 | 110.237 |
| 15 | 127007267 | 127065929 | 58.662  |
| 15 | 127065965 | 127066107 | 0.142   |
| 15 | 127098809 | 127100279 | 1.47    |
| 15 | 127146332 | 127255821 | 109.489 |
| 15 | 127255822 | 127314779 | 58.957  |
| 15 | 127324207 | 127380596 | 56.389  |
| 15 | 127380627 | 127463653 | 83.026  |
| 15 | 127568285 | 127613802 | 45.517  |
| 15 | 127614312 | 127687213 | 72.901  |
| 15 | 127765364 | 127765385 | 0.021   |
| 15 | 127799281 | 127812908 | 13.627  |
| 15 | 127832423 | 127832589 | 0.166   |
| 15 | 127853034 | 127927702 | 74.668  |



|    |           |           |         |
|----|-----------|-----------|---------|
| 15 | 127978543 | 127980556 | 2.013   |
| 15 | 127985544 | 127991510 | 5.966   |
| 15 | 128002677 | 128029123 | 26.446  |
| 15 | 128101923 | 128241490 | 139.567 |
| 15 | 128268945 | 128269068 | 0.123   |
| 15 | 128292899 | 128410765 | 117.866 |
| 15 | 128458380 | 128474244 | 15.864  |
| 15 | 128498493 | 128627886 | 129.393 |
| 15 | 128699966 | 128744597 | 44.631  |
| 15 | 128748043 | 128748097 | 0.054   |
| 15 | 128792940 | 128797711 | 4.771   |
| 15 | 128803762 | 128814172 | 10.41   |
| 15 | 128814327 | 128815902 | 1.575   |
| 15 | 128910360 | 128985673 | 75.313  |
| 15 | 128985676 | 128987312 | 1.636   |
| 15 | 128987313 | 129001188 | 13.875  |
| 15 | 129011610 | 129071133 | 59.523  |
| 15 | 129086007 | 129133977 | 47.97   |
| 15 | 129286430 | 129288811 | 2.381   |
| 15 | 129300253 | 129301523 | 1.27    |
| 15 | 129371046 | 129402281 | 31.235  |
| 15 | 129402737 | 129457959 | 55.222  |
| 15 | 129457969 | 129484101 | 26.132  |
| 15 | 129487604 | 129488882 | 1.278   |
| 15 | 129496177 | 129590668 | 94.491  |
| 15 | 129598532 | 129633234 | 34.702  |
| 15 | 129662957 | 129680417 | 17.46   |
| 15 | 129682039 | 129697195 | 15.156  |
| 15 | 129704230 | 129704681 | 0.451   |
| 15 | 129707538 | 129718754 | 11.216  |
| 15 | 129718781 | 129823383 | 104.602 |
| 15 | 129823863 | 129830761 | 6.898   |
| 15 | 129831976 | 129844768 | 12.792  |
| 15 | 129866751 | 129877639 | 10.888  |
| 15 | 129890630 | 129907063 | 16.433  |
| 15 | 129932411 | 129963240 | 30.829  |
| 15 | 129963262 | 129963380 | 0.118   |
| 15 | 129966674 | 129980849 | 14.175  |
| 15 | 129982244 | 129984688 | 2.444   |
| 15 | 129989992 | 129995222 | 5.23    |
| 15 | 129996886 | 130162790 | 165.904 |
| 15 | 130307770 | 130307889 | 0.119   |
| 15 | 130331459 | 130357122 | 25.663  |
| 15 | 130407899 | 130447106 | 39.207  |
| 15 | 130510544 | 130603027 | 92.483  |
| 15 | 130610776 | 130700985 | 90.209  |
| 15 | 130704141 | 130736042 | 31.901  |
| 15 | 130768016 | 130770354 | 2.338   |
| 15 | 130771904 | 130772103 | 0.199   |
| 15 | 130803227 | 130951688 | 148.461 |
| 15 | 130958494 | 130973994 | 15.5    |
| 15 | 130994682 | 131002286 | 7.604   |
| 15 | 131018738 | 131044084 | 25.346  |
| 15 | 131046149 | 131099803 | 53.654  |
| 15 | 131110643 | 131132906 | 22.263  |
| 15 | 131141409 | 131167093 | 25.684  |
| 15 | 131175908 | 131176066 | 0.158   |
| 15 | 131176694 | 131197010 | 20.316  |
| 15 | 131204726 | 131221348 | 16.622  |
| 15 | 131259671 | 131294502 | 34.831  |
| 15 | 131473212 | 131635766 | 162.554 |

|    |           |           |         |
|----|-----------|-----------|---------|
| 15 | 131648307 | 131668390 | 20.083  |
| 15 | 131682093 | 131705832 | 23.739  |
| 15 | 131738413 | 131748661 | 10.248  |
| 15 | 131748803 | 131786017 | 37.214  |
| 15 | 131797653 | 131797661 | 0.008   |
| 15 | 131797981 | 131798170 | 0.189   |
| 15 | 131799034 | 131908449 | 109.415 |
| 15 | 131956459 | 131961650 | 5.191   |
| 15 | 131968512 | 131992980 | 24.468  |
| 15 | 132019241 | 132019476 | 0.235   |
| 15 | 132023614 | 132027959 | 4.345   |
| 15 | 132034391 | 132039886 | 5.495   |
| 15 | 132040105 | 132055882 | 15.777  |
| 15 | 132085417 | 132174598 | 89.181  |
| 15 | 132187611 | 132220331 | 32.72   |
| 15 | 132222636 | 132222674 | 0.038   |
| 15 | 132222889 | 132222918 | 0.029   |
| 15 | 132222929 | 132223005 | 0.076   |
| 15 | 132223080 | 132223129 | 0.049   |
| 15 | 132223234 | 132223264 | 0.03    |
| 15 | 132223369 | 132223493 | 0.124   |
| 15 | 132223837 | 132227269 | 3.432   |
| 15 | 132234491 | 132234504 | 0.013   |
| 15 | 132234983 | 132235061 | 0.078   |
| 15 | 132235900 | 132235946 | 0.046   |
| 15 | 132235949 | 132236348 | 0.399   |
| 15 | 132236389 | 132236725 | 0.336   |
| 15 | 132236770 | 132236889 | 0.119   |
| 15 | 132237173 | 132237231 | 0.058   |
| 15 | 132237280 | 132237289 | 0.009   |
| 15 | 132238062 | 132238125 | 0.063   |
| 15 | 132238137 | 132238282 | 0.145   |
| 15 | 132244252 | 132257935 | 13.683  |
| 15 | 132258974 | 132265521 | 6.547   |
| 15 | 132268156 | 132268295 | 0.139   |
| 15 | 132270902 | 132271981 | 1.079   |
| 15 | 132287104 | 132290162 | 3.058   |
| 15 | 132297643 | 132297732 | 0.089   |
| 15 | 132297776 | 132298658 | 0.882   |
| 15 | 132298741 | 132299727 | 0.986   |
| 15 | 132300389 | 132300415 | 0.026   |
| 15 | 132300474 | 132300535 | 0.061   |
| 15 | 132300540 | 132300565 | 0.025   |
| 15 | 132301667 | 132301868 | 0.201   |
| 15 | 132302036 | 132303435 | 1.399   |
| 15 | 132303575 | 132303623 | 0.048   |
| 15 | 132304994 | 132305041 | 0.047   |
| 15 | 132306303 | 132306325 | 0.022   |
| 15 | 132306370 | 132307028 | 0.658   |
| 15 | 132307089 | 132307100 | 0.011   |
| 15 | 132307154 | 132308639 | 1.485   |
| 15 | 132309139 | 132310056 | 0.917   |
| 15 | 132310087 | 132311254 | 1.167   |
| 15 | 132312719 | 132312754 | 0.035   |
| 15 | 132312755 | 132316338 | 3.583   |
| 15 | 132317438 | 132317645 | 0.207   |
| 15 | 132317663 | 132317800 | 0.137   |
| 15 | 132317946 | 132318006 | 0.06    |
| 15 | 132319256 | 132319269 | 0.013   |
| 15 | 132319568 | 132319619 | 0.051   |
| 15 | 132319769 | 132319918 | 0.149   |

|    |           |           |        |
|----|-----------|-----------|--------|
| 15 | 132319927 | 132320132 | 0.205  |
| 15 | 132320883 | 132339130 | 18.247 |
| 15 | 132340376 | 132363429 | 23.053 |
| 15 | 132363478 | 132375336 | 11.858 |
| 15 | 132379058 | 132379228 | 0.17   |
| 15 | 132379466 | 132385210 | 5.744  |
| 15 | 132388473 | 132388493 | 0.02   |
| 15 | 132392191 | 132392237 | 0.046  |
| 15 | 132399449 | 132409627 | 10.178 |
| 15 | 132409666 | 132409906 | 0.24   |
| 15 | 132411629 | 132412250 | 0.621  |
| 15 | 132413574 | 132429250 | 15.676 |
| 15 | 132429256 | 132432598 | 3.342  |
| 15 | 132432614 | 132432852 | 0.238  |
| 15 | 132439943 | 132441233 | 1.29   |
| 15 | 132442197 | 132442276 | 0.079  |
| 15 | 132443082 | 132443162 | 0.08   |
| 15 | 132444604 | 132444621 | 0.017  |
| 15 | 132444850 | 132445811 | 0.961  |
| 15 | 132445887 | 132445927 | 0.04   |
| 15 | 132447538 | 132447578 | 0.04   |
| 15 | 132447598 | 132447620 | 0.022  |
| 15 | 132451224 | 132455115 | 3.891  |
| 15 | 132455271 | 132455312 | 0.041  |
| 15 | 132458766 | 132459679 | 0.913  |
| 15 | 132459689 | 132459865 | 0.176  |
| 15 | 132459904 | 132460443 | 0.539  |
| 15 | 132460547 | 132460637 | 0.09   |
| 15 | 132462345 | 132462409 | 0.064  |
| 15 | 132462889 | 132480322 | 17.433 |
| 15 | 132481584 | 132492360 | 10.776 |
| 15 | 132493494 | 132493955 | 0.461  |
| 15 | 132494311 | 132495009 | 0.698  |
| 15 | 132495047 | 132495269 | 0.222  |
| 15 | 132495529 | 132495543 | 0.014  |
| 15 | 132496053 | 132496079 | 0.026  |
| 15 | 132496736 | 132496882 | 0.146  |
| 15 | 132497214 | 132497247 | 0.033  |
| 15 | 132497268 | 132497298 | 0.03   |
| 15 | 132497352 | 132497520 | 0.168  |
| 15 | 132498587 | 132498590 | 0.003  |
| 15 | 132499150 | 132499194 | 0.044  |
| 15 | 132503963 | 132504014 | 0.051  |
| 15 | 132506299 | 132510930 | 4.631  |
| 15 | 132511824 | 132514824 | 3      |
| 15 | 132515000 | 132515202 | 0.202  |
| 15 | 132515364 | 132515403 | 0.039  |
| 15 | 132515789 | 132517056 | 1.267  |
| 15 | 132531834 | 132541328 | 9.494  |
| 15 | 132542153 | 132542184 | 0.031  |
| 15 | 132542190 | 132542904 | 0.714  |
| 15 | 132543402 | 132543421 | 0.019  |
| 15 | 132543441 | 132544057 | 0.616  |
| 15 | 132546834 | 132546852 | 0.018  |
| 15 | 132547306 | 132547347 | 0.041  |
| 15 | 132560159 | 132560232 | 0.073  |
| 15 | 132563456 | 132564787 | 1.331  |
| 15 | 132583199 | 132583267 | 0.068  |
| 15 | 132583270 | 132585399 | 2.129  |
| 15 | 132585441 | 132585500 | 0.059  |
| 15 | 132585796 | 132598067 | 12.271 |

|    |           |           |         |
|----|-----------|-----------|---------|
| 15 | 132600516 | 132601546 | 1.03    |
| 15 | 132601573 | 132601655 | 0.082   |
| 15 | 132607484 | 132607504 | 0.02    |
| 15 | 132607663 | 132607693 | 0.03    |
| 15 | 132607839 | 132608624 | 0.785   |
| 15 | 132609745 | 132614698 | 4.953   |
| 15 | 132616161 | 132616211 | 0.05    |
| 15 | 132620752 | 132621461 | 0.709   |
| 15 | 132623384 | 132623398 | 0.014   |
| 15 | 132625933 | 132625958 | 0.025   |
| 15 | 132626423 | 132626492 | 0.069   |
| 15 | 132627952 | 132631978 | 4.026   |
| 15 | 132640083 | 132640344 | 0.261   |
| 15 | 132641970 | 132643116 | 1.146   |
| 15 | 132650900 | 132652013 | 1.113   |
| 15 | 132659597 | 132659775 | 0.178   |
| 15 | 132659790 | 132660571 | 0.781   |
| 15 | 132660582 | 132660813 | 0.231   |
| 15 | 132661228 | 132661713 | 0.485   |
| 15 | 132664839 | 132664891 | 0.052   |
| 15 | 132664898 | 132664951 | 0.053   |
| 15 | 132665038 | 132665085 | 0.047   |
| 15 | 132665777 | 132665780 | 0.003   |
| 15 | 132666236 | 132666284 | 0.048   |
| 15 | 132666665 | 132666863 | 0.198   |
| 15 | 132668275 | 132668320 | 0.045   |
| 15 | 132669119 | 132669167 | 0.048   |
| 15 | 132671043 | 132671273 | 0.23    |
| 15 | 132671277 | 132671324 | 0.047   |
| 15 | 132671461 | 132671514 | 0.053   |
| 15 | 132671555 | 132671610 | 0.055   |
| 15 | 132671615 | 132671667 | 0.052   |
| 15 | 132672210 | 132672598 | 0.388   |
| 15 | 132673298 | 132673349 | 0.051   |
| 15 | 132673357 | 132673415 | 0.058   |
| 15 | 132673432 | 132673574 | 0.142   |
| 15 | 132673794 | 132675181 | 1.387   |
| 15 | 132676358 | 132676523 | 0.165   |
| 15 | 132676573 | 132677923 | 1.35    |
| 15 | 132681470 | 132682524 | 1.054   |
| 15 | 132685493 | 132685882 | 0.389   |
| 15 | 132688961 | 132689283 | 0.322   |
| 15 | 132689597 | 132689616 | 0.019   |
| 15 | 132709361 | 132720022 | 10.661  |
| 15 | 132722963 | 132723141 | 0.178   |
| 15 | 132723156 | 132723164 | 0.008   |
| 15 | 132724267 | 132724313 | 0.046   |
| 15 | 132740009 | 132742521 | 2.512   |
| 15 | 132743137 | 132743294 | 0.157   |
| 15 | 132743592 | 132743652 | 0.06    |
| 15 | 132743653 | 132868007 | 124.354 |
| 15 | 133017108 | 133619772 | 602.664 |
| 15 | 133639521 | 133754195 | 114.674 |
| 15 | 133815720 | 133832631 | 16.911  |
| 15 | 134038892 | 134073857 | 34.965  |
| 15 | 134120387 | 134357303 | 236.916 |
| 15 | 134357547 | 134357801 | 0.254   |
| 15 | 134375445 | 134390816 | 15.371  |
| 15 | 134395015 | 134413746 | 18.731  |
| 15 | 134415498 | 134418526 | 3.028   |
| 15 | 134421998 | 134422037 | 0.039   |

|    |           |           |          |
|----|-----------|-----------|----------|
| 15 | 134448734 | 134449383 | 0.649    |
| 15 | 134449563 | 134449577 | 0.014    |
| 15 | 134449590 | 134490806 | 41.216   |
| 15 | 134505589 | 134532135 | 26.546   |
| 15 | 134533229 | 134533433 | 0.204    |
| 15 | 134538955 | 134539088 | 0.133    |
| 16 | 636362    | 1207495   | 571.133  |
| 16 | 1335809   | 1351104   | 15.295   |
| 16 | 1695977   | 2063166   | 367.189  |
| 16 | 2485133   | 2721991   | 236.858  |
| 16 | 2722006   | 2738280   | 16.274   |
| 16 | 2834722   | 2839741   | 5.019    |
| 16 | 2903735   | 2974610   | 70.875   |
| 16 | 2996601   | 3003729   | 7.128    |
| 16 | 3021671   | 3055761   | 34.09    |
| 16 | 3069885   | 3115803   | 45.918   |
| 16 | 3121834   | 3200556   | 78.722   |
| 16 | 3201921   | 3210226   | 8.305    |
| 16 | 3225822   | 3239432   | 13.61    |
| 16 | 3256376   | 3365694   | 109.318  |
| 16 | 3382704   | 3398862   | 16.158   |
| 16 | 3432668   | 3443105   | 10.437   |
| 16 | 3508666   | 4001273   | 492.607  |
| 16 | 4462484   | 4462510   | 0.026    |
| 16 | 4519298   | 4814458   | 295.16   |
| 16 | 4834748   | 4841695   | 6.947    |
| 16 | 5046385   | 5157080   | 110.695  |
| 16 | 5169397   | 5169425   | 0.028    |
| 16 | 5169438   | 5183036   | 13.598   |
| 16 | 5349993   | 5373780   | 23.787   |
| 16 | 5415525   | 5468559   | 53.034   |
| 16 | 5477626   | 5484813   | 7.187    |
| 16 | 5484825   | 5580399   | 95.574   |
| 16 | 5650607   | 5732724   | 82.117   |
| 16 | 5974482   | 6093449   | 118.967  |
| 16 | 6093518   | 6351287   | 257.769  |
| 16 | 6567850   | 6807819   | 239.969  |
| 16 | 6848681   | 7658671   | 809.99   |
| 16 | 7840760   | 7840799   | 0.039    |
| 16 | 8670402   | 9190967   | 520.565  |
| 16 | 10161376  | 10860874  | 699.498  |
| 16 | 11373818  | 14751607  | 3377.789 |
| 16 | 14906246  | 15696164  | 789.918  |
| 16 | 15697728  | 15697741  | 0.013    |
| 16 | 15713824  | 15941758  | 227.934  |
| 16 | 15973258  | 15990528  | 17.27    |
| 16 | 15990574  | 16332786  | 342.212  |
| 16 | 16374896  | 16875110  | 500.214  |
| 16 | 17521744  | 17569109  | 47.365   |
| 16 | 17569260  | 17609198  | 39.938   |
| 16 | 17789528  | 17829084  | 39.556   |
| 16 | 18069074  | 18191422  | 122.348  |
| 16 | 18225382  | 18257864  | 32.482   |
| 16 | 18373706  | 18373711  | 0.005    |
| 16 | 18552370  | 18676926  | 124.556  |
| 16 | 18784647  | 19003405  | 218.758  |
| 16 | 19031822  | 19382414  | 350.592  |
| 16 | 19403405  | 20403858  | 1000.453 |
| 16 | 20403892  | 20939228  | 535.336  |
| 16 | 21007551  | 21014022  | 6.471    |
| 16 | 21201710  | 21407044  | 205.334  |

|    |          |          |          |
|----|----------|----------|----------|
| 16 | 21462320 | 21535837 | 73.517   |
| 16 | 21653960 | 22105156 | 451.196  |
| 16 | 22185609 | 22511054 | 325.445  |
| 16 | 22766508 | 22829231 | 62.723   |
| 16 | 22886149 | 23158267 | 272.118  |
| 16 | 23214773 | 23874455 | 659.682  |
| 16 | 24542691 | 24593749 | 51.058   |
| 16 | 24827908 | 24827926 | 0.018    |
| 16 | 24868467 | 24906337 | 37.87    |
| 16 | 24962210 | 24962305 | 0.095    |
| 16 | 24962352 | 24962502 | 0.15     |
| 16 | 24962645 | 24962742 | 0.097    |
| 16 | 24969138 | 24969173 | 0.035    |
| 16 | 24999143 | 25315211 | 316.068  |
| 16 | 25370927 | 25582564 | 211.637  |
| 16 | 25585886 | 27430241 | 1844.355 |
| 16 | 30501914 | 31153796 | 651.882  |
| 16 | 31404523 | 31407328 | 2.805    |
| 16 | 31409581 | 31686015 | 276.434  |
| 16 | 31843517 | 32269271 | 425.754  |
| 16 | 32269274 | 32340107 | 70.833   |
| 16 | 32340170 | 32340194 | 0.024    |
| 16 | 32340222 | 32344383 | 4.161    |
| 16 | 32345452 | 32532710 | 187.258  |
| 16 | 32785074 | 33188578 | 403.504  |
| 16 | 33190552 | 33565795 | 375.243  |
| 16 | 33635900 | 34398986 | 763.086  |
| 16 | 34432838 | 35243366 | 810.528  |
| 16 | 35615850 | 35960893 | 345.043  |
| 16 | 36252209 | 36928929 | 676.72   |
| 16 | 37022840 | 37579183 | 556.343  |
| 16 | 37643886 | 37762932 | 119.046  |
| 16 | 38098634 | 38505106 | 406.472  |
| 16 | 38541755 | 38798292 | 256.537  |
| 16 | 38931731 | 38931737 | 0.006    |
| 16 | 38931892 | 40565692 | 1633.8   |
| 16 | 40713762 | 42005454 | 1291.692 |
| 16 | 42027673 | 42066809 | 39.136   |
| 16 | 42093675 | 42662510 | 568.835  |
| 16 | 42713051 | 43065046 | 351.995  |
| 16 | 43076737 | 44020521 | 943.784  |
| 16 | 44291108 | 45030021 | 738.913  |
| 16 | 45066688 | 45338142 | 271.454  |
| 16 | 45551749 | 45603080 | 51.331   |
| 16 | 45607362 | 45680923 | 73.561   |
| 16 | 45736509 | 45864582 | 128.073  |
| 16 | 45896170 | 46459687 | 563.517  |
| 16 | 46472193 | 46771773 | 299.58   |
| 16 | 46771780 | 47209685 | 437.905  |
| 16 | 47209720 | 47237449 | 27.729   |
| 16 | 47455668 | 47806767 | 351.099  |
| 16 | 47809541 | 47810706 | 1.165    |
| 16 | 47842809 | 48055056 | 212.247  |
| 16 | 48145268 | 48653531 | 508.263  |
| 16 | 48669431 | 48896309 | 226.878  |
| 16 | 48899459 | 48971771 | 72.312   |
| 16 | 48988366 | 49041043 | 52.677   |
| 16 | 49041280 | 49090187 | 48.907   |
| 16 | 49131622 | 49162551 | 30.929   |
| 16 | 49201915 | 49252285 | 50.37    |
| 16 | 49272124 | 49442436 | 170.312  |

|    |          |          |         |
|----|----------|----------|---------|
| 16 | 49447078 | 49737381 | 290.303 |
| 16 | 49791749 | 49933617 | 141.868 |
| 16 | 50655758 | 50658463 | 2.705   |
| 16 | 50677108 | 50796438 | 119.33  |
| 16 | 50842829 | 50892453 | 49.624  |
| 16 | 50919604 | 50938844 | 19.24   |
| 16 | 50949114 | 51046607 | 97.493  |
| 16 | 51046612 | 51053712 | 7.1     |
| 16 | 51167113 | 51167139 | 0.026   |
| 16 | 51177898 | 51177921 | 0.023   |
| 16 | 51178862 | 51906608 | 727.746 |
| 16 | 51961902 | 51999379 | 37.477  |
| 16 | 52063957 | 52210193 | 146.236 |
| 16 | 52217831 | 52390904 | 173.073 |
| 16 | 52542473 | 52638165 | 95.692  |
| 16 | 52746595 | 52778900 | 32.305  |
| 16 | 52784369 | 52867409 | 83.04   |
| 16 | 52888121 | 53549761 | 661.64  |
| 16 | 59628470 | 59821037 | 192.567 |
| 16 | 59821042 | 60081178 | 260.136 |
| 16 | 60081198 | 60095887 | 14.689  |
| 16 | 60096875 | 60141466 | 44.591  |
| 16 | 60186474 | 60206022 | 19.548  |
| 16 | 60387386 | 60423054 | 35.668  |
| 16 | 60518890 | 60797369 | 278.479 |
| 16 | 60798844 | 60845672 | 46.828  |
| 16 | 60845797 | 60971284 | 125.487 |
| 16 | 60971500 | 61024992 | 53.492  |
| 16 | 61102851 | 61158481 | 55.63   |
| 16 | 61268113 | 61764057 | 495.944 |
| 16 | 61806247 | 61996033 | 189.786 |
| 16 | 62089394 | 62522553 | 433.159 |
| 16 | 62581154 | 62643100 | 61.946  |
| 16 | 62921142 | 63178391 | 257.249 |
| 16 | 63244724 | 63251702 | 6.978   |
| 16 | 63385108 | 63538407 | 153.299 |
| 16 | 63588177 | 63839451 | 251.274 |
| 16 | 63924553 | 64138851 | 214.298 |
| 16 | 64325224 | 64846844 | 521.62  |
| 16 | 64860703 | 65336976 | 476.273 |
| 16 | 65336979 | 65506545 | 169.566 |
| 16 | 65523322 | 65620120 | 96.798  |
| 16 | 65635903 | 65915866 | 279.963 |
| 16 | 65937662 | 65938446 | 0.784   |
| 16 | 66097184 | 66147555 | 50.371  |
| 16 | 66154503 | 66160022 | 5.519   |
| 16 | 66212890 | 66239053 | 26.163  |
| 16 | 66407597 | 66490446 | 82.849  |
| 16 | 66490978 | 66643328 | 152.35  |
| 16 | 66656552 | 66819781 | 163.229 |
| 16 | 66863788 | 67288617 | 424.829 |
| 16 | 67753777 | 68137296 | 383.519 |
| 16 | 68169236 | 68455783 | 286.547 |
| 16 | 68497948 | 68498049 | 0.101   |
| 16 | 68710932 | 68734060 | 23.128  |
| 16 | 68745244 | 68748104 | 2.86    |
| 16 | 68748374 | 68750426 | 2.052   |
| 16 | 68750467 | 68750500 | 0.033   |
| 16 | 68765556 | 68771822 | 6.266   |
| 16 | 68778860 | 68822741 | 43.881  |
| 16 | 68851414 | 68864633 | 13.219  |

|    |          |          |         |
|----|----------|----------|---------|
| 16 | 68878600 | 69242574 | 363.974 |
| 16 | 69265296 | 69326717 | 61.421  |
| 16 | 69344294 | 69347524 | 3.23    |
| 16 | 69370435 | 69466542 | 96.107  |
| 16 | 69466544 | 69486597 | 20.053  |
| 16 | 69486619 | 69815991 | 329.372 |
| 16 | 69938751 | 70090197 | 151.446 |
| 16 | 70222398 | 70255110 | 32.712  |
| 16 | 70259719 | 70282365 | 22.646  |
| 16 | 70362696 | 70418181 | 55.485  |
| 16 | 70429043 | 70432263 | 3.22    |
| 16 | 70520625 | 70527431 | 6.806   |
| 16 | 70574296 | 70610933 | 36.637  |
| 16 | 70721865 | 71003001 | 281.136 |
| 16 | 71036571 | 71036586 | 0.015   |
| 16 | 71110382 | 71260082 | 149.7   |
| 16 | 71317719 | 71345016 | 27.297  |
| 16 | 71345038 | 71431732 | 86.694  |
| 16 | 71518640 | 71535702 | 17.062  |
| 16 | 71588207 | 71633782 | 45.575  |
| 16 | 71639602 | 72275884 | 636.282 |
| 16 | 72316741 | 72348455 | 31.714  |
| 16 | 72351895 | 72448500 | 96.605  |
| 16 | 72450670 | 72489451 | 38.781  |
| 16 | 72527992 | 72590923 | 62.931  |
| 16 | 72603831 | 72626772 | 22.941  |
| 16 | 72628707 | 72641055 | 12.348  |
| 16 | 72641192 | 72664136 | 22.944  |
| 16 | 72751964 | 72802580 | 50.616  |
| 16 | 72838886 | 72878651 | 39.765  |
| 16 | 72883428 | 72924712 | 41.284  |
| 16 | 72938627 | 72939832 | 1.205   |
| 16 | 72967264 | 73064763 | 97.499  |
| 16 | 73066162 | 73112983 | 46.821  |
| 16 | 73144379 | 73368438 | 224.059 |
| 16 | 73400979 | 73401144 | 0.165   |
| 16 | 73423950 | 73504516 | 80.566  |
| 16 | 73521058 | 73567184 | 46.126  |
| 16 | 73572342 | 73622992 | 50.65   |
| 16 | 73664161 | 73799629 | 135.468 |
| 16 | 73811155 | 73895936 | 84.781  |
| 16 | 73901220 | 74044840 | 143.62  |
| 16 | 74088789 | 74171932 | 83.143  |
| 16 | 74208984 | 74282333 | 73.349  |
| 16 | 74282342 | 74282805 | 0.463   |
| 16 | 74311897 | 74399109 | 87.212  |
| 16 | 74400372 | 74793860 | 393.488 |
| 16 | 74798418 | 74807892 | 9.474   |
| 16 | 74881592 | 75073774 | 192.182 |
| 16 | 75086296 | 75086456 | 0.16    |
| 16 | 75121358 | 75132609 | 11.251  |
| 16 | 75154857 | 75235314 | 80.457  |
| 16 | 75248984 | 75274504 | 25.52   |
| 16 | 75303167 | 75303433 | 0.266   |
| 16 | 75309967 | 75346135 | 36.168  |
| 16 | 75355217 | 75374583 | 19.366  |
| 16 | 75383440 | 75730511 | 347.071 |
| 16 | 75810549 | 75833175 | 22.626  |
| 16 | 76004700 | 76015717 | 11.017  |
| 16 | 76143098 | 76144303 | 1.205   |
| 16 | 76152546 | 76187959 | 35.413  |



|    |          |          |         |
|----|----------|----------|---------|
| 16 | 76190368 | 76210976 | 20.608  |
| 16 | 76215668 | 76224397 | 8.729   |
| 16 | 76237334 | 76329975 | 92.641  |
| 16 | 76340602 | 76353327 | 12.725  |
| 16 | 76353332 | 76363623 | 10.291  |
| 16 | 76365566 | 76442645 | 77.079  |
| 16 | 76442694 | 76484196 | 41.502  |
| 16 | 76490600 | 76505829 | 15.229  |
| 16 | 76510580 | 76533854 | 23.274  |
| 16 | 76550105 | 76552552 | 2.447   |
| 16 | 76603831 | 76611999 | 8.168   |
| 16 | 76623885 | 76650841 | 26.956  |
| 16 | 76663990 | 76734579 | 70.589  |
| 16 | 76745905 | 76777174 | 31.269  |
| 16 | 76839885 | 76848969 | 9.084   |
| 16 | 76877020 | 76886933 | 9.913   |
| 16 | 76905187 | 76924800 | 19.613  |
| 16 | 76924876 | 76924951 | 0.075   |
| 16 | 76927347 | 76927384 | 0.037   |
| 16 | 76944800 | 76945035 | 0.235   |
| 16 | 76945053 | 76946055 | 1.002   |
| 16 | 76946464 | 76946480 | 0.016   |
| 16 | 76948389 | 76950048 | 1.659   |
| 16 | 76950121 | 76950160 | 0.039   |
| 16 | 76961483 | 76961503 | 0.02    |
| 16 | 76963068 | 76963126 | 0.058   |
| 16 | 76963467 | 76963503 | 0.036   |
| 16 | 76963701 | 76965228 | 1.527   |
| 16 | 76982907 | 76983041 | 0.134   |
| 16 | 77012349 | 77012379 | 0.03    |
| 16 | 77012520 | 77012669 | 0.149   |
| 16 | 77012946 | 77013287 | 0.341   |
| 16 | 77017813 | 77018734 | 0.921   |
| 16 | 77023878 | 77027983 | 4.105   |
| 16 | 77030251 | 77030306 | 0.055   |
| 16 | 77033274 | 77033280 | 0.006   |
| 16 | 77034109 | 77034133 | 0.024   |
| 16 | 77041460 | 77043849 | 2.389   |
| 16 | 77047215 | 77048542 | 1.327   |
| 16 | 77055004 | 77055071 | 0.067   |
| 16 | 77060254 | 77060261 | 0.007   |
| 16 | 77068095 | 77068334 | 0.239   |
| 16 | 77070858 | 77071274 | 0.416   |
| 16 | 77071286 | 77073070 | 1.784   |
| 16 | 77073794 | 77075693 | 1.899   |
| 16 | 77087561 | 77169927 | 82.366  |
| 16 | 77183627 | 77184385 | 0.758   |
| 16 | 77184388 | 77218780 | 34.392  |
| 16 | 77240908 | 77277334 | 36.426  |
| 16 | 77291623 | 77294244 | 2.621   |
| 16 | 77297071 | 77308372 | 11.301  |
| 16 | 77308387 | 77390047 | 81.66   |
| 16 | 77398778 | 77423852 | 25.074  |
| 17 | 47667    | 47672    | 0.005   |
| 17 | 50396    | 69731    | 19.335  |
| 17 | 215199   | 270787   | 55.588  |
| 17 | 279092   | 355003   | 75.911  |
| 17 | 477534   | 623542   | 146.008 |
| 17 | 647327   | 691222   | 43.895  |
| 17 | 735381   | 1668286  | 932.905 |
| 17 | 3755054  | 4700354  | 945.3   |

|    |          |          |          |
|----|----------|----------|----------|
| 17 | 5034749  | 6331437  | 1296.688 |
| 17 | 7683437  | 7859695  | 176.258  |
| 17 | 7990963  | 8380625  | 389.662  |
| 17 | 8383677  | 8383830  | 0.153    |
| 17 | 8385040  | 8385558  | 0.518    |
| 17 | 8417509  | 8418084  | 0.575    |
| 17 | 8432385  | 9142933  | 710.548  |
| 17 | 9142957  | 9149120  | 6.163    |
| 17 | 9158903  | 9347147  | 188.244  |
| 17 | 9355384  | 9584325  | 228.941  |
| 17 | 9708064  | 9753244  | 45.18    |
| 17 | 9863740  | 10367316 | 503.576  |
| 17 | 11367830 | 11738190 | 370.36   |
| 17 | 11915989 | 11924690 | 8.701    |
| 17 | 12006740 | 12018945 | 12.205   |
| 17 | 12030081 | 12185763 | 155.682  |
| 17 | 12390379 | 12476357 | 85.978   |
| 17 | 12481207 | 12734760 | 253.553  |
| 17 | 12993629 | 12993794 | 0.165    |
| 17 | 12994923 | 12995502 | 0.579    |
| 17 | 12998218 | 12998240 | 0.022    |
| 17 | 13000926 | 13007556 | 6.63     |
| 17 | 13027405 | 13037241 | 9.836    |
| 17 | 13041528 | 13063353 | 21.825   |
| 17 | 13077170 | 13077264 | 0.094    |
| 17 | 13208614 | 13970911 | 762.297  |
| 17 | 14148508 | 15920254 | 1771.746 |
| 17 | 17052513 | 17639900 | 587.387  |
| 17 | 17652818 | 17854666 | 201.848  |
| 17 | 17854686 | 18024201 | 169.515  |
| 17 | 18060226 | 18927602 | 867.376  |
| 17 | 19238514 | 19835539 | 597.025  |
| 17 | 19846992 | 19897197 | 50.205   |
| 17 | 19933942 | 20473747 | 539.805  |
| 17 | 25509633 | 26325535 | 815.902  |
| 17 | 26484721 | 26543430 | 58.709   |
| 17 | 26547630 | 26721132 | 173.502  |
| 17 | 26847164 | 26856602 | 9.438    |
| 17 | 26879430 | 26913637 | 34.207   |
| 17 | 27006973 | 27497871 | 490.898  |
| 17 | 27514843 | 27677202 | 162.359  |
| 17 | 27762479 | 27890815 | 128.336  |
| 17 | 27957461 | 28138592 | 181.131  |
| 17 | 28219292 | 28404264 | 184.972  |
| 17 | 28435758 | 28451257 | 15.499   |
| 17 | 28606815 | 28797134 | 190.319  |
| 17 | 28974532 | 28995085 | 20.553   |
| 17 | 29208539 | 29293561 | 85.022   |
| 17 | 29372935 | 29375585 | 2.65     |
| 17 | 29470888 | 29498466 | 27.578   |
| 17 | 29861824 | 30089931 | 228.107  |
| 17 | 30190336 | 30434478 | 244.142  |
| 17 | 30498645 | 30769690 | 271.045  |
| 17 | 30830039 | 31186027 | 355.988  |
| 17 | 31186241 | 31375829 | 189.588  |
| 17 | 31491560 | 31535988 | 44.428   |
| 17 | 31548334 | 31593140 | 44.806   |
| 17 | 31594033 | 31671458 | 77.425   |
| 17 | 31671543 | 31673107 | 1.564    |
| 17 | 31781050 | 31781073 | 0.023    |
| 17 | 31787908 | 31864733 | 76.825   |

|    |          |          |         |
|----|----------|----------|---------|
| 17 | 31901134 | 32015790 | 114.656 |
| 17 | 32108872 | 32109971 | 1.099   |
| 17 | 32154458 | 32265033 | 110.575 |
| 17 | 32277014 | 32325442 | 48.428  |
| 17 | 32350461 | 32354662 | 4.201   |
| 17 | 32383152 | 32413057 | 29.905  |
| 17 | 32421993 | 32437549 | 15.556  |
| 17 | 32440333 | 32455821 | 15.488  |
| 17 | 32464365 | 32620015 | 155.65  |
| 17 | 32621410 | 32698663 | 77.253  |
| 17 | 32719699 | 32742894 | 23.195  |
| 17 | 33148069 | 33158479 | 10.41   |
| 17 | 33191283 | 33443753 | 252.47  |
| 17 | 33477424 | 33497730 | 20.306  |
| 17 | 33515218 | 33544749 | 29.531  |
| 17 | 33556748 | 34005935 | 449.187 |
| 17 | 34005949 | 34093670 | 87.721  |
| 17 | 34187866 | 34187894 | 0.028   |
| 17 | 34206246 | 34400408 | 194.162 |
| 17 | 34421087 | 34505222 | 84.135  |
| 17 | 34512123 | 34555222 | 43.099  |
| 17 | 34576496 | 34622270 | 45.774  |
| 17 | 34662028 | 34676149 | 14.121  |
| 17 | 34705795 | 34856554 | 150.759 |
| 17 | 34874259 | 34878924 | 4.665   |
| 17 | 34901568 | 34908632 | 7.064   |
| 17 | 34909269 | 34948183 | 38.914  |
| 17 | 34989931 | 35029507 | 39.576  |
| 17 | 35048081 | 35059734 | 11.653  |
| 17 | 35099249 | 35099286 | 0.037   |
| 17 | 35139821 | 35178916 | 39.095  |
| 17 | 35303312 | 35352517 | 49.205  |
| 17 | 35357622 | 35370378 | 12.756  |
| 17 | 35370441 | 35897846 | 527.405 |
| 17 | 35987181 | 36164057 | 176.876 |
| 17 | 36164069 | 36227345 | 63.276  |
| 17 | 36253147 | 36276170 | 23.023  |
| 17 | 36307459 | 36404294 | 96.835  |
| 17 | 36480130 | 36480242 | 0.112   |
| 17 | 36504671 | 36573290 | 68.619  |
| 17 | 36573429 | 36839235 | 265.806 |
| 17 | 37143551 | 37143563 | 0.012   |
| 17 | 37144178 | 37171155 | 26.977  |
| 17 | 37296670 | 37300289 | 3.619   |
| 17 | 37634120 | 37645155 | 11.035  |
| 17 | 37664879 | 37691405 | 26.526  |
| 17 | 37692383 | 37692427 | 0.044   |
| 17 | 37766972 | 38005692 | 238.72  |
| 17 | 38087838 | 38119856 | 32.018  |
| 17 | 38322883 | 38339700 | 16.817  |
| 17 | 38365484 | 38374583 | 9.099   |
| 17 | 38410334 | 38451202 | 40.868  |
| 17 | 38514401 | 38566791 | 52.39   |
| 17 | 38600735 | 38696481 | 95.746  |
| 17 | 38718724 | 39106824 | 388.1   |
| 17 | 39164002 | 39265071 | 101.069 |
| 17 | 39835837 | 39835851 | 0.014   |
| 17 | 39862221 | 40018288 | 156.067 |
| 17 | 40027708 | 40049260 | 21.552  |
| 17 | 40298988 | 40339768 | 40.78   |
| 17 | 40397387 | 40417489 | 20.102  |

|    |          |          |         |
|----|----------|----------|---------|
| 17 | 40939288 | 41053998 | 114.71  |
| 17 | 41071195 | 41071235 | 0.04    |
| 17 | 41074461 | 41076133 | 1.672   |
| 17 | 41076204 | 41375202 | 298.998 |
| 17 | 41578238 | 41673712 | 95.474  |
| 17 | 41737628 | 41742551 | 4.923   |
| 17 | 41775850 | 41799160 | 23.31   |
| 17 | 42180601 | 42714627 | 534.026 |
| 17 | 42757715 | 42760293 | 2.578   |
| 17 | 42777951 | 42778013 | 0.062   |
| 17 | 42852393 | 42852409 | 0.016   |
| 17 | 42866593 | 42883029 | 16.436  |
| 17 | 42979443 | 43164022 | 184.579 |
| 17 | 43185770 | 43263056 | 77.286  |
| 17 | 43269526 | 43286138 | 16.612  |
| 17 | 43498874 | 43691404 | 192.53  |
| 17 | 43691409 | 43693052 | 1.643   |
| 17 | 43714753 | 43969828 | 255.075 |
| 17 | 44003796 | 44042872 | 39.076  |
| 17 | 44106278 | 44106317 | 0.039   |
| 17 | 44121995 | 44151565 | 29.57   |
| 17 | 44180374 | 44306985 | 126.611 |
| 17 | 44475640 | 44958122 | 482.482 |
| 17 | 44995942 | 45021590 | 25.648  |
| 17 | 45116075 | 45369364 | 253.289 |
| 17 | 45509160 | 45638351 | 129.191 |
| 17 | 45662376 | 45771490 | 109.114 |
| 17 | 45785755 | 46027601 | 241.846 |
| 17 | 46033081 | 46101223 | 68.142  |
| 17 | 46101905 | 46255017 | 153.112 |
| 17 | 46275105 | 46424519 | 149.414 |
| 17 | 46447220 | 46448961 | 1.741   |
| 17 | 46598080 | 46652757 | 54.677  |
| 17 | 46691130 | 46923927 | 232.797 |
| 17 | 46940911 | 46986267 | 45.356  |
| 17 | 46992982 | 47075423 | 82.441  |
| 17 | 47110801 | 47114378 | 3.577   |
| 17 | 47126911 | 47154255 | 27.344  |
| 17 | 47194216 | 47218344 | 24.128  |
| 17 | 47264995 | 47706171 | 441.176 |
| 17 | 47706178 | 47735343 | 29.165  |
| 17 | 47738994 | 47939296 | 200.302 |
| 17 | 47942149 | 48007604 | 65.455  |
| 17 | 48063144 | 48254002 | 190.858 |
| 17 | 48256005 | 48379007 | 123.002 |
| 17 | 48386222 | 48388169 | 1.947   |
| 17 | 48401910 | 48639946 | 238.036 |
| 17 | 48649912 | 48921222 | 271.31  |
| 17 | 48931902 | 49241936 | 310.034 |
| 17 | 49346269 | 49481494 | 135.225 |
| 17 | 49650080 | 49758853 | 108.773 |
| 17 | 50002373 | 50048589 | 46.216  |
| 17 | 50081354 | 50106382 | 25.028  |
| 17 | 50106450 | 50106528 | 0.078   |
| 17 | 50107154 | 50140186 | 33.032  |
| 17 | 50146274 | 50159740 | 13.466  |
| 17 | 50163759 | 50246126 | 82.367  |
| 17 | 50246133 | 50267034 | 20.901  |
| 17 | 50284681 | 50399953 | 115.272 |
| 17 | 50399963 | 50401306 | 1.343   |
| 17 | 50495544 | 50597010 | 101.466 |

|    |          |          |         |
|----|----------|----------|---------|
| 17 | 50856107 | 51199114 | 343.007 |
| 17 | 51270184 | 51312941 | 42.757  |
| 17 | 51968682 | 51994043 | 25.361  |
| 17 | 51994059 | 51994066 | 0.007   |
| 17 | 52016194 | 52025000 | 8.806   |
| 17 | 52171507 | 52171535 | 0.028   |
| 17 | 52179415 | 52179572 | 0.157   |
| 17 | 52179584 | 52179640 | 0.056   |
| 17 | 52184392 | 52570624 | 386.232 |
| 17 | 52635436 | 52640690 | 5.254   |
| 17 | 52661882 | 52665276 | 3.394   |
| 17 | 52665455 | 52750789 | 85.334  |
| 17 | 52804387 | 52891732 | 87.345  |
| 17 | 52920477 | 52920646 | 0.169   |
| 17 | 52946300 | 52997090 | 50.79   |
| 17 | 53027221 | 53064545 | 37.324  |
| 17 | 53119397 | 53294272 | 174.875 |
| 17 | 53360425 | 53363216 | 2.791   |
| 17 | 53364028 | 53423671 | 59.643  |
| 17 | 53453526 | 53635237 | 181.711 |
| 17 | 53693475 | 54274735 | 581.26  |
| 17 | 54293991 | 54439579 | 145.588 |
| 17 | 54462230 | 54681595 | 219.365 |
| 17 | 54681674 | 54953438 | 271.764 |
| 17 | 55004857 | 55005092 | 0.235   |
| 17 | 55005156 | 55021261 | 16.105  |
| 17 | 55111826 | 55143249 | 31.423  |
| 17 | 55152280 | 55152606 | 0.326   |
| 17 | 55153095 | 55168083 | 14.988  |
| 17 | 55168183 | 55168491 | 0.308   |
| 17 | 55189709 | 55235894 | 46.185  |
| 17 | 55236990 | 55303126 | 66.136  |
| 17 | 55615878 | 56323130 | 707.252 |
| 17 | 56348681 | 56603394 | 254.713 |
| 17 | 56603424 | 56671032 | 67.608  |
| 17 | 56671034 | 56671139 | 0.105   |
| 17 | 56671160 | 56708246 | 37.086  |
| 17 | 56741412 | 56742648 | 1.236   |
| 17 | 56757854 | 56769990 | 12.136  |
| 17 | 56831309 | 56831492 | 0.183   |
| 17 | 56838268 | 56853639 | 15.371  |
| 17 | 57025683 | 57041513 | 15.83   |
| 17 | 57060728 | 57066740 | 6.012   |
| 17 | 57129214 | 57129245 | 0.031   |
| 17 | 57192114 | 57269582 | 77.468  |
| 17 | 57305181 | 57335016 | 29.835  |
| 17 | 57366513 | 58190679 | 824.166 |
| 17 | 58190689 | 58250919 | 60.23   |
| 17 | 58493616 | 58854041 | 360.425 |
| 17 | 58900809 | 59168782 | 267.973 |
| 17 | 59206437 | 59232536 | 26.099  |
| 17 | 59235376 | 59249018 | 13.642  |
| 17 | 59369222 | 59613961 | 244.739 |
| 17 | 59627517 | 59715777 | 88.26   |
| 17 | 59723241 | 59735345 | 12.104  |
| 17 | 59737878 | 59803571 | 65.693  |
| 17 | 59874938 | 59926765 | 51.827  |
| 17 | 59934024 | 59975213 | 41.189  |
| 17 | 60015763 | 60015771 | 0.008   |
| 17 | 60040435 | 60046071 | 5.636   |
| 17 | 60055789 | 60080942 | 25.153  |

|    |          |          |         |
|----|----------|----------|---------|
| 17 | 60114402 | 60118182 | 3.78    |
| 17 | 60139086 | 60144222 | 5.136   |
| 17 | 60162655 | 60168245 | 5.59    |
| 17 | 60184475 | 60213048 | 28.573  |
| 17 | 60256548 | 60314488 | 57.94   |
| 17 | 60336556 | 60336711 | 0.155   |
| 17 | 60369251 | 60377026 | 7.775   |
| 17 | 60554211 | 60568184 | 13.973  |
| 17 | 60607735 | 60607818 | 0.083   |
| 17 | 60613471 | 60622030 | 8.559   |
| 17 | 60669528 | 60688369 | 18.841  |
| 17 | 60688520 | 60721899 | 33.379  |
| 17 | 60744743 | 60758694 | 13.951  |
| 17 | 60770226 | 60786427 | 16.201  |
| 17 | 60801553 | 60820186 | 18.633  |
| 17 | 60820221 | 60821034 | 0.813   |
| 17 | 60825303 | 60858103 | 32.8    |
| 17 | 60858122 | 60916855 | 58.733  |
| 17 | 60979538 | 60986482 | 6.944   |
| 17 | 60997426 | 61010033 | 12.607  |
| 17 | 61051564 | 61247029 | 195.465 |
| 17 | 61312095 | 61408201 | 96.106  |
| 17 | 61427484 | 61522276 | 94.792  |
| 17 | 61522280 | 61533309 | 11.029  |
| 17 | 61537459 | 61583412 | 45.953  |
| 17 | 61626076 | 61633524 | 7.448   |
| 17 | 61633545 | 61633748 | 0.203   |
| 17 | 61634170 | 61634252 | 0.082   |
| 17 | 61634846 | 61634901 | 0.055   |
| 17 | 61642052 | 61750438 | 108.386 |
| 17 | 61926035 | 61979277 | 53.242  |
| 17 | 62044573 | 62061280 | 16.707  |
| 17 | 62069191 | 62071988 | 2.797   |
| 17 | 62085265 | 62085455 | 0.19    |
| 17 | 62090613 | 62118724 | 28.111  |
| 17 | 62178561 | 62183490 | 4.929   |
| 17 | 62213316 | 62261812 | 48.496  |
| 17 | 62311361 | 62336715 | 25.354  |
| 17 | 62337131 | 62358254 | 21.123  |
| 17 | 62376959 | 62395318 | 18.359  |
| 17 | 62400602 | 62712935 | 312.333 |
| 17 | 62721050 | 63062660 | 341.61  |
| 17 | 63074281 | 63363353 | 289.072 |
| 17 | 63383141 | 63446050 | 62.909  |
| 17 | 63494276 | 63702149 | 207.873 |
| 17 | 63793590 | 63825366 | 31.776  |
| 17 | 63867461 | 63869969 | 2.508   |
| 17 | 63882217 | 63907775 | 25.558  |
| 17 | 63907784 | 63982255 | 74.471  |
| 17 | 64004858 | 64027365 | 22.507  |
| 17 | 64027715 | 64043421 | 15.706  |
| 17 | 64079104 | 64108634 | 29.53   |
| 17 | 64108641 | 64110771 | 2.13    |
| 17 | 64114875 | 64117391 | 2.516   |
| 17 | 64132265 | 64132340 | 0.075   |
| 17 | 64132372 | 64132432 | 0.06    |
| 17 | 64132530 | 64132566 | 0.036   |
| 17 | 64132606 | 64132636 | 0.03    |
| 17 | 64132840 | 64133026 | 0.186   |
| 17 | 64133326 | 64133344 | 0.018   |
| 17 | 64133779 | 64134022 | 0.243   |

|    |          |          |         |
|----|----------|----------|---------|
| 17 | 64134032 | 64134065 | 0.033   |
| 17 | 64134168 | 64135663 | 1.495   |
| 17 | 64135969 | 64135973 | 0.004   |
| 17 | 64138205 | 64138234 | 0.029   |
| 17 | 64157446 | 64157492 | 0.046   |
| 17 | 64157542 | 64157561 | 0.019   |
| 17 | 64157629 | 64157673 | 0.044   |
| 17 | 64161173 | 64161323 | 0.15    |
| 17 | 64167047 | 64167054 | 0.007   |
| 17 | 64167058 | 64167064 | 0.006   |
| 17 | 64167072 | 64167077 | 0.005   |
| 17 | 64167106 | 64191053 | 23.947  |
| 17 | 64201625 | 64201635 | 0.01    |
| 17 | 64203131 | 64208229 | 5.098   |
| 17 | 64212552 | 64235537 | 22.985  |
| 17 | 64235801 | 64239391 | 3.59    |
| 17 | 64286939 | 64288126 | 1.187   |
| 17 | 64292114 | 64327345 | 35.231  |
| 17 | 64327682 | 64327732 | 0.05    |
| 17 | 64327742 | 64328011 | 0.269   |
| 17 | 64329425 | 64329725 | 0.3     |
| 17 | 64329765 | 64332417 | 2.652   |
| 17 | 64332844 | 64333537 | 0.693   |
| 17 | 64333547 | 64333581 | 0.034   |
| 17 | 64335313 | 64337922 | 2.609   |
| 17 | 64345119 | 64350024 | 4.905   |
| 17 | 64372845 | 64372905 | 0.06    |
| 17 | 64373621 | 64373770 | 0.149   |
| 17 | 64373771 | 64374014 | 0.243   |
| 17 | 64374824 | 64374835 | 0.011   |
| 18 | 4473     | 209884   | 205.411 |
| 18 | 249326   | 368090   | 118.764 |
| 18 | 371774   | 394646   | 22.872  |
| 18 | 423361   | 531201   | 107.84  |
| 18 | 572810   | 599910   | 27.1    |
| 18 | 639173   | 658636   | 19.463  |
| 18 | 669778   | 669798   | 0.02    |
| 18 | 676475   | 842221   | 165.746 |
| 18 | 874454   | 874489   | 0.035   |
| 18 | 900000   | 1023298  | 123.298 |
| 18 | 1168132  | 1175920  | 7.788   |
| 18 | 1214568  | 1245508  | 30.94   |
| 18 | 1318583  | 1367618  | 49.035  |
| 18 | 1369173  | 1733208  | 364.035 |
| 18 | 1745530  | 1820361  | 74.831  |
| 18 | 1845832  | 1864694  | 18.862  |
| 18 | 2048498  | 2048517  | 0.019   |
| 18 | 2072196  | 2089378  | 17.182  |
| 18 | 2089515  | 2293516  | 204.001 |
| 18 | 2293531  | 2305367  | 11.836  |
| 18 | 2333403  | 2567768  | 234.365 |
| 18 | 2567864  | 2674175  | 106.311 |
| 18 | 2850231  | 2898033  | 47.802  |
| 18 | 3008421  | 3021374  | 12.953  |
| 18 | 3035012  | 3085117  | 50.105  |
| 18 | 3231836  | 3287987  | 56.151  |
| 18 | 3294459  | 3341254  | 46.795  |
| 18 | 3341262  | 3774141  | 432.879 |
| 18 | 4001874  | 4689645  | 687.771 |
| 18 | 4699184  | 4734228  | 35.044  |
| 18 | 4748990  | 4796740  | 47.75   |

|    |          |          |          |
|----|----------|----------|----------|
| 18 | 4806052  | 4819485  | 13.433   |
| 18 | 4827505  | 4860559  | 33.054   |
| 18 | 4880946  | 5003814  | 122.868  |
| 18 | 5003839  | 5138456  | 134.617  |
| 18 | 5139161  | 5205857  | 66.696   |
| 18 | 5205916  | 5333823  | 127.907  |
| 18 | 5365341  | 5366468  | 1.127    |
| 18 | 5369437  | 5418604  | 49.167   |
| 18 | 5418662  | 5427871  | 9.209    |
| 18 | 5436929  | 5891069  | 454.14   |
| 18 | 5975506  | 6062487  | 86.981   |
| 18 | 6062496  | 6087516  | 25.02    |
| 18 | 6091260  | 6091275  | 0.015    |
| 18 | 6143556  | 6208424  | 64.868   |
| 18 | 6208431  | 6339470  | 131.039  |
| 18 | 6368601  | 6400656  | 32.055   |
| 18 | 6531382  | 6543120  | 11.738   |
| 18 | 6543122  | 7014609  | 471.487  |
| 18 | 7025851  | 7083341  | 57.49    |
| 18 | 7139883  | 7421740  | 281.857  |
| 18 | 7681964  | 7820724  | 138.76   |
| 18 | 7833508  | 7837613  | 4.105    |
| 18 | 7924828  | 7988000  | 63.172   |
| 18 | 8084300  | 8098702  | 14.402   |
| 18 | 8098771  | 8133006  | 34.235   |
| 18 | 8190527  | 8193862  | 3.335    |
| 18 | 8200449  | 8240726  | 40.277   |
| 18 | 8240754  | 8354186  | 113.432  |
| 18 | 8392274  | 8421880  | 29.606   |
| 18 | 8752695  | 8843155  | 90.46    |
| 18 | 9001620  | 9212833  | 211.213  |
| 18 | 9298033  | 9991603  | 693.57   |
| 18 | 10089191 | 10389191 | 300      |
| 18 | 10574746 | 11621158 | 1046.412 |
| 18 | 11646949 | 11647128 | 0.179    |
| 18 | 11784573 | 11823398 | 38.825   |
| 18 | 11850101 | 11995634 | 145.533  |
| 18 | 12005750 | 12527363 | 521.613  |
| 18 | 12527368 | 13027397 | 500.029  |
| 18 | 13267413 | 14224360 | 956.947  |
| 18 | 14372252 | 14972345 | 600.093  |
| 18 | 15009372 | 15082846 | 73.474   |
| 18 | 15094367 | 15109492 | 15.125   |
| 18 | 15127043 | 15512159 | 385.116  |
| 18 | 15551901 | 15557576 | 5.675    |
| 18 | 15604270 | 16792045 | 1187.775 |
| 18 | 16792061 | 17191120 | 399.059  |
| 18 | 17234766 | 17393554 | 158.788  |
| 18 | 17442948 | 17681591 | 238.643  |
| 18 | 17684010 | 18005151 | 321.141  |
| 18 | 18017185 | 18261038 | 243.853  |
| 18 | 18261068 | 18305955 | 44.887   |
| 18 | 18316300 | 18519502 | 203.202  |
| 18 | 18519681 | 18758733 | 239.052  |
| 18 | 18758734 | 19274109 | 515.375  |
| 18 | 19305079 | 20648174 | 1343.095 |
| 18 | 20654205 | 21133859 | 479.654  |
| 18 | 21138154 | 21310345 | 172.191  |
| 18 | 21326720 | 21713268 | 386.548  |
| 18 | 21786196 | 22004039 | 217.843  |
| 18 | 22154256 | 22272610 | 118.354  |



|    |          |          |          |
|----|----------|----------|----------|
| 18 | 22285203 | 22963621 | 678.418  |
| 18 | 22963646 | 23095104 | 131.458  |
| 18 | 23228548 | 23602319 | 373.771  |
| 18 | 23725074 | 23781862 | 56.788   |
| 18 | 23848222 | 24058892 | 210.67   |
| 18 | 24220152 | 25725788 | 1505.636 |
| 18 | 26010581 | 26536152 | 525.571  |
| 18 | 26655533 | 26917339 | 261.806  |
| 18 | 27454501 | 27459180 | 4.679    |
| 18 | 27545021 | 28653172 | 1108.151 |
| 18 | 28671841 | 30656752 | 1984.911 |
| 18 | 33372987 | 34878846 | 1505.859 |
| 18 | 35148673 | 35431391 | 282.718  |
| 18 | 35494533 | 36194190 | 699.657  |
| 18 | 36321282 | 36348348 | 27.066   |
| 18 | 36360571 | 36626907 | 266.336  |
| 18 | 36667433 | 36679093 | 11.66    |
| 18 | 36765296 | 36827605 | 62.309   |
| 18 | 36892044 | 36892519 | 0.475    |
| 18 | 37205504 | 37228665 | 23.161   |
| 18 | 37342257 | 37488018 | 145.761  |
| 18 | 37582456 | 38119675 | 537.219  |
| 18 | 38138529 | 38853316 | 714.787  |
| 18 | 38884950 | 39509109 | 624.159  |
| 18 | 39585980 | 39679848 | 93.868   |
| 18 | 39797406 | 40358399 | 560.993  |
| 18 | 40358416 | 40420106 | 61.69    |
| 18 | 40423509 | 40423656 | 0.147    |
| 18 | 40429393 | 40430829 | 1.436    |
| 18 | 40441286 | 40444225 | 2.939    |
| 18 | 40446414 | 40455589 | 9.175    |
| 18 | 40467956 | 40512246 | 44.29    |
| 18 | 40518048 | 40558476 | 40.428   |
| 18 | 40571136 | 40583679 | 12.543   |
| 18 | 40592459 | 40608969 | 16.51    |
| 18 | 40618965 | 40630238 | 11.273   |
| 18 | 40664647 | 40672943 | 8.296    |
| 18 | 40681317 | 40692643 | 11.326   |
| 18 | 40702364 | 40723747 | 21.383   |
| 18 | 40809514 | 41195068 | 385.554  |
| 18 | 41217192 | 41235796 | 18.604   |
| 18 | 41297533 | 41533703 | 236.17   |
| 18 | 41645579 | 41681721 | 36.142   |
| 18 | 41718437 | 41721021 | 2.584    |
| 18 | 41837611 | 41911654 | 74.043   |
| 18 | 41958745 | 42230334 | 271.589  |
| 18 | 42271292 | 42314317 | 43.025   |
| 18 | 42344822 | 42402869 | 58.047   |
| 18 | 42443199 | 42519188 | 75.989   |
| 18 | 42523963 | 42531509 | 7.546    |
| 18 | 42841364 | 42967879 | 126.515  |
| 18 | 45051953 | 45214032 | 162.079  |
| 18 | 45363858 | 45570502 | 206.644  |
| 18 | 45770742 | 46017150 | 246.408  |
| 18 | 46131685 | 46227800 | 96.115   |
| 18 | 46362942 | 46650248 | 287.306  |
| 18 | 46687023 | 46701919 | 14.896   |
| 18 | 46776630 | 46955035 | 178.405  |
| 18 | 46955175 | 46964867 | 9.692    |
| 18 | 46964883 | 46970657 | 5.774    |
| 18 | 46994078 | 47052388 | 58.31    |

|    |          |          |          |
|----|----------|----------|----------|
| 18 | 47323638 | 47348868 | 25.23    |
| 18 | 47371651 | 47586201 | 214.55   |
| 18 | 47586206 | 47655130 | 68.924   |
| 18 | 47663492 | 47678881 | 15.389   |
| 18 | 47747838 | 48103022 | 355.184  |
| 18 | 48118048 | 48252872 | 134.824  |
| 18 | 48252873 | 48651238 | 398.365  |
| 18 | 48743304 | 48819788 | 76.484   |
| 18 | 48819953 | 48850276 | 30.323   |
| 18 | 48866242 | 48968020 | 101.778  |
| 18 | 48981444 | 48983063 | 1.619    |
| 18 | 49042830 | 49143312 | 100.482  |
| 18 | 49177169 | 49289130 | 111.961  |
| 18 | 49388024 | 49418327 | 30.303   |
| 18 | 49472692 | 49472725 | 0.033    |
| 18 | 49483494 | 49486608 | 3.114    |
| 18 | 49489658 | 49967057 | 477.399  |
| 18 | 49981678 | 50195610 | 213.932  |
| 18 | 50233488 | 50442913 | 209.425  |
| 18 | 50500038 | 50758286 | 258.248  |
| 18 | 50777456 | 50875137 | 97.681   |
| 18 | 50940043 | 51508636 | 568.593  |
| 18 | 51702886 | 51989062 | 286.176  |
| 18 | 52065022 | 53432480 | 1367.458 |
| 18 | 53451623 | 53950283 | 498.66   |
| 18 | 53950520 | 54177019 | 226.499  |
| 18 | 54183624 | 54249879 | 66.255   |
| X  | 450      | 457      | 0.007    |
| X  | 463      | 479      | 0.016    |
| X  | 505      | 17663    | 17.158   |
| X  | 19679    | 19719    | 0.04     |
| X  | 25163    | 25180    | 0.017    |
| X  | 27215    | 27218    | 0.003    |
| X  | 27253    | 30633    | 3.38     |
| X  | 30658    | 35459    | 4.801    |
| X  | 35501    | 42737    | 7.236    |
| X  | 46049    | 46079    | 0.03     |
| X  | 47311    | 47328    | 0.017    |
| X  | 50187    | 56281    | 6.094    |
| X  | 56283    | 56332    | 0.049    |
| X  | 57869    | 57896    | 0.027    |
| X  | 57908    | 58029    | 0.121    |
| X  | 58040    | 59541    | 1.501    |
| X  | 59740    | 59749    | 0.009    |
| X  | 59750    | 61721    | 1.971    |
| X  | 64000    | 64047    | 0.047    |
| X  | 66965    | 66997    | 0.032    |
| X  | 67080    | 70926    | 3.846    |
| X  | 72544    | 74486    | 1.942    |
| X  | 76260    | 76283    | 0.023    |
| X  | 79436    | 79467    | 0.031    |
| X  | 79480    | 79487    | 0.007    |
| X  | 80882    | 80896    | 0.014    |
| X  | 85393    | 85423    | 0.03     |
| X  | 86388    | 86405    | 0.017    |
| X  | 86435    | 86615    | 0.18     |
| X  | 86625    | 86670    | 0.045    |
| X  | 87158    | 87182    | 0.024    |
| X  | 88254    | 88563    | 0.309    |
| X  | 89360    | 90319    | 0.959    |
| X  | 90743    | 94286    | 3.543    |

|   |        |        |        |
|---|--------|--------|--------|
| X | 94307  | 94913  | 0.606  |
| X | 94942  | 95309  | 0.367  |
| X | 95356  | 95707  | 0.351  |
| X | 95730  | 95836  | 0.106  |
| X | 95924  | 96756  | 0.832  |
| X | 96757  | 97585  | 0.828  |
| X | 97738  | 97803  | 0.065  |
| X | 99405  | 99423  | 0.018  |
| X | 99431  | 99454  | 0.023  |
| X | 99617  | 99628  | 0.011  |
| X | 109989 | 110137 | 0.148  |
| X | 110155 | 112044 | 1.889  |
| X | 113770 | 113831 | 0.061  |
| X | 115026 | 115040 | 0.014  |
| X | 115304 | 116833 | 1.529  |
| X | 117021 | 117178 | 0.157  |
| X | 122355 | 122388 | 0.033  |
| X | 124236 | 124243 | 0.007  |
| X | 128776 | 128841 | 0.065  |
| X | 138575 | 140020 | 1.445  |
| X | 140094 | 141452 | 1.358  |
| X | 142607 | 142609 | 0.002  |
| X | 152169 | 157585 | 5.416  |
| X | 157745 | 158919 | 1.174  |
| X | 159107 | 159156 | 0.049  |
| X | 159721 | 159731 | 0.01   |
| X | 159736 | 166800 | 7.064  |
| X | 166806 | 167171 | 0.365  |
| X | 173268 | 175503 | 2.235  |
| X | 175839 | 176963 | 1.124  |
| X | 185508 | 188974 | 3.466  |
| X | 192235 | 192288 | 0.053  |
| X | 192996 | 193017 | 0.021  |
| X | 197008 | 197061 | 0.053  |
| X | 197063 | 197093 | 0.03   |
| X | 197233 | 197276 | 0.043  |
| X | 197363 | 197474 | 0.111  |
| X | 197567 | 197607 | 0.04   |
| X | 197613 | 197812 | 0.199  |
| X | 198921 | 198928 | 0.007  |
| X | 199409 | 199727 | 0.318  |
| X | 204319 | 206775 | 2.456  |
| X | 209178 | 209825 | 0.647  |
| X | 211803 | 213280 | 1.477  |
| X | 213308 | 214161 | 0.853  |
| X | 214888 | 217538 | 2.65   |
| X | 219716 | 221311 | 1.595  |
| X | 221442 | 221606 | 0.164  |
| X | 224754 | 224778 | 0.024  |
| X | 226784 | 226807 | 0.023  |
| X | 231588 | 231644 | 0.056  |
| X | 232914 | 234602 | 1.688  |
| X | 234632 | 234635 | 0.003  |
| X | 235863 | 235959 | 0.096  |
| X | 238223 | 240256 | 2.033  |
| X | 257690 | 257700 | 0.01   |
| X | 257890 | 260778 | 2.888  |
| X | 260951 | 260980 | 0.029  |
| X | 301833 | 303328 | 1.495  |
| X | 303457 | 309731 | 6.274  |
| X | 322767 | 343753 | 20.986 |

|   |         |         |         |
|---|---------|---------|---------|
| X | 347862  | 355870  | 8.008   |
| X | 386311  | 386329  | 0.018   |
| X | 388798  | 402903  | 14.105  |
| X | 423388  | 428963  | 5.575   |
| X | 428972  | 428988  | 0.016   |
| X | 429132  | 429144  | 0.012   |
| X | 437737  | 437744  | 0.007   |
| X | 439609  | 446241  | 6.632   |
| X | 446336  | 521140  | 74.804  |
| X | 861274  | 861293  | 0.019   |
| X | 1066835 | 1139914 | 73.079  |
| X | 1149550 | 1162631 | 13.081  |
| X | 1244547 | 1285608 | 41.061  |
| X | 1520141 | 1588217 | 68.076  |
| X | 1593802 | 1650007 | 56.205  |
| X | 1803421 | 1885286 | 81.865  |
| X | 2172576 | 2299145 | 126.569 |
| X | 2341207 | 2589566 | 248.359 |
| X | 2592701 | 2657678 | 64.977  |
| X | 2664243 | 2664252 | 0.009   |
| X | 2703837 | 2763307 | 59.47   |
| X | 2784842 | 2806090 | 21.248  |
| X | 2807290 | 2807804 | 0.514   |
| X | 2885711 | 2987255 | 101.544 |
| X | 3065776 | 3066945 | 1.169   |
| X | 3070897 | 3076215 | 5.318   |
| X | 3288951 | 3303404 | 14.453  |
| X | 3312692 | 3320348 | 7.656   |
| X | 3361532 | 3442378 | 80.846  |
| X | 3459010 | 3459684 | 0.674   |
| X | 3489457 | 3517184 | 27.727  |
| X | 3517196 | 3572434 | 55.238  |
| X | 3594483 | 3663003 | 68.52   |
| X | 3678946 | 3678958 | 0.012   |
| X | 3689961 | 3724520 | 34.559  |
| X | 3740549 | 3742381 | 1.832   |
| X | 3745665 | 3783555 | 37.89   |
| X | 3854657 | 3918255 | 63.598  |
| X | 3942242 | 4002932 | 60.69   |
| X | 4081840 | 4116513 | 34.673  |
| X | 4129363 | 4129574 | 0.211   |
| X | 4141299 | 4141454 | 0.155   |
| X | 4166673 | 4196651 | 29.978  |
| X | 4355523 | 4403175 | 47.652  |
| X | 4417608 | 4420301 | 2.693   |
| X | 4425160 | 4431487 | 6.327   |
| X | 4441484 | 4503553 | 62.069  |
| X | 4522242 | 4829814 | 307.572 |
| X | 4950609 | 4972702 | 22.093  |
| X | 4981927 | 5018257 | 36.33   |
| X | 5032591 | 5071277 | 38.686  |
| X | 5076034 | 5159871 | 83.837  |
| X | 5176293 | 5200797 | 24.504  |
| X | 5229329 | 5233927 | 4.598   |
| X | 5253259 | 5389480 | 136.221 |
| X | 5389497 | 5394793 | 5.296   |
| X | 5403995 | 5414089 | 10.094  |
| X | 5423991 | 5424012 | 0.021   |
| X | 5453959 | 5453991 | 0.032   |
| X | 5466938 | 5469814 | 2.876   |
| X | 5503127 | 5524588 | 21.461  |

|   |          |          |          |
|---|----------|----------|----------|
| X | 5561259  | 5563277  | 2.018    |
| X | 5566139  | 5567138  | 0.999    |
| X | 5569574  | 5570587  | 1.013    |
| X | 5570606  | 5573055  | 2.449    |
| X | 5591033  | 5591051  | 0.018    |
| X | 5596025  | 5599835  | 3.81     |
| X | 5599931  | 5641004  | 41.073   |
| X | 5641009  | 5641030  | 0.021    |
| X | 5683020  | 5683157  | 0.137    |
| X | 5683167  | 5777100  | 93.933   |
| X | 5777480  | 5834950  | 57.47    |
| X | 5989179  | 6074479  | 85.3     |
| X | 6137484  | 6187832  | 50.348   |
| X | 6347031  | 6481686  | 134.655  |
| X | 6823807  | 6855178  | 31.371   |
| X | 6869782  | 6943492  | 73.71    |
| X | 6997802  | 7228451  | 230.649  |
| X | 7266420  | 7324631  | 58.211   |
| X | 7359748  | 7413178  | 53.43    |
| X | 7848167  | 7953580  | 105.413  |
| X | 7984709  | 8085963  | 101.254  |
| X | 8171951  | 8451980  | 280.029  |
| X | 8552005  | 9137243  | 585.238  |
| X | 9401368  | 9468513  | 67.145   |
| X | 9501249  | 9555962  | 54.713   |
| X | 9594421  | 11067955 | 1473.534 |
| X | 11268606 | 12058412 | 789.806  |
| X | 12097467 | 12966785 | 869.318  |
| X | 12966801 | 13159338 | 192.537  |
| X | 13634217 | 13671876 | 37.659   |
| X | 13800828 | 14011590 | 210.762  |
| X | 14059388 | 15019994 | 960.606  |
| X | 15065706 | 15086024 | 20.318   |
| X | 15347206 | 16603109 | 1255.903 |
| X | 16974953 | 17219141 | 244.188  |
| X | 17922522 | 19286519 | 1363.997 |
| X | 19310069 | 19315218 | 5.149    |
| X | 19318660 | 19326958 | 8.298    |
| X | 19352491 | 19352516 | 0.025    |
| X | 19663589 | 20466106 | 802.517  |
| X | 23430121 | 25260707 | 1830.586 |
| X | 26895452 | 29004488 | 2109.036 |
| X | 29331137 | 30567789 | 1236.652 |
| X | 30627313 | 30778499 | 151.186  |
| X | 31223183 | 31225889 | 2.706    |
| X | 31225938 | 31225945 | 0.007    |
| X | 31225953 | 31467180 | 241.227  |
| X | 31928472 | 31939217 | 10.745   |
| X | 31980845 | 32165429 | 184.584  |
| X | 32328192 | 32342226 | 14.034   |
| X | 32352644 | 32513832 | 161.188  |
| X | 32513894 | 32733431 | 219.537  |
| X | 32747109 | 32946233 | 199.124  |
| X | 32947183 | 33346388 | 399.205  |
| X | 33346390 | 33347764 | 1.374    |
| X | 33505282 | 33824740 | 319.458  |
| X | 34043042 | 34829696 | 786.654  |
| X | 34834691 | 34847089 | 12.398   |
| X | 35057910 | 35116390 | 58.48    |
| X | 35158169 | 35179565 | 21.396   |
| X | 35231685 | 35274092 | 42.407   |

|   |          |          |          |
|---|----------|----------|----------|
| X | 35310658 | 35316985 | 6.327    |
| X | 35321672 | 35382315 | 60.643   |
| X | 35794751 | 35795324 | 0.573    |
| X | 35795329 | 35795340 | 0.011    |
| X | 35795907 | 35795924 | 0.017    |
| X | 35797234 | 35797411 | 0.177    |
| X | 35797432 | 35797496 | 0.064    |
| X | 35801385 | 35801396 | 0.011    |
| X | 35802863 | 35802872 | 0.009    |
| X | 35805100 | 35805254 | 0.154    |
| X | 35805266 | 35809654 | 4.388    |
| X | 35914098 | 35917754 | 3.656    |
| X | 35920577 | 35920995 | 0.418    |
| X | 35921077 | 35921090 | 0.013    |
| X | 35921109 | 35926008 | 4.899    |
| X | 35932819 | 35932841 | 0.022    |
| X | 35957798 | 36035241 | 77.443   |
| X | 36624438 | 36800241 | 175.803  |
| X | 36812110 | 37013568 | 201.458  |
| X | 37122949 | 38354237 | 1231.288 |
| X | 39961733 | 40309135 | 347.402  |
| X | 40545991 | 41056744 | 510.753  |
| X | 41189373 | 41192020 | 2.647    |
| X | 41192060 | 41897829 | 705.769  |
| X | 41933088 | 41933091 | 0.003    |
| X | 42050372 | 42255073 | 204.701  |
| X | 42585859 | 42628598 | 42.739   |
| X | 43074889 | 44306184 | 1231.295 |
| X | 44306192 | 44314012 | 7.82     |
| X | 44343232 | 44359077 | 15.845   |
| X | 44359095 | 44366389 | 7.294    |
| X | 44380109 | 44852192 | 472.083  |
| X | 44853820 | 45180266 | 326.446  |
| X | 45180364 | 45189651 | 9.287    |
| X | 45203760 | 46847449 | 1643.689 |
| X | 48573074 | 49289034 | 715.96   |
| X | 49481623 | 49593405 | 111.782  |
| X | 53894609 | 55824474 | 1929.865 |
| X | 56092895 | 56121570 | 28.675   |
| X | 56426224 | 56545237 | 119.013  |
| X | 56728690 | 57047866 | 319.176  |
| X | 57214785 | 59106958 | 1892.173 |
| X | 60126520 | 60228387 | 101.867  |
| X | 60310795 | 60939734 | 628.939  |
| X | 60961253 | 62210293 | 1249.04  |
| X | 62445211 | 63015990 | 570.779  |
| X | 63857988 | 65319447 | 1461.459 |
| X | 66154421 | 69800145 | 3645.724 |
| X | 80695279 | 81099878 | 404.599  |
| X | 81156640 | 81156670 | 0.03     |
| X | 81156704 | 81156715 | 0.011    |
| X | 81157349 | 81453933 | 296.584  |
| X | 81460743 | 81460883 | 0.14     |
| X | 81461104 | 84811837 | 3350.733 |
| X | 85124089 | 85651445 | 527.356  |
| X | 86392877 | 86556049 | 163.172  |
| X | 86573346 | 86579049 | 5.703    |
| X | 86579205 | 87486512 | 907.307  |
| X | 87719972 | 87766791 | 46.819   |
| X | 87919292 | 88850418 | 931.126  |
| X | 89144863 | 90130117 | 985.254  |

|   |           |           |          |
|---|-----------|-----------|----------|
| X | 90404600  | 90586773  | 182.173  |
| X | 91692741  | 91692771  | 0.03     |
| X | 91846172  | 92005624  | 159.452  |
| X | 92429418  | 95249694  | 2820.276 |
| X | 95557517  | 96789133  | 1231.616 |
| X | 96904613  | 97045466  | 140.853  |
| X | 97598415  | 99158855  | 1560.44  |
| X | 99446076  | 100934667 | 1488.591 |
| X | 103156050 | 103268666 | 112.616  |
| X | 103766650 | 103817610 | 50.96    |
| X | 104285694 | 104386807 | 101.113  |
| X | 104564018 | 105907474 | 1343.456 |
| X | 106110903 | 107324254 | 1213.351 |
| X | 107483622 | 108278918 | 795.296  |
| X | 108278920 | 108852077 | 573.157  |
| X | 108907593 | 109038210 | 130.617  |
| X | 109055502 | 109219942 | 164.44   |
| X | 109405541 | 110458376 | 1052.835 |
| X | 110973747 | 111752420 | 778.673  |
| X | 111940032 | 112772053 | 832.021  |
| X | 114604958 | 115940997 | 1336.039 |
| X | 116122970 | 116808728 | 685.758  |
| X | 117912478 | 118375623 | 463.145  |
| X | 118406362 | 118818549 | 412.187  |
| X | 119128041 | 119503762 | 375.721  |
| X | 119628347 | 119942786 | 314.439  |
| X | 119961178 | 119961205 | 0.027    |
| X | 119961682 | 119969648 | 7.966    |
| X | 119969788 | 119995400 | 25.612   |
| X | 120019111 | 120049470 | 30.359   |
| X | 120065192 | 120166201 | 101.009  |
| X | 120170628 | 120202754 | 32.126   |
| X | 120212618 | 120275326 | 62.708   |
| X | 120278025 | 120343068 | 65.043   |
| X | 120353490 | 120372543 | 19.053   |
| X | 120548296 | 120586357 | 38.061   |
| X | 120586373 | 120631675 | 45.302   |
| X | 120631685 | 120636564 | 4.879    |
| X | 120657444 | 120667608 | 10.164   |
| X | 120704060 | 120718821 | 14.761   |
| X | 120762339 | 120805204 | 42.865   |
| X | 120809069 | 121325851 | 516.782  |
| X | 121441954 | 122041220 | 599.266  |
| X | 122041424 | 122064697 | 23.273   |
| X | 122110903 | 122110911 | 0.008    |
| X | 122122573 | 122140846 | 18.273   |
| X | 122187285 | 122234909 | 47.624   |
| X | 122235893 | 122235934 | 0.041    |
| X | 122257439 | 122262036 | 4.597    |
| X | 122262963 | 122262977 | 0.014    |
| X | 122263187 | 122263200 | 0.013    |
| X | 122276469 | 122310175 | 33.706   |
| X | 122360358 | 122384451 | 24.093   |
| X | 122419309 | 122426782 | 7.473    |
| X | 122505393 | 122778475 | 273.082  |
| X | 122778541 | 122784879 | 6.338    |
| X | 122793850 | 122802137 | 8.287    |
| X | 122830744 | 122935641 | 104.897  |
| X | 122960480 | 122960517 | 0.037    |
| X | 122973849 | 122973885 | 0.036    |
| X | 122977013 | 123034127 | 57.114   |

|   |           |           |         |
|---|-----------|-----------|---------|
| X | 123068734 | 123068880 | 0.146   |
| X | 123068902 | 123141993 | 73.091  |
| X | 123584601 | 123671960 | 87.359  |
| X | 123711555 | 123771392 | 59.837  |
| X | 123855649 | 124783448 | 927.799 |
| X | 125432442 | 125432454 | 0.012   |
| X | 125452713 | 125479707 | 26.994  |
| X | 125509154 | 125514980 | 5.826   |
| X | 125523362 | 125526650 | 3.288   |
| X | 125540936 | 125544981 | 4.045   |
| X | 125544989 | 125545000 | 0.011   |
| X | 125545215 | 125545241 | 0.026   |
| X | 125548928 | 125549120 | 0.192   |
| X | 125569018 | 125619461 | 50.443  |
| X | 125619466 | 125619481 | 0.015   |
| X | 125622362 | 125629048 | 6.686   |
| X | 125642834 | 125657727 | 14.893  |
| X | 125691498 | 125724944 | 33.446  |
| X | 125729346 | 125754014 | 24.668  |
| X | 125768669 | 125788716 | 20.047  |
| X | 125788721 | 125796549 | 7.828   |
| X | 125796552 | 125825663 | 29.111  |
| X | 125848322 | 125848336 | 0.014   |
| X | 125848442 | 125848447 | 0.005   |
| X | 125848633 | 125863603 | 14.97   |
| X | 125863697 | 125866455 | 2.758   |
