# Supplementary material for: A genome-wide scan for selection signatures in Yorkshire and Landrace pigs based on sequencing data
Source: PubMed Central journal article supplement — Anim Genet. 2014 Oct 19;45(6):808–16. doi: 10.1111/age.12229 (PMC4276287; doi:10.1111/age.12229), 2014-10-19
Supplement: age0045-0808-sd5.pdf [file age0045-0808-sd5.pdf]

**Table S3** Candidate selected regions positions in Yorkshire, including the chromosome number, start position, end position, length and REHH *P*-value.

| <b>Chromosome</b> | <b>Start Base</b> | <b>End Base</b> | <b>length(kb)</b> | <b>REHH pValue</b> |
|-------------------|-------------------|-----------------|-------------------|--------------------|
| 1                 | 3189865           | 3255692         | 65.827            | 0.00570            |
| 1                 | 22294355          | 22724859        | 430.504           | 0.00080            |
| 1                 | 31385554          | 31471152        | 85.598            | 0.00752            |
| 1                 | 31547347          | 32172312        | 624.965           | 0.00652            |
| 1                 | 56584283          | 57344739        | 760.456           | 0.00600            |
| 1                 | 124360644         | 124400958       | 40.314            | 0.00936            |
| 1                 | 154942125         | 154959877       | 17.752            | 0.00625            |
| 1                 | 170095678         | 170547831       | 452.153           | 0.00268            |
| 1                 | 212907919         | 213445886       | 537.967           | 0.00310            |
| 1                 | 214015014         | 214125210       | 110.196           | 0.00367            |
| 1                 | 275637543         | 275640023       | 2.48              | 0.00144            |
| 1                 | 282898343         | 282978341       | 79.998            | 0.00680            |
| 1                 | 284030924         | 284065414       | 34.49             | 0.00250            |
| 1                 | 284468966         | 284477081       | 8.115             | 0.00853            |
| 1                 | 285919763         | 285925479       | 5.716             | 0.00061            |
| 1                 | 286791148         | 287217643       | 426.495           | 0.00950            |
| 1                 | 293622064         | 293632956       | 10.892            | 0.00526            |
| 2                 | 1001199           | 1010925         | 9.726             | 0.00892            |
| 2                 | 1518678           | 1534446         | 15.768            | 0.00772            |
| 2                 | 1848583           | 1936825         | 88.242            | 0.00567            |
| 2                 | 6331741           | 6343355         | 11.614            | 0.00028            |
| 2                 | 6384433           | 6473104         | 88.671            | 0.00029            |
| 2                 | 8822921           | 8824151         | 1.23              | 0.00091            |
| 2                 | 8840673           | 8843640         | 2.967             | 0.00828            |
| 2                 | 9384164           | 9436226         | 52.062            | 0.00415            |
| 2                 | 9472589           | 9474838         | 2.249             | 0.00034            |
| 2                 | 12259282          | 12275827        | 16.545            | 0.00199            |
| 2                 | 15295165          | 15501388        | 206.223           | 0.00556            |
| 2                 | 15572280          | 15593980        | 21.7              | 0.00118            |
| 2                 | 15615165          | 15659622        | 44.457            | 0.00148            |
| 2                 | 15669874          | 15727407        | 57.533            | 0.00305            |
| 2                 | 15969926          | 15977182        | 7.256             | 0.00583            |
| 2                 | 15986622          | 16069963        | 83.341            | 0.00343            |
| 2                 | 38032845          | 38243461        | 210.616           | 0.00454            |
| 2                 | 47764804          | 48035083        | 270.279           | 0.00663            |
| 2                 | 54035937          | 54324592        | 288.655           | 0.00004            |
| 2                 | 61550467          | 61635873        | 85.406            | 0.00795            |
| 2                 | 71299071          | 71776351        | 477.28            | 0.00839            |
| 2                 | 124116571         | 124145131       | 28.56             | 0.00291            |
| 2                 | 126246974         | 126290621       | 43.647            | 0.00473            |
| 2                 | 131665494         | 131721152       | 55.658            | 0.00737            |
| 3                 | 16832499          | 16837700        | 5.201             | 0.00181            |
| 3                 | 20159377          | 20160126        | 0.749             | 0.00741            |
| 3                 | 24448237          | 24467773        | 19.536            | 0.00354            |
| 3                 | 24977815          | 25554898        | 577.083           | 0.00448            |
| 3                 | 25676994          | 25680631        | 3.637             | 0.00948            |
| 3                 | 41607874          | 41614308        | 6.434             | 0.00858            |
| 3                 | 64113863          | 64730798        | 616.935           | 0.00033            |
| 3                 | 90868682          | 90882293        | 13.611            | 0.00091            |
| 3                 | 91962910          | 92013991        | 51.081            | 0.00967            |
| 3                 | 107769928         | 108798788       | 1028.86           | 0.00296            |
| 3                 | 111875859         | 112129268       | 253.409           | 0.00787            |
| 3                 | 115046533         | 115095808       | 49.275            | 0.00475            |
| 3                 | 115239987         | 115249944       | 9.957             | 0.00550            |
| 3                 | 115249970         | 115276450       | 26.48             | 0.00986            |
| 3                 | 115770965         | 115815507       | 44.542            | 0.00526            |
| 3                 | 116914060         | 116953620       | 39.56             | 0.00005            |

|   |           |           |         |         |
|---|-----------|-----------|---------|---------|
| 3 | 117031389 | 117048679 | 17.29   | 0.00360 |
| 3 | 117247361 | 117265223 | 17.862  | 0.00017 |
| 3 | 119279727 | 119330473 | 50.746  | 0.00432 |
| 4 | 2138351   | 2199511   | 61.16   | 0.00041 |
| 4 | 2206365   | 2216187   | 9.822   | 0.00987 |
| 4 | 5810471   | 5851611   | 41.14   | 0.00456 |
| 4 | 19980891  | 20013647  | 32.756  | 0.00854 |
| 4 | 20973492  | 20983052  | 9.56    | 0.00987 |
| 4 | 47216347  | 47219063  | 2.716   | 0.00564 |
| 4 | 91620643  | 91939683  | 319.04  | 0.00803 |
| 4 | 101718332 | 101799923 | 81.591  | 0.00151 |
| 4 | 101812803 | 102465544 | 652.741 | 0.00252 |
| 4 | 103347177 | 103433024 | 85.847  | 0.00119 |
| 4 | 122625713 | 123218749 | 593.036 | 0.00028 |
| 4 | 123341289 | 123373957 | 32.668  | 0.00263 |
| 4 | 123539775 | 123622691 | 82.916  | 0.00001 |
| 4 | 127057126 | 127067009 | 9.883   | 0.00690 |
| 4 | 133549841 | 133550575 | 0.734   | 0.00244 |
| 4 | 133995565 | 134060886 | 65.321  | 0.00509 |
| 4 | 135999225 | 136007390 | 8.165   | 0.00982 |
| 5 | 4553689   | 4888378   | 334.689 | 0.00266 |
| 5 | 4913282   | 4921777   | 8.495   | 0.00014 |
| 5 | 4927436   | 4930181   | 2.745   | 0.00000 |
| 5 | 7603487   | 7650191   | 46.704  | 0.00012 |
| 5 | 16738904  | 16743822  | 4.918   | 0.00028 |
| 5 | 16979466  | 16990337  | 10.871  | 0.00264 |
| 5 | 19304629  | 19341547  | 36.918  | 0.00025 |
| 6 | 579811    | 603736    | 23.925  | 0.00244 |
| 6 | 1465011   | 1475520   | 10.509  | 0.00017 |
| 6 | 3337216   | 3351860   | 14.644  | 0.00826 |
| 6 | 5098454   | 5132587   | 34.133  | 0.00539 |
| 6 | 9738435   | 9789693   | 51.258  | 0.00738 |
| 6 | 11674174  | 11699949  | 25.775  | 0.00036 |
| 6 | 29386349  | 29423908  | 37.559  | 0.00883 |
| 6 | 29423966  | 29756509  | 332.543 | 0.00107 |
| 6 | 37712730  | 37717184  | 4.454   | 0.00001 |
| 6 | 40987810  | 40988613  | 0.803   | 0.00290 |
| 6 | 42950790  | 42967694  | 16.904  | 0.00130 |
| 6 | 43182392  | 43192488  | 10.096  | 0.00389 |
| 6 | 45306071  | 45388490  | 82.419  | 0.00660 |
| 6 | 45459274  | 45542529  | 83.255  | 0.00529 |
| 6 | 45701664  | 45707272  | 5.608   | 0.00022 |
| 6 | 45751882  | 45752591  | 0.709   | 0.00320 |
| 6 | 45756195  | 45796473  | 40.278  | 0.00350 |
| 6 | 51592138  | 51596210  | 4.072   | 0.00042 |
| 6 | 51604050  | 51629187  | 25.137  | 0.00113 |
| 6 | 51700041  | 51742964  | 42.923  | 0.00482 |
| 6 | 52026923  | 52035675  | 8.752   | 0.00205 |
| 6 | 52570843  | 52653552  | 82.709  | 0.00393 |
| 6 | 57876829  | 57908291  | 31.462  | 0.00191 |
| 6 | 58242352  | 58344858  | 102.506 | 0.00202 |
| 6 | 65704821  | 65792475  | 87.654  | 0.00232 |
| 6 | 70112607  | 70266494  | 153.887 | 0.00729 |
| 6 | 93591872  | 93972164  | 380.292 | 0.00979 |
| 6 | 94905207  | 95108364  | 203.157 | 0.00534 |
| 6 | 110819630 | 110893219 | 73.589  | 0.00010 |
| 6 | 110973264 | 111083881 | 110.617 | 0.00004 |
| 6 | 111807819 | 111840541 | 32.722  | 0.00120 |
| 6 | 112211087 | 112414200 | 203.113 | 0.00048 |
| 6 | 119344591 | 119425433 | 80.842  | 0.00822 |
| 6 | 120108969 | 120240387 | 131.418 | 0.00026 |

|    |           |           |          |         |
|----|-----------|-----------|----------|---------|
| 7  | 4229754   | 4256554   | 26.8     | 0.00585 |
| 7  | 5192794   | 5311834   | 119.04   | 0.00691 |
| 7  | 7267361   | 7280438   | 13.077   | 0.00155 |
| 7  | 12710183  | 12720650  | 10.467   | 0.00425 |
| 7  | 24450876  | 24462521  | 11.645   | 0.00209 |
| 7  | 24539249  | 24554853  | 15.604   | 0.00007 |
| 7  | 33782130  | 33844596  | 62.466   | 0.00433 |
| 7  | 41341804  | 41408349  | 66.545   | 0.00904 |
| 7  | 42171806  | 42246973  | 75.167   | 0.00388 |
| 7  | 42292278  | 42300371  | 8.093    | 0.00016 |
| 7  | 42312810  | 42500766  | 187.956  | 0.00348 |
| 7  | 53841084  | 53960460  | 119.376  | 0.00213 |
| 7  | 71348188  | 71382343  | 34.155   | 0.00484 |
| 7  | 86952797  | 89156139  | 2203.342 | 0.00473 |
| 7  | 109120963 | 109146912 | 25.949   | 0.00002 |
| 7  | 120751589 | 120760316 | 8.727    | 0.00127 |
| 7  | 123570354 | 123630400 | 60.046   | 0.00656 |
| 7  | 123635349 | 123645604 | 10.255   | 0.00118 |
| 7  | 126088836 | 126173972 | 85.136   | 0.00023 |
| 7  | 133129185 | 133138260 | 9.075    | 0.00572 |
| 7  | 134752500 | 134766898 | 14.398   | 0.00002 |
| 8  | 3524869   | 3551803   | 26.934   | 0.00812 |
| 8  | 13918360  | 14249620  | 331.26   | 0.00929 |
| 9  | 1875875   | 1937570   | 61.695   | 0.00572 |
| 9  | 2064305   | 2554472   | 490.167  | 0.00704 |
| 9  | 6876946   | 6878735   | 1.789    | 0.00659 |
| 9  | 6948966   | 7172496   | 223.53   | 0.00431 |
| 9  | 9816125   | 9823717   | 7.592    | 0.00096 |
| 9  | 10571882  | 10573398  | 1.516    | 0.00057 |
| 9  | 11365373  | 11449345  | 83.972   | 0.00572 |
| 9  | 12369447  | 12463039  | 93.592   | 0.00234 |
| 9  | 13223263  | 13229957  | 6.694    | 0.00742 |
| 9  | 13239211  | 13242394  | 3.183    | 0.00023 |
| 9  | 13252778  | 13351778  | 99       | 0.00539 |
| 9  | 16415937  | 16957771  | 541.834  | 0.00466 |
| 9  | 25517527  | 25668201  | 150.674  | 0.00120 |
| 9  | 27834045  | 27849084  | 15.039   | 0.00283 |
| 9  | 47066387  | 47075028  | 8.641    | 0.00415 |
| 9  | 47075037  | 47121374  | 46.337   | 0.00305 |
| 9  | 47168086  | 47169862  | 1.776    | 0.00745 |
| 9  | 48653721  | 48703285  | 49.564   | 0.00070 |
| 9  | 61954609  | 62313591  | 358.982  | 0.00116 |
| 9  | 62313602  | 62547091  | 233.489  | 0.00000 |
| 9  | 62884570  | 62927790  | 43.22    | 0.00491 |
| 9  | 114341928 | 114545773 | 203.845  | 0.00434 |
| 9  | 114622621 | 114661868 | 39.247   | 0.00304 |
| 9  | 115080117 | 115151754 | 71.637   | 0.00327 |
| 9  | 121779156 | 121840874 | 61.718   | 0.00804 |
| 9  | 126013113 | 126056902 | 43.789   | 0.00008 |
| 9  | 129046072 | 129082028 | 35.956   | 0.00553 |
| 10 | 10224693  | 10251448  | 26.755   | 0.00968 |
| 10 | 17343586  | 17499855  | 156.269  | 0.00337 |
| 10 | 17557122  | 18008824  | 451.702  | 0.00161 |
| 10 | 27535680  | 27551401  | 15.721   | 0.00018 |
| 10 | 44167037  | 44184536  | 17.499   | 0.00276 |
| 10 | 44187308  | 44400992  | 213.684  | 0.00562 |
| 10 | 60361735  | 60421119  | 59.384   | 0.00645 |
| 11 | 5895223   | 5906821   | 11.598   | 0.00444 |
| 11 | 64162723  | 64589019  | 426.296  | 0.00643 |
| 11 | 65802450  | 65812120  | 9.67     | 0.00490 |
| 11 | 74770026  | 74833102  | 63.076   | 0.00499 |

|    |           |           |          |         |
|----|-----------|-----------|----------|---------|
| 11 | 77170358  | 77175544  | 5.186    | 0.00306 |
| 11 | 77284447  | 77299461  | 15.014   | 0.00515 |
| 11 | 77520432  | 77555029  | 34.597   | 0.00900 |
| 11 | 78640393  | 78686435  | 46.042   | 0.00912 |
| 12 | 1969136   | 1994959   | 25.823   | 0.00015 |
| 12 | 4988141   | 4999869   | 11.728   | 0.00244 |
| 12 | 6572008   | 6666985   | 94.977   | 0.00560 |
| 12 | 6757999   | 6855354   | 97.355   | 0.00950 |
| 12 | 18684436  | 18735043  | 50.607   | 0.00214 |
| 12 | 23354337  | 23452197  | 97.86    | 0.00050 |
| 12 | 25733017  | 25882930  | 149.913  | 0.00573 |
| 12 | 49135309  | 49144800  | 9.491    | 0.00175 |
| 12 | 49167226  | 49208831  | 41.605   | 0.00003 |
| 12 | 56008391  | 56143161  | 134.77   | 0.00624 |
| 12 | 56184047  | 56243791  | 59.744   | 0.00095 |
| 13 | 1867028   | 2262220   | 395.192  | 0.00009 |
| 13 | 2293160   | 2336151   | 42.991   | 0.00556 |
| 13 | 26171654  | 26185134  | 13.48    | 0.00172 |
| 13 | 29085280  | 29125568  | 40.288   | 0.00545 |
| 13 | 55092452  | 55155469  | 63.017   | 0.00266 |
| 13 | 65089920  | 65110290  | 20.37    | 0.00916 |
| 13 | 71490435  | 72314502  | 824.067  | 0.00191 |
| 13 | 114710331 | 116592826 | 1882.495 | 0.00723 |
| 13 | 138480523 | 138544550 | 64.027   | 0.00352 |
| 14 | 1649731   | 1667863   | 18.132   | 0.00893 |
| 14 | 2759910   | 2776743   | 16.833   | 0.00469 |
| 14 | 5793584   | 5806550   | 12.966   | 0.00052 |
| 14 | 12915568  | 13187066  | 271.498  | 0.00509 |
| 14 | 25740698  | 25782941  | 42.243   | 0.00691 |
| 14 | 38679243  | 38923500  | 244.257  | 0.00506 |
| 14 | 41523975  | 41541693  | 17.718   | 0.00120 |
| 14 | 49906323  | 49955979  | 49.656   | 0.00705 |
| 14 | 93068894  | 93167791  | 98.897   | 0.00150 |
| 14 | 93173591  | 93204472  | 30.881   | 0.00146 |
| 14 | 93229628  | 93276272  | 46.644   | 0.00015 |
| 14 | 113780802 | 113801761 | 20.959   | 0.00719 |
| 14 | 113983681 | 113988010 | 4.329    | 0.00016 |
| 14 | 133742974 | 133753385 | 10.411   | 0.00781 |
| 14 | 138447568 | 138467070 | 19.502   | 0.00015 |
| 14 | 138710221 | 138718925 | 8.704    | 0.00101 |
| 14 | 140645464 | 140733195 | 87.731   | 0.00646 |
| 14 | 144871104 | 144905463 | 34.359   | 0.00167 |
| 14 | 146465942 | 146514707 | 48.765   | 0.00475 |
| 15 | 29449648  | 29474431  | 24.783   | 0.00710 |
| 15 | 29491948  | 29840469  | 348.521  | 0.00364 |
| 15 | 117840129 | 117843877 | 3.748    | 0.00248 |
| 15 | 122408220 | 122459401 | 51.181   | 0.00092 |
| 15 | 128814327 | 128910360 | 96.033   | 0.00041 |
| 15 | 131799062 | 131809806 | 10.744   | 0.00848 |
| 15 | 132375384 | 132379143 | 3.759    | 0.00310 |
| 15 | 132395234 | 132397392 | 2.158    | 0.00005 |
| 15 | 132429250 | 132432852 | 3.602    | 0.00292 |
| 15 | 132673826 | 132676358 | 2.532    | 0.00587 |
| 16 | 3133480   | 3137443   | 3.963    | 0.00000 |
| 16 | 15990574  | 16023339  | 32.765   | 0.00949 |
| 16 | 22105156  | 22766508  | 661.352  | 0.00679 |
| 16 | 48640644  | 48807335  | 166.691  | 0.00301 |
| 16 | 72938627  | 72939832  | 1.205    | 0.00001 |
| 16 | 76550105  | 76552552  | 2.447    | 0.00252 |
| 17 | 18060226  | 18808225  | 747.999  | 0.00157 |
| 17 | 34901568  | 35059721  | 158.153  | 0.00972 |

|    |          |          |         |         |
|----|----------|----------|---------|---------|
| 17 | 35987184 | 36030142 | 42.958  | 0.00917 |
| 17 | 44042872 | 44064378 | 21.506  | 0.00056 |
| 17 | 53285220 | 53294286 | 9.066   | 0.00203 |
| 17 | 54293991 | 54315885 | 21.894  | 0.00467 |
| 17 | 55232487 | 55235899 | 3.412   | 0.00272 |
| 17 | 64338154 | 64339140 | 0.986   | 0.00351 |
| 18 | 4827505  | 4903448  | 75.943  | 0.00743 |
| 18 | 46278607 | 46402492 | 123.885 | 0.00008 |
| 18 | 51754149 | 51989062 | 234.913 | 0.00503 |
| X  | 5032591  | 5076042  | 43.451  | 0.00623 |
| X  | 5076059  | 5253259  | 177.2   | 0.00460 |
