# Supplementary material for: A genome-wide scan for selection signatures in Yorkshire and Landrace pigs based on sequencing data
Source: PubMed Central journal article supplement — Anim Genet. 2014 Oct 19;45(6):808–16. doi: 10.1111/age.12229 (PMC4276287; doi:10.1111/age.12229), 2014-10-19
Supplement: age0045-0808-sd6.pdf [file age0045-0808-sd6.pdf]

**Table S4** Candidate selected regions positions in Landrace, including the chromosome number, start position, end position, length and REHH *P*-value.

| <b>Chromosome</b> | <b>Start Base</b> | <b>End Base</b> | <b>length (kb)</b> | <b>REHH pValue</b> |
|-------------------|-------------------|-----------------|--------------------|--------------------|
| 1                 | 2720060           | 2728112         | 8.052              | 0.00604            |
| 1                 | 8670943           | 8797806         | 126.863            | 0.00884            |
| 1                 | 75711416          | 75961438        | 250.022            | 0.00818            |
| 1                 | 76646987          | 76712605        | 65.618             | 0.00757            |
| 1                 | 248060962         | 248841642       | 780.68             | 0.00243            |
| 1                 | 265063188         | 265212930       | 149.742            | 0.00815            |
| 1                 | 267912471         | 267930764       | 18.293             | 0.00467            |
| 1                 | 274529270         | 274846709       | 317.439            | 0.00134            |
| 1                 | 274860906         | 274870329       | 9.423              | 0.00430            |
| 1                 | 275263941         | 275281020       | 17.079             | 0.00167            |
| 1                 | 276248398         | 276328312       | 79.914             | 0.00698            |
| 2                 | 104165            | 105312          | 1.147              | 0.00431            |
| 2                 | 6227731           | 6239068         | 11.337             | 0.00431            |
| 2                 | 12080271          | 12082661        | 2.39               | 0.00962            |
| 2                 | 15569156          | 15593980        | 24.824             | 0.00501            |
| 2                 | 16111708          | 16299440        | 187.732            | 0.00815            |
| 2                 | 44253226          | 44276611        | 23.385             | 0.00006            |
| 2                 | 46548685          | 46559490        | 10.805             | 0.00205            |
| 2                 | 46575696          | 46581686        | 5.99               | 0.00725            |
| 2                 | 51157690          | 51213386        | 55.696             | 0.00189            |
| 2                 | 54285052          | 54324554        | 39.502             | 0.00664            |
| 2                 | 62355986          | 62756249        | 400.263            | 0.00489            |
| 2                 | 72143419          | 72172550        | 29.131             | 0.00087            |
| 2                 | 75012826          | 75048543        | 35.717             | 0.00690            |
| 2                 | 85467258          | 86506548        | 1039.29            | 0.00473            |
| 2                 | 86621096          | 86623463        | 2.367              | 0.00027            |
| 2                 | 86657275          | 86658459        | 1.184              | 0.00323            |
| 2                 | 109223958         | 109232522       | 8.564              | 0.00688            |
| 2                 | 123531854         | 123608317       | 76.463             | 0.00753            |
| 2                 | 129492900         | 129873043       | 380.143            | 0.00338            |
| 2                 | 130390065         | 130426150       | 36.085             | 0.00191            |
| 2                 | 135192655         | 135235679       | 43.024             | 0.00589            |
| 2                 | 135288846         | 135323368       | 34.522             | 0.00010            |
| 2                 | 135902965         | 135911446       | 8.481              | 0.00100            |
| 2                 | 136445885         | 136465378       | 19.493             | 0.00761            |
| 3                 | 3730382           | 3773007         | 42.625             | 0.00652            |
| 3                 | 25786799          | 25831014        | 44.215             | 0.00002            |
| 3                 | 33994291          | 34061167        | 66.876             | 0.00824            |
| 3                 | 35067225          | 35069297        | 2.072              | 0.00003            |
| 3                 | 41784715          | 41806056        | 21.341             | 0.00207            |
| 3                 | 52871142          | 52980194        | 109.052            | 0.00731            |
| 3                 | 79696229          | 80033688        | 337.459            | 0.00011            |
| 3                 | 86868919          | 86881075        | 12.156             | 0.00080            |
| 3                 | 86928554          | 87072038        | 143.484            | 0.00101            |
| 3                 | 91117841          | 91119697        | 1.856              | 0.00852            |
| 3                 | 101367517         | 101376295       | 8.778              | 0.00535            |
| 3                 | 109643456         | 109662549       | 19.093             | 0.00946            |
| 3                 | 112331124         | 112346704       | 15.58              | 0.00369            |
| 3                 | 112565426         | 112652605       | 87.179             | 0.00983            |
| 4                 | 5966149           | 6015713         | 49.564             | 0.00527            |
| 4                 | 7217046           | 7228169         | 11.123             | 0.00389            |
| 4                 | 8895943           | 8958647         | 62.704             | 0.00717            |
| 4                 | 11728312          | 11737136        | 8.824              | 0.00682            |
| 4                 | 13664088          | 13673251        | 9.163              | 0.00002            |
| 4                 | 13925975          | 13947083        | 21.108             | 0.00337            |
| 4                 | 65585470          | 65734465        | 148.995            | 0.00062            |
| 4                 | 89190127          | 89371382        | 181.255            | 0.00556            |

|   |           |           |         |         |
|---|-----------|-----------|---------|---------|
| 4 | 116903762 | 116967317 | 63.555  | 0.00164 |
| 4 | 127279012 | 127296970 | 17.958  | 0.00948 |
| 4 | 127919489 | 128058401 | 138.912 | 0.00818 |
| 4 | 134673726 | 134679974 | 6.248   | 0.00007 |
| 5 | 6988526   | 7058468   | 69.942  | 0.00162 |
| 5 | 16760689  | 16784470  | 23.781  | 0.00166 |
| 5 | 16899588  | 16908707  | 9.119   | 0.00857 |
| 5 | 16917037  | 16939465  | 22.428  | 0.00283 |
| 5 | 17248525  | 17487183  | 238.658 | 0.00070 |
| 5 | 23288996  | 24074802  | 785.806 | 0.00001 |
| 5 | 59227995  | 59233749  | 5.754   | 0.00751 |
| 5 | 65010845  | 65012625  | 1.78    | 0.00775 |
| 5 | 65748708  | 65853266  | 104.558 | 0.00070 |
| 5 | 66396846  | 66725591  | 328.745 | 0.00612 |
| 5 | 85123381  | 85141164  | 17.783  | 0.00000 |
| 5 | 98963928  | 98979519  | 15.591  | 0.00499 |
| 6 | 20157114  | 2018244   | 2.53    | 0.00515 |
| 6 | 2437782   | 2451454   | 13.672  | 0.00008 |
| 6 | 5313442   | 5321062   | 7.62    | 0.00735 |
| 6 | 6042725   | 6044032   | 1.307   | 0.00945 |
| 6 | 11428439  | 11433360  | 4.921   | 0.00038 |
| 6 | 32430543  | 32462606  | 32.063  | 0.00579 |
| 6 | 43183409  | 43195431  | 12.022  | 0.00779 |
| 6 | 43719388  | 43757067  | 37.679  | 0.00163 |
| 6 | 45132311  | 45240779  | 108.468 | 0.00030 |
| 6 | 48786281  | 48827942  | 41.661  | 0.00662 |
| 6 | 52126614  | 52130546  | 3.932   | 0.00160 |
| 6 | 52916066  | 52952794  | 36.728  | 0.00289 |
| 6 | 53996236  | 54004991  | 8.755   | 0.00286 |
| 6 | 55206642  | 55249128  | 42.486  | 0.00355 |
| 6 | 59590391  | 59594033  | 3.642   | 0.00589 |
| 6 | 60451665  | 60477157  | 25.492  | 0.00841 |
| 6 | 111796324 | 111865994 | 69.67   | 0.00046 |
| 6 | 119198939 | 119344591 | 145.652 | 0.00585 |
| 7 | 2583283   | 2633689   | 50.406  | 0.00335 |
| 7 | 31328420  | 31403571  | 75.151  | 0.00562 |
| 7 | 37868926  | 37882108  | 13.182  | 0.00696 |
| 7 | 42113358  | 42121912  | 8.554   | 0.00579 |
| 7 | 44664442  | 44815886  | 151.444 | 0.00323 |
| 7 | 45312195  | 45574460  | 262.265 | 0.00544 |
| 7 | 45574557  | 45670173  | 95.616  | 0.00024 |
| 7 | 45821420  | 45825154  | 3.734   | 0.00059 |
| 7 | 81079591  | 81157484  | 77.893  | 0.00842 |
| 7 | 100703442 | 100775415 | 71.973  | 0.00649 |
| 7 | 100799156 | 100900149 | 100.993 | 0.00656 |
| 7 | 129847682 | 129862340 | 14.658  | 0.00493 |
| 7 | 129871710 | 129891398 | 19.688  | 0.00298 |
| 7 | 130911235 | 131011722 | 100.487 | 0.00579 |
| 7 | 131291714 | 131388688 | 96.974  | 0.00705 |
| 7 | 135838328 | 135850039 | 11.711  | 0.00839 |
| 8 | 7917175   | 8222923   | 305.748 | 0.00327 |
| 8 | 13918360  | 14178521  | 260.161 | 0.00427 |
| 8 | 16005362  | 16014044  | 8.682   | 0.00902 |
| 8 | 34998191  | 35275833  | 277.642 | 0.00878 |
| 8 | 35464232  | 35499722  | 35.49   | 0.00856 |
| 8 | 36296387  | 36418619  | 122.232 | 0.00151 |
| 8 | 66333476  | 66348788  | 15.312  | 0.00172 |
| 9 | 1412630   | 1435353   | 22.723  | 0.00016 |
| 9 | 1456480   | 1479023   | 22.543  | 0.00272 |
| 9 | 2223331   | 2577505   | 354.174 | 0.00792 |
| 9 | 3900084   | 3919118   | 19.034  | 0.00881 |

|    |           |           |          |         |
|----|-----------|-----------|----------|---------|
| 9  | 3927497   | 3978728   | 51.231   | 0.00414 |
| 9  | 8728245   | 8921325   | 193.08   | 0.00861 |
| 9  | 9330894   | 9333120   | 2.226    | 0.00703 |
| 9  | 10316574  | 10336296  | 19.722   | 0.00380 |
| 9  | 11120076  | 11136889  | 16.813   | 0.00003 |
| 9  | 11137477  | 11149371  | 11.894   | 0.00034 |
| 9  | 11449284  | 11760977  | 311.693  | 0.00004 |
| 9  | 13033369  | 13036691  | 3.322    | 0.00264 |
| 9  | 13934282  | 14030509  | 96.227   | 0.00672 |
| 9  | 38376215  | 38417087  | 40.872   | 0.00673 |
| 9  | 40189621  | 40286365  | 96.744   | 0.00113 |
| 9  | 40793693  | 41170478  | 376.785  | 0.00525 |
| 9  | 43134418  | 43291918  | 157.5    | 0.00272 |
| 9  | 43577282  | 43702846  | 125.564  | 0.00004 |
| 9  | 45583765  | 45606973  | 23.208   | 0.00157 |
| 9  | 45617360  | 45648133  | 30.773   | 0.00115 |
| 9  | 48061236  | 48071123  | 9.887    | 0.00789 |
| 9  | 55553309  | 55559987  | 6.678    | 0.00469 |
| 9  | 56869539  | 57122277  | 252.738  | 0.00933 |
| 9  | 57230656  | 57379772  | 149.116  | 0.00300 |
| 9  | 57807771  | 58024106  | 216.335  | 0.00735 |
| 9  | 59429720  | 59470027  | 40.307   | 0.00037 |
| 9  | 59470597  | 59474437  | 3.84     | 0.00017 |
| 9  | 59871600  | 59874325  | 2.725    | 0.00053 |
| 9  | 85617778  | 86247590  | 629.812  | 0.00708 |
| 9  | 102847568 | 103896296 | 1048.728 | 0.00467 |
| 9  | 126923373 | 126948462 | 25.089   | 0.00745 |
| 10 | 10919229  | 10969568  | 50.339   | 0.00167 |
| 10 | 17343586  | 17375779  | 32.193   | 0.00300 |
| 10 | 24355832  | 24357955  | 2.123    | 0.00202 |
| 10 | 25139986  | 25249094  | 109.108  | 0.00272 |
| 10 | 26197521  | 26710943  | 513.422  | 0.00788 |
| 10 | 27194949  | 27253008  | 58.059   | 0.00185 |
| 10 | 41355314  | 41358400  | 3.086    | 0.00284 |
| 10 | 41416648  | 41623759  | 207.111  | 0.00521 |
| 10 | 45403837  | 45436342  | 32.505   | 0.00746 |
| 10 | 55016209  | 55104851  | 88.642   | 0.00746 |
| 10 | 61373240  | 61387469  | 14.229   | 0.00646 |
| 10 | 61665798  | 61681545  | 15.747   | 0.00443 |
| 10 | 63669866  | 63725092  | 55.226   | 0.00003 |
| 10 | 66308964  | 66315334  | 6.37     | 0.00733 |
| 11 | 8036209   | 8258372   | 222.163  | 0.00595 |
| 11 | 10272737  | 10377647  | 104.91   | 0.00062 |
| 11 | 10400737  | 11376721  | 975.984  | 0.00814 |
| 11 | 24361922  | 24445568  | 83.646   | 0.00777 |
| 11 | 44265228  | 44387879  | 122.651  | 0.00406 |
| 11 | 69720446  | 69788999  | 68.553   | 0.00386 |
| 11 | 71519780  | 71559246  | 39.466   | 0.00000 |
| 11 | 74414983  | 74471954  | 56.971   | 0.00225 |
| 11 | 77046562  | 77104667  | 58.105   | 0.00470 |
| 11 | 77297111  | 77299461  | 2.35     | 0.00000 |
| 11 | 77352551  | 77382743  | 30.192   | 0.00898 |
| 11 | 78318648  | 78678168  | 359.52   | 0.00421 |
| 11 | 78804463  | 78882793  | 78.33    | 0.00487 |
| 11 | 79439266  | 79588381  | 149.115  | 0.00382 |
| 12 | 6771152   | 6805468   | 34.316   | 0.00082 |
| 12 | 15890650  | 15938045  | 47.395   | 0.00012 |
| 12 | 16299226  | 16307618  | 8.392    | 0.00087 |
| 12 | 16814413  | 16832213  | 17.8     | 0.00467 |
| 12 | 16937097  | 17191735  | 254.638  | 0.00281 |
| 12 | 17359797  | 17470960  | 111.163  | 0.00869 |

|    |           |           |          |         |
|----|-----------|-----------|----------|---------|
| 12 | 17488444  | 17511411  | 22.967   | 0.00167 |
| 12 | 38945255  | 39011735  | 66.48    | 0.00228 |
| 12 | 41106478  | 41115838  | 9.36     | 0.00780 |
| 12 | 41158920  | 41165901  | 6.981    | 0.00851 |
| 12 | 42468535  | 42621081  | 152.546  | 0.00034 |
| 12 | 45218070  | 45343179  | 125.109  | 0.00398 |
| 12 | 50535159  | 50581774  | 46.615   | 0.00317 |
| 12 | 51579885  | 51586595  | 6.71     | 0.00989 |
| 12 | 51993650  | 51998150  | 4.5      | 0.00058 |
| 12 | 52401285  | 52444137  | 42.852   | 0.00750 |
| 12 | 57202186  | 57204631  | 2.445    | 0.00856 |
| 13 | 24266733  | 24267312  | 0.579    | 0.00365 |
| 13 | 24267318  | 24273627  | 6.309    | 0.00002 |
| 13 | 24283882  | 24294144  | 10.262   | 0.00037 |
| 13 | 41196871  | 42465605  | 1268.734 | 0.00821 |
| 13 | 46171060  | 46191223  | 20.163   | 0.00110 |
| 13 | 47235537  | 47466793  | 231.256  | 0.00310 |
| 13 | 56393014  | 56420697  | 27.683   | 0.00740 |
| 13 | 62159094  | 62189019  | 29.925   | 0.00076 |
| 13 | 78533208  | 78547992  | 14.784   | 0.00903 |
| 13 | 102674387 | 102823552 | 149.165  | 0.00630 |
| 13 | 141631795 | 141637416 | 5.621    | 0.00971 |
| 13 | 143037013 | 143152637 | 115.624  | 0.00705 |
| 14 | 6045300   | 6046145   | 0.845    | 0.00562 |
| 14 | 6074298   | 6076923   | 2.625    | 0.00289 |
| 14 | 6330280   | 6330820   | 0.54     | 0.00807 |
| 14 | 20498147  | 20518712  | 20.565   | 0.00153 |
| 14 | 20770534  | 20776020  | 5.486    | 0.00155 |
| 14 | 23894875  | 23902055  | 7.18     | 0.00929 |
| 14 | 24592939  | 24779049  | 186.11   | 0.00000 |
| 14 | 38956174  | 39000549  | 44.375   | 0.00287 |
| 14 | 50647172  | 50719083  | 71.911   | 0.00538 |
| 14 | 61679112  | 61684431  | 5.319    | 0.00005 |
| 14 | 62158666  | 62344147  | 185.481  | 0.00038 |
| 14 | 63905487  | 63947009  | 41.522   | 0.00020 |
| 14 | 84565309  | 84599981  | 34.672   | 0.00707 |
| 14 | 110280822 | 110542445 | 261.623  | 0.00358 |
| 14 | 115800516 | 115818716 | 18.2     | 0.00845 |
| 14 | 129434463 | 129463787 | 29.324   | 0.00523 |
| 14 | 133172029 | 133187479 | 15.45    | 0.00512 |
| 14 | 135158343 | 135201597 | 43.254   | 0.00277 |
| 14 | 137989307 | 137990497 | 1.19     | 0.00629 |
| 14 | 139739928 | 139768721 | 28.793   | 0.00056 |
| 14 | 141941845 | 141943935 | 2.09     | 0.00710 |
| 14 | 145133173 | 145162356 | 29.183   | 0.00500 |
| 14 | 147303864 | 147308017 | 4.153    | 0.00221 |
| 14 | 147971865 | 147980823 | 8.958    | 0.00775 |
| 15 | 9799888   | 10688672  | 888.784  | 0.00411 |
| 15 | 23661269  | 23829703  | 168.434  | 0.00347 |
| 15 | 28337682  | 28371962  | 34.28    | 0.00847 |
| 15 | 47125962  | 47707720  | 581.758  | 0.00684 |
| 15 | 55142754  | 55608192  | 465.438  | 0.00793 |
| 15 | 119209916 | 119688158 | 478.242  | 0.00135 |
| 15 | 119754640 | 119863636 | 108.996  | 0.00146 |
| 15 | 125565716 | 125568233 | 2.517    | 0.00169 |
| 15 | 125854620 | 125883334 | 28.714   | 0.00750 |
| 15 | 127568285 | 127613802 | 45.517   | 0.00950 |
| 15 | 128458380 | 128474244 | 15.864   | 0.00362 |
| 15 | 128498493 | 128627886 | 129.393  | 0.00349 |
| 15 | 128814327 | 128815902 | 1.575    | 0.00174 |
| 15 | 129682039 | 129697195 | 15.156   | 0.00211 |

|    |           |           |         |         |
|----|-----------|-----------|---------|---------|
| 15 | 129890630 | 129907063 | 16.433  | 0.00453 |
| 15 | 129932411 | 129963240 | 30.829  | 0.00405 |
| 15 | 132399449 | 132409627 | 10.178  | 0.00173 |
| 15 | 132413574 | 132429250 | 15.676  | 0.00002 |
| 15 | 132481584 | 132492360 | 10.776  | 0.00074 |
| 15 | 132515789 | 132517056 | 1.267   | 0.00024 |
| 15 | 132607839 | 132608624 | 0.785   | 0.00126 |
| 16 | 3201921   | 3210226   | 8.305   | 0.00219 |
| 16 | 45551749  | 45603080  | 51.331  | 0.00341 |
| 16 | 46472193  | 46771773  | 299.58  | 0.00519 |
| 16 | 72641192  | 72664136  | 22.944  | 0.00552 |
| 16 | 72938627  | 72939832  | 1.205   | 0.00025 |
| 17 | 31901134  | 32015790  | 114.656 | 0.00173 |
| 17 | 32108872  | 32109971  | 1.099   | 0.00064 |
| 17 | 34206246  | 34400408  | 194.162 | 0.00022 |
| 17 | 34421087  | 34505222  | 84.135  | 0.00030 |
| 17 | 34901568  | 34908632  | 7.064   | 0.00414 |
| 17 | 39862221  | 40018288  | 156.067 | 0.00098 |
| 17 | 46275105  | 46424519  | 149.414 | 0.00026 |
| 17 | 50146274  | 50159740  | 13.466  | 0.00566 |
| 18 | 4806052   | 4819485   | 13.433  | 0.00872 |
| X  | 3065776   | 3066945   | 1.169   | 0.00246 |
| X  | 4081840   | 4116513   | 34.673  | 0.00295 |
| X  | 4166673   | 4196651   | 29.978  | 0.00047 |
| X  | 4417608   | 4420301   | 2.693   | 0.00011 |
| X  | 4425160   | 4431487   | 6.327   | 0.00001 |
| X  | 32947183  | 33346388  | 399.205 | 0.00994 |
| X  | 120212618 | 120275326 | 62.708  | 0.00529 |
| X  | 122257439 | 122262036 | 4.597   | 0.00277 |
