# Supplementary material for: A genome-wide scan for selection signatures in Yorkshire and Landrace pigs based on sequencing data
Source: PubMed Central journal article supplement — Anim Genet. 2014 Oct 19;45(6):808–16. doi: 10.1111/age.12229 (PMC4276287; doi:10.1111/age.12229), 2014-10-19
Supplement: age0045-0808-sd7.pdf [file age0045-0808-sd7.pdf]

**Table S5** Traits and the position of the overlapping pig QTL for the core regions with lowest *p*-values (top five), including traits information, the position of the core regions and QTL, and the QTL IDs in the pig QTL database.

| Population | Chr       | Core Region (bp) |                                 | QTL region (bp) |           | Traits           | QTL ( ID )                                                     |
|------------|-----------|------------------|---------------------------------|-----------------|-----------|------------------|----------------------------------------------------------------|
|            |           | Start            | End                             | Start           | End       |                  |                                                                |
| Yorkshire  | 4         | 1.24E+08         | 1.24E+08                        | 120509810       | 140345606 | Health_QTL       | Calcium level QTL (6378)                                       |
|            |           |                  |                                 | 102054630       | 134902449 | Health_QTL       | Hemolytic complement activity (alternative pathway) QTL (9595) |
|            |           |                  |                                 | 102054630       | 134902449 | Health_QTL       | Hemolytic complement activity (classical pathway) QTL (9602)   |
|            |           |                  |                                 | 102054630       | 134902449 | Health_QTL       | Hemolytic complement activity (classical pathway) QTL (9603)   |
|            |           |                  |                                 | 102054630       | 134902449 | Health_QTL       | Hemolytic complement activity (classical pathway) QTL (9604)   |
|            |           |                  |                                 | 102054630       | 134902449 | Health_QTL       | Hemolytic complement activity (classical pathway) QTL (9605)   |
|            |           |                  |                                 | 102054630       | 134902449 | Health_QTL       | Hemolytic complement activity (classical pathway) QTL (9606)   |
|            |           |                  |                                 | 102054630       | 134902449 | Health_QTL       | Hemolytic complement activity (classical pathway) QTL (9607)   |
|            |           |                  |                                 | 102054630       | 134902449 | Health_QTL       | C3c concentration QTL (9617)                                   |
|            |           |                  |                                 | 120475724       | 136035307 | Health_QTL       | Mean corpuscular hemoglobin concentration QTL (15048)          |
|            |           |                  |                                 | 117208620       | 138213377 | Health_QTL       | Triglyceride level QTL (15068)                                 |
|            |           |                  |                                 | 106510877       | 134902449 | Meat_Quality_QTL | Loin muscle area QTL (51)                                      |
|            |           |                  |                                 | 71310074        | 134902449 | Meat_Quality_QTL | Average backfat thickness QTL (162)                            |
|            |           |                  |                                 | 98720794        | 129939327 | Meat_Quality_QTL | Meat color-a QTL (294)                                         |
|            |           |                  |                                 | 120509810       | 134902449 | Meat_Quality_QTL | Meat color-L QTL (297)                                         |
|            |           |                  |                                 | 119299797       | 135006664 | Meat_Quality_QTL | Hematin pigmentation QTL (301)                                 |
|            |           |                  |                                 | 102054630       | 135006664 | Meat_Quality_QTL | Carcass length QTL (460)                                       |
|            |           |                  |                                 | 123094983       | 135006664 | Meat_Quality_QTL | Intramuscular fat content QTL (778)                            |
|            |           |                  |                                 | 120727617       | 134902449 | Meat_Quality_QTL | Shoulder meat weight QTL (815)                                 |
|            |           |                  |                                 | 120509810       | 134902449 | Meat_Quality_QTL | Shoulder meat weight QTL (953)                                 |
|            |           |                  |                                 | 120509810       | 134902449 | Meat_Quality_QTL | Dressing percentage QTL (954)                                  |
|            |           |                  |                                 | 120509810       | 134902449 | Meat_Quality_QTL | Ham weight QTL (956)                                           |
|            |           |                  |                                 | 120509810       | 134902449 | Meat_Quality_QTL | Ham weight QTL (957)                                           |
|            |           |                  |                                 | 120509810       | 134902449 | Meat_Quality_QTL | Heart weight QTL (959)                                         |
|            |           |                  |                                 | 120509810       | 134902449 | Meat_Quality_QTL | Liver weight QTL (960)                                         |
|            |           |                  |                                 | 0               | 134902449 | Meat_Quality_QTL | Backfat (average) thickness - ultrasound QTL (3759)            |
|            |           |                  |                                 | 106510877       | 140345606 | Meat_Quality_QTL | Carcass weight (cold) QTL (3804)                               |
|            |           |                  |                                 | 123094983       | 135006664 | Meat_Quality_QTL | Intramuscular fat content QTL (3841)                           |
|            |           |                  |                                 | 123094983       | 135006664 | Meat_Quality_QTL | Intramuscular fat content QTL (3842)                           |
|            |           |                  |                                 | 52626380        | 140345606 | Meat_Quality_QTL | Intramuscular fat content QTL (3871)                           |
|            |           |                  |                                 | 71310074        | 140345606 | Meat_Quality_QTL | Shear force at first peak QTL (3933)                           |
|            |           |                  |                                 | 71310074        | 140345606 | Meat_Quality_QTL | Total shear work QTL (3934)                                    |
|            |           |                  |                                 | 123094983       | 134902449 | Meat_Quality_QTL | androstenone, laboratory QTL (4206)                            |
| 106946491  | 128694950 | Meat_Quality_QTL | Japanese color scale QTL (4288) |                 |           |                  |                                                                |

|   |         |         |           |           |                  |                                                     |
|---|---------|---------|-----------|-----------|------------------|-----------------------------------------------------|
|   |         |         | 123094983 | 134902449 | Meat_Quality_QTL | Japanese color scale QTL (4321)                     |
|   |         |         | 123094983 | 134902449 | Meat_Quality_QTL | CIE-L* QTL (4322)                                   |
|   |         |         | 123094983 | 134902449 | Meat_Quality_QTL | pH 24 hr post-mortem (loin) QTL (4323)              |
|   |         |         | 123094983 | 134902449 | Meat_Quality_QTL | Knuckle ham weight QTL (4324)                       |
|   |         |         | 116228488 | 129675081 | Meat_Quality_QTL | pH 24 hr post mortem (ham) QTL (4897)               |
|   |         |         | 12510089  | 134140124 | Meat_Quality_QTL | backfat at mid-back QTL (5243)                      |
|   |         |         | 102054630 | 134902449 | Meat_Quality_QTL | Dressing percentage QTL (5975)                      |
|   |         |         | 102054630 | 134902449 | Meat_Quality_QTL | Drip loss QTL (6003)                                |
|   |         |         | 123094983 | 125474284 | Meat_Quality_QTL | Percentage type IIb fibers QTL (7022)               |
|   |         |         | 123094983 | 125474284 | Meat_Quality_QTL | Percentage type I fibers QTL (7025)                 |
|   |         |         | 106075263 | 131790687 | Meat_Quality_QTL | Palmitic acid percentage QTL (15876)                |
|   |         |         | 106510877 | 125474284 | Production_QTL   | Average daily gain (on test) QTL (49)               |
|   |         |         | 12510089  | 137124342 | Production_QTL   | average daily gain (birth-70 kg) QTL (245)          |
|   |         |         | 14860884  | 128368239 | Production_QTL   | Small intestine length QTL (253)                    |
|   |         |         | 120509810 | 134902449 | Production_QTL   | Body weight (3 weeks) QTL (977)                     |
|   |         |         | 0         | 134902449 | Production_QTL   | Average daily gain (on test) QTL (3757)             |
|   |         |         | 0         | 134902449 | Production_QTL   | average daily gain (birth-end of test) QTL (3758)   |
|   |         |         | 0         | 134902449 | Production_QTL   | Average Daily Gain (EBV) QTL (3771)                 |
|   |         |         | 16391489  | 128632485 | Production_QTL   | Body weight (end of test) QTL (5235)                |
|   |         |         | 102054630 | 140345606 | Reproduction_QTL | Nonfunctional nipples QTL (7473)                    |
| 5 | 4927436 | 4930181 | 4668251   | 71054179  | Exterior_QTL     | Ear erectness QTL (5647)                            |
|   |         |         | 0         | 7985523   | Exterior_QTL     | Time spent lying QTL (5900)                         |
|   |         |         | 0         | 7985523   | Exterior_QTL     | Activity during lying QTL (5903)                    |
|   |         |         | 1839796   | 6647815   | Exterior_QTL     | Front feet conformation QTL (8931)                  |
|   |         |         | 0         | 7985523   | Health_QTL       | Creatinine level QTL (6372)                         |
|   |         |         | 0         | 7985523   | Health_QTL       | Platelet count QTL (7493)                           |
|   |         |         | 3722572   | 35377762  | Meat_Quality_QTL | Backfat at last lumbar QTL (31)                     |
|   |         |         | 4170852   | 33789566  | Meat_Quality_QTL | Backfat thickness between 3rd and 4th rib QTL (412) |
|   |         |         | 0         | 6647815   | Meat_Quality_QTL | Backfat at tenth rib QTL (981)                      |
|   |         |         | 0         | 68590401  | Meat_Quality_QTL | Carcass temperature (24 hr post-mortem) QTL (3307)  |
|   |         |         | 0         | 35377762  | Meat_Quality_QTL | Drip loss QTL (3805)                                |
|   |         |         | 0         | 97859093  | Meat_Quality_QTL | backfat above muscle dorsi QTL (5203)               |
|   |         |         | 584612    | 77414253  | Meat_Quality_QTL | backfat at mid-back QTL (5209)                      |
|   |         |         | 0         | 105302891 | Meat_Quality_QTL | backfat at mid-back QTL (5210)                      |
|   |         |         | 0         | 105302891 | Meat_Quality_QTL | Shoulder subcutaneous fat thickness QTL (5219)      |
|   |         |         | 0         | 92485836  | Meat_Quality_QTL | backfat above muscle dorsi QTL (5238)               |
|   |         |         | 3722572   | 7985523   | Meat_Quality_QTL | Drip loss QTL (5697)                                |
|   |         |         | 0         | 6647815   | Meat_Quality_QTL | CIE-L* QTL (17792)                                  |
|   |         |         | 0         | 6647815   | Production_QTL   | Feed intake QTL (979)                               |
|   |         |         | 0         | 6647815   | Reproduction_QTL | Teat number QTL (2927)                              |

|   |          |          |          |           |                    |                                                          |
|---|----------|----------|----------|-----------|--------------------|----------------------------------------------------------|
| 6 | 37712730 | 37717184 | 34464154 | 129740986 | Exterior_QTL       | Time spent feeding QTL (5911)                            |
|   |          |          | 29979924 | 64855775  | Exterior_QTL       | Ear weight QTL (8863)                                    |
|   |          |          | 11262697 | 94941078  | Exterior_QTL       | Hind leg conformation QTL (17640)                        |
|   |          |          | 6487944  | 116943448 | Exterior_QTL       | Osteochondrosis score QTL (17641)                        |
|   |          |          | 4588136  | 129740986 | Health_Association | Salmonella count in spleen QTL (11562)                   |
|   |          |          | 34746178 | 53509801  | Health_QTL         | Small intestinal Escherichia coli F18 receptor QTL (441) |
|   |          |          | 34464154 | 129740986 | Health_QTL         | Alkaline phosphatase activity QTL (6347)                 |
|   |          |          | 34464154 | 129740986 | Health_QTL         | Calcium level QTL (6376)                                 |
|   |          |          | 34464154 | 129740986 | Health_QTL         | Platelet count QTL (7499)                                |
|   |          |          | 34464154 | 129740986 | Health_QTL         | Platelet count QTL (7500)                                |
|   |          |          | 13801673 | 146251115 | Health_QTL         | Alkaline phosphatase activity QTL (15097)                |
|   |          |          | 35868354 | 44290269  | Health_QTL         | Interleukin-10 level QTL (17604)                         |
|   |          |          | 119691   | 145311036 | Meat_Quality_QTL   | Intramuscular fat content QTL (145)                      |
|   |          |          | 32048098 | 147379210 | Meat_Quality_QTL   | Average backfat thickness QTL (148)                      |
|   |          |          | 32048098 | 147379210 | Meat_Quality_QTL   | Average backfat thickness QTL (149)                      |
|   |          |          | 32048098 | 147379210 | Meat_Quality_QTL   | Intramuscular fat content QTL (150)                      |
|   |          |          | 32048098 | 147379210 | Meat_Quality_QTL   | Intramuscular fat content QTL (151)                      |
|   |          |          | 29979924 | 90560868  | Meat_Quality_QTL   | Lean meat percentage QTL (165)                           |
|   |          |          | 29979924 | 52757738  | Meat_Quality_QTL   | backfat (13 weeks of age) QTL (205)                      |
|   |          |          | 29979924 | 52757738  | Meat_Quality_QTL   | backfat (17 weeks of age) QTL (206)                      |
|   |          |          | 19536155 | 73309236  | Meat_Quality_QTL   | Drip loss QTL (218)                                      |
|   |          |          | 35492322 | 125182864 | Meat_Quality_QTL   | Average backfat thickness QTL (680)                      |
|   |          |          | 36432401 | 85000079  | Meat_Quality_QTL   | backfat at last rib QTL (682)                            |
|   |          |          | 29979924 | 117131464 | Meat_Quality_QTL   | Smell intensity QTL (688)                                |
|   |          |          | 29979924 | 79653393  | Meat_Quality_QTL   | Lean meat percentage QTL (689)                           |
|   |          |          | 29979924 | 117131464 | Meat_Quality_QTL   | tenderness score QTL (691)                               |
|   |          |          | 37262531 | 85846150  | Meat_Quality_QTL   | pH for Longissimus Dorsi QTL (782)                       |
|   |          |          | 37262531 | 85846150  | Meat_Quality_QTL   | Water holding capacity QTL (787)                         |
|   |          |          | 35686257 | 69698783  | Meat_Quality_QTL   | Backfat weight QTL (801)                                 |
|   |          |          | 35686257 | 69698783  | Meat_Quality_QTL   | Lean cuts percentage QTL (817)                           |
|   |          |          | 35686257 | 69698783  | Meat_Quality_QTL   | Ham weight QTL (819)                                     |
|   |          |          | 29979924 | 45448178  | Meat_Quality_QTL   | Fat-cuts percentage QTL (997)                            |
|   |          |          | 29979924 | 45448178  | Meat_Quality_QTL   | backfat at last rib QTL (1000)                           |
|   |          |          | 29979924 | 131245112 | Meat_Quality_QTL   | Dressing percentage QTL (1001)                           |
|   |          |          | 29979924 | 131245112 | Meat_Quality_QTL   | External fat on ham QTL (1002)                           |
|   |          |          | 29979924 | 131245112 | Meat_Quality_QTL   | Average backfat thickness QTL (1004)                     |
|   |          |          | 29979924 | 131245112 | Meat_Quality_QTL   | Backfat weight QTL (1005)                                |
|   |          |          | 29979924 | 131245112 | Meat_Quality_QTL   | Abdominal fat weight QTL (1007)                          |
|   |          |          | 29979924 | 131245112 | Meat_Quality_QTL   | Shoulder external fat weight QTL (1009)                  |
|   |          |          | 29979924 | 131245112 | Meat_Quality_QTL   | Dressing percentage QTL (1010)                           |

|          |           |                  |                                                     |
|----------|-----------|------------------|-----------------------------------------------------|
| 29979924 | 131245112 | Meat_Quality_QTL | Backfat at tenth rib QTL (1011)                     |
| 29979924 | 116295116 | Meat_Quality_QTL | Conductivity 24 hours post-mortem QTL (1013)        |
| 29979924 | 131245112 | Meat_Quality_QTL | Shoulder meat weight QTL (1025)                     |
| 29979924 | 131245112 | Meat_Quality_QTL | Carcass weight (cold) QTL (1028)                    |
| 29979924 | 131245112 | Meat_Quality_QTL | Liver weight QTL (1038)                             |
| 29979924 | 131245112 | Meat_Quality_QTL | Loin and neck meat weight QTL (1039)                |
| 29979924 | 45448178  | Meat_Quality_QTL | Backfat (average) thickness - ultrasound QTL (1043) |
| 29979924 | 131245112 | Meat_Quality_QTL | Creatine-phospho-kinase test QTL (1045)             |
| 35686257 | 89620789  | Meat_Quality_QTL | Conductivity 24 hours post-mortem QTL (1245)        |
| 35686257 | 89620789  | Meat_Quality_QTL | Conductivity 24 hours post-mortem QTL (1247)        |
| 35686257 | 135005428 | Meat_Quality_QTL | Fat-cuts percentage QTL (1257)                      |
| 29979924 | 66533116  | Meat_Quality_QTL | Loin weight QTL (2858)                              |
| 29979924 | 66533116  | Meat_Quality_QTL | Loin and ham percentage in carcass QTL (2872)       |
| 0        | 91526589  | Meat_Quality_QTL | Meat color-a QTL (3236)                             |
| 29979924 | 66533116  | Meat_Quality_QTL | Meat color score QTL (3237)                         |
| 29979924 | 66533116  | Meat_Quality_QTL | Shear force QTL (3238)                              |
| 8744133  | 145613823 | Meat_Quality_QTL | muscle protein percentage QTL (3247)                |
| 29509884 | 147211957 | Meat_Quality_QTL | Loin muscle area QTL (3249)                         |
| 29791908 | 152166379 | Meat_Quality_QTL | Carcass temperature (24 hr post-mortem) QTL (3308)  |
| 8912500  | 152166379 | Meat_Quality_QTL | Empty body lipid content QTL (3317)                 |
| 8520162  | 132185191 | Meat_Quality_QTL | Fat weight (total) QTL (3647)                       |
| 8912500  | 147848040 | Meat_Quality_QTL | Backfat linear at last rib QTL (3650)               |
| 37262531 | 85846150  | Meat_Quality_QTL | pH for Longissimus Dorsi QTL (3845)                 |
| 37262531 | 85846150  | Meat_Quality_QTL | Water holding capacity QTL (3850)                   |
| 17750005 | 137247120 | Meat_Quality_QTL | Carcass length QTL (3873)                           |
| 2352681  | 129740986 | Meat_Quality_QTL | CIE-a* QTL (3921)                                   |
| 2352681  | 129740986 | Meat_Quality_QTL | CIE-a* QTL (3922)                                   |
| 2352681  | 129740986 | Meat_Quality_QTL | CIE-a* QTL (3923)                                   |
| 2352681  | 129740986 | Meat_Quality_QTL | CIE-a* QTL (3924)                                   |
| 35216217 | 142323546 | Meat_Quality_QTL | Backfat between 3rd and 4th last ribs QTL (4167)    |
| 36902441 | 144673744 | Meat_Quality_QTL | Intramuscular fat content QTL (4169)                |
| 32048098 | 44290269  | Meat_Quality_QTL | subjective pork flavor in lean QTL (4220)           |
| 32048098 | 44290269  | Meat_Quality_QTL | subjective pork flavor in lean QTL (4222)           |
| 29979924 | 44290269  | Meat_Quality_QTL | backfat at last rib QTL (4966)                      |
| 27501933 | 44696115  | Meat_Quality_QTL | Drip loss QTL (5547)                                |
| 24117648 | 44696115  | Meat_Quality_QTL | 45 min-3 hr pH decline QTL (5548)                   |
| 37074515 | 44572293  | Meat_Quality_QTL | Average backfat thickness QTL (5775)                |
| 37074515 | 44572293  | Meat_Quality_QTL | pH for Longissimus Dorsi QTL (12673)                |
| 37074515 | 44572293  | Meat_Quality_QTL | pH for Semimembranosus QTL (12674)                  |
| 36980507 | 44478285  | Meat_Quality_QTL | CIE-L* QTL (12676)                                  |

|   |          |          |          |           |                  |                                              |
|---|----------|----------|----------|-----------|------------------|----------------------------------------------|
|   |          |          | 29979924 | 117329203 | Meat_Quality_QTL | Carcass weight (hot) QTL (16866)             |
|   |          |          | 29979924 | 45448178  | Meat_Quality_QTL | backfat at last rib QTL (16876)              |
|   |          |          | 36714425 | 139199314 | Production_QTL   | body weight (13 weeks) QTL (183)             |
|   |          |          | 36714425 | 148036056 | Production_QTL   | body weight (17 weeks) QTL (184)             |
|   |          |          | 36714425 | 132937255 | Production_QTL   | average daily gain (birth-3 weeks) QTL (185) |
|   |          |          | 24493680 | 134065349 | Production_QTL   | average daily gain (10-22 weeks) QTL (186)   |
|   |          |          | 29979924 | 131245112 | Production_QTL   | Body weight (slaughter) QTL (1031)           |
|   |          |          | 29979924 | 131245112 | Production_QTL   | Body weight (slaughter) QTL (1035)           |
|   |          |          | 24215300 | 85846150  | Production_QTL   | average daily gain QTL (3937)                |
|   |          |          | 8238138  | 150798103 | Production_QTL   | Body weight (end of test) QTL (5201)         |
|   |          |          | 19536155 | 44290269  | Production_QTL   | Physis score QTL (8948)                      |
|   |          |          | 29979924 | 66345100  | Production_QTL   | average daily gain QTL (16850)               |
|   |          |          | 19536155 | 157765593 | Reproduction_QTL | Teat number QTL (5226)                       |
|   |          |          | 27783956 | 70820940  | Meat_Quality_QTL | backfat at last rib QTL (17800)              |
| 9 | 62313602 | 62547091 | 48711260 | 65059079  | Exterior_QTL     | Ear size QTL (5644)                          |
|   |          |          | 53311036 | 129113506 | Health_QTL       | CO2 partial pressure QTL (6326)              |
|   |          |          | 23144816 | 153670197 | Health_QTL       | Melanoma susceptibility QTL (7580)           |
|   |          |          | 56664370 | 125416667 | Health_QTL       | Haptoglobin concentration QTL (9646)         |
|   |          |          | 47025178 | 133907605 | Meat_Quality_QTL | Shoulder weight QTL (392)                    |
|   |          |          | 46682251 | 72981639  | Meat_Quality_QTL | Palmitoleic acid percentage QTL (3110)       |
|   |          |          | 46682251 | 72981639  | Meat_Quality_QTL | Stearic acid percentage QTL (3112)           |
|   |          |          | 46682251 | 72981639  | Meat_Quality_QTL | Total saturated fatty acids QTL (3115)       |
|   |          |          | 46682251 | 72981639  | Meat_Quality_QTL | Stearic acid percentage QTL (3120)           |
|   |          |          | 45282513 | 63050049  | Meat_Quality_QTL | Muscle moisture percentage QTL (3274)        |
|   |          |          | 0        | 129440376 | Meat_Quality_QTL | Empty body lipid content QTL (3318)          |
|   |          |          | 45282513 | 139744874 | Meat_Quality_QTL | Drip loss QTL (3806)                         |
|   |          |          | 45282513 | 139744874 | Meat_Quality_QTL | Meat color-L QTL (3807)                      |
|   |          |          | 45282513 | 129113506 | Meat_Quality_QTL | Off-Flavor Score QTL (3812)                  |
|   |          |          | 45282513 | 139744874 | Meat_Quality_QTL | Meat color-L QTL (3817)                      |
|   |          |          | 45282513 | 67062987  | Meat_Quality_QTL | Off-Flavor Score QTL (3818)                  |
|   |          |          | 49147087 | 72327898  | Meat_Quality_QTL | Shear force QTL (3888)                       |
|   |          |          | 23144816 | 129985160 | Meat_Quality_QTL | pH 40 minutes post mortem (ham) QTL (4000)   |
|   |          |          | 23144816 | 65059079  | Meat_Quality_QTL | androstenone, laboratory QTL (4210)          |
|   |          |          | 57427068 | 120738204 | Meat_Quality_QTL | Neck weight QTL (5143)                       |
|   |          |          | 57427068 | 125054548 | Meat_Quality_QTL | External fat on ham QTL (5150)               |
|   |          |          | 45282513 | 109605017 | Meat_Quality_QTL | Shoulder weight QTL (5168)                   |
|   |          |          | 45282513 | 109605017 | Meat_Quality_QTL | Loin muscle area QTL (5178)                  |
|   |          |          | 45282513 | 109605017 | Meat_Quality_QTL | Shoulder weight QTL (5179)                   |
|   |          |          | 45282513 | 109605017 | Meat_Quality_QTL | External fat on loin QTL (5189)              |
|   |          |          | 45282513 | 109605017 | Meat_Quality_QTL | External fat on ham QTL (5190)               |



|    |         |         |          |           |                  |                                                               |
|----|---------|---------|----------|-----------|------------------|---------------------------------------------------------------|
|    |         |         | 45282513 | 109605017 | Meat_Quality_QTL | Side fat thickness QTL (5192)                                 |
|    |         |         | 88508    | 147307767 | Meat_Quality_QTL | backfat above muscle dorsi QTL (5205)                         |
|    |         |         | 88508    | 123346488 | Meat_Quality_QTL | backfat at mid-back QTL (5213)                                |
|    |         |         | 88508    | 141488183 | Meat_Quality_QTL | backfat at mid-back QTL (5246)                                |
|    |         |         | 56664370 | 125416667 | Meat_Quality_QTL | Loin muscle area QTL (5710)                                   |
|    |         |         | 48711260 | 65120228  | Production_QTL   | Feed intake QTL (1101)                                        |
|    |         |         | 45282513 | 109605017 | Production_QTL   | average daily gain QTL (5196)                                 |
|    |         |         | 47461005 | 65120228  | Production_QTL   | average daily gain QTL (16854)                                |
|    |         |         | 45173556 | 138764263 | Reproduction_QTL | Corpus luteum number QTL (517)                                |
| 16 | 3133480 | 3137443 | 1167827  | 20168075  | Exterior_QTL     | Hind leg conformation QTL (8937)                              |
|    |         |         | 1167827  | 67649164  | Health_QTL       | C3c concentration QTL (9633)                                  |
|    |         |         | 1167827  | 67649164  | Health_QTL       | C3c concentration QTL (9634)                                  |
|    |         |         | 1167827  | 82348671  | Health_QTL       | Change in Mycoplasma hyopneumoniae antibody titer QTL (12328) |
|    |         |         | 1167827  | 67649164  | Health_QTL       | Toll-like receptor 9 level QTL (17627)                        |
|    |         |         | 1167827  | 67649164  | Health_QTL       | HDL/LDL ratio QTL (17727)                                     |
|    |         |         | 1167827  | 66781192  | Meat_Quality_QTL | Backfat at tenth rib (19 weeks) QTL (3213)                    |
|    |         |         | 1167827  | 67324243  | Meat_Quality_QTL | Total body fat tissue (22 weeks of age) QTL (3316)            |
|    |         |         | 1167827  | 67649164  | Meat_Quality_QTL | Conductivity 24 hours postmortem (ham) QTL (3926)             |
|    |         |         | 1167827  | 67649164  | Meat_Quality_QTL | Conductivity 24 hours postmortem (ham) QTL (3927)             |
|    |         |         | 1167827  | 67649164  | Meat_Quality_QTL | Conductivity 24 hours postmortem (ham) QTL (3928)             |
|    |         |         | 1167827  | 67649164  | Meat_Quality_QTL | backfat above muscle dorsi QTL (5994)                         |
|    |         |         | 1167827  | 67649164  | Meat_Quality_QTL | Shoulder subcutaneous fat thickness QTL (5995)                |
|    |         |         | 1167827  | 67649164  | Meat_Quality_QTL | Belly meat content QTL (5996)                                 |
|    |         |         | 1167827  | 67649164  | Meat_Quality_QTL | Estimated carcass lean content QTL (5997)                     |
|    |         |         | 1167827  | 67649164  | Meat_Quality_QTL | Fat area QTL (5999)                                           |
|    |         |         | 1167827  | 67649164  | Meat_Quality_QTL | Cooking loss QTL (6014)                                       |
|    |         |         | 1167827  | 67649164  | Meat_Quality_QTL | Shear force QTL (6015)                                        |
|    |         |         | 1167827  | 20982652  | Meat_Quality_QTL | Bacon Depth QTL (12532)                                       |
|    |         |         | 1167827  | 39957561  | Meat_Quality_QTL | Backfat at last lumbar QTL (12533)                            |
|    |         |         | 1167827  | 71940182  | Meat_Quality_QTL | Heart weight QTL (12534)                                      |
|    |         |         | 1167827  | 68644759  | Meat_Quality_QTL | Lung weight QTL (12535)                                       |
|    |         |         | 1167827  | 77499099  | Meat_Quality_QTL | Cooking loss QTL (12536)                                      |
|    |         |         | 1167827  | 42857275  | Meat_Quality_QTL | Meat color-a QTL (12537)                                      |
|    |         |         | 1167827  | 27220285  | Meat_Quality_QTL | Carcass weight (hot) QTL (16874)                              |
|    |         |         | 1167827  | 27220285  | Meat_Quality_QTL | Carcass weight (hot) QTL (16900)                              |
|    |         |         | 1167827  | 80266973  | Production_QTL   | Body weight (birth) QTL (5198)                                |
|    |         |         | 1167827  | 67649164  | Production_QTL   | Feed conversion ratio QTL (5732)                              |
|    |         |         | 1167827  | 67649164  | Production_QTL   | Daily feed intake QTL (5953)                                  |
|    |         |         | 1167827  | 79904939  | Reproduction_QTL | Teat number QTL (5228)                                        |
|    |         |         | 1167827  | 18970761  | Reproduction_QTL | Total number born alive QTL (7537)                            |

|          |   |          |          |          |           |                          |                                                    |          |              |                     |
|----------|---|----------|----------|----------|-----------|--------------------------|----------------------------------------------------|----------|--------------|---------------------|
| Landrace | 5 | 85123381 | 85141164 | 75472363 | 97590125  | Exterior_QTL             | Activity during lying QTL (5901)                   |          |              |                     |
|          |   |          |          | 75472363 | 97590125  | Exterior_QTL             | Time spent drinking QTL (5913)                     |          |              |                     |
|          |   |          |          | 75472363 | 97590125  | Health_QTL               | Sarcocystis miescheriana IgG levels QTL (7495)     |          |              |                     |
|          |   |          |          | 44572091 | 85756451  | Health_QTL               | Haptoglobin concentration QTL (9643)               |          |              |                     |
|          |   |          |          | 71907673 | 85756451  | Health_QTL               | Interferon-gamma level QTL (12264)                 |          |              |                     |
|          |   |          |          | 18392751 | 109965003 | Health_QTL               | Cholesterol level QTL (15069)                      |          |              |                     |
|          |   |          |          | 84846693 | 109965003 | Health_QTL               | Creatinine level QTL (15070)                       |          |              |                     |
|          |   |          |          | 71054179 | 85756451  | Health_QTL               | Interleukin-2 level QTL (17598)                    |          |              |                     |
|          |   |          |          | 63117217 | 85756451  | Meat_Quality_Association | Meat color-L QTL (12087)                           |          |              |                     |
|          |   |          |          | 63117217 | 85756451  | Meat_Quality_Association | Meat color OPTO QTL (12088)                        |          |              |                     |
|          |   |          |          | 63117217 | 85756451  | Meat_Quality_Association | Meat color OPTO QTL (12089)                        |          |              |                     |
|          |   |          |          | 63117217 | 85756451  | Meat_Quality_Association | Japanese color scale QTL (12090)                   |          |              |                     |
|          |   |          |          | 63117217 | 85756451  | Meat_Quality_Association | Loin muscle area QTL (12091)                       |          |              |                     |
|          |   |          |          | 63117217 | 85756451  | Meat_Quality_Association | Loin weight QTL (12092)                            |          |              |                     |
|          |   |          |          | 63117217 | 85756451  | Meat_Quality_Association | Ham weight QTL (12093)                             |          |              |                     |
|          |   |          |          | 83434554 | 106289107 | Meat_Quality_QTL         | Average backfat thickness QTL (54)                 |          |              |                     |
|          |   |          |          | 78579054 | 106289107 | Meat_Quality_QTL         | backfat at last rib QTL (55)                       |          |              |                     |
|          |   |          |          | 83434554 | 97590125  | Meat_Quality_QTL         | Backfat at last lumbar QTL (56)                    |          |              |                     |
|          |   |          |          | 77181014 | 106289107 | Meat_Quality_QTL         | Meat color-L QTL (97)                              |          |              |                     |
|          |   |          |          | 83434554 | 106289107 | Meat_Quality_QTL         | pH 24 hr post-mortem (loin) QTL (98)               |          |              |                     |
|          |   |          |          | 33251630 | 94763337  | Meat_Quality_QTL         | pH 24 hr post-mortem (loin) QTL (101)              |          |              |                     |
|          |   |          |          | 63117217 | 85756451  | Meat_Quality_QTL         | Backfat (average) thickness - ultrasound QTL (351) |          |              |                     |
|          |   |          |          | 71412803 | 92844460  | Meat_Quality_QTL         | Ham weight QTL (382)                               |          |              |                     |
|          |   |          |          | 63834465 | 92844460  | Meat_Quality_QTL         | Loin and ham percentage in carcass QTL (383)       |          |              |                     |
|          |   |          |          | 64731025 | 92844460  | Meat_Quality_QTL         | Belly weight QTL (413)                             |          |              |                     |
|          |   |          |          | 71907673 | 85756451  | Meat_Quality_QTL         | Carcass length QTL (982)                           |          |              |                     |
|          |   |          |          | 75472363 | 91051340  | Meat_Quality_QTL         | Loin weight QTL (3059)                             |          |              |                     |
|          |   |          |          | 75472363 | 91051340  | Meat_Quality_QTL         | Loin meat weight QTL (3061)                        |          |              |                     |
|          |   |          |          | 75472363 | 91051340  | Meat_Quality_QTL         | Empty body protein content QTL (3645)              |          |              |                     |
|          |   |          |          | 68590401 | 86316071  | Meat_Quality_QTL         | Shear force QTL (3872)                             |          |              |                     |
|          |   |          |          | 63117217 | 85756451  | Meat_Quality_QTL         | subjective abnormal odor QTL (4208)                |          |              |                     |
|          |   |          |          | 0        | 97859093  | Meat_Quality_QTL         | backfat above muscle dorsi QTL (5203)              |          |              |                     |
|          |   |          |          | 0        | 105302891 | Meat_Quality_QTL         | backfat at mid-back QTL (5210)                     |          |              |                     |
|          |   |          |          | 0        | 105302891 | Meat_Quality_QTL         | Shoulder subcutaneous fat thickness QTL (5219)     |          |              |                     |
|          |   |          |          | 0        | 92485836  | Meat_Quality_QTL         | backfat above muscle dorsi QTL (5238)              |          |              |                     |
|          |   |          |          | 10592679 | 88540972  | Meat_Quality_QTL         | backfat at mid-back QTL (5244)                     |          |              |                     |
|          |   |          |          | 71054179 | 85756451  | Meat_Quality_QTL         | Loin muscle area QTL (5976)                        |          |              |                     |
|          |   |          |          | 63117217 | 85756451  | Production_QTL           | Average daily gain (entire life) QTL (342)         |          |              |                     |
|          |   |          |          | 71907673 | 102254587 | Production_QTL           | average daily gain QTL (16849)                     |          |              |                     |
|          |   |          |          | 5        | 23288996  | 24074802                 | 6647815                                            | 33251630 | Exterior_QTL | Ear size QTL (5641) |

|          |           |                          |                                                     |
|----------|-----------|--------------------------|-----------------------------------------------------|
| 4668251  | 71054179  | Exterior_QTL             | Ear erectness QTL (5647)                            |
| 5246724  | 69217993  | Exterior_QTL             | Ear erectness QTL (5652)                            |
| 6647815  | 71054179  | Exterior_QTL             | Ear weight QTL (8858)                               |
| 6647815  | 71054179  | Exterior_QTL             | Ear weight QTL (8859)                               |
| 6647815  | 71054179  | Exterior_QTL             | Ear area QTL (8860)                                 |
| 6647815  | 71054179  | Exterior_QTL             | Ear area QTL (8861)                                 |
| 6647815  | 71054179  | Exterior_QTL             | Ear erectness QTL (8862)                            |
| 7985523  | 44572091  | Health_QTL               | C3c concentration QTL (9620)                        |
| 6737471  | 62167964  | Health_QTL               | White blood cell counts QTL (15049)                 |
| 18392751 | 109965003 | Health_QTL               | Cholesterol level QTL (15069)                       |
| 19558279 | 44572091  | Meat_Quality_Association | Drip loss QTL (9847)                                |
| 19558279 | 44572091  | Meat_Quality_Association | Conductivity 24 hours postmortem (loin) QTL (9848)  |
| 19558279 | 44572091  | Meat_Quality_Association | Conductivity 24 hours postmortem (loin) QTL (9849)  |
| 19558279 | 44572091  | Meat_Quality_Association | pH 45 minutes post mortem QTL (9850)                |
| 7985523  | 63117217  | Meat_Quality_Association | Meat color-b QTL (12083)                            |
| 7985523  | 63117217  | Meat_Quality_Association | Meat color-L QTL (12084)                            |
| 7985523  | 63117217  | Meat_Quality_Association | pH 24 hr post-mortem (loin) QTL (12085)             |
| 7985523  | 63117217  | Meat_Quality_Association | Shear force QTL (12086)                             |
| 3722572  | 35377762  | Meat_Quality_QTL         | Backfat at last lumbar QTL (31)                     |
| 19558279 | 63117217  | Meat_Quality_QTL         | backfat (17 weeks of age) QTL (202)                 |
| 19558279 | 63117217  | Meat_Quality_QTL         | backfat (40 kg live weight) QTL (203)               |
| 19558279 | 63117217  | Meat_Quality_QTL         | backfat (60 kg live weight) QTL (204)               |
| 4170852  | 33789566  | Meat_Quality_QTL         | Backfat thickness between 3rd and 4th rib QTL (412) |
| 19558279 | 63117217  | Meat_Quality_QTL         | Liver weight QTL (985)                              |
| 19558279 | 63117217  | Meat_Quality_QTL         | Shoulder external fat weight QTL (986)              |
| 19558279 | 35377762  | Meat_Quality_QTL         | CIE-b* QTL (2984)                                   |
| 19558279 | 35377762  | Meat_Quality_QTL         | Shear force QTL (2985)                              |
| 0        | 68590401  | Meat_Quality_QTL         | Carcass temperature (24 hr post-mortem) QTL (3307)  |
| 0        | 35377762  | Meat_Quality_QTL         | Drip loss QTL (3805)                                |
| 17031813 | 78579054  | Meat_Quality_QTL         | CIE-b* QTL (3918)                                   |
| 17031813 | 78579054  | Meat_Quality_QTL         | CIE-b* QTL (3919)                                   |
| 17031813 | 78579054  | Meat_Quality_QTL         | CIE-b* QTL (3920)                                   |
| 7096095  | 71907673  | Meat_Quality_QTL         | pH 24 hr post-mortem (loin) QTL (3990)              |
| 19558279 | 63117217  | Meat_Quality_QTL         | CIE-a* QTL (3991)                                   |
| 0        | 97859093  | Meat_Quality_QTL         | backfat above muscle dorsi QTL (5203)               |
| 584612   | 77414253  | Meat_Quality_QTL         | backfat at mid-back QTL (5209)                      |
| 0        | 105302891 | Meat_Quality_QTL         | backfat at mid-back QTL (5210)                      |
| 0        | 105302891 | Meat_Quality_QTL         | Shoulder subcutaneous fat thickness QTL (5219)      |
| 0        | 92485836  | Meat_Quality_QTL         | backfat above muscle dorsi QTL (5238)               |
| 10592679 | 88540972  | Meat_Quality_QTL         | backfat at mid-back QTL (5244)                      |



|    |          |          |          |          |                  |                                             |
|----|----------|----------|----------|----------|------------------|---------------------------------------------|
|    |          |          | 19558279 | 63117217 | Meat_Quality_QTL | Linoleic acid percentage QTL (9573)         |
|    |          |          | 6647815  | 35377762 | Production_QTL   | Body weight (birth) QTL (3189)              |
|    |          |          | 22412792 | 63117217 | Reproduction_QTL | uterine horn length QTL (10619)             |
| 11 | 71519780 | 71559246 | 31594979 | 78227264 | Exterior_QTL     | Time spent drinking QTL (5914)              |
|    |          |          | 31594979 | 78227264 | Health_QTL       | Body temperature QTL (7508)                 |
|    |          |          | 31594979 | 78227264 | Health_QTL       | Eosinophil number QTL (7509)                |
|    |          |          | 60053411 | 75366022 | Health_QTL       | Toll-like receptor 9 level QTL (17623)      |
|    |          |          | 54245356 | 75366022 | Meat_Quality_QTL | Average backfat thickness QTL (1117)        |
|    |          |          | 43692769 | 78901241 | Meat_Quality_QTL | Percentage angular fibers QTL (2817)        |
|    |          |          | 41897196 | 79769559 | Meat_Quality_QTL | Meat color score QTL (2954)                 |
|    |          |          | 41897196 | 79769559 | Meat_Quality_QTL | Drip loss QTL (2955)                        |
|    |          |          | 52388584 | 81069519 | Meat_Quality_QTL | Backfat at tenth rib (22 weeks) QTL (3211)  |
|    |          |          | 52388584 | 81069519 | Meat_Quality_QTL | Backfat at tenth rib (19 weeks) QTL (3218)  |
|    |          |          | 52388584 | 81069519 | Meat_Quality_QTL | 45 min-24 h pH decline QTL (3281)           |
|    |          |          | 52388584 | 81069519 | Meat_Quality_QTL | Muscle fat content QTL (3282)               |
|    |          |          | 52388584 | 81069519 | Meat_Quality_QTL | Muscle moisture percentage QTL (3283)       |
|    |          |          | 52388584 | 81069519 | Meat_Quality_QTL | Empty body lipid content QTL (3319)         |
|    |          |          | 60053411 | 73438559 | Meat_Quality_QTL | Ham fat thickness QTL (3963)                |
|    |          |          | 51764346 | 81069519 | Meat_Quality_QTL | Lean meat percentage QTL (3964)             |
|    |          |          | 51764346 | 81069519 | Meat_Quality_QTL | Number of ribs QTL (3965)                   |
|    |          |          | 18695760 | 78901241 | Meat_Quality_QTL | backfat at mid-back QTL (5214)              |
|    |          |          | 41897196 | 75366022 | Meat_Quality_QTL | Percentage type I fibers QTL (7027)         |
|    |          |          | 54245356 | 75366022 | Meat_Quality_QTL | backfat at last rib QTL (16838)             |
|    |          |          | 52388584 | 81069519 | Meat_Quality_QTL | Backfat at last rib (19 weeks) QTL (16934)  |
|    |          |          | 52388584 | 81069519 | Meat_Quality_QTL | Backfat at tenth rib (19 weeks) QTL (16935) |
|    |          |          | 52388584 | 81069519 | Meat_Quality_QTL | Empty body lipid content QTL (16936)        |
|    |          |          | 54245356 | 75366022 | Production_QTL   | Body weight (slaughter) QTL (1115)          |
|    |          |          | 54245356 | 75366022 | Production_QTL   | Feed intake QTL (1118)                      |
|    |          |          | 41897196 | 75366022 | Reproduction_QTL | Nonfunctional nipples QTL (7464)            |
|    |          |          | 60053411 | 87690581 | Reproduction_QTL | Nonfunctional nipples QTL (7478)            |
|    |          |          | 52388584 | 78227264 | Reproduction_QTL | Number of stillborn QTL (7534)              |
| 11 | 77297111 | 77299461 | 31594979 | 78227264 | Exterior_QTL     | Time spent drinking QTL (5914)              |
|    |          |          | 31594979 | 78227264 | Health_QTL       | Body temperature QTL (7508)                 |
|    |          |          | 31594979 | 78227264 | Health_QTL       | Eosinophil number QTL (7509)                |
|    |          |          | 75173457 | 87690581 | Meat_Quality_QTL | Belly weight QTL (424)                      |
|    |          |          | 43692769 | 78901241 | Meat_Quality_QTL | Percentage angular fibers QTL (2817)        |
|    |          |          | 41897196 | 79769559 | Meat_Quality_QTL | Meat color score QTL (2954)                 |
|    |          |          | 41897196 | 79769559 | Meat_Quality_QTL | Drip loss QTL (2955)                        |
|    |          |          | 52388584 | 81069519 | Meat_Quality_QTL | Backfat at tenth rib (22 weeks) QTL (3211)  |
|    |          |          | 52388584 | 81069519 | Meat_Quality_QTL | Backfat at tenth rib (19 weeks) QTL (3218)  |

|    |          |          |          |           |                  |                                                     |
|----|----------|----------|----------|-----------|------------------|-----------------------------------------------------|
|    |          |          | 52388584 | 81069519  | Meat_Quality_QTL | 45 min-24 h pH decline QTL (3281)                   |
|    |          |          | 52388584 | 81069519  | Meat_Quality_QTL | Muscle fat content QTL (3282)                       |
|    |          |          | 52388584 | 81069519  | Meat_Quality_QTL | Muscle moisture percentage QTL (3283)               |
|    |          |          | 52388584 | 81069519  | Meat_Quality_QTL | Empty body lipid content QTL (3319)                 |
|    |          |          | 51764346 | 81069519  | Meat_Quality_QTL | Lean meat percentage QTL (3964)                     |
|    |          |          | 51764346 | 81069519  | Meat_Quality_QTL | Number of ribs QTL (3965)                           |
|    |          |          | 18695760 | 78901241  | Meat_Quality_QTL | backfat at mid-back QTL (5214)                      |
|    |          |          | 74497665 | 78769167  | Meat_Quality_QTL | Palmitic acid percentage QTL (15858)                |
|    |          |          | 73438559 | 78480320  | Meat_Quality_QTL | Linoleic acid percentage QTL (15885)                |
|    |          |          | 52388584 | 81069519  | Meat_Quality_QTL | Backfat at last rib (19 weeks) QTL (16934)          |
|    |          |          | 52388584 | 81069519  | Meat_Quality_QTL | Backfat at tenth rib (19 weeks) QTL (16935)         |
|    |          |          | 52388584 | 81069519  | Meat_Quality_QTL | Empty body lipid content QTL (16936)                |
|    |          |          | 60053411 | 87690581  | Reproduction_QTL | Nonfunctional nipples QTL (7478)                    |
|    |          |          | 52388584 | 78227264  | Reproduction_QTL | Number of stillborn QTL (7534)                      |
| 14 | 24592939 | 24779049 | 16066507 | 41217524  | Exterior_QTL     | Front leg conformation QTL (8923)                   |
|    |          |          | 6898350  | 132900893 | Exterior_QTL     | Osteochondrosis score QTL (17643)                   |
|    |          |          | 13351847 | 93372131  | Health_QTL       | Creatinine level QTL (6362)                         |
|    |          |          | 13351847 | 93372131  | Health_QTL       | Creatinine level QTL (6364)                         |
|    |          |          | 13351847 | 93372131  | Health_QTL       | Potassium level QTL (6384)                          |
|    |          |          | 9681757  | 60644503  | Health_QTL       | Melanoma susceptibility QTL (7572)                  |
|    |          |          | 6898350  | 132053949 | Health_QTL       | C3c concentration QTL (9630)                        |
|    |          |          | 6898350  | 132053949 | Health_QTL       | Haptoglobin concentration QTL (9653)                |
|    |          |          | 21769781 | 113487423 | Health_QTL       | Calcium level QTL (15079)                           |
|    |          |          | 9757277  | 139008797 | Meat_Quality_QTL | Loin muscle area QTL (7)                            |
|    |          |          | 19260466 | 60644503  | Meat_Quality_QTL | Trimmed wholesale product / live weight QTL (14)    |
|    |          |          | 24310612 | 115480974 | Meat_Quality_QTL | Trimmed wholesale product / carcass weight QTL (18) |
|    |          |          | 6898350  | 41217524  | Meat_Quality_QTL | Meat color-a QTL (236)                              |
|    |          |          | 6898350  | 41217524  | Meat_Quality_QTL | Backfat (average) thickness - ultrasound QTL (354)  |
|    |          |          | 19401623 | 132053949 | Meat_Quality_QTL | Fat androstenone level (100 days) QTL (606)         |
|    |          |          | 19401623 | 132053949 | Meat_Quality_QTL | Fat androstenone level (120 days) QTL (607)         |
|    |          |          | 19401623 | 132053949 | Meat_Quality_QTL | Fat androstenone level (140 days) QTL (608)         |
|    |          |          | 19401623 | 132053949 | Meat_Quality_QTL | Fat androstenone level (160 days) QTL (609)         |
|    |          |          | 6898350  | 133183207 | Meat_Quality_QTL | Percentage type I fibers QTL (2822)                 |
|    |          |          | 6898350  | 133183207 | Meat_Quality_QTL | Percentage type IIb fibers QTL (2823)               |
|    |          |          | 6898350  | 133183207 | Meat_Quality_QTL | Percentage type I fibers QTL (2824)                 |
|    |          |          | 16066507 | 132053949 | Meat_Quality_QTL | Average instron (star probe) force QTL (3814)       |
|    |          |          | 6898350  | 41487784  | Meat_Quality_QTL | Meat color-L QTL (3825)                             |
|    |          |          | 19260466 | 65129650  | Meat_Quality_QTL | Loin muscle area QTL (3861)                         |
|    |          |          | 8528044  | 143234735 | Meat_Quality_QTL | Shear force QTL (3925)                              |
|    |          |          | 8528044  | 149890749 | Meat_Quality_QTL | Shear force at first peak QTL (3929)                |

|  |  |  |          |           |                  |                                               |
|--|--|--|----------|-----------|------------------|-----------------------------------------------|
|  |  |  | 8528044  | 149890749 | Meat_Quality_QTL | Shear force at first peak QTL (3930)          |
|  |  |  | 8528044  | 149890749 | Meat_Quality_QTL | Shear force at first peak QTL (3931)          |
|  |  |  | 16066507 | 27887165  | Meat_Quality_QTL | Relative area of type IIb fibers QTL (4034)   |
|  |  |  | 16066507 | 41217524  | Meat_Quality_QTL | skatole, sensory panel QTL (4237)             |
|  |  |  | 16066507 | 41217524  | Meat_Quality_QTL | subjective boar flavor in lean QTL (4238)     |
|  |  |  | 16066507 | 41217524  | Meat_Quality_QTL | subjective boar flavor in fat QTL (4241)      |
|  |  |  | 16066507 | 41217524  | Meat_Quality_QTL | subjective abnormal odor QTL (4242)           |
|  |  |  | 6898350  | 132053949 | Meat_Quality_QTL | backfat above muscle dorsi QTL (5991)         |
|  |  |  | 19260466 | 81745465  | Meat_Quality_QTL | Diameter of type IIa muscle fibers QTL (7018) |
|  |  |  | 19260466 | 81745465  | Meat_Quality_QTL | Percentage type IIb fibers QTL (7024)         |
|  |  |  | 19260466 | 81745465  | Meat_Quality_QTL | Diameter of type IIb muscle fibers QTL (7038) |
|  |  |  | 6898350  | 66305680  | Meat_Quality_QTL | Stearic acid percentage QTL (15870)           |
|  |  |  | 6898350  | 66305680  | Meat_Quality_QTL | Linoleic acid percentage QTL (15871)          |
|  |  |  | 6898350  | 27531879  | Meat_Quality_QTL | backfat at last rib QTL (16841)               |
|  |  |  | 10962367 | 153851969 | Production_QTL   | Body weight (birth) QTL (5233)                |
|  |  |  | 6898350  | 132053949 | Production_QTL   | Daily feed intake QTL (5722)                  |
|  |  |  | 19260466 | 29711236  | Reproduction_QTL | Number of stillborn QTL (7535)                |
